# Supplementary material for: Overexpression of Umellularia californica FatB thioesterase affects plant growth and lipid metabolome leading to improved drought tolerance in Arabidopsis and tomato
Source: Front Plant Sci. 2025 Jan 10;15:1446210. doi: 10.3389/fpls.2024.1446210 (PMC11757637; doi:10.3389/fpls.2024.1446210)
Supplement: Supplementary Table 1 — Metabolites information of total lipids analysis in Col-0 and UcFatB-OE (UC16). [file Table1.xlsx]

## Sheet: Sheet1
	AWUWU			WEGROUP
	眼线笔			洗发水
	眉笔			蓝莓汁
	睫毛膏			番茄肉酱面
	四代耳机
				5月	6月	7月	8月	9月	10月	11月	12月	1月	2月	3月	4月	5月
项目	农委项目	园艺
		黄瓜
	面上项目	CLE
		ABCG26
文章	复旦	CLE19-BES1
		BAM3	补数据
			修改文章
			投稿
			补实验
	华师大	基因组	上传数据
			投回
		UcFATB	转投
			补数据
		IAA9
		ABCG26
		FATB2
		KAR
		SPL3
		ASHHs
		番茄小肽鉴定

## Sheet: Sheet2
	我	娃	妈妈	老江
5:30-6:00	洗漱、化妆
6:00-6:30	论文写作
6:30-7:00
7:00-7:30		起床，运动，洗漱
7:30-8:00	早饭，看书，带娃	喝牛奶吃早饭	打扫，准备早饭
8:00-8:30		看书，浇花，喂猫
8:30-9:00	工作	户外活动	陪玩
9:00-9:30
9:30-10:00
10:00-10:30
10:30-11:00		在家玩	做饭
11:00-11:30	陪娃玩
11:30-12:00	午饭	午饭	午饭
12:00-12:30	陪娃，给猫梳毛	自由活动	自由时间
12:30-13:00	哄睡	午睡
13:00-13:30	工作
13:30-14:00
14:00-14:30
14:30-15:00
15:00-15:30		下午茶
15:30-16:00		玩
16:00-16:30			户外
16:30-17:00
17:00-17:30			做饭
17:30-18:00		吃晚饭
18:00-18:30	扔垃圾，洗澡
18:30-19:00
19:00-19:30		画画
19:30-20:00		整理房间（归位）
20:00-20:30		洗澡、绘本、动画片
20:30-21:00
21:00-21:30		睡觉
21:30-22:00

## Sheet: 数据矩阵
Table S1 Metabolites information of total lipids analysis in Col-0 and UcFatB-OE(UC16).
ID	m/z	Retention time (min)	Ion mode	Metabolites	LM ID	Category (Super Class)	Main Class	Sub Class	Common Class	level	kegg	Score	Fragmentation Score	Adducts	Formula	Mass Error (ppm)	QC4	QC5	QC6	QC7	Col-0-1	Col-0-2	Col-0-3	Col-0-4	UC16-1	UC16-2	UC16-3	UC16-4
0.34_269.2109m/z	269.211	0.339567	pos	10-hydroxy-16-oxo-hexadecanoic acid	LMFA01170060	Fatty Acyls	Fatty Acids and Conjugates	Dicarboxylic acids	FA			39.4	2.49	M+H-H2O	C16H30O4	-0.843921	18390.1	16337.9	15388.9	13814.4	20103.3	19515.1	21087.6	21857.5	15226	14770.3	14898.6	15240.7
18.00_269.2109m/z	269.211	18.0037	pos	9-hydroxy-16-oxo-hexadecanoic acid	LMFA01170059	Fatty Acyls	Fatty Acids and Conjugates	Dicarboxylic acids	FA			40.1	6.57	M+H-H2O	C16H30O4	-0.828917	16613.6	14869	14938.2	12427.5	19295.9	19218.9	18967.3	17269.6	13863.9	13936.4	13413.6	13022.3
4.82_335.2191m/z	335.219	4.82272	pos	9Z-octadecenedioic acid	LMFA01170055	Fatty Acyls	Fatty Acids and Conjugates	Dicarboxylic acids	FA			37.9	0	M+Na	C18H32O4	-0.618515	10707.8	12584.5	14314	12085	15406.2	11783.5	16391.1	12383.4	9149.15	13127.3	11381.8	13568.4
0.70_230.1517n	229.145	0.700833	neg	Dodecanedioic acid	LMFA01170009	Fatty Acyls	Fatty Acids and Conjugates	Dicarboxylic acids	FA		C02678	38.8	0	M-H2O-H, M-H	C12H22O4	-0.672708	859.256	969.118	947.556	906.654	1486.79	1363.66	1141.37	1038.54	692.771	743.89	809.82	659.187
14.12_337.2348m/z	337.235	14.1177	pos	Octadecanedioic acid	LMFA01170029	Fatty Acyls	Fatty Acids and Conjugates	Dicarboxylic acids	FA			38.2	0	M+Na	C18H34O4	-0.312203	34484.2	37907.5	35800.3	37143.8	32058.5	32920.6	35957.5	36380.4	29791	35562.3	29130.4	30950.1
3.22_332.2793m/z	332.279	3.22143	pos	10-hydroxy-9-oxo-octadecanoic acid	LMFA01050538	Fatty Acyls	Fatty Acids and Conjugates	Hydroxy fatty acids	FA			37.6	0	M+NH4	C18H34O4	-0.760178	5173.46	4902.46	5950.73	6012.34	4577.36	4260.56	4407.53	4399.82	6000.76	6230.34	8092.61	7293.13
1.18_362.3263m/z	362.326	1.18488	pos	11,12-dihydroxy-eicosanoic acid	LMFA01050095	Fatty Acyls	Fatty Acids and Conjugates	Hydroxy fatty acids	FA			47.3	42	M+NH4	C20H40O4	-0.421705	57609.7	54214.8	57985.5	52792.6	40096.5	62464.5	47375.3	46194.4	81383.4	6593.54	104591	54068.4
13.45_237.1456m/z	237.146	13.451	pos	12-hydroxy-10-dodecenoic acid	LMFA01050168	Fatty Acyls	Fatty Acids and Conjugates	Hydroxy fatty acids	FA			38.2	0	M+Na	C12H22O3	-2.22869	16356.9	12822	14124.7	13503.5	16096.2	18689.5	17828.4	16703.6	14441.5	12768	12174.9	12418.5
15.73_237.1457m/z	237.146	15.7299	pos	12-hydroxy-3Z-dodecenoic acid	LMFA01050170	Fatty Acyls	Fatty Acids and Conjugates	Hydroxy fatty acids	FA			37.4	0	M+Na	C12H22O3	-2.09637	22721.4	20102.9	18121.6	16721.3	21585	23301.6	23104.1	21960.5	20928.9	18893.9	16623.9	17419.7
2.53_390.3577m/z	390.358	2.53188	pos	13,14-dihydroxy-docosanoic acid	LMFA01050211	Fatty Acyls	Fatty Acids and Conjugates	Hydroxy fatty acids	FA			38.6	0	M+NH4	C22H44O4	-0.117608	7414.02	6226.94	6162.05	6157.24	6427.77	4717.13	4928.25	5717.11	5351.07	6975.93	5717.64	6210.74
3.29_374.3626m/z	374.363	3.28522	pos	13-hydroxy-docosanoic acid	LMFA01050210	Fatty Acyls	Fatty Acids and Conjugates	Hydroxy fatty acids	FA			39.6	7.08	M+NH4	C22H44O3	-0.875852	43503.7	35654.6	42704.5	44028.1	36881.7	31077.6	32662.4	37578.9	35957.8	35136.1	37710.6	31995.9
0.77_262.2377m/z	262.238	0.772833	pos	14-hydroxy-tetradecanoic acid	LMFA01050044	Fatty Acyls	Fatty Acids and Conjugates	Hydroxy fatty acids	FA			53.2	69	M+NH4	C14H28O3	-0.00289057	68025.2	71382.8	69746.5	71317.5	67806.3	58344.2	70877.1	70790.4	73392.1	61285.9	75529.8	65077
18.00_271.2266m/z	271.227	18.0037	pos	16-hydroxy-9E-hexadecenoic acid	LMFA01050192	Fatty Acyls	Fatty Acids and Conjugates	Hydroxy fatty acids	FA			45.7	33.3	M+H	C16H30O3	-0.786893	21245.3	19412.6	18953.6	16379.5	23354.5	24151.8	23936.2	22205.8	17519.2	17569.6	17140.7	15635.1
0.01_271.2266m/z	271.227	0.00705	pos	16-hydroxy-9Z-hexadecenoic acid	LMFA01050193	Fatty Acyls	Fatty Acids and Conjugates	Hydroxy fatty acids	FA			42.4	16.9	M+H	C16H30O3	-0.713401	22510.1	19454	18724.7	16577.3	23309.2	23785.6	24900.8	24789.1	19279.8	19017.8	16701.6	18721.1
2.22_343.1880m/z	343.188	2.21853	pos	2,15,16-trihydroxy-hexadecanoic acid	LMFA01050099	Fatty Acyls	Fatty Acids and Conjugates	Hydroxy fatty acids	FA			38.6	0	M+K	C16H32O5	-0.365502	1093.9	1179.29	777.843	899.399	1564.79	867.647	1151.84	1351.78	1375.93	745.683	983.892	883.406
3.16_346.3313m/z	346.331	3.1554	pos	20-hydroxy-eicosanoic acid	LMFA01050075	Fatty Acyls	Fatty Acids and Conjugates	Hydroxy fatty acids	FA			54.1	77.1	M+NH4	C20H40O3	-0.771395	54363	52243.4	51465.5	59446.1	83891.1	71987.5	55834.9	69988.5	92289	42578.2	85382.4	49531
1.95_390.3580m/z	390.358	1.94775	pos	3R,7R-dihydroxy-docosanoic acid	LMFA01050425	Fatty Acyls	Fatty Acids and Conjugates	Hydroxy fatty acids	FA			38.2	0	M+NH4	C22H44O4	0.578164	2293.09	2118.91	2179.09	2144.6	1753.43	2083.57	2218.54	2850.33	2379.1	2158.35	2210.31	1964.96
1.92_313.2372m/z	313.237	1.92492	pos	5,8,12-trihydroxy-9-octadecenoic acid	LMFA01050543	Fatty Acyls	Fatty Acids and Conjugates	Hydroxy fatty acids	FA			37.6	0	M+H-H2O	C18H34O5	-0.351593	9408.46	8563.02	8257.39	7337.73	10100.8	9159.93	9030.76	8948.52	7043.32	7500.16	6912.12	8197.62
0.78_403.2715m/z	403.271	0.778183	neg	9,13-dihydroxy-10-ethoxy-11-octadecenoic acid	LMFA01050121	Fatty Acyls	Fatty Acids and Conjugates	Hydroxy fatty acids	FA			37.3	0	M+FA-H	C20H38O5	3.73518	427.147	513.058	534.84	591.115	362.545	327.2	430.665	325.45	510.583	542.268	550.977	498.536
4.10_341.2685m/z	341.269	4.09748	pos	9,13-dihydroxy-12-ethoxy-10-octadecenoic acid	LMFA01050122	Fatty Acyls	Fatty Acids and Conjugates	Hydroxy fatty acids	FA			37.6	0	M+H-H2O	C20H38O5	-0.347087	25075.6	26302.6	30864.3	23132.8	24200.2	23362.9	23902.2	28199.5	26126.9	25643.5	26629.9	23133.2
2.69_332.3158m/z	332.316	2.6879	pos	10-methoxy-octadecanoic acid	LMFA01080026	Fatty Acyls	Fatty Acids and Conjugates	Methoxy fatty acids	FA			48.9	50.1	M+NH4	C19H38O3	-0.366211	24848.6	22184.7	23980.1	23917.2	26248.3	23148.3	24983.7	24768.9	24640	23036.3	22430	21030.6
0.77_381.2613m/z	381.261	0.772833	pos	11,13-dimethoxy-12-hydroxy-9-octadecenoic acid	LMFA01080003	Fatty Acyls	Fatty Acids and Conjugates	Methoxy fatty acids	FA			39.7	6.02	M+Na	C20H38O5	0.508834	13086.2	13661.3	11858.9	13231.9	20066.4	11142.5	15833.3	15572.2	9478.95	13172.4	11707.9	11030
3.41_302.2688m/z	302.269	3.41383	pos	2-methoxy-5Z-hexadecenoic acid	LMFA01080001	Fatty Acyls	Fatty Acids and Conjugates	Methoxy fatty acids	FA			36.3	0	M+NH4	C17H32O3	-0.57145	5458.85	7686.97	6644.52	8862.51	4871.23	6573.77	4862.7	5539.7	4781.52	6218.41	6474.73	6224.06
3.18_327.2890m/z	327.289	3.17613	pos	8,10-dimethoxy-octadecanoic acid	LMFA01080017	Fatty Acyls	Fatty Acids and Conjugates	Methoxy fatty acids	FA			43.9	26.3	M+H-H2O	C20H40O4	-1.01383	43450.4	43169.2	46130.5	46321.8	36005.6	39006.9	48335.2	48864.7	41730	35466.1	54395.1	38760
17.85_327.2527m/z	327.253	17.8486	pos	8-methoxy-13-hydroxy-9,11-octadecadienoic acid	LMFA01080002	Fatty Acyls	Fatty Acids and Conjugates	Methoxy fatty acids	FA			38.9	1.93	M+H	C19H34O4	-0.766882	14740.9	14985.1	14701.7	12019.9	16516.1	16589.4	16241.3	14882.1	12176.2	12965.9	11535.9	13468.8
3.79_271.2266m/z	271.227	3.78845	pos	11-oxo-hexadecanoic acid	LMFA01060058	Fatty Acyls	Fatty Acids and Conjugates	Oxo fatty acids	FA			38.3	0	M+H	C16H30O3	-0.654545	12502.9	11858	10397.8	10361.7	17326.7	8576.25	13973.4	10736.3	7794.01	8942.2	8531.32	6709.84
0.74_253.1088m/z	253.109	0.736417	neg	12-oxo-5E,8E,10Z-dodecatrienoic acid	LMFA01060095	Fatty Acyls	Fatty Acids and Conjugates	Oxo fatty acids	FA			38.3	0	M+FA-H	C12H16O3	3.09926	272.391	286.377	226.881	304.625	97.4968	141.221	151.72	183.192	442.318	462.695	486.382	292.783
1.25_288.2535m/z	288.253	1.25075	pos	15-oxo-hexadecanoic acid	LMFA01060105	Fatty Acyls	Fatty Acids and Conjugates	Oxo fatty acids	FA			42.3	22.2	M+NH4	C16H30O3	0.651058	5090.2	4695.77	4029.42	4875.69	5622.64	5521.45	4800.15	6098.58	5108.28	4404.39	2930.51	3890.92
3.77_337.2348m/z	337.235	3.76592	pos	2-oxo-3-hydroxy-octadecanoic acid	LMFA01060209	Fatty Acyls	Fatty Acids and Conjugates	Oxo fatty acids	FA			37.6	0	M+Na	C18H34O4	-0.25612	10100	13595.2	14851.7	13341.4	15912.6	16756.2	12464.1	17030.5	13400.1	13985.3	13891.7	12652.4
4.07_372.3471m/z	372.347	4.07487	pos	2-oxo-docosanoic acid	LMFA01060140	Fatty Acyls	Fatty Acids and Conjugates	Oxo fatty acids	FA			38.1	0	M+NH4	C22H42O3	-0.466148	16181.6	16468.1	14591.6	17457.1	20710.6	16672.7	15533	13941.5	14649.6	17301.1	17064.6	16674.9
11.98_237.1458m/z	237.146	11.9803	pos	3-oxo-dodecanoic acid	LMFA01060091	Fatty Acyls	Fatty Acids and Conjugates	Oxo fatty acids	FA		C02367	38.7	0	M+Na	C12H22O3	-1.61292	10484.9	8128.04	9950.39	10604.9	12248.3	13819	12655.4	13973.3	10413.9	9578.21	10577.4	10008.1
0.56_269.2129m/z	269.213	0.557417	neg	3-oxo-hexadecanoic acid	LMFA01060051	Fatty Acyls	Fatty Acids and Conjugates	Oxo fatty acids	FA			41.4	17.9	M-H	C16H30O3	2.54783	2749.75	2672.61	2540.75	2305.76	2514.99	2682.59	2437.29	2385.13	2301.03	2434.67	2650.33	3201.2
16.28_270.2194n	253.216	16.2837	pos	8-oxo-hexadecanoic acid	LMFA01060055	Fatty Acyls	Fatty Acids and Conjugates	Oxo fatty acids	FA			38.5	0	M+H-H2O, M+H	C16H30O3	-0.278006	114235	105062	102450	88616	130098	125051	127780	133036	96884.8	100563	93453.9	93089.1
2.87_207.0989m/z	207.099	2.86688	pos	9-oxo-2E-decenoic acid	LMFA01060082	Fatty Acyls	Fatty Acids and Conjugates	Oxo fatty acids	FA			38.3	0	M+Na	C10H16O3	-1.22637	30651.5	30561.2	30589.9	29057.9	30103.5	31455.3	33211.9	34416.3	30698.6	29862	25917.1	29122.5
5.00_207.0989m/z	207.099	4.99768	pos	9-oxo-2Z-decenoic acid	LMFA01060083	Fatty Acyls	Fatty Acids and Conjugates	Oxo fatty acids	FA			38	0	M+Na	C10H16O3	-1.43246	18666.7	18030.3	20317.9	16647.8	18930.5	17726.8	21866.1	22721.7	20668.3	18252.1	17666.3	16694.6
1.02_195.1388m/z	195.139	1.02103	neg	9-oxo-dodecanoic acid	LMFA01060040	Fatty Acyls	Fatty Acids and Conjugates	Oxo fatty acids	FA			44	26	M-H2O-H	C12H22O3	-1.26159	622.537	462.525	509.476	619.349	807.109	897.204	664.544	952.815	1056.21	935.552	854.031	900.239
2.15_288.2537m/z	288.254	2.15057	pos	9-oxo-hexadecanoic acid	LMFA01060056	Fatty Acyls	Fatty Acids and Conjugates	Oxo fatty acids	FA			38.3	0	M+NH4	C16H30O3	1.5339	5876.65	5398.77	5223.4	5254.3	6676.29	6578.3	6317.9	6338.93	5794.62	4875.35	6040.51	5233.17
3.29_330.3363m/z	330.336	3.28522	pos	Eicosanoic acid	LMFA01010020	Fatty Acyls	Fatty Acids and Conjugates	Straight chain fatty acids	FA	**	C06425	50.3	56.5	M+NH4	C20H40O2	-1.0771	723766	741295	726648	733308	895931	787244	681531	647870	751043	656171	702103	699658
0.01_256.2400n	257.247	0.00705	pos	Hexadecanoic acid	LMFA01010001	Fatty Acyls	Fatty Acids and Conjugates	Straight chain fatty acids	FA	**	C00249	41.8	12.9	M+H, M+Na, M+H-H2O	C16H32O2	-0.793087	91635	75418.7	78366.4	69518.2	93291.6	94158.3	100265	95209.6	76501.7	75930	71761	73905
0.43_284.2714n	285.279	0.428317	pos	Octadecanoic acid	LMFA01010018	Fatty Acyls	Fatty Acids and Conjugates	Straight chain fatty acids	FA	**	C01530	39.3	2.06	M+H-H2O, M+H	C18H36O2	-0.623491	39247	33023.4	35426	32286.1	36815.8	38369.5	41215.9	40553.5	32087.7	33455.4	31578	33462.1
3.55_386.3990m/z	386.399	3.54548	pos	Tetracosanoic acid	LMFA01010024	Fatty Acyls	Fatty Acids and Conjugates	Straight chain fatty acids	FA	**	C08320	46.7	39.8	M+NH4	C24H48O2	-0.655758	36086.5	31947.6	32205.2	30113.5	37895.3	14484.8	14309.1	75951.6	21688.6	32030.2	60917.1	31618.9
2.26_267.1720m/z	267.172	2.26355	pos	Tetradecanoic acid	LMFA01010014	Fatty Acyls	Fatty Acids and Conjugates	Straight chain fatty acids	FA	**	C06424	40.2	7.39	M+K	C14H28O2	-0.177712	1470.5	1555.53	1391.73	1397.89	3153.04	4224.21	3992.74	3095.5	4737.4	3447.78	3086.03	2407.01
3.09_307.2629m/z	307.263	3.08883	pos	11Z,14Z,17Z-eicosatrienoic acid	LMFA01030378	Fatty Acyls	Fatty Acids and Conjugates	Unsaturated fatty acids	FA	**	C16522	38.5	0	M+H	C20H34O2	-0.676476	1305.29	1060.37	1376.29	1851.51	1318.16	467.421	1166.19	1019.8	903.945	617.954	971.202	722.336
3.33_334.2868n	352.321	3.32978	pos	13,16,19-docosatrienoic acid	LMFA01030407	Fatty Acyls	Fatty Acids and Conjugates	Unsaturated fatty acids	FA			50.4	60.2	M+H, M+NH4	C22H38O2	-1.05462	226189	211732	203702	205353	173946	242041	183641	251578	153187	162336	140832	221347
17.96_254.2244n	255.232	17.9593	pos	13-hexadecenoic acid	LMFA01030263	Fatty Acyls	Fatty Acids and Conjugates	Unsaturated fatty acids	FA			45.3	31.6	M+H-H2O, M+H	C16H30O2	-0.778435	39632.4	37957	37163.3	33508.6	43350.8	44204.1	44639.9	41518.7	33829.4	35331.9	33483	34898.4
3.09_354.3365m/z	354.336	3.08883	pos	13Z,16Z-docosadienoic acid	LMFA01030405	Fatty Acyls	Fatty Acids and Conjugates	Unsaturated fatty acids	FA	**	C16533	38.9	2.4	M+NH4	C22H40O2	-0.469457	21900.3	22377.1	19994.9	20828.2	19532.6	22767.9	20299	23297.4	21857.8	22652.6	21431.1	19684.1
0.01_254.2244n	255.232	0.00705	pos	13Z-hexadecenoic acid	LMFA01030264	Fatty Acyls	Fatty Acids and Conjugates	Unsaturated fatty acids	FA			44.1	25.7	M+H-H2O, M+H	C16H30O2	-0.870192	41687.5	37929.1	39079.4	33377.9	42538.1	42776.3	47776.7	47332.5	38283.9	36129.5	34952.2	35786.5
16.29_243.1603m/z	243.16	16.2876	neg	2-dodecenoic acid	LMFA01030037	Fatty Acyls	Fatty Acids and Conjugates	Unsaturated fatty acids	FA			38.8	0	M+FA-H	C12H22O2	0.630914	423.602	464.753	473.23	514.409	306.375	421.775	443.48	441.509	506.534	500.496	569.87	492.55
2.22_249.1849m/z	249.185	2.21853	pos	2E,6Z,8Z,12E-hexadecatetraenoic acid	LMFA01030277	Fatty Acyls	Fatty Acids and Conjugates	Unsaturated fatty acids	FA			51.8	66.4	M+H	C16H24O2	0.117373	3093.92	2913.05	2977.08	2800.49	2907.68	3723.81	2565.37	2984.63	3052.93	2461.85	3759.91	2568.81
17.49_249.1848m/z	249.185	17.4905	pos	2E,6Z,8Z,12Z-hexadecatetraenoic acid	LMFA01030278	Fatty Acyls	Fatty Acids and Conjugates	Unsaturated fatty acids	FA			49	49.6	M+H	C16H24O2	-0.411029	133836	127611	132462	119774	136341	137556	144560	151692	124639	125125	119396	118508
0.91_294.2427m/z	294.243	0.905717	pos	3E,9Z,12Z,15Z-octadecatetraenoic acid	LMFA01030167	Fatty Acyls	Fatty Acids and Conjugates	Unsaturated fatty acids	FA			37.6	0	M+NH4	C18H28O2	-0.319227	2076.07	1803.56	931.23	1231	850.246	1956.9	1185.28	1374.18	1454.54	1478.53	966.094	1724.38
0.79_233.1900m/z	233.19	0.794683	pos	4,7,10-hexadecatrienoic acid	LMFA01030134	Fatty Acyls	Fatty Acids and Conjugates	Unsaturated fatty acids	FA			38.9	0	M+H-H2O	C16H26O2	-0.158839	2036.49	1557.69	1465.75	1629.83	1566.93	1787.01	1838.38	1744.83	2053.46	1568.44	1701.6	1709.59
3.77_293.1766m/z	293.177	3.76512	neg	4,7,11,14-hexadecatetraenoic acid	LMFA01030164	Fatty Acyls	Fatty Acids and Conjugates	Unsaturated fatty acids	FA			38.4	0	M+FA-H	C16H24O2	2.94126	587.376	720.92	665.165	538.83	771.806	361.039	645.295	635.163	501.01	604.966	610.28	612.834
1.04_293.1768m/z	293.177	1.03988	neg	4,8,12,16-hexadecatetraenoic acid	LMFA01030165	Fatty Acyls	Fatty Acids and Conjugates	Unsaturated fatty acids	FA			37.9	0	M+FA-H	C16H24O2	3.95197	598.203	522.143	626.21	444.661	276.519	509.73	227.416	272.627	233.478	397.905	168.574	462.466
1.95_326.2246n	327.232	1.94775	pos	4Z,7Z,9E,11E,13Z,16Z,19Z-docosaheptaenoic acid	LMFA01031158	Fatty Acyls	Fatty Acids and Conjugates	Unsaturated fatty acids	FA			47.2	39.7	M+H-H2O, M+H, M+Na	C22H30O2	0.109944	49110.2	48002.9	44770.9	42733.8	51971	32858.7	38824	48748.9	47015.4	43099.3	42989.4	42206.7
1.04_295.1920m/z	295.192	1.03988	neg	5E,8E,11E-hexadecatrienoic acid	LMFA01030135	Fatty Acyls	Fatty Acids and Conjugates	Unsaturated fatty acids	FA			38.9	0	M+FA-H	C16H26O2	2.02138	100.914	105.753	198.524	136.938	112.209	83.5653	134.665	101.552	261.774	529.25	173.039	349.855
1.77_244.2272m/z	244.227	1.76653	pos	5E-tetradecenoic acid	LMFA01030913	Fatty Acyls	Fatty Acids and Conjugates	Unsaturated fatty acids	FA			38.6	0	M+NH4	C14H26O2	0.202363	1531.75	1328.7	1273.69	1393.41	1800.88	1629.93	1500.14	1545.01	1346.13	1064.39	1314.16	1168.58
1.20_225.1862m/z	225.186	1.19755	neg	5Z-tetradecenoic acid	LMFA01030248	Fatty Acyls	Fatty Acids and Conjugates	Unsaturated fatty acids	FA			38.3	0	M-H	C14H26O2	0.84644	236.719	257.737	310.09	337.201	385.428	414.257	374.14	197.049	124.987	395.207	142.321	223.635
2.11_259.2057m/z	259.206	2.10548	pos	6,9,12,15-octadecatetraenoic acid	LMFA01030169	Fatty Acyls	Fatty Acids and Conjugates	Unsaturated fatty acids	FA	**	C16300	38.2	0	M+H-H2O	C18H28O2	0.103773	1469.92	1306.3	1494.53	1512.52	1138.17	902.552	947.799	1401.02	1637.36	1427.06	1010.31	1217.73
3.26_277.2175m/z	277.218	3.26312	neg	6Z,9Z,12Z-octadecatrienoic acid	LMFA01030141	Fatty Acyls	Fatty Acids and Conjugates	Unsaturated fatty acids	FA	**	C06426	41.1	10.7	M-H	C18H30O2	0.831664	7753.81	7708.63	7925.32	9628.85	5850.37	6832.77	7259.18	7167.23	6583.1	9468.08	6309.55	7580.51
1.68_270.2432m/z	270.243	1.67672	pos	7Z,10Z-hexadecadienoic acid	LMFA01030807	Fatty Acyls	Fatty Acids and Conjugates	Unsaturated fatty acids	FA			38.4	0	M+NH4	C16H28O2	1.56804	10483.9	9529.95	9068.22	8496.47	8495.82	11578.1	9747.97	11172	8959.52	9906.22	8929.46	8495.04
3.33_283.2628m/z	283.263	3.32978	pos	7Z-octadecenoic acid	LMFA01030068	Fatty Acyls	Fatty Acids and Conjugates	Unsaturated fatty acids	FA			38.3	0	M+H	C18H34O2	-1.09417	6951.4	8003.41	7285.43	6532.24	6961.23	4458.94	5513.76	7473.75	6591.43	5279.71	4863.42	5802.05
17.92_252.2087n	253.216	17.9151	pos	8Z,10Z-hexadecadienoic acid	LMFA01030274	Fatty Acyls	Fatty Acids and Conjugates	Unsaturated fatty acids	FA			42.6	17.8	M+H-H2O, M+H	C16H28O2	-0.787233	34626.7	32267.8	31509.7	26780	37877.7	39329.1	39288.5	36356.6	28869.5	29201.2	27058.5	28357.9
2.89_324.2896m/z	324.29	2.88942	pos	8Z,11Z,14Z-eicosatrienoic acid	LMFA01030158	Fatty Acyls	Fatty Acids and Conjugates	Unsaturated fatty acids	FA	**	C03242	38.8	0	M+NH4	C20H34O2	-0.377043	3786.92	3492.2	4016.53	3612.42	3204.53	5109.61	3218.59	4921.29	2876.26	3386.22	2342.5	3417.37
1.64_323.2237m/z	323.224	1.64192	neg	9Z,11E,13Z-octadecatrienoic acid	LMFA01030146	Fatty Acyls	Fatty Acids and Conjugates	Unsaturated fatty acids	FA			37.7	0	M+FA-H	C18H30O2	3.30894	957.102	1061.63	1176.77	1004.15	957.591	124.389	600.579	524.464	986.513	1633.64	1417.84	1610.27
0.91_296.2584m/z	296.258	0.905717	pos	9Z,12Z,15Z-octadecatrienoic acid	LMFA01030152	Fatty Acyls	Fatty Acids and Conjugates	Unsaturated fatty acids	FA	**	C06427	39.5	0	M+NH4	C18H30O2	-0.0995244	1298.95	1046.44	1314.81	1210.22	672.9	1709.45	783.658	1038.55	792.977	1702.15	686.782	1537.19
0.34_252.2087n	253.216	0.339567	pos	9Z,12Z-hexadecadienoic acid	LMFA01030275	Fatty Acyls	Fatty Acids and Conjugates	Unsaturated fatty acids	FA	**	C08362	43.7	22.9	M+H-H2O, M+H	C16H28O2	-0.78344	41431.2	37639.9	36593.8	31382.6	43852.8	43813.5	45523.6	46517.7	35804	34684.1	33546.9	33374.1
2.71_298.2740m/z	298.274	2.70972	pos	9Z,12Z-octadecadienoic acid	LMFA01030120	Fatty Acyls	Fatty Acids and Conjugates	Unsaturated fatty acids	FA	**	C01595	51.2	59.3	M+NH4	C18H32O2	-0.0853855	170190	160844	145220	145479	109788	218096	154064	233125	127864	148561	127039	132210
0.45_283.2629m/z	283.263	0.449883	pos	9Z-octadecenoic acid	LMFA01030002	Fatty Acyls	Fatty Acids and Conjugates	Unsaturated fatty acids	FA	**	C00712	38.9	0.334	M+H	C18H34O2	-1.06491	19060	17162.2	17448.6	15485.6	18984.1	19809.6	21776.2	21760.5	15842.6	15754.3	16071.4	15710.1
16.26_227.2005m/z	227.201	16.2612	pos	9Z-tetradecenoic acid	LMFA01030051	Fatty Acyls	Fatty Acids and Conjugates	Unsaturated fatty acids	FA		C08322	37.9	0	M+H	C14H26O2	-0.162992	14713.1	14438	14928.4	12174	14127.8	15633.2	16464.4	17269.5	12947.9	13298.7	13177.1	12781.6
12.04_535.4310m/z	535.431	12.0441	pos	DG(12:0/16:0/0:0)	LMGL02010331	Glycerolipids	Diradylglycerols	Diacylglycerols	DG			37.7	0	M+Na	C31H60O5	-4.42392	32425.4	25181.7	28322.1	32557.4	14054.9	16240.4	11271.5	9310.43	37306.9	49584.9	31879.7	25945.6
4.14_528.4628m/z	528.463	4.14198	pos	DG(12:0/16:1(9Z)/0:0)	LMGL02010322	Glycerolipids	Diradylglycerols	Diacylglycerols	DG			37.2	0	M+NH4	C31H58O5	1.02426	67958.3	73499.3	63588.6	73040.4	82015.8	82544.3	84515.3	77077.3	67567.6	75333.8	58707.7	70232.9
10.90_551.5035m/z	551.504	10.9031	pos	DG(12:0/20:0/0:0)	LMGL02010340	Glycerolipids	Diradylglycerols	Diacylglycerols	DG			37.2	0	M+H-H2O	C35H68O5	0.259877	74070.4	82821.6	76571.2	90292.6	80250.6	116764	86152.5	97228.2	70540.3	116815	109855	100346
10.80_549.4879m/z	549.488	10.8004	pos	DG(12:0/20:1(11Z)/0:0)	LMGL02010341	Glycerolipids	Diradylglycerols	Diacylglycerols	DG			36.9	0	M+H-H2O	C35H66O5	0.243386	108836	77913.2	121668	88683.2	92758.3	94322.7	44348.4	71262.8	76746.5	124697	139191	94532.3
4.45_581.4203m/z	581.42	4.4481	pos	DG(12:0/20:5(5Z,8Z,11Z,14Z,17Z)/0:0)	LMGL02010345	Glycerolipids	Diradylglycerols	Diacylglycerols	DG			42	23.3	M+Na	C35H58O5	4.80122	99073.9	91484.1	88525.8	100921	121746	308623	133725	163132	8533.12	17848.8	44162.6	45354.8
10.86_579.5334m/z	579.533	10.8627	pos	DG(12:0/22:0/0:0)	LMGL02010347	Glycerolipids	Diradylglycerols	Diacylglycerols	DG			36.2	0	M+H-H2O	C37H72O5	-2.08908	93468	60957.1	80148.8	67433.6	100614	97170.3	114307	120165	88077.4	116319	98154.6	65416.9
9.07_577.5191m/z	577.519	9.07393	pos	DG(12:0/22:1(11Z)/0:0)	LMGL02010348	Glycerolipids	Diradylglycerols	Diacylglycerols	DG			36.8	0	M+H-H2O	C37H70O5	0.104562	20601.2	25130.6	23926.7	25984	27556.5	48942.7	17376.4	31832.6	25375.9	34171.7	47588.8	35049.8
6.50_592.5068n	575.503	6.49735	pos	DG(12:0/22:2(13Z,16Z)/0:0)	LMGL02010349	Glycerolipids	Diradylglycerols	Diacylglycerols	DG			41.1	10	M+H-H2O, M+Na	C37H68O5	0.172578	874517	854767	850080	889644	777282	1.1366e+06	997277	1.00004e+06	662057	815146	1.24453e+06	1.0591e+06
5.73_590.4909n	573.488	5.72568	pos	DG(12:0/22:3(10Z,13Z,16Z)/0:0)	LMGL02010350	Glycerolipids	Diradylglycerols	Diacylglycerols	DG			41.3	11.8	M+H-H2O, M+Na	C37H66O5	-0.279552	883142	885812	836178	893464	729193	1.13556e+06	988603	1.00278e+06	712184	794792	1.15048e+06	1.01297e+06
10.15_571.4723m/z	571.472	10.1515	pos	DG(12:0/22:4(7Z,10Z,13Z,16Z)/0:0)	LMGL02010351	Glycerolipids	Diradylglycerols	Diacylglycerols	DG			36.8	0	M+H-H2O	C37H64O5	0.370392	59245.4	64998.6	76306.4	79040.6	20707	13253.3	20160.2	42725	94034.2	81454.6	67687.5	72492.2
4.07_587.4676m/z	587.468	4.07487	pos	DG(12:0/22:5(7Z,10Z,13Z,16Z,19Z)/0:0)	LMGL02010352	Glycerolipids	Diradylglycerols	Diacylglycerols	DG			37	0	M+H	C37H62O5	1.0868	18015.2	19246.3	18486.9	20732.3	29577.6	57837.7	25566.3	54845.1	4287.36	4326.69	10073.4	7585.39
10.41_584.4439n	585.451	10.4127	pos	DG(12:0/22:6(4Z,7Z,10Z,13Z,16Z,19Z)/0:0)	LMGL02010353	Glycerolipids	Diradylglycerols	Diacylglycerols	DG			40.2	6.66	M+H-H2O, M+H	C37H60O5	-0.329707	1.38085e+06	1.40009e+06	1.58113e+06	1.42235e+06	991421	972590	1.22512e+06	1.06229e+06	1.62928e+06	1.48353e+06	1.57482e+06	1.55009e+06
7.49_561.4486m/z	561.449	7.49	pos	DG(14:0/16:1(9Z)/0:0)	LMGL02010379	Glycerolipids	Diradylglycerols	Diacylglycerols	DG			36.8	0	M+Na	C33H62O5	-0.57103	43025.3	48671.6	52310.3	48167	36409.5	43936.8	45407	51263.4	43576.8	55258.1	50957.7	45349.7
9.49_551.5035m/z	551.504	9.49225	pos	DG(14:0/18:0/0:0)	LMGL02010383	Glycerolipids	Diradylglycerols	Diacylglycerols	DG			36.9	0	M+H-H2O	C35H68O5	0.246532	11901.4	11753.2	18465.6	11950.3	27948.2	21063.9	23885	17831.8	14621.2	19966.2	25946.8	26855.1
3.83_587.4665m/z	587.467	3.83228	pos	DG(14:0/18:2(9Z,12Z)/0:0)	LMGL02010385	Glycerolipids	Diradylglycerols	Diacylglycerols	DG			36.2	0	M+Na	C35H64O5	3.42753	20477.8	21359	26819.2	27032.4	38666	70146	33236.9	83003.2	7718.96	7523.62	19535.1	10772.7
10.86_585.4512m/z	585.451	10.8627	pos	DG(14:0/18:3(9Z,12Z,15Z)/0:0)	LMGL02010386	Glycerolipids	Diradylglycerols	Diacylglycerols	DG			48.4	54.9	M+Na	C35H62O5	3.97209	329152	366626	343554	319661	250814	248911	348221	218601	417819	400618	417900	431630
10.07_577.5191m/z	577.519	10.0695	pos	DG(14:0/20:1(11Z)/0:0)	LMGL02010389	Glycerolipids	Diradylglycerols	Diacylglycerols	DG			36.7	0	M+H-H2O	C37H70O5	0.129166	75547.4	58625.3	94508.7	87823.1	92856.1	144547	73745.9	184583	43857.2	55536	48388.4	48662.8
7.31_575.5034m/z	575.503	7.31388	pos	DG(14:0/20:2(11Z,14Z)/0:0)	LMGL02010390	Glycerolipids	Diradylglycerols	Diacylglycerols	DG			41.1	10.4	M+H-H2O	C37H68O5	0.0373654	2.73374e+06	2.74754e+06	2.85522e+06	2.76539e+06	2.15219e+06	3.02763e+06	3.01748e+06	2.88171e+06	3.5655e+06	4.09656e+06	3.76659e+06	3.47551e+06
6.78_573.4876m/z	573.488	6.78392	pos	DG(14:0/20:3(8Z,11Z,14Z)/0:0)	LMGL02010391	Glycerolipids	Diradylglycerols	Diacylglycerols	DG			40.7	16.1	M+H-H2O	C37H66O5	-0.260132	274762	259265	238142	258485	238927	264959	261340	257616	348955	279467	408212	311902
7.45_571.4723m/z	571.472	7.44625	pos	DG(14:0/20:4(5Z,8Z,11Z,14Z)/0:0)	LMGL02010392	Glycerolipids	Diradylglycerols	Diacylglycerols	DG			36.6	0	M+H-H2O	C37H64O5	0.401819	68788.5	70189	53254.7	70342.9	64784.4	114916	51438.2	103000	12976.6	20901	47400.5	44086.3
6.56_609.4504m/z	609.45	6.56298	pos	DG(14:0/20:5(5Z,8Z,11Z,14Z,17Z)/0:0)	LMGL02010393	Glycerolipids	Diradylglycerols	Diacylglycerols	DG			36.9	0	M+Na	C37H62O5	2.39671	15792.1	13228.2	15729.2	14286.5	13298.7	27565.6	16713.8	19123.3	3638.96	1829.71	11232.2	6507.08
10.35_639.4960m/z	639.496	10.3541	pos	DG(14:0/22:4(7Z,10Z,13Z,16Z)/0:0)	LMGL02010399	Glycerolipids	Diradylglycerols	Diacylglycerols	DG			36.9	0	M+Na	C39H68O5	0.170211	407891	403848	427934	408872	431872	413629	512757	434208	415218	423320	416436	374623
10.86_615.4983m/z	615.498	10.8627	pos	DG(14:0/22:5(7Z,10Z,13Z,16Z,19Z)/0:0)	LMGL02010400	Glycerolipids	Diradylglycerols	Diacylglycerols	DG			36.5	0	M+H	C39H66O5	0.0513667	76303.9	83463.2	57348.5	67496.4	46261.1	45391.4	85450.4	99654.4	78952.4	58761.3	70225.4	56012.4
7.29_612.4754n	630.509	7.29102	pos	DG(14:0/22:6(4Z,7Z,10Z,13Z,16Z,19Z)/0:0)	LMGL02010401	Glycerolipids	Diradylglycerols	Diacylglycerols	DG			41.5	11.4	M+H, M+NH4	C39H64O5	0.0821234	1.37782e+06	1.40137e+06	1.33167e+06	1.4281e+06	1.67138e+06	1.47057e+06	1.73592e+06	1.4345e+06	1.32704e+06	1.20331e+06	1.13817e+06	1.13163e+06
7.93_549.4881m/z	549.488	7.93232	pos	DG(14:1(9Z)/18:0/0:0)	LMGL02010407	Glycerolipids	Diradylglycerols	Diacylglycerols	DG			39.9	9.71	M+H-H2O	C35H66O5	0.700434	254331	244724	213678	220972	349827	362382	261933	294773	248851	274678	424528	311375
10.15_585.4514m/z	585.451	10.1515	pos	DG(14:1(9Z)/18:2(9Z,12Z)/0:0)	LMGL02010409	Glycerolipids	Diradylglycerols	Diacylglycerols	DG			45.6	41.4	M+Na	C35H62O5	4.45023	168655	150407	144315	146139	72695.9	81234.9	98798.5	90943.3	217628	205472	183473	175591
3.39_578.4778m/z	578.478	3.39308	pos	DG(14:1(9Z)/18:3(9Z,12Z,15Z)/0:0)	LMGL02010410	Glycerolipids	Diradylglycerols	Diacylglycerols	DG			39.4	3.23	M+NH4	C35H60O5	-0.106247	87316.7	104595	90424.9	98490.4	52901	118403	67970.3	81098.1	161732	156248	221219	78018.4
11.09_577.5189m/z	577.519	11.0884	pos	DG(14:1(9Z)/20:0/0:0)	LMGL02010412	Glycerolipids	Diradylglycerols	Diacylglycerols	DG			36.5	0	M+H-H2O	C37H70O5	-0.304837	42525.8	63777.7	46721.6	54335.7	31906.4	56086	32031	55429.5	33875.3	43228.1	74346.6	53104.5
10.68_575.5034m/z	575.503	10.6789	pos	DG(14:1(9Z)/20:1(11Z)/0:0)	LMGL02010413	Glycerolipids	Diradylglycerols	Diacylglycerols	DG			39.1	7.6	M+H-H2O	C37H68O5	-0.036619	616574	629367	682739	603466	434223	525769	400698	628838	501057	600350	673177	692950
10.48_573.4878m/z	573.488	10.4772	pos	DG(14:1(9Z)/20:2(11Z,14Z)/0:0)	LMGL02010414	Glycerolipids	Diradylglycerols	Diacylglycerols	DG			38.7	5.72	M+H-H2O	C37H66O5	0.0561621	434120	417151	442734	430151	282662	329801	270590	445170	408729	406319	529922	471280
10.37_571.4719m/z	571.472	10.3735	pos	DG(14:1(9Z)/20:3(8Z,11Z,14Z)/0:0)	LMGL02010415	Glycerolipids	Diradylglycerols	Diacylglycerols	DG			41.3	12.6	M+H-H2O	C37H64O5	-0.366715	961852	869802	985370	844466	489582	512487	446640	696661	971749	972109	1.29294e+06	1.00014e+06
7.07_604.4937m/z	604.494	7.0706	pos	DG(14:1(9Z)/20:4(5Z,8Z,11Z,14Z)/0:0)	LMGL02010416	Glycerolipids	Diradylglycerols	Diacylglycerols	DG			37.2	0	M+NH4	C37H62O5	0.275744	17898.1	16378.6	18817.2	24269.6	11610.9	5805.41	14409	17263.4	22429	19254.3	23734.9	7555.78
6.16_584.4446n	607.434	6.16475	pos	DG(14:1(9Z)/20:5(5Z,8Z,11Z,14Z,17Z)/0:0)	LMGL02010417	Glycerolipids	Diradylglycerols	Diacylglycerols	DG			41.4	17.4	M+Na, M+K, M+NH4, M+H	C37H60O5	0.814913	305728	302942	304873	292938	163478	112281	186727	176559	392109	455739	456222	295963
8.29_615.4966m/z	615.497	8.2908	neg	DG(14:1(9Z)/22:3(10Z,13Z,16Z)/0:0)	LMGL02010422	Glycerolipids	Diradylglycerols	Diacylglycerols	DG			36.6	0	M-H	C39H68O5	-4.55811	272275	320284	301994	288696	267539	259872	317194	280242	279324	309286	292648	316377
10.37_597.4882m/z	597.488	10.3735	pos	DG(14:1(9Z)/22:4(7Z,10Z,13Z,16Z)/0:0)	LMGL02010423	Glycerolipids	Diradylglycerols	Diacylglycerols	DG			36.5	0	M+H-H2O	C39H66O5	0.79251	13457.8	20666.6	20930.3	22888.7	13901.4	22794.8	26955.9	20392.5	12525.1	6137.85	18048.9	17504.5
5.04_595.4727m/z	595.473	5.04118	pos	DG(14:1(9Z)/22:5(7Z,10Z,13Z,16Z,19Z)/0:0)	LMGL02010424	Glycerolipids	Diradylglycerols	Diacylglycerols	DG			39	4.17	M+H-H2O	C39H64O5	0.932314	103926	97562.9	102035	101219	64891.6	99684.1	102651	111219	151306	107611	105235	117191
3.83_611.4672m/z	611.467	3.83228	pos	DG(14:1(9Z)/22:6(4Z,7Z,10Z,13Z,16Z,19Z)/0:0)	LMGL02010425	Glycerolipids	Diradylglycerols	Diacylglycerols	DG			37	0	M+H	C39H62O5	0.38314	23479.9	24614.6	26380.2	19795.6	23489.9	38172.5	20784.6	30945.9	26772.2	23247.1	22008.5	25657
7.91_551.5037m/z	551.504	7.9107	pos	DG(16:0/16:0/0:0)	LMGL02010009	Glycerolipids	Diradylglycerols	Diacylglycerols	DG		C00165	41.2	11.8	M+H-H2O	C35H68O5	0.522183	306219	292371	253440	235139	483861	642599	402364	537510	248582	355536	354443	347364
7.31_549.4877m/z	549.488	7.31388	pos	DG(16:0/16:1(9Z)/0:0)	LMGL02010010	Glycerolipids	Diradylglycerols	Diacylglycerols	DG		C00165	40.8	12.8	M+H-H2O	C35H66O5	-0.0907003	268784	236991	229468	213638	286033	465289	258776	384616	260685	361186	441660	400171
7.97_577.5191m/z	577.519	7.97443	pos	DG(16:0/18:1(11Z)/0:0)	LMGL02010307	Glycerolipids	Diradylglycerols	Diacylglycerols	DG		C00165	46.3	34	M+H-H2O	C37H70O5	0.186605	6.86219e+06	6.98513e+06	6.92171e+06	7.18688e+06	5.26389e+06	6.72144e+06	6.1148e+06	7.86088e+06	6.3672e+06	6.74245e+06	8.58865e+06	7.46986e+06
7.62_577.5192m/z	577.519	7.62245	pos	DG(16:0/18:1(9Z)/0:0)	LMGL02010006	Glycerolipids	Diradylglycerols	Diacylglycerols	DG		C13861	37.3	0	M+H-H2O	C37H70O5	0.314899	48548.3	58790.6	55031.7	53342.1	35912	52094.7	47282.8	51884.6	33553.6	53645.1	77748.9	71713
6.78_575.5037m/z	575.504	6.78392	pos	DG(16:0/18:2(9Z,12Z)/0:0)	LMGL02010027	Glycerolipids	Diradylglycerols	Diacylglycerols	DG			49.5	52.3	M+H-H2O	C37H68O5	0.48457	616653	625136	595287	628022	506567	600383	525841	716963	676619	622375	847476	788359
10.66_613.4824m/z	613.482	10.6593	pos	DG(16:0/18:3(9Z,12Z,15Z)/0:0)	LMGL02010032	Glycerolipids	Diradylglycerols	Diacylglycerols	DG			50.8	62.3	M+Na	C37H66O5	3.63156	650456	690198	690445	676766	462869	502802	707096	531347	746216	679170	672402	656211
10.46_603.5346m/z	603.535	10.4565	pos	DG(16:0/20:2(11Z,14Z)/0:0)	LMGL02010055	Glycerolipids	Diradylglycerols	Diacylglycerols	DG			37.1	0	M+H-H2O	C39H72O5	-0.116985	946560	908904	1.02482e+06	1.0322e+06	925538	929272	1.00048e+06	1.1657e+06	963055	942260	931846	900525
9.57_617.5124m/z	617.512	9.57268	neg	DG(16:0/20:3(8Z,11Z,14Z)/0:0)	LMGL02010062	Glycerolipids	Diradylglycerols	Diacylglycerols	DG			36.8	0	M-H	C39H70O5	-4.3308	29854.7	36007.1	35275.6	35467.1	51539.4	39252.6	40197.5	33062.1	28261.7	38945.9	36955	35325.7
8.05_615.4964m/z	615.496	8.05335	neg	DG(16:0/20:4(5Z,8Z,11Z,14Z)/0:0)	LMGL02010070	Glycerolipids	Diradylglycerols	Diacylglycerols	DG			36.6	0.98	M-H	C39H68O5	-4.83204	41341.2	38166.5	36813.2	37339.5	43690.8	39844.2	50224.2	28371.5	40682.8	45642.5	49983.5	42048.8
10.54_594.5225n	617.513	10.5377	pos	DG(16:1(9Z)/18:0/0:0)	LMGL02010023	Glycerolipids	Diradylglycerols	Diacylglycerols	DG			51	66.3	M+NH4, M+Na, M+H-H2O	C37H70O5	0.297377	2.24994e+06	2.39298e+06	2.39991e+06	2.28643e+06	2.46034e+06	2.32412e+06	2.55012e+06	2.5148e+06	2.06368e+06	2.15601e+06	2.05755e+06	2.20473e+06
7.97_575.5037m/z	575.504	7.97443	pos	DG(16:1(9Z)/18:1(9Z)/0:0)	LMGL02010026	Glycerolipids	Diradylglycerols	Diacylglycerols	DG			47.3	44.5	M+H-H2O	C37H68O5	0.481867	1.3033e+06	1.31996e+06	1.25211e+06	1.31824e+06	1.11744e+06	1.18427e+06	1.1389e+06	1.30827e+06	1.55376e+06	1.86901e+06	1.74093e+06	1.6387e+06
9.88_590.4911n	613.48	9.88118	pos	DG(16:1(9Z)/18:2(9Z,12Z)/0:0)	LMGL02010031	Glycerolipids	Diradylglycerols	Diacylglycerols	DG			47	37.4	M+Na, M+K, M+NH4, M+H, M+H-H2O	C37H66O5	0.085449	5.08225e+06	5.09614e+06	5.03739e+06	5.15905e+06	6.16359e+06	5.81984e+06	6.50278e+06	5.85443e+06	4.91796e+06	4.81252e+06	4.52029e+06	5.0243e+06
5.94_571.4722m/z	571.472	5.94473	pos	DG(16:1(9Z)/18:3(9Z,12Z,15Z)/0:0)	LMGL02010035	Glycerolipids	Diradylglycerols	Diacylglycerols	DG			51	64.6	M+H-H2O	C37H64O5	0.133154	769102	726064	757071	761250	692449	649842	641592	688411	889136	1.01282e+06	1.05364e+06	1.08752e+06
8.90_639.4958m/z	639.496	8.89705	pos	DG(16:1(9Z)/20:3(8Z,11Z,14Z)/0:0)	LMGL02010069	Glycerolipids	Diradylglycerols	Diacylglycerols	DG			37.1	0	M+Na	C39H68O5	-0.115309	441648	450416	470132	447042	433170	441041	466978	482649	468174	465377	441304	428912
5.11_597.4880m/z	597.488	5.1075	pos	DG(16:1(9Z)/20:4(5Z,8Z,11Z,14Z)/0:0)	LMGL02010077	Glycerolipids	Diradylglycerols	Diacylglycerols	DG			38	0	M+H-H2O	C39H66O5	0.418539	47780.4	44804.9	44131.6	39861.4	26864.5	45728.1	41434.5	43643.8	35895.6	36593.9	60856.8	36702.5
10.31_613.4828m/z	613.483	10.3133	pos	DG(16:1(9Z)/20:5(5Z,8Z,11Z,14Z,17Z)/0:0)	LMGL02010086	Glycerolipids	Diradylglycerols	Diacylglycerols	DG			37.7	0	M+H	C39H64O5	0.29333	49473.8	76365.7	65078.1	76623.7	34297.8	26485.2	63703.9	17910.3	57460.8	61663.6	59333.1	56937.2
10.88_619.5280m/z	619.528	10.8836	pos	DG(18:0/16:0/0:0)	LMGL02010003	Glycerolipids	Diradylglycerols	Diacylglycerols	DG		C00165	45.1	58	M+Na	C37H72O5	1.36503	371306	391786	400666	362821	502729	556131	420075	510848	351694	353582	321750	394539
11.21_607.5659m/z	607.566	11.2106	pos	DG(18:0/18:0/0:0)	LMGL02010002	Glycerolipids	Diradylglycerols	Diacylglycerols	DG			36.1	0	M+H-H2O	C39H76O5	-0.158336	42846	43668.6	46422.9	49514	75471.9	82149.6	65068.4	70931.9	52403.5	71565.4	72563.3	81314.7
11.23_624.5693n	647.559	11.2299	pos	DG(18:0/18:0/0:0)	LMGL02010037	Glycerolipids	Diradylglycerols	Diacylglycerols	DG			38	0	M+NH4, M+Na	C39H76O5	0.0757934	265277	230075	242128	233388	333368	340618	307137	261121	254131	310910	333445	334183
15.95_605.5501m/z	605.55	15.9539	pos	DG(18:0/18:1(9Z)/0:0)	LMGL02010043	Glycerolipids	Diradylglycerols	Diacylglycerols	DG			36.3	0	M+H-H2O	C39H74O5	-0.32694	260363	257287	249182	264637	222132	203923	251407	271034	248210	254648	254167	252516
10.25_638.5720m/z	638.572	10.2535	pos	DG(18:0/18:2(9Z,12Z)/0:0)	LMGL02010050	Glycerolipids	Diradylglycerols	Diacylglycerols	DG			46.8	39.6	M+NH4	C39H72O5	0.279719	1.33344e+07	1.33955e+07	1.45902e+07	1.37409e+07	1.35805e+07	1.39869e+07	1.42438e+07	1.40239e+07	1.29122e+07	1.31257e+07	1.2896e+07	1.28278e+07
10.46_618.5222n	636.556	10.4565	pos	DG(18:0/18:3(9Z,12Z,15Z)/0:0)	LMGL02010057	Glycerolipids	Diradylglycerols	Diacylglycerols	DG			51.8	70.8	M+H, M+NH4	C39H70O5	-0.228531	1.0653e+07	1.0623e+07	1.14891e+07	1.08842e+07	1.08872e+07	1.08771e+07	1.11552e+07	1.14085e+07	1.02874e+07	1.03079e+07	1.01149e+07	1.03061e+07
10.82_625.5167m/z	625.517	10.82	pos	DG(18:0/20:5(5Z,8Z,11Z,14Z,17Z)/0:0)	LMGL02010122	Glycerolipids	Diradylglycerols	Diacylglycerols	DG			50.7	71.8	M+H-H2O	C41H70O5	-3.60055	4.81388e+06	4.93768e+06	5.25048e+06	4.99786e+06	5.03117e+06	5.19143e+06	5.35871e+06	5.60672e+06	4.74989e+06	4.5631e+06	4.56572e+06	4.39574e+06
10.90_577.5191m/z	577.519	10.9031	pos	DG(18:1(11E)/16:0/0:0)	LMGL02010004	Glycerolipids	Diradylglycerols	Diacylglycerols	DG			45.8	33.4	M+H-H2O	C37H70O5	0.084055	891806	913360	809788	957282	563273	629376	550151	810909	746886	742847	1.02554e+06	928577
11.33_577.5192m/z	577.519	11.3299	pos	DG(18:1(9Z)/16:0/0:0)	LMGL02010005	Glycerolipids	Diradylglycerols	Diacylglycerols	DG			44.1	34.5	M+H-H2O	C37H70O5	0.226349	180109	182765	168155	195623	212500	237965	138953	223974	115498	162513	241898	224171
10.78_643.5274m/z	643.527	10.7812	pos	DG(18:1(9Z)/18:1(9Z)/0:0)	LMGL02010049	Glycerolipids	Diradylglycerols	Diacylglycerols	DG			46.7	38.7	M+Na	C39H72O5	0.322667	2.20058e+06	2.10788e+06	2.42486e+06	2.15736e+06	2.14722e+06	2.31043e+06	2.24632e+06	2.44306e+06	2.08837e+06	1.9986e+06	1.9159e+06	1.96732e+06
10.25_641.5114m/z	641.511	10.2535	pos	DG(18:1(9Z)/18:2(9Z,12Z)/0:0)	LMGL02010056	Glycerolipids	Diradylglycerols	Diacylglycerols	DG			44.9	34.9	M+Na	C39H70O5	-0.237455	2.98733e+06	2.92547e+06	3.16636e+06	2.87409e+06	3.04643e+06	3.13321e+06	3.24928e+06	3.26639e+06	2.84662e+06	2.82155e+06	2.61188e+06	2.70803e+06
6.34_599.5037m/z	599.504	6.34228	pos	DG(18:1(9Z)/18:3(9Z,12Z,15Z)/0:0)	LMGL02010064	Glycerolipids	Diradylglycerols	Diacylglycerols	DG			49.1	57.1	M+H-H2O	C39H68O5	0.570454	438035	440847	435705	460242	294101	422250	436021	352360	621833	650132	611384	596071
10.56_642.5200n	643.527	10.5593	pos	DG(18:1(9Z)/20:4(5Z,8Z,11Z,14Z)/0:0)	LMGL02010121	Glycerolipids	Diradylglycerols	Diacylglycerols	DG			41.4	19.5	M+H, M+K	C41H70O5	-3.57088	2.67933e+06	2.66584e+06	3.01536e+06	2.8789e+06	2.855e+06	2.85958e+06	3.11318e+06	3.14659e+06	2.66859e+06	2.63855e+06	2.48622e+06	2.527e+06
10.52_639.4961m/z	639.496	10.5176	pos	DG(18:2(9Z,12Z)/18:2(9Z,12Z)/0:0)	LMGL02010063	Glycerolipids	Diradylglycerols	Diacylglycerols	DG		C00165	37.1	0	M+Na	C39H68O5	0.402141	226627	213912	229509	217059	261056	248661	265142	274760	210212	242717	233252	234546
5.62_597.4880m/z	597.488	5.61687	pos	DG(18:2(9Z,12Z)/18:3(9Z,12Z,15Z)/0:0)	LMGL02010071	Glycerolipids	Diradylglycerols	Diacylglycerols	DG			49.4	54	M+H-H2O	C39H66O5	0.417407	443167	441956	415817	412165	284081	399102	408704	382653	630757	751802	555544	585247
10.03_666.6031m/z	666.603	10.0275	pos	DG(18:2(9Z,12Z)/20:0/0:0)	LMGL02010089	Glycerolipids	Diradylglycerols	Diacylglycerols	DG			37.1	0	M+NH4	C41H76O5	-0.0563036	38302.2	20825.8	38567.6	22550.3	36780	32217.5	47104.2	27957.8	37038.9	14740.3	20869.9	33744.1
10.64_694.6335m/z	694.634	10.6378	pos	DG(18:2(9Z,12Z)/22:0/0:0)	LMGL02010168	Glycerolipids	Diradylglycerols	Diacylglycerols	DG			47.8	53.6	M+NH4	C43H80O5	-1.29395	814740	760756	892801	786005	1.04319e+06	843130	891897	947476	655320	665142	594810	728138
7.95_591.4983m/z	591.498	7.95288	pos	DG(18:3(6Z,9Z,12Z)/16:0/0:0)	LMGL02010474	Glycerolipids	Diradylglycerols	Diacylglycerols	DG			54.7	82.6	M+H	C37H66O5	0.0810135	370130	365405	336170	360668	385582	332255	445263	349549	425992	358383	339646	349038
9.14_588.4753n	611.464	9.1393	pos	DG(18:3(6Z,9Z,12Z)/16:1(9Z)/0:0)	LMGL02010475	Glycerolipids	Diradylglycerols	Diacylglycerols	DG			47.6	44.6	M+Na, M+K, M+NH4, M+H	C37H64O5	-0.188918	780670	729649	728304	725221	750638	866300	1.0095e+06	935887	542458	543938	511731	603617
9.90_641.5117m/z	641.512	9.90072	pos	DG(18:3(6Z,9Z,12Z)/18:0/0:0)	LMGL02010479	Glycerolipids	Diradylglycerols	Diacylglycerols	DG			47.1	51.4	M+Na	C39H70O5	0.265819	860131	859540	990335	858504	805350	822749	901160	930612	908997	841276	766172	833960
9.86_616.5067n	634.54	9.86045	pos	DG(18:3(6Z,9Z,12Z)/18:1(9Z)/0:0)	LMGL02010480	Glycerolipids	Diradylglycerols	Diacylglycerols	DG			43.4	28.1	M+NH4, M+Na, M+H, M+H-H2O	C39H68O5	-0.0391191	2.98563e+06	2.98522e+06	2.95974e+06	2.92583e+06	3.70229e+06	3.24249e+06	3.96837e+06	3.41495e+06	2.77543e+06	2.44752e+06	2.39942e+06	2.59105e+06
6.03_615.4982m/z	615.498	6.0316	pos	DG(18:3(6Z,9Z,12Z)/18:2(9Z,12Z)/0:0)	LMGL02010481	Glycerolipids	Diradylglycerols	Diacylglycerols	DG			43	29.3	M+H	C39H66O5	-0.224661	81301.7	84180.7	79595.4	70511.3	68256.2	65652.1	60675.6	89102.8	77467.9	97757.1	69432.3	85700.1
7.27_612.4733n	635.463	7.26813	pos	DG(18:3(6Z,9Z,12Z)/18:3(6Z,9Z,12Z)/0:0)	LMGL02010328	Glycerolipids	Diradylglycerols	Diacylglycerols	DG			47.2	52.7	M+Na, M+K	C39H64O5	-3.33504	1.04524e+06	1.03506e+06	1.08337e+06	1.04224e+06	1.19107e+06	897109	1.24226e+06	1.09242e+06	1.11511e+06	999413	848623	902858
5.35_612.4753n	613.483	5.34963	pos	DG(18:3(6Z,9Z,12Z)/18:3(9Z,12Z,15Z)/0:0)	LMGL02010482	Glycerolipids	Diradylglycerols	Diacylglycerols	DG			46.2	33	M+H, M+NH4, M+H-H2O	C39H64O5	-0.157287	1.1799e+06	1.2656e+06	1.16463e+06	1.21339e+06	1.19384e+06	1.1619e+06	1.25659e+06	1.18439e+06	1.79685e+06	1.66101e+06	1.53521e+06	1.75028e+06
11.09_613.4829m/z	613.483	11.0884	pos	DG(18:3(9Z,12Z,15Z)/18:3(9Z,12Z,15Z)/0:0)	LMGL02010079	Glycerolipids	Diradylglycerols	Diacylglycerols	DG			39.3	3.31	M+H	C39H64O5	0.338161	146726	135629	123891	134089	124861	128210	158258	87502.3	189118	177811	167414	170737
0.58_685.5192m/z	685.519	0.5781	pos	DG(18:3(9Z,12Z,15Z)/20:0/0:0)	LMGL02010098	Glycerolipids	Diradylglycerols	Diacylglycerols	DG			41.7	22.7	M+K	C41H74O5	3.74249	53978.1	74947.3	45211.2	43018.8	85566.6	45829.4	62581.3	32337.7	92157.9	154534	11872.7	240617
5.59_588.4754n	571.472	5.59423	pos	DG(18:4(6Z,9Z,12Z,15Z)/16:0/0:0)	LMGL02010498	Glycerolipids	Diradylglycerols	Diacylglycerols	DG			45.3	30.9	M+H-H2O, M+Na	C37H64O5	0.0921896	1.83915e+06	1.75862e+06	1.77456e+06	1.82907e+06	1.16685e+06	1.695e+06	1.28967e+06	1.68276e+06	2.20939e+06	2.18948e+06	2.81006e+06	2.283e+06
8.24_609.4517m/z	609.452	8.23652	pos	DG(18:4(6Z,9Z,12Z,15Z)/16:1(9Z)/0:0)	LMGL02010499	Glycerolipids	Diradylglycerols	Diacylglycerols	DG			49.7	59.6	M+Na	C37H62O5	4.62623	271515	277777	285711	276674	562519	516518	489292	358659	85965	119323	213749	154160
8.48_614.4912n	637.48	8.47892	pos	DG(18:4(6Z,9Z,12Z,15Z)/18:1(9Z)/0:0)	LMGL02010504	Glycerolipids	Diradylglycerols	Diacylglycerols	DG			45.9	34	M+Na, M+K, M+NH4, M+H, M+H-H2O	C39H66O5	0.222072	3.55104e+06	3.59308e+06	3.42382e+06	3.52914e+06	4.4371e+06	3.02507e+06	4.57701e+06	3.49586e+06	3.43287e+06	3.1556e+06	2.82566e+06	3.01935e+06
5.97_612.4759n	613.483	5.96612	pos	DG(18:4(6Z,9Z,12Z,15Z)/18:2(9Z,12Z)/0:0)	LMGL02010505	Glycerolipids	Diradylglycerols	Diacylglycerols	DG			47.4	40	M+H-H2O, M+H	C39H64O5	0.840368	820691	819844	807849	807654	790416	748908	1.01516e+06	773272	1.05361e+06	835943	770457	969014
15.95_720.6496m/z	720.65	15.9539	pos	DG(20:0/22:3(10Z,13Z,16Z)/0:0)	LMGL02010221	Glycerolipids	Diradylglycerols	Diacylglycerols	DG			37.8	0	M+NH4	C45H82O5	-0.687597	36791	37387.6	44297.7	20594.7	33103.7	19342.9	31108.3	35538.3	20275.9	31759	16494.5	25186.1
11.37_720.6499m/z	720.65	11.3705	pos	DG(20:3(8Z,11Z,14Z)/22:0/0:0)	LMGL02010228	Glycerolipids	Diradylglycerols	Diacylglycerols	DG			37.3	0	M+NH4	C45H82O5	-0.202528	42133.3	30830.1	33184.7	33385.5	65041.4	51200.2	71390.9	38845.2	36297.5	39717.7	38393.1	41960.8
11.27_750.6959m/z	750.696	11.2686	pos	DG(22:1(13Z)/22:1(13Z)/0:0)	LMGL02010271	Glycerolipids	Diradylglycerols	Diacylglycerols	DG			36.7	0	M+NH4	C47H88O5	-1.49439	592055	595030	606207	573296	628144	585393	542770	642425	521252	572237	531212	596108
4.36_742.6375m/z	742.638	4.36147	pos	DG(22:3(10Z,13Z,16Z)/22:3(10Z,13Z,16Z)/0:0)	LMGL02010282	Glycerolipids	Diradylglycerols	Diacylglycerols	DG			36.1	0	M+NH4	C47H80O5	4.28366	17893.7	20331.9	9550.06	23929.4	17801	20126.3	19785.3	14850.5	21485	25971.2	19606.7	22586.2
7.78_711.4989m/z	711.499	7.78268	neg	DG(22:6(4Z,7Z,10Z,13Z,16Z,19Z)/22:6(4Z,7Z,10Z,13Z,16Z,19Z)/0:0)	LMGL02010306	Glycerolipids	Diradylglycerols	Diacylglycerols	DG			39	12.6	M-H	C47H68O5	-0.76494	14869.7	15996.2	14952.9	14625.7	8959.82	13730.9	12538	18432.3	20438.7	15572.7	19956.1	19569.7
10.13_756.5751n	779.564	10.1323	pos	MGDG(16:0/18:1(9Z))	LMGL05010025	Glycerolipids	Glycosyldiradylglycerols	Glycosyldiacylglycerols	MGDG			51.1	62.8	M+NH4, M+Na	C43H80O10	-0.0398086	862674	876087	829972	856386	1.09781e+06	1.0153e+06	922024	1.31721e+06	952442	937750	907339	885670
9.29_754.5597n	777.549	9.29417	pos	MGDG(16:0/18:2(9Z,12Z))	LMGL05010026	Glycerolipids	Glycosyldiradylglycerols	Glycosyldiacylglycerols	MGDG			48.4	47.7	M+NH4, M+Na	C43H78O10	0.226725	923279	965921	872876	885428	829310	736727	748360	938181	997962	990732	902212	933981
7.95_796.5934m/z	796.593	7.95288	pos	MGDG(18:2(9Z,12Z)/18:2(9Z,12Z))	LMGL05010023	Glycerolipids	Glycosyldiradylglycerols	Glycosyldiacylglycerols	MGDG			46.7	37.2	M+NH4	C45H78O10	0.108282	1.55941e+06	1.55187e+06	1.47793e+06	1.55788e+06	1.5777e+06	1.26633e+06	1.8635e+06	1.40362e+06	1.59081e+06	1.33448e+06	1.25235e+06	1.58601e+06
6.81_776.5440n	799.533	6.80548	pos	MGDG(18:2(9Z,12Z)/18:3(9Z,12Z,15Z))	LMGL05010024	Glycerolipids	Glycosyldiradylglycerols	Glycosyldiacylglycerols	MGDG			52.9	69.6	M+Na, M+K, M+NH4	C45H76O10	0.135184	1.43686e+06	1.54758e+06	1.38308e+06	1.39617e+06	1.54089e+06	1.32824e+06	1.72156e+06	1.40599e+06	1.72987e+06	1.37611e+06	1.34998e+06	1.60795e+06
4.49_784.5558m/z	784.556	4.49233	pos	MGDG(18:3((9Z,12Z,15Z)/16:0)	LMGL05010029	Glycerolipids	Glycosyldiradylglycerols	Glycosyldiacylglycerols	MGDG			38	1.59	M+NH4	C43H74O11	-1.52844	62788	65550.6	65718.5	73641.1	99251.4	152932	111479	125843	26722.9	30402.3	32658.1	55279.7
5.17_746.4966n	769.486	5.1721	pos	MGDG(18:3(9Z,12Z,15Z)/16:3(7Z,10Z,13Z))	LMGL05010019	Glycerolipids	Glycosyldiradylglycerols	Glycosyldiacylglycerols	MGDG			54.1	72.1	M+Na, M+K, M+NH4	C43H70O10	-0.338851	2.07064e+07	2.00559e+07	2.00743e+07	2.00372e+07	1.39124e+07	1.29181e+07	1.83692e+07	1.38697e+07	2.95738e+07	2.45997e+07	2.23158e+07	2.4696e+07
5.97_774.5281n	797.517	5.96612	pos	MGDG(18:3(9Z,12Z,15Z)/18:3(9Z,12Z,15Z))	LMGL05010001	Glycerolipids	Glycosyldiradylglycerols	Glycosyldiacylglycerols	MGDG			53	66.7	M+Na, M+K, M+NH4	C45H74O10	-0.123347	1.17539e+07	1.14612e+07	1.11536e+07	1.13228e+07	1.05915e+07	9.87538e+06	1.15131e+07	1.00357e+07	1.52356e+07	1.43559e+07	1.30959e+07	1.36935e+07
6.65_773.5178m/z	773.518	6.65137	pos	MGDG(18:3(9Z,12Z,15Z)/18:4(6Z,9Z,12Z,15Z))	LMGL05010014	Glycerolipids	Glycosyldiradylglycerols	Glycosyldiacylglycerols	MGDG			50	62	M+H	C45H72O10	-2.62584	565774	554533	528718	543393	397712	365401	435012	415116	689688	581962	562145	626060
5.41_761.4858m/z	761.486	5.40853	neg	SQDG(16:0/14:0)	LMGL05010005	Glycerolipids	Glycosyldiradylglycerols	Glycosyldiacylglycerols	SQDG			36.6	0	M-H2O-H	C40H76O12S	-2.70202	1724.54	1859.5	2042.74	1853.19	760.447	1229.35	1694.06	617.34	2527.36	1525.62	2353.06	2344.44
7.27_812.5553m/z	812.555	7.26813	pos	SQDG(16:0/16:0)	LMGL05010004	Glycerolipids	Glycosyldiradylglycerols	Glycosyldiacylglycerols	SQDG			49.7	58.4	M+NH4	C41H78O12S	0.143183	406817	460795	394821	387800	616956	616473	595402	551228	335486	482942	464764	582881
4.84_791.4969m/z	791.497	4.84288	neg	SQDG(16:0/16:1(9Z))	LMGL05010006	Glycerolipids	Glycosyldiradylglycerols	Glycosyldiacylglycerols	SQDG			38.4	0	M-H	C41H76O12S	-1.97551	358277	253367	313234	242580	201558	189016	269236	189161	370227	353656	359317	369360
5.02_858.5397m/z	858.54	5.01917	pos	SQDG(22:5(5Z,8Z,11Z,14Z,17Z)/16:1(13Z))	LMGL05010009	Glycerolipids	Glycosyldiradylglycerols	Glycosyldiacylglycerols	SQDG			45.7	34.2	M+NH4	C45H76O12S	0.2031	620727	648627	639324	611775	603751	724260	892006	674973	756486	771481	687816	642783
0.91_572.3080m/z	572.308	0.905717	pos	SQMG(16:1(9Z)/0:0)	LMGL04010002	Glycerolipids	Glycosylmonoradylglycerols	Glycosylmonoacylglycerols	SQMG			36.8	0	M+NH4	C25H46O11S	-3.44323	3988.35	2355.65	4066.93	3981.55	3771.72	1898.2	1971.29	6015.96	4684.49	3037.06	3800.27	3772.4
17.49_330.2769n	313.274	17.4905	pos	MG(0:0/16:0/0:0)	LMGL01010025	Glycerolipids	Monoradylglycerols	Monoacylglycerols	MG			39.8	3.49	M+H-H2O, M+H	C19H38O4	-0.464611	791622	753487	770792	691975	827406	846205	846615	854053	717274	747382	711501	706017
4.14_379.2818m/z	379.282	4.14198	pos	MG(0:0/18:1(9Z)/0:0)	LMGL01010024	Glycerolipids	Monoradylglycerols	Monoacylglycerols	MG			47.1	42.8	M+Na	C21H40O4	-0.335986	634593	660454	716494	643744	594608	610302	715200	654688	689655	673878	630449	646456
15.81_337.2735m/z	337.273	15.8114	pos	MG(0:0/18:2(9Z,12Z)/0:0)	LMGL01010033	Glycerolipids	Monoradylglycerols	Monoacylglycerols	MG			37.5	0	M+H-H2O	C21H38O4	-0.649771	65388.8	63391.7	71216.1	73270	69287.5	70018.3	66389.1	67734	69593.2	60535.1	66534.5	59206.4
2.17_313.2738m/z	313.274	2.1732	pos	MG(16:0/0:0/0:0)	LMGL01010009	Glycerolipids	Monoradylglycerols	Monoacylglycerols	MG			39.9	2.63	M+H-H2O	C19H38O4	0.285605	6893.38	6644.95	6552.08	6841.16	6038.53	7479.18	6011.15	8386.29	6734.81	6126.81	7402.39	6747.35
4.36_358.3081n	381.297	4.36147	pos	MG(18:0/0:0/0:0)	LMGL01010003	Glycerolipids	Monoradylglycerols	Monoacylglycerols	MG			40.7	9.28	M+H-H2O, M+Na	C21H42O4	-0.682251	92241.5	90483.6	103031	87170.7	74517.5	83152.1	94041.6	71453.8	123345	97062.6	92268.5	85687
10.25_357.2996m/z	357.3	10.2535	pos	MG(18:1(11E)/0:0/0:0)	LMGL01010004	Glycerolipids	Monoradylglycerols	Monoacylglycerols	MG			49.7	56.7	M+H	C21H40O4	-0.805664	1.7119e+06	1.56324e+06	1.63086e+06	1.58175e+06	1.69047e+06	1.67715e+06	1.7828e+06	1.87386e+06	1.5709e+06	1.57478e+06	1.46142e+06	1.50408e+06
15.95_357.2998m/z	357.3	15.9539	pos	MG(18:1(9Z)/0:0/0:0)	LMGL01010005	Glycerolipids	Monoradylglycerols	Monoacylglycerols	MG			48.2	46.2	M+H	C21H40O4	-0.421985	7.86902e+06	7.5388e+06	7.67977e+06	7.136e+06	7.97332e+06	8.04595e+06	8.41451e+06	8.43792e+06	7.40543e+06	7.26251e+06	7.01906e+06	6.98312e+06
0.32_355.2840m/z	355.284	0.31715	pos	MG(18:2(9Z,12Z)/0:0/0:0)	LMGL01010006	Glycerolipids	Monoradylglycerols	Monoacylglycerols	MG			38.3	0	M+H	C21H38O4	-0.758534	18270.4	17240.1	17675.4	17299.5	17876.7	18434.8	19338.5	21395.7	16626.1	17381.6	16427.8	17295.8
11.00_638.5484n	656.582	11.0049	pos	TG(12:0/12:0/12:0)	LMGL03012618	Glycerolipids	Triradylglycerols	Triacylglycerols	TG			37.2	0.351	M+NH4, M+Na	C39H74O6	-0.276492	44654.8	61426.7	71437.6	36490.7	46370.4	37825.4	190466	263400	68778.5	42636.8	21068.7	10549.7
12.23_667.5844m/z	667.584	12.2336	pos	TG(12:0/12:0/14:0)	LMGL03012628	Glycerolipids	Triradylglycerols	Triacylglycerols	TG			36.2	0	M+H	C41H78O6	-4.09928	185696	196928	220811	191415	170557	169206	204621	164091	199702	187839	210527	176733
14.06_738.6619m/z	738.662	14.0562	pos	TG(12:0/12:0/18:1(9Z))	LMGL03012638	Glycerolipids	Triradylglycerols	Triacylglycerols	TG			37.1	0	M+NH4	C45H84O6	1.83873	61326.2	60950.5	84084.4	77341.5	56278.5	54170	79452.6	73572.5	55172.4	76042.7	47970.8	38918.2
13.18_751.6774m/z	751.677	13.1784	pos	TG(12:0/12:0/20:0)	LMGL03012645	Glycerolipids	Triradylglycerols	Triacylglycerols	TG			36.7	0	M+H	C47H90O6	-4.81036	297776	283913	329451	325209	255259	354852	259561	353413	316552	317968	312881	288822
10.83_743.6168m/z	743.617	10.8287	neg	TG(12:0/12:0/20:3(8Z,11Z,14Z))	LMGL03012648	Glycerolipids	Triradylglycerols	Triacylglycerols	TG			37.7	0	M-H	C47H84O6	-3.66867	1.07468e+06	1.17803e+06	1.1824e+06	1.21003e+06	1.09732e+06	993186	987227	1.05631e+06	1.1292e+06	1.24413e+06	1.12991e+06	1.27103e+06
12.68_778.7046n	796.738	12.6759	pos	TG(12:0/12:0/22:0)	LMGL03012652	Glycerolipids	Triradylglycerols	Triacylglycerols	TG			36.5	0	M+NH4, M+Na	C49H94O6	-0.551916	234881	203110	290091	267832	205953	264602	345958	314161	265409	243062	193955	258577
13.47_777.6938m/z	777.694	13.4723	pos	TG(12:0/12:0/22:1(11Z))	LMGL03012653	Glycerolipids	Triradylglycerols	Triacylglycerols	TG			36.4	0	M+H	C49H92O6	-3.64449	200100	170843	199050	267567	135184	201976	214553	217176	195456	209194	239714	206063
11.35_773.6636m/z	773.664	11.3545	neg	TG(12:0/12:0/22:2(13Z,16Z))	LMGL03012654	Glycerolipids	Triradylglycerols	Triacylglycerols	TG			37.2	3.94	M-H	C49H90O6	-3.75632	32124.3	39672.3	36680.1	36022.3	40243.4	38739	32346.9	41510.1	30103.4	43942.2	34662.3	38618.9
11.17_771.6480m/z	771.648	11.1715	neg	TG(12:0/12:0/22:3(10Z,13Z,16Z))	LMGL03012655	Glycerolipids	Triradylglycerols	Triacylglycerols	TG			37.8	0	M-H	C49H88O6	-3.58202	431093	459742	471889	480024	438627	402147	390461	402381	432740	499609	477017	539807
10.81_769.6322m/z	769.632	10.8057	neg	TG(12:0/12:0/22:4(7Z,10Z,13Z,16Z))	LMGL03012656	Glycerolipids	Triradylglycerols	Triacylglycerols	TG			36.3	0	M-H	C49H86O6	-3.80173	101886	128678	134811	135479	100519	71235.5	74320.8	101075	127508	122832	133346	113694
12.32_768.7063m/z	768.706	12.3191	pos	TG(12:0/16:0/16:0)	LMGL03012664	Glycerolipids	Triradylglycerols	Triacylglycerols	TG			36.2	0	M+NH4	C47H90O6	-1.63473	101129	75368.5	101108	57383.9	79344.6	85194.5	130496	92469.6	97812.2	73749.9	91883.7	76540.2
13.51_779.7092m/z	779.709	13.5137	pos	TG(12:0/16:0/18:0)	LMGL03010007	Glycerolipids	Triradylglycerols	Triacylglycerols	TG			36.5	0	M+H	C49H94O6	-4.04711	424704	353396	428567	351259	286128	379477	394297	386185	438159	424090	360788	452763
11.65_783.6848m/z	783.685	11.6521	neg	TG(12:0/18:1(9Z)/18:1(9Z))	LMGL03012670	Glycerolipids	Triradylglycerols	Triacylglycerols	TG			37.3	0	M-H2O-H	C51H94O6	-3.04106	51895.3	56476.3	62768.6	59688.7	27397.7	48072.2	34097	41036.4	18482.9	57045.1	67570.6	51267.2
12.36_723.6471m/z	723.647	12.3614	pos	TG(14:0/14:0/14:0)	LMGL03012616	Glycerolipids	Triradylglycerols	Triacylglycerols	TG			36.8	0	M+H	C45H86O6	-3.58537	72917.1	51097.5	82665.8	89779.8	94731	64803.8	85969.1	80924.4	60278.4	67243.2	74195.9	85799.5
11.51_799.6799m/z	799.68	11.5147	neg	TG(14:0/14:0/20:3(8Z,11Z,14Z))	LMGL03012772	Glycerolipids	Triradylglycerols	Triacylglycerols	TG			37.4	2.79	M-H	C51H92O6	-2.8196	38509	40931.7	42485.5	45480.9	52747.6	35740.6	38087.9	44469.1	35170	38077.9	38803.7	55744.3
13.05_806.7360n	824.77	13.053	pos	TG(14:0/16:0/18:0)	LMGL03014225	Glycerolipids	Triradylglycerols	Triacylglycerols	TG			49.2	56	M+NH4, M+Na	C51H98O6	-0.461757	682059	693646	733104	661148	797629	732473	857700	791209	738267	758659	715208	784006
10.49_715.5854m/z	715.585	10.4868	neg	TG(14:1(9Z)/14:1(9Z)/14:1(9Z))	LMGL03012620	Glycerolipids	Triradylglycerols	Triacylglycerols	TG			38.5	0	M-H	C45H80O6	-3.96187	517484	501303	521081	503727	460853	435985	466427	499877	516034	551477	531946	580817
10.76_797.6082m/z	797.608	10.7603	neg	TG(14:1(9Z)/18:4(6Z,9Z,12Z,15Z)/18:4(6Z,9Z,12Z,15Z))	LMGL03012854	Glycerolipids	Triradylglycerols	Triacylglycerols	TG			37.9	0	M-H2O-H	C53H84O6	-0.968801	3176.38	4400.78	5350.97	3975.2	1942.29	9889.98	4194.62	5867.32	7685.1	6246.87	11597.7	9081.04
11.47_849.6395m/z	849.639	11.4691	neg	TG(14:1(9Z)/20:5(5Z,8Z,11Z,14Z,17Z)/20:5(5Z,8Z,11Z,14Z,17Z))	LMGL03012862	Glycerolipids	Triradylglycerols	Triacylglycerols	TG			37.1	0	M-H2O-H	C57H88O6	-0.919889	2772.2	5310.38	3168.24	2645.75	2281.3	4638.22	2664.22	4623.62	2454.99	5414	4226.37	5754.19
13.83_807.7401m/z	807.74	13.827	pos	TG(16:0/16:0/16:0)	LMGL03010001	Glycerolipids	Triradylglycerols	Triacylglycerols	TG			36.2	0	M+H	C51H98O6	-4.37345	360998	377195	478367	370917	393966	362112	341155	359691	291233	357898	365633	407288
12.68_804.7204n	822.754	12.6759	pos	TG(16:0/16:0/16:1(9Z))	LMGL03010017	Glycerolipids	Triradylglycerols	Triacylglycerols	TG			38.4	0	M+NH4, M+Na	C51H96O6	-0.308278	300805	236773	272782	277502	300894	316070	447004	352576	264847	330410	251999	359844
13.41_834.7674n	852.801	13.4093	pos	TG(16:0/16:0/18:0)	LMGL03010004	Glycerolipids	Triradylglycerols	Triacylglycerols	TG			53.1	73.4	M+NH4, M+Na	C53H102O6	-0.269777	855447	973886	945267	915337	1.16575e+06	1.14887e+06	1.15994e+06	1.1456e+06	917166	1.07847e+06	975782	1.11661e+06
13.03_832.7519n	850.786	13.0319	pos	TG(16:0/16:0/18:1(9Z))	LMGL03010006	Glycerolipids	Triradylglycerols	Triacylglycerols	TG	**	C00422	53.7	73.7	M+NH4, M+Na	C53H100O6	-0.0560359	660868	624161	681484	663173	799159	653757	895532	1.81743e+06	608806	1.01477e+06	556691	749325
12.40_820.7387m/z	820.739	12.4033	pos	TG(16:0/16:1(9Z)/16:1(9Z))	LMGL03010018	Glycerolipids	Triradylglycerols	Triacylglycerols	TG			38.2	0	M+NH4	C51H94O6	-0.170238	147430	150725	172321	144920	83497.3	122553	200161	163718	117293	136103	119817	141886
12.70_830.7365n	848.77	12.6968	pos	TG(16:0/16:1(9Z)/18:1(9Z))	LMGL03010043	Glycerolipids	Triradylglycerols	Triacylglycerols	TG			48.5	48.1	M+NH4, M+Na	C53H98O6	0.217578	547958	531129	522009	564100	754117	566622	753772	1.26919e+06	436568	672569	503305	608083
11.81_850.7051n	868.739	11.8112	pos	TG(16:0/16:1(9Z)/20:5(5Z,8Z,11Z,14Z,17Z))	LMGL03010215	Glycerolipids	Triradylglycerols	Triacylglycerols	TG			50.1	59.3	M+NH4, M+Na	C55H94O6	0.079103	1.73902e+06	1.64658e+06	1.64421e+06	1.70452e+06	2.176e+06	2.28251e+06	2.08616e+06	2.01013e+06	1.56023e+06	1.55024e+06	1.56443e+06	1.29924e+06
13.74_862.7984n	880.832	13.7437	pos	TG(16:0/18:0/18:0)	LMGL03010069	Glycerolipids	Triradylglycerols	Triacylglycerols	TG			55	80.7	M+NH4, M+Na	C55H106O6	-0.605167	896205	936136	903321	884410	1.32707e+06	1.23056e+06	1.25403e+06	1.08892e+06	932743	1.09387e+06	959917	1.07794e+06
13.39_860.7830n	878.817	13.3877	pos	TG(16:0/18:0/18:1(9Z))	LMGL03010085	Glycerolipids	Triradylglycerols	Triacylglycerols	TG			50.6	61.4	M+NH4, M+Na	C55H104O6	-0.328669	287644	394473	409098	377602	465610	574825	890277	1.12251e+06	328913	452857	377454	464329
13.01_858.7654n	876.799	13.0117	pos	TG(16:0/18:1(9Z)/18:1(9Z))	LMGL03010100	Glycerolipids	Triradylglycerols	Triacylglycerols	TG			51.6	63.1	M+NH4, M+Na	C55H102O6	-2.56462	1.15162e+06	1.14369e+06	1.15718e+06	1.18132e+06	1.14679e+06	985239	1.48225e+06	5.80663e+06	966217	1.16246e+06	802861	1.28552e+06
12.70_856.7520n	874.786	12.6968	pos	TG(16:0/18:1(9Z)/18:2(9Z,12Z))	LMGL03010121	Glycerolipids	Triradylglycerols	Triacylglycerols	TG			47.9	60.2	M+NH4, M+Na	C55H100O6	0.00272523	1.13238e+06	1.17217e+06	1.17089e+06	1.1187e+06	1.40969e+06	991434	1.18576e+06	2.93702e+06	798469	922851	778225	1.13196e+06
12.72_886.7993n	904.833	12.7172	pos	TG(16:0/18:1(9Z)/20:1(11Z))	LMGL03010234	Glycerolipids	Triradylglycerols	Triacylglycerols	TG			49.6	57.8	M+NH4, M+Na	C57H106O6	0.398251	1.41237e+06	1.47002e+06	1.62367e+06	1.46163e+06	1.35681e+06	1.41681e+06	1.47911e+06	1.45707e+06	1.45703e+06	1.40609e+06	1.36885e+06	1.39566e+06
12.38_854.7368n	872.771	12.3823	pos	TG(16:0/18:2(9Z,12Z)/18:2(9Z,12Z))	LMGL03010141	Glycerolipids	Triradylglycerols	Triacylglycerols	TG			54	76.3	M+NH4, M+K	C55H98O6	0.562085	1.54112e+06	1.44861e+06	1.49016e+06	1.45432e+06	1.91803e+06	1.83089e+06	1.76144e+06	1.99813e+06	1.35584e+06	1.34883e+06	1.46274e+06	1.36755e+06
12.09_852.7203n	870.754	12.0863	pos	TG(16:0/18:2(9Z,12Z)/18:3(9Z,12Z,15Z))	LMGL03010167	Glycerolipids	Triradylglycerols	Triacylglycerols	TG			57.2	90.5	M+NH4, M+K	C55H96O6	-0.399856	1.50818e+06	1.5266e+06	1.53471e+06	1.51357e+06	2.01231e+06	1.82044e+06	1.76949e+06	1.7295e+06	1.41069e+06	1.38118e+06	1.47125e+06	1.1197e+06
11.27_872.6897n	890.724	11.2686	pos	TG(16:1(9Z)/18:3(9Z,12Z,15Z)/20:5(5Z,8Z,11Z,14Z,17Z))	LMGL03010559	Glycerolipids	Triradylglycerols	Triacylglycerols	TG			55	82.1	M+NH4, M+Na	C57H92O6	0.400359	1.41646e+06	1.41117e+06	1.30912e+06	1.41504e+06	2.1705e+06	1.95303e+06	2.36765e+06	1.92271e+06	1.05398e+06	1.09675e+06	960743	727569
14.08_890.8302n	908.864	14.0765	pos	TG(18:0/18:0/18:0)	LMGL03010002	Glycerolipids	Triradylglycerols	Triacylglycerols	TG	**	C00422	38.7	0	M+NH4, M+Na	C57H110O6	-0.0199119	372670	370636	363697	398723	490911	408487	488008	367590	276999	395894	330083	441241
13.37_886.7989n	904.833	13.3682	pos	TG(18:0/18:1(9Z)/18:1(9Z))	LMGL03010217	Glycerolipids	Triradylglycerols	Triacylglycerols	TG			50	68.6	M+NH4, M+Na	C57H106O6	-0.0713885	870554	808507	885606	942699	871442	762668	1.06068e+06	1.36977e+06	817453	756775	661555	928498
13.01_884.7835n	902.817	13.0117	pos	TG(18:0/18:1(9Z)/18:2(9Z,12Z))	LMGL03010252	Glycerolipids	Triradylglycerols	Triacylglycerols	TG			54.2	77	M+NH4, M+Na	C57H104O6	0.249364	1.74403e+06	1.84881e+06	1.85294e+06	1.85316e+06	1.7517e+06	1.46896e+06	1.65878e+06	5.62925e+06	1.65354e+06	1.48217e+06	1.44109e+06	1.99095e+06
12.38_880.7521n	898.786	12.3823	pos	TG(18:0/18:2(9Z,12Z)/18:3(9Z,12Z,15Z))	LMGL03010329	Glycerolipids	Triradylglycerols	Triacylglycerols	TG			50.9	59.5	M+NH4, M+Na	C57H100O6	0.103747	1.75318e+06	1.78666e+06	1.76333e+06	1.67698e+06	2.21064e+06	1.95826e+06	2.54105e+06	2.39692e+06	1.26494e+06	1.17663e+06	1.2822e+06	1.19547e+06
13.74_932.8635m/z	932.864	13.7437	pos	TG(18:0/18:2(9Z,12Z)/20:0)	LMGL03010427	Glycerolipids	Triradylglycerols	Triacylglycerols	TG			36.8	0	M+NH4	C59H110O6	-0.573464	28959.8	53306.6	47489.5	58465.6	65517.4	52295.6	25544.4	127012	27735.1	36694.6	16102.6	29686.2
13.37_930.8478m/z	930.848	13.3682	pos	TG(18:0/18:3(9Z,12Z,15Z)/20:0)	LMGL03010477	Glycerolipids	Triradylglycerols	Triacylglycerols	TG			36.7	0	M+NH4	C59H108O6	-0.622618	61817.1	90381	74146.3	84054.4	158813	84150.9	82821.6	177344	66616.9	46177.3	51096.6	105957
12.68_882.7681n	900.802	12.6759	pos	TG(18:1(9Z)/18:1(9Z)/18:2(9Z,12Z))	LMGL03010288	Glycerolipids	Triradylglycerols	Triacylglycerols	TG			52.9	71.7	M+NH4, M+Na	C57H102O6	0.503533	1.63883e+06	1.71712e+06	1.70805e+06	1.75724e+06	1.7391e+06	1.21583e+06	1.47843e+06	3.1839e+06	1.2273e+06	1.16115e+06	1.10649e+06	1.49018e+06
12.09_878.7360n	896.77	12.0863	pos	TG(18:1(9Z)/18:2(9Z,12Z)/18:3(9Z,12Z,15Z))	LMGL03010373	Glycerolipids	Triradylglycerols	Triacylglycerols	TG			55.6	84.3	M+NH4, M+K, M+Na	C57H98O6	-0.423913	2.35576e+06	2.33662e+06	2.39557e+06	2.34766e+06	3.07837e+06	3.12951e+06	2.64809e+06	2.66492e+06	1.56631e+06	1.52349e+06	1.75914e+06	1.35143e+06
12.99_928.8328m/z	928.833	12.9902	pos	TG(18:1(9Z)/18:3(9Z,12Z,15Z)/20:0)	LMGL03010532	Glycerolipids	Triradylglycerols	Triacylglycerols	TG			36.6	0	M+NH4	C59H106O6	0.0212776	176953	166390	180238	204831	241373	121848	201725	245913	131438	81023.8	87972.4	188198
11.79_876.7207n	894.755	11.7908	pos	TG(18:2(9Z,12Z)/18:2(9Z,12Z)/18:3(9Z,12Z,15Z))	LMGL03010420	Glycerolipids	Triradylglycerols	Triacylglycerols	TG			55.6	81.6	M+Na, M+K, M+NH4	C57H96O6	0.0375908	3.40194e+06	3.40638e+06	3.43242e+06	3.46205e+06	5.09024e+06	4.14492e+06	4.70354e+06	4.24895e+06	2.66918e+06	2.63609e+06	2.80263e+06	2.04748e+06
11.54_874.7053n	892.739	11.537	pos	TG(18:2(9Z,12Z)/18:3(9Z,12Z,15Z)/18:3(9Z,12Z,15Z))	LMGL03010471	Glycerolipids	Triradylglycerols	Triacylglycerols	TG			56.3	86.6	M+NH4, M+Na, M+K	C57H94O6	0.316031	2.52813e+06	2.51351e+06	2.58903e+06	2.51206e+06	4.31741e+06	3.33045e+06	3.96773e+06	3.5276e+06	2.08447e+06	2.11464e+06	2.00072e+06	1.51438e+06
13.41_956.8636m/z	956.864	13.4093	pos	TG(18:2(9Z,12Z)/20:1(11Z)/20:1(11Z))	LMGL03010857	Glycerolipids	Triradylglycerols	Triacylglycerols	TG			36.3	0	M+NH4	C61H110O6	-0.460641	25817.6	55979.9	41296.9	28022.6	94642.7	44841.6	36060.8	62517.1	33568.7	21483.4	36458.6	58506.8
12.40_906.7681n	924.802	12.4033	pos	TG(18:3(9Z,12Z,15Z)/18:3(9Z,12Z,15Z)/20:0)	LMGL03010653	Glycerolipids	Triradylglycerols	Triacylglycerols	TG			36.6	0	M+NH4, M+Na	C59H102O6	0.512154	160726	150002	123030	146116	310956	108412	174549	172905	51831.6	46673.2	46071.8	80887
13.37_982.8791m/z	982.879	13.3682	pos	TG(20:1(11Z)/20:2(11Z,14Z)/20:2(11Z,14Z))	LMGL03011312	Glycerolipids	Triradylglycerols	Triacylglycerols	TG			36.1	0	M+NH4	C63H112O6	-0.613319	40984.3	41707.7	25715.3	20983.2	81660.2	47745.5	73464.1	74107.1	25305.9	7489.5	7821.49	18866.7
11.00_998.7410n	1016.77	11.0049	pos	TG(20:4(5Z,8Z,11Z,14Z)/22:6(4Z,7Z,10Z,13Z,16Z,19Z)/22:6(4Z,7Z,10Z,13Z,16Z,19Z))	LMGL03012566	Glycerolipids	Triradylglycerols	Triacylglycerols	TG			36.9	4.45	M+NH4, M+Na	C67H98O6	4.68775	1.15197e+06	1.15826e+06	1.08568e+06	1.20079e+06	922921	885311	917134	972522	1.34527e+06	1.54468e+06	1.48008e+06	1.63032e+06
3.46_639.4029m/z	639.403	3.45667	pos	PA(12:0/20:5(5Z,8Z,11Z,14Z,17Z))	LMGP10010061	Glycerophospholipids	Glycerophosphates	Diacylglycerophosphates	PA			37.4	0	M+H	C35H59O8P	1.38133	54745.2	49357.3	45330.4	57677.8	35910.7	20678.6	37667.3	24344.4	60446.9	66049.9	60443.2	59415.8
4.84_667.4327m/z	667.433	4.8447	pos	PA(14:0/18:2(9Z,12Z))	LMGP10010929	Glycerophospholipids	Glycerophosphates	Diacylglycerophosphates	PA			37.5	0	M+Na	C35H65O8P	2.69931	24697.8	21898.3	22476.2	22094.1	43332.4	45243.2	38064.4	54912.6	10997.9	18942	14902	13200.2
7.86_721.5043m/z	721.504	7.86065	neg	PA(14:0/20:0)	LMGP10010926	Glycerophospholipids	Glycerophosphates	Diacylglycerophosphates	PA			38.3	6.38	M+FA-H	C37H73O8P	2.68944	13717.8	12783.7	14764.9	15087.2	16763.9	33043.5	19457	31566.7	12536.3	16668.9	15407.7	18539.4
4.88_665.4185m/z	665.418	4.88142	neg	PA(14:0/20:5(5Z,8Z,11Z,14Z,17Z))	LMGP10010924	Glycerophospholipids	Glycerophosphates	Diacylglycerophosphates	PA			39.6	0	M-H	C37H63O8P	-0.450827	164054	166391	210778	158674	312494	137647	109092	268155	146353	234852	116386	176433
1.07_611.3691m/z	611.369	1.07478	pos	PA(14:1(9Z)/14:1(9Z))	LMGP10010921	Glycerophospholipids	Glycerophosphates	Diacylglycerophosphates	PA			37.8	0	M+Na	C31H57O8P	1.24789	14098.8	24850.8	17470.1	18923.6	15313	22814.1	28436.5	25204.1	16158.9	21501.1	15240.9	20292.7
3.11_639.4026m/z	639.403	3.11155	pos	PA(14:1(9Z)/18:4(6Z,9Z,12Z,15Z))	LMGP10010122	Glycerophospholipids	Glycerophosphates	Diacylglycerophosphates	PA			38.2	0	M+H	C35H59O8P	0.862535	108657	117292	113247	106857	115583	96175.9	103094	109148	127561	108250	119026	106617
5.36_743.4883m/z	743.488	5.36258	neg	PA(14:1(9Z)/22:2(13Z,16Z))	LMGP10010134	Glycerophospholipids	Glycerophosphates	Diacylglycerophosphates	PA			37.1	0	M+FA-H	C39H71O8P	2.08387	5165.19	6929.15	5212.49	6807.41	3288.97	3376.38	3090.23	4524.45	5081.87	4605.55	3871.36	7040.31
10.23_631.4703m/z	631.47	10.234	pos	PA(16:0/16:0)	LMGP10010027	Glycerophospholipids	Glycerophosphates	Diacylglycerophosphates	PA	**	C00416	36.9	0	M+H-H2O	C35H69O8P	0.92143	67424.5	35886.4	38979.5	55748	64647.2	49159.2	60686.1	50885.8	43080.3	57902.3	33008	63843
7.27_690.5066m/z	690.507	7.26813	pos	PA(16:0/18:2(9Z,12Z))	LMGP10010023	Glycerophospholipids	Glycerophosphates	Diacylglycerophosphates	PA	**	C00416	52.1	70.2	M+NH4	C37H69O8P	-0.343484	228156	215103	243050	224307	364579	655071	444617	356106	124038	199374	176497	425828
6.29_669.4515m/z	669.451	6.29337	neg	PA(16:0/18:3(6Z,9Z,12Z))	LMGP10010907	Glycerophospholipids	Glycerophosphates	Diacylglycerophosphates	PA			41.9	22.3	M-H	C37H67O8P	2.06163	17143.7	23458.5	17835.9	16553.6	34686.6	72908.5	49329.3	41617.1	9601.01	15544.9	11189.6	31151.1
6.32_670.4578n	688.492	6.31943	pos	PA(16:0/18:3(9Z,12Z,15Z))	LMGP10010975	Glycerophospholipids	Glycerophosphates	Diacylglycerophosphates	PA			52.2	68	M+NH4, M+Na, M+H	C37H67O8P	0.612346	171724	185121	169684	190420	260649	525086	329871	321189	84822.7	130401	127693	318018
8.57_742.5385m/z	742.538	8.56653	pos	PA(16:0/22:4(7Z,10Z,13Z,16Z))	LMGP10010970	Glycerophospholipids	Glycerophosphates	Diacylglycerophosphates	PA			37	0	M+NH4	C41H73O8P	0.443659	30635.5	27197.3	42299.3	26461.3	11300.6	17714	22772.1	58394.5	42637.7	25254.7	27269.9	57744
3.22_617.4202m/z	617.42	3.22143	pos	PA(16:1(9Z)/14:1(9Z))	LMGP10010202	Glycerophospholipids	Glycerophosphates	Diacylglycerophosphates	PA			37.5	0	M+H	C33H61O8P	4.07612	71913.5	48592.9	74998.3	61329.7	70556.3	50781.9	45365.1	76256.3	58885	58192.9	61045.6	55314
3.94_715.4564m/z	715.456	3.94475	neg	PA(16:1(9Z)/18:2(9Z,12Z))	LMGP10010902	Glycerophospholipids	Glycerophosphates	Diacylglycerophosphates	PA			37.9	0	M+FA-H	C37H67O8P	1.26656	2258.14	1772.6	1626.59	1996.36	4356.48	2348.01	682.277	4521.81	1564.15	1048.99	1938.98	1100.65
5.88_686.4757m/z	686.476	5.877	pos	PA(16:1(9Z)/18:3(6Z,9Z,12Z))	LMGP10010210	Glycerophospholipids	Glycerophosphates	Diacylglycerophosphates	PA			47.9	51.5	M+NH4	C37H65O8P	0.22765	36006	34175.4	32941.2	46287.7	50642.8	106183	103955	51978.6	44531.4	39315.1	57277.4	112176
3.80_713.4413m/z	713.441	3.79587	neg	PA(16:1(9Z)/18:3(9Z,12Z,15Z))	LMGP10010211	Glycerophospholipids	Glycerophosphates	Diacylglycerophosphates	PA			40.6	12.8	M+FA-H	C37H65O8P	2.07109	9844.31	11269.2	9253.92	9729.39	12535.5	2866.41	4888.72	10200.9	8631.62	7286.43	12294.4	7606.46
5.61_741.4727m/z	741.473	5.60892	neg	PA(16:1(9Z)/20:3(8Z,11Z,14Z))	LMGP10010217	Glycerophospholipids	Glycerophosphates	Diacylglycerophosphates	PA			50.5	55.8	M+FA-H	C39H69O8P	2.13883	381336	356565	410983	352899	261688	389011	240703	444465	460999	526036	624629	453566
11.33_713.5502m/z	713.55	11.3299	pos	PA(16:1(9Z)/22:0)	LMGP10010220	Glycerophospholipids	Glycerophosphates	Diacylglycerophosphates	PA			36.4	0	M+H-H2O	C41H79O8P	3.07754	19033.8	40669.4	34351.3	21005.6	12002.3	20611.7	39021.7	12819.7	12433.2	23852.2	29386.2	30031.6
10.03_744.5537m/z	744.554	10.0275	pos	PA(16:1(9Z)/22:2(13Z,16Z))	LMGP10010222	Glycerophospholipids	Glycerophosphates	Diacylglycerophosphates	PA			37.6	0	M+NH4	C41H75O8P	-0.123328	47730.7	39927.6	29181.2	65999.8	56376.7	71399.3	28504.9	128691	83022.3	76181.3	70419.3	130083
5.53_736.4924m/z	736.492	5.52802	pos	PA(16:1(9Z)/22:6(4Z,7Z,10Z,13Z,16Z,19Z))	LMGP10010899	Glycerophospholipids	Glycerophosphates	Diacylglycerophosphates	PA			36.4	0	M+NH4	C41H67O8P	1.65005	29653.6	25942.9	32340.5	28928	11985	24662	17009.5	27153.5	35774	23016.1	25315.9	47284.1
6.78_745.5044m/z	745.504	6.78238	neg	PA(18:0/18:2(9Z,12Z))	LMGP10010036	Glycerophospholipids	Glycerophosphates	Diacylglycerophosphates	PA	**	C00416	43.4	23.9	M+FA-H	C39H73O8P	2.65957	76058.8	81588.2	79083	85772.7	74845.6	133827	92515.8	133707	115277	105245	116836	78505.5
5.73_742.5379m/z	742.538	5.72568	pos	PA(18:0/20:4(5Z,8Z,11Z,14Z))	LMGP10010024	Glycerophospholipids	Glycerophosphates	Diacylglycerophosphates	PA			37	0	M+NH4	C41H73O8P	-0.382185	57449.9	60365.4	37169.4	40149.9	83236.9	55318.4	92711.8	51089.7	8565.34	8894.27	51288.2	12663.3
7.31_774.6002m/z	774.6	7.31388	pos	PA(18:0/22:2(13Z,16Z))	LMGP10010319	Glycerophospholipids	Glycerophosphates	Diacylglycerophosphates	PA			36.3	0	M+NH4	C43H81O8P	-0.762418	75156.8	36479.7	92342.2	75868.6	40178.3	53910.5	81557.9	71112.2	138577	96956.8	98354.1	103462
5.94_770.5695m/z	770.569	5.94473	pos	PA(18:0/22:4(7Z,10Z,13Z,16Z))	LMGP10010883	Glycerophospholipids	Glycerophosphates	Diacylglycerophosphates	PA			36.7	0	M+NH4	C43H77O8P	0.0756529	39741.3	33778.9	44242.2	33249.1	13275	23708.5	22504.5	28404.6	57844.1	48142.5	80767.6	48018.9
7.93_690.5065m/z	690.506	7.93232	pos	PA(18:1(9Z)/16:1(9Z))	LMGP10010881	Glycerophospholipids	Glycerophosphates	Diacylglycerophosphates	PA			38.3	0	M+NH4	C37H69O8P	-0.50753	30639.9	31710.5	25549.3	24706.7	57154.9	68861.3	60431.8	53325.1	10597.1	21725.2	16761.6	61244.2
7.98_747.5201m/z	747.52	7.98118	neg	PA(18:1(9Z)/18:0)	LMGP10010963	Glycerophospholipids	Glycerophosphates	Diacylglycerophosphates	PA			43.9	28.2	M+FA-H	C39H75O8P	2.7332	81991.9	95100.4	79654.9	79197.7	76969.7	114810	83927.5	105988	74065.8	69888.8	115260	86061
6.29_695.4669m/z	695.467	6.29337	neg	PA(18:1(9Z)/18:3(6Z,9Z,12Z))	LMGP10010328	Glycerophospholipids	Glycerophosphates	Diacylglycerophosphates	PA			40.3	15.3	M-H	C39H69O8P	1.66329	19665.6	24121.4	23959.8	23236.1	36356.4	71901.9	50962.1	42242.2	10630.7	16974.6	14987.8	35808.1
8.98_772.5852m/z	772.585	8.98468	pos	PA(18:1(9Z)/22:2(13Z,16Z))	LMGP10010336	Glycerophospholipids	Glycerophosphates	Diacylglycerophosphates	PA			37.4	0	M+NH4	C43H79O8P	0.172875	12932.6	18151.1	14164.9	7482.72	6380.18	8258.5	13861.7	18389.4	57596.9	36004	16727.3	33174.2
0.60_746.4918n	769.481	0.599217	pos	PA(18:1(9Z)/22:6(4Z,7Z,10Z,13Z,16Z,19Z))	LMGP10010040	Glycerophospholipids	Glycerophosphates	Diacylglycerophosphates	PA			36.3	0	M+Na, M+K	C43H71O8P	4.22423	47659.6	37704.4	45392.1	41728.5	39419.9	35504.7	44342.9	27216.8	57265.4	70975	30344.6	62770.5
7.25_671.4670m/z	671.467	7.24893	neg	PA(18:2(9Z,12Z)/16:0)	LMGP10010877	Glycerophospholipids	Glycerophosphates	Diacylglycerophosphates	PA			41.3	20.4	M-H	C37H69O8P	1.84132	17485.3	13940	17203.1	20603.8	30326.6	66052	34710.5	29394.4	6776.93	15916.6	19512.9	40473.1
6.30_696.4728n	714.507	6.29753	pos	PA(18:2(9Z,12Z)/18:2(9Z,12Z))	LMGP10010957	Glycerophospholipids	Glycerophosphates	Diacylglycerophosphates	PA			48.9	55.5	M+H, M+NH4	C39H69O8P	-0.309417	213368	211577	184099	207421	269177	487913	351513	295413	107552	141896	157240	336744
5.56_693.4512m/z	693.451	5.56263	neg	PA(18:2(9Z,12Z)/18:3(6Z,9Z,12Z))	LMGP10010349	Glycerophospholipids	Glycerophosphates	Diacylglycerophosphates	PA			41.2	17.6	M-H	C39H67O8P	1.66855	30509.4	29436.1	31984.6	28747.3	45032.8	106117	52378	54495.2	20355.3	17174.5	24799.6	50227.9
5.57_694.4579n	712.492	5.572	pos	PA(18:2(9Z,12Z)/18:3(9Z,12Z,15Z))	LMGP10010350	Glycerophospholipids	Glycerophosphates	Diacylglycerophosphates	PA			54.5	83.8	M+NH4, M+Na, M+H	C39H67O8P	0.728157	284932	274384	282152	285996	349656	626725	465165	395350	178707	220865	212628	447580
4.98_691.4359m/z	691.436	4.97948	neg	PA(18:2(9Z,12Z)/18:4(6Z,9Z,12Z,15Z))	LMGP10010351	Glycerophospholipids	Glycerophosphates	Diacylglycerophosphates	PA			39	7.68	M-H	C39H65O8P	2.10244	11576.5	10367.1	10701.6	12299.2	17927.9	29615.6	20533.9	14297.1	7604.62	7859.25	9202.09	21612.1
4.50_765.4728m/z	765.473	4.50402	neg	PA(18:2(9Z,12Z)/20:4(5Z,8Z,11Z,14Z))	LMGP10010875	Glycerophospholipids	Glycerophosphates	Diacylglycerophosphates	PA			38.7	8.6	M+FA-H	C41H69O8P	2.25415	4245.63	5253.82	4720.83	4489.25	355.771	758.209	2106.47	1576.51	5541.54	6793.09	4983.97	4087.59
5.56_733.5213m/z	733.521	5.56263	neg	PA(18:2(9Z,12Z)/22:2(13Z,16Z))	LMGP10010362	Glycerophospholipids	Glycerophosphates	Diacylglycerophosphates	PA			36.4	0	M-H2O-H	C43H77O8P	4.66182	7025.95	3131.55	7247.71	4494.26	6242.24	6506.74	4645.68	7593.26	3569.96	3984.84	6786.68	5306.48
5.90_667.4361m/z	667.436	5.89545	neg	PA(18:3(6Z,9Z,12Z)/16:1(9Z))	LMGP10010371	Glycerophospholipids	Glycerophosphates	Diacylglycerophosphates	PA			40.3	13.9	M-H	C37H65O8P	2.4644	14526.2	15980.5	14537.5	14872.8	18350.2	34454.5	26275.6	19452	8144.6	11203	11432.3	27265.1
4.98_692.4416n	710.475	4.97653	pos	PA(18:3(6Z,9Z,12Z)/18:3(9Z,12Z,15Z))	LMGP10010379	Glycerophospholipids	Glycerophosphates	Diacylglycerophosphates	PA			47.2	46.8	M+NH4, M+Na, M+H	C39H65O8P	-0.187128	107295	98569.2	97352.2	92925.5	115225	251564	161970	146090	48798.1	74041.4	80904	152854
9.03_742.5385m/z	742.538	9.02922	pos	PA(18:3(6Z,9Z,12Z)/20:1(11Z))	LMGP10010384	Glycerophospholipids	Glycerophosphates	Diacylglycerophosphates	PA			36.7	0	M+NH4	C41H73O8P	0.467364	9166.86	15104.2	7757.11	9487.26	4934.52	14052.7	3026.43	26850.1	11176.9	6020.35	10745.4	34928.2
3.88_760.4918m/z	760.492	3.87607	pos	PA(18:3(6Z,9Z,12Z)/22:6(4Z,7Z,10Z,13Z,16Z,19Z))	LMGP10010394	Glycerophospholipids	Glycerophosphates	Diacylglycerophosphates	PA			36.9	0	M+NH4	C43H67O8P	0.89951	30270.4	29470.6	33243.1	26319.1	21047.8	27062.9	16253	37529.3	20499.5	25091.2	19668.8	14911.8
5.03_713.4404m/z	713.44	5.02562	neg	PA(18:3(9Z,12Z,15Z)/16:1(9Z))	LMGP10010401	Glycerophospholipids	Glycerophosphates	Diacylglycerophosphates	PA			36.6	0	M+FA-H	C37H65O8P	0.780808	3522.51	5846.57	4357.26	4040.9	5844.8	3266.31	3874.87	3359.69	5469.31	5325.34	6699.19	3335.04
6.59_723.4989m/z	723.499	6.5921	neg	PA(18:3(9Z,12Z,15Z)/20:1(11Z))	LMGP10010412	Glycerophospholipids	Glycerophosphates	Diacylglycerophosphates	PA			36.2	0	M-H	C41H73O8P	2.59445	4187.29	2764.76	4864.96	2938.25	616.353	1330.15	167.768	178.439	3931.99	2716.17	2582.13	883.241
2.44_639.4030m/z	639.403	2.44222	pos	PA(18:4(6Z,9Z,12Z,15Z)/14:1(9Z))	LMGP10010426	Glycerophospholipids	Glycerophosphates	Diacylglycerophosphates	PA			38	0	M+H	C35H59O8P	1.46788	29751.8	30780.6	23738.9	28441.2	30962	20919.3	26824.9	22904.7	32516.6	38832.6	28951.3	33366.7
9.07_747.5202m/z	747.52	9.07437	neg	PA(20:0/16:1(9Z))	LMGP10010512	Glycerophospholipids	Glycerophosphates	Diacylglycerophosphates	PA			36.1	0	M+FA-H	C39H75O8P	2.89066	4056.28	4720.28	2794.81	4767.6	4727.6	8376.97	3199.98	8374.19	4034.2	6223.21	8216.68	6417.19
5.08_741.4731m/z	741.473	5.0809	neg	PA(20:3(8Z,11Z,14Z)/16:1(9Z))	LMGP10010594	Glycerophospholipids	Glycerophosphates	Diacylglycerophosphates	PA			42.9	26	M+FA-H	C39H69O8P	2.74159	19165.1	18458.3	19304.8	18236.9	11770.1	11850.3	12613.6	15658.8	19270	21573.2	28769.2	19456.6
5.81_721.4831m/z	721.483	5.80557	neg	PA(20:3(8Z,11Z,14Z)/18:2(9Z,12Z))	LMGP10010600	Glycerophospholipids	Glycerophosphates	Diacylglycerophosphates	PA			42.7	30.3	M-H	C41H71O8P	2.41538	4075.82	4013.8	3243.9	3712.39	244.34	1652.21	803.81	260.304	4600.45	4317.5	3817.79	1239.45
3.65_773.4534m/z	773.453	3.65333	neg	PA(22:6(4Z,7Z,10Z,13Z,16Z,19Z)/22:6(4Z,7Z,10Z,13Z,16Z,19Z))	LMGP10010041	Glycerophospholipids	Glycerophosphates	Diacylglycerophosphates	PA			38.7	11.6	M-H2O-H	C47H69O8P	-2.19824	7857.49	11207.3	11725.2	11445.8	11550.8	4258.63	5635.82	9749.09	9473.87	13431.5	14224.1	13957.9
4.16_411.2507m/z	411.251	4.163	pos	PA(0:0/16:0)	LMGP10050042	Glycerophospholipids	Glycerophosphates	Monoacylglycerophosphates	LPA	**	C00416	38.5	0	M+H	C19H39O7P	0.168033	20864.6	22680.8	18983.9	21454.5	19240.9	17407	22573.9	22556.3	23575.5	23656.4	20656.7	23726.2
2.17_483.2742m/z	483.274	2.1681	neg	PA(0:0/18:0)	LMGP10050043	Glycerophospholipids	Glycerophosphates	Monoacylglycerophosphates	LPA	**	C00416	41.4	15.2	M+FA-H	C21H43O7P	3.04454	6160.34	7146.51	6774.44	5504.8	5556.58	6203.04	5056.81	7797.28	6871.14	6709.52	7030.33	6870.91
1.68_365.2085m/z	365.209	1.67672	pos	PA(14:0/0:0)	LMGP10050007	Glycerophospholipids	Glycerophosphates	Monoacylglycerophosphates	LPA			38.3	0	M+H-H2O	C17H35O7P	-0.534626	1565.31	1272.21	1649.09	1321.73	959.887	488.164	1141.04	1407.68	779.87	1469.28	1349.05	918.563
2.78_363.1929m/z	363.193	2.77712	pos	PA(14:1(9Z)/0:0)	LMGP10050038	Glycerophospholipids	Glycerophosphates	Monoacylglycerophosphates	LPA			39.1	0	M+H-H2O	C17H33O7P	-0.589009	2460.68	1701.77	1405.64	1805.16	2251.56	1457.18	1995.12	1753.39	1585.61	1628.49	1765.59	1125.09
0.70_409.2372m/z	409.237	0.700833	neg	PA(16:0/0:0)	LMGP10050006	Glycerophospholipids	Glycerophosphates	Monoacylglycerophosphates	LPA			38.3	0	M-H	C19H39O7P	2.7098	797.788	887.16	416.044	555.992	1016.9	813.696	477.52	905.452	568.81	580.233	866.954	550.032
3.17_437.2677m/z	437.268	3.17255	neg	PA(18:0/0:0)	LMGP10050005	Glycerophospholipids	Glycerophosphates	Monoacylglycerophosphates	LPA			39	2.78	M-H	C21H43O7P	0.771893	36594.4	32964.2	42378	41494.4	28419.7	33364.7	31107.1	38388.7	40731.4	31678.3	47918.2	37766
5.00_482.3242m/z	482.324	4.99768	pos	PA(20:1(11Z)/0:0)	LMGP10050026	Glycerophospholipids	Glycerophosphates	Monoacylglycerophosphates	LPA			39.1	0	M+NH4	C23H45O7P	0.191251	6753.86	7644.4	6147.76	3999.95	7111.05	6129.08	14231.7	8531.69	7651.64	3959	5497.51	5911.13
1.77_507.2746m/z	507.275	1.77222	neg	PA(20:2(11Z,14Z)/0:0)	LMGP10050027	Glycerophospholipids	Glycerophosphates	Monoacylglycerophosphates	LPA			37.6	0	M+FA-H	C23H43O7P	3.89659	412.61	642.74	586.97	434.335	276.234	356.374	407.039	358.243	757.911	685.764	928.958	729.815
1.45_505.2591m/z	505.259	1.44817	neg	PA(20:3(8Z,11Z,14Z)/0:0)	LMGP10050028	Glycerophospholipids	Glycerophosphates	Monoacylglycerophosphates	LPA			41	13.2	M+FA-H	C23H41O7P	4.17911	7566.44	8113.16	7975.6	7809.4	3024.45	4494.34	4302.85	4983.11	9664.88	9130.12	10367.7	9158.06
1.32_473.2644m/z	473.264	1.31505	pos	PA(21:4(6Z,9Z,12Z,15Z)/0:0)	LMGP10050003	Glycerophospholipids	Glycerophosphates	Monoacylglycerophosphates	LPA			38.2	0	M+H	C24H41O7P	-3.96097	969494	977151	946285	943554	969384	1.15269e+06	931791	838107	1.09526e+06	1.00546e+06	1.02379e+06	998153
7.11_750.5302m/z	750.53	7.11177	neg	PC(14:0/16:0)	LMGP01010481	Glycerophospholipids	Glycerophosphocholines	Diacylglycerophosphocholines	PC			38.1	0	M+FA-H	C38H76NO8P	1.57426	15077	10910.3	12104.6	7997.56	8854.99	8784.32	7766.56	9667.38	10552.9	11747.3	8343.52	8338.24
9.63_760.5850m/z	760.585	9.6263	pos	PC(14:0/20:1(11Z))	LMGP01011372	Glycerophospholipids	Glycerophosphocholines	Diacylglycerophosphocholines	PC	**	C00157	41.4	23.2	M+H	C42H82NO8P	-0.137571	989146	972949	954663	1.05879e+06	840446	757238	768658	912137	1.59714e+06	1.77209e+06	1.865e+06	1.43877e+06
6.89_755.5466n	756.554	6.89418	pos	PC(14:0/20:3(8Z,11Z,14Z))	LMGP01011374	Glycerophospholipids	Glycerophosphocholines	Diacylglycerophosphocholines	PC	**	C00157	51	57.9	M+H, M+Na	C42H78NO8P	0.0753235	2.37445e+06	2.33655e+06	2.35794e+06	2.43079e+06	1.58657e+06	1.62689e+06	1.46285e+06	2.55381e+06	5.65832e+06	4.72744e+06	4.09549e+06	3.69612e+06
7.31_788.6169m/z	788.617	7.31388	pos	PC(14:0/22:1(13Z))	LMGP01012129	Glycerophospholipids	Glycerophosphocholines	Diacylglycerophosphocholines	PC	**	C00157	37	0	M+H	C44H86NO8P	0.6713	32055.1	51880.4	57343.9	44163.7	29371.5	33179.1	44436.7	35185.4	87576.2	64433.2	82732	95067.1
10.78_816.6472m/z	816.647	10.7812	pos	PC(14:0/24:1(15Z))	LMGP01010516	Glycerophospholipids	Glycerophosphocholines	Diacylglycerophosphocholines	PC			36.6	0	M+H	C46H90NO8P	-0.592186	58845.7	27907.8	73809.9	58849.3	78069.6	114177	59764.2	61360.7	54899.7	100984	162972	144370
9.88_786.6007m/z	786.601	9.88118	pos	PC(14:1(9Z)/22:1(13Z))	LMGP01012133	Glycerophospholipids	Glycerophosphocholines	Diacylglycerophosphocholines	PC			43.4	21.2	M+H	C44H84NO8P	0.00920953	626948	680585	658288	664756	427944	432891	402357	512851	1.20445e+06	1.05429e+06	1.41508e+06	1.03788e+06
8.54_784.5852m/z	784.585	8.5442	pos	PC(14:1(9Z)/22:2(13Z,16Z))	LMGP01011406	Glycerophospholipids	Glycerophosphocholines	Diacylglycerophosphocholines	PC			40.6	11.5	M+H	C44H82NO8P	0.172479	292118	289810	277840	290165	190198	179060	165251	240297	612721	557255	559040	457390
8.00_757.5622n	758.57	7.99613	pos	PC(16:0/18:2(9Z,12Z))	LMGP01010594	Glycerophospholipids	Glycerophosphocholines	Diacylglycerophosphocholines	PC			53.4	68.7	M+H, M+Na	C42H80NO8P	0.100404	9.60826e+06	9.20376e+06	8.98084e+06	9.14085e+06	6.97721e+06	6.39148e+06	6.64632e+06	8.76951e+06	1.9754e+07	1.65048e+07	1.87522e+07	1.55548e+07
6.90_800.5461m/z	800.546	6.90247	neg	PC(16:0/18:3(6Z,9Z,12Z))	LMGP01010598	Glycerophospholipids	Glycerophosphocholines	Diacylglycerophosphocholines	PC			38.6	8.61	M+FA-H	C42H78NO8P	1.87636	12266.8	15130.1	16175	9920.87	9902.22	7223.6	8143.27	23012.8	40615.8	27137.1	7085.83	25126.2
8.13_783.5780n	784.585	8.12627	pos	PC(16:0/20:3(8Z,11Z,14Z))	LMGP01010627	Glycerophospholipids	Glycerophosphocholines	Diacylglycerophosphocholines	PC	**	C00157	42.4	18.4	M+H, M+Na	C44H82NO8P	0.23149	745318	718298	773948	741756	404714	334470	439471	661334	1.43313e+06	1.26887e+06	1.69764e+06	1.11009e+06
6.01_779.5464n	780.554	6.00995	pos	PC(16:0/20:5(5Z,8Z,11Z,14Z,17Z))	LMGP01010633	Glycerophospholipids	Glycerophosphocholines	Diacylglycerophosphocholines	PC	**	C00157	43.6	23.2	M+H, M+Na	C44H78NO8P	-0.14264	1.48515e+06	1.42369e+06	1.45711e+06	1.54983e+06	817429	672898	609654	975445	3.94046e+06	3.2742e+06	2.27421e+06	2.08413e+06
5.94_784.5855m/z	784.586	5.94473	pos	PC(16:1(9Z)/20:2(11Z,14Z))	LMGP01011490	Glycerophospholipids	Glycerophosphocholines	Diacylglycerophosphocholines	PC			36.2	0	M+H	C44H82NO8P	0.583672	41710.6	22091.8	21812.4	43780.3	7014.88	24413.2	13483.8	29569.7	59223.1	20193.7	83585.6	47315.8
9.70_804.5779m/z	804.578	9.698	neg	PC(18:1(11Z)/16:0)	LMGP01012146	Glycerophospholipids	Glycerophosphocholines	Diacylglycerophosphocholines	PC	**	C00157	41.4	28.7	M+FA-H	C42H82NO8P	2.42787	6808.84	5531.78	6559.12	5408.9	3827	2198.85	1814.96	5251.1	14460.2	14058.3	5301.13	8961.54
6.36_786.6007m/z	786.601	6.3649	pos	PC(18:1(11Z)/18:1(11Z))	LMGP01010841	Glycerophospholipids	Glycerophosphocholines	Diacylglycerophosphocholines	PC	**	C00157	36.8	0	M+H	C44H84NO8P	-0.0561348	49364.2	52104.5	45033.3	48505.7	28084	41478.5	47752.6	55172.4	58607.2	55786.9	74060.9	47531.9
8.13_828.5784m/z	828.578	8.13283	neg	PC(18:1(11Z)/18:2(9Z,12Z))	LMGP01012149	Glycerophospholipids	Glycerophosphocholines	Diacylglycerophosphocholines	PC			37.6	12.9	M+FA-H	C44H82NO8P	2.99288	3463.16	4953.21	4329.4	5087.09	292.886	275.117	1230.41	4055.35	14442.5	12160.2	3137.43	6115.86
6.87_781.5623n	782.57	6.87235	pos	PC(18:1(11Z)/18:3(6Z,9Z,12Z))	LMGP01012150	Glycerophospholipids	Glycerophosphocholines	Diacylglycerophosphocholines	PC			52.8	69.1	M+H, M+Na	C44H80NO8P	0.128641	2.01498e+06	2.04309e+06	2.02168e+06	1.97372e+06	1.08538e+06	954137	1.04631e+06	1.50051e+06	4.77339e+06	4.13837e+06	4.02159e+06	3.85385e+06
8.04_802.5622m/z	802.562	8.04403	neg	PC(18:2(9Z,12Z)/16:0)	LMGP01010932	Glycerophospholipids	Glycerophosphocholines	Diacylglycerophosphocholines	PC			38.9	10.6	M+FA-H	C42H80NO8P	2.37034	22981.9	22604.7	19091.2	19624.6	13721.8	11956.5	11966.9	17838.2	46931.9	41036.4	18717.5	29734.7
5.33_777.5308n	778.538	5.32697	pos	PC(18:2(9Z,12Z)/18:4(6Z,9Z,12Z,15Z))	LMGP01011627	Glycerophospholipids	Glycerophosphocholines	Diacylglycerophosphocholines	PC			43.5	21.6	M+H, M+Na	C44H76NO8P	-0.0748996	465143	502596	457728	496143	226494	188721	163751	398155	1.45249e+06	1.16888e+06	937181	1.03792e+06
5.62_810.6005m/z	810.601	5.61687	pos	PC(18:2(9Z,12Z)/20:2(11Z,14Z))	LMGP01011632	Glycerophospholipids	Glycerophosphocholines	Diacylglycerophosphocholines	PC	**	C00157	36	0	M+H	C46H84NO8P	-0.267195	27032.8	22121	16913	19519.6	14509.9	17822.9	10732.5	16166.6	43320.4	30632.2	30654.6	40635.1
5.59_772.4917m/z	772.492	5.58588	neg	PC(18:4(9E,11E,13E,15E)/18:4(9E,11E,13E,15E))	LMGP01010961	Glycerophospholipids	Glycerophosphocholines	Diacylglycerophosphocholines	PC			36.6	0	M-H	C44H72NO8P	-0.69458	11879.9	12714	13572	13454.5	18315.5	11693.9	11852	14375.3	13036.5	15860.7	17113.8	11701.1
5.41_818.4974m/z	818.497	5.40853	neg	PC(18:4(9Z,11E,13E,15Z)/18:4(9Z,11E,13E,15Z))	LMGP01010964	Glycerophospholipids	Glycerophosphocholines	Diacylglycerophosphocholines	PC			36.4	0	M+FA-H	C44H72NO8P	-0.451764	3435.98	3083.88	4153.71	3751.31	1263.28	563.635	299.492	1684.59	7161.61	2914.55	3939.83	3111.51
7.95_814.6347m/z	814.635	7.95288	pos	PC(20:0/18:2(9Z,12Z))	LMGP01011296	Glycerophospholipids	Glycerophosphocholines	Diacylglycerophosphocholines	PC	**	C00157	36.1	0	M+H	C46H88NO8P	3.21882	47080.6	42907.1	49613.9	43303.1	88869.3	54030.3	64335.6	52651.5	54951.7	28621.6	37133.7	33761.3
6.34_812.6166m/z	812.617	6.34228	pos	PC(20:0/18:3(6Z,9Z,12Z))	LMGP01011794	Glycerophospholipids	Glycerophosphocholines	Diacylglycerophosphocholines	PC	**	C00157	37.3	0	M+H	C46H86NO8P	0.26671	16811.3	10856.4	19602.4	21250.9	12849.2	4518.13	11801.3	8065.68	27410.8	19192.8	25766.2	16581.3
2.88_540.3320m/z	540.332	2.87583	neg	PC(0:0/16:0)	LMGP01050074	Glycerophospholipids	Glycerophosphocholines	Monoacylglycerophosphocholines	LPC			46.2	37.9	M+FA-H	C24H50NO7P	2.73941	15264.2	16213.2	14731	15529.7	11208.3	12527.8	12744.7	14956.2	22478.8	19526.8	15804	20919.5
2.91_566.3473m/z	566.347	2.90503	neg	PC(0:0/18:1(9Z))	LMGP01050082	Glycerophospholipids	Glycerophosphocholines	Monoacylglycerophosphocholines	LPC			37.3	0	M+FA-H	C26H52NO7P	1.79259	1771.68	1555.06	2000.31	1420.96	991.687	835.718	573.764	1219.57	3051.34	1689.57	1689.21	2085.54
2.87_495.3329n	496.34	2.86688	pos	PC(16:0/0:0)	LMGP01050018	Glycerophospholipids	Glycerophosphocholines	Monoacylglycerophosphocholines	LPC	**	C04230	53.4	70	M+H, M+Na	C24H50NO7P	0.857961	460702	478204	438317	440046	403631	425959	447387	487167	560911	580564	428539	559496
3.57_524.3713m/z	524.371	3.5682	pos	PC(18:0/0:0)	LMGP01050026	Glycerophospholipids	Glycerophosphocholines	Monoacylglycerophosphocholines	LPC	**	C04230	50.8	59.9	M+H	C26H54NO7P	0.485487	74561.5	62353.8	74041	72313.3	72049.1	72058.5	69051.9	86980.7	82174.6	89597.5	77130.6	86421.3
3.07_522.3557m/z	522.356	3.06625	pos	PC(18:1(11Z)/0:0)	LMGP01050138	Glycerophospholipids	Glycerophosphocholines	Monoacylglycerophosphocholines	LPC	**	C04230	48.7	46.4	M+H	C26H52NO7P	0.546318	60966.2	58133.5	57650	55161.6	38362	39375.6	44744.1	52379.5	67513.8	59050.5	53266.1	64112.7
7.87_1041.6896m/z	1041.69	7.87307	neg	PC(18:1(6Z)/0:0)	LMGP01050029	Glycerophospholipids	Glycerophosphocholines	Monoacylglycerophosphocholines	LPC			36	0	2M-H	C26H52NO7P	0.567466	23727.2	21334.2	29036.1	21911.2	27382	61113.5	31671.6	40497.3	3872.71	11053	18286.4	20207.8
2.89_521.3487n	522.356	2.88942	pos	PC(18:1(9Z)/0:0)	LMGP01050032	Glycerophospholipids	Glycerophosphocholines	Monoacylglycerophosphocholines	LPC			43.3	22.2	M+H, M+Na	C26H52NO7P	0.995548	59689.2	55253.4	58575.9	55950.8	41311.8	33475.5	36636.5	50481.7	75512.7	65115.1	50253.1	61357.1
6.00_1037.6577m/z	1037.66	6.00362	neg	PC(18:2(2E,4E)/0:0)	LMGP01050034	Glycerophospholipids	Glycerophosphocholines	Monoacylglycerophosphocholines	LPC			39	23.1	2M-H	C26H50NO7P	0.0112449	202879	207826	204135	198220	164304	315756	251282	201939	64594.3	104884	165015	178054
2.42_519.3329n	520.34	2.41983	pos	PC(18:2(9Z,12Z)/0:0)	LMGP01050035	Glycerophospholipids	Glycerophosphocholines	Monoacylglycerophosphocholines	LPC			53.2	69.9	M+H, M+Na	C26H50NO7P	0.74157	208350	194526	187124	198050	133886	136608	164019	164002	311618	303191	219776	260506
1.63_518.3245m/z	518.325	1.63202	pos	PC(18:3(6Z,9Z,12Z)/0:0)	LMGP01050128	Glycerophospholipids	Glycerophosphocholines	Monoacylglycerophosphocholines	LPC			48	43.4	M+H	C26H48NO7P	0.763465	139265	135397	141746	141104	87372.6	77603.4	78446	143626	314915	247681	120134	189209
1.81_518.3248m/z	518.325	1.8116	pos	PC(18:3(9Z,12Z,15Z)/0:0)	LMGP01050038	Glycerophospholipids	Glycerophosphocholines	Monoacylglycerophosphocholines	LPC			49.6	53.5	M+H	C26H48NO7P	1.41081	92646.5	92296.5	90059.3	90083.6	53201.4	56806.3	63316.9	81668.5	157927	143469	96148.5	128047
7.67_595.4473m/z	595.447	7.66642	pos	PC(22:1(11Z)/0:0)	LMGP01050134	Glycerophospholipids	Glycerophosphocholines	Monoacylglycerophosphocholines	LPC			37.3	0	M+NH4	C30H60NO7P	4.70691	24948.3	37128.5	27615.4	28577.6	35236.4	33418.1	25719.6	28823.7	30661.6	39708.2	36921.3	41285.6
7.14_595.4470m/z	595.447	7.13585	pos	PC(22:1(13Z)/0:0)	LMGP01050141	Glycerophospholipids	Glycerophosphocholines	Monoacylglycerophosphocholines	LPC	**	C04230	37.7	0	M+NH4	C30H60NO7P	4.23077	11895.4	10558.8	13892.8	7555.88	10619.5	5720.52	11239.8	6325.27	12305.3	20302.2	12627.9	19648
14.63_1149.7883m/z	1149.79	14.6252	neg	PC(22:2(13Z,16Z)/0:0)	LMGP01050135	Glycerophospholipids	Glycerophosphocholines	Monoacylglycerophosphocholines	LPC			36.7	0	2M-H	C30H58NO7P	4.6571	554592	522400	526942	541195	535155	613818	614030	567125	541356	491644	532140	549118
5.24_664.4899m/z	664.49	5.23973	pos	PE(14:0/16:0)	LMGP02010302	Glycerophospholipids	Glycerophosphoethanolamines	Diacylglycerophosphoethanolamines	PE			37.1	0	M+H	C35H70NO8P	-2.00434	5718.97	5755.64	6120.13	3928	13062.1	11512.5	12702.1	13260	9252.11	7534.06	8369.18	10345.6
4.23_758.4729m/z	758.473	4.22977	pos	PE(14:0/22:6(4Z,7Z,10Z,13Z,16Z,19Z))	LMGP02011239	Glycerophospholipids	Glycerophosphoethanolamines	Diacylglycerophosphoethanolamines	PE	**	C00350	36.6	0	M+Na	C41H70NO8P	-0.371594	4022.27	5665.9	4153.78	7810.78	7301.36	6436.48	8966.66	4509.89	5454.56	2940.54	3090.38	1913.16
8.46_715.5153n	716.523	8.45678	pos	PE(16:0/18:2(9Z,12Z))	LMGP02010042	Glycerophospholipids	Glycerophosphoethanolamines	Diacylglycerophosphoethanolamines	PE			54.6	79.4	M+H, M+Na	C39H74NO8P	0.200252	787704	751890	738108	771558	618062	633452	658261	725833	1.2749e+06	1.09758e+06	1.11573e+06	1.33823e+06
7.25_712.4936m/z	712.494	7.24893	neg	PE(16:0/18:3(6Z,9Z,12Z))	LMGP02011224	Glycerophospholipids	Glycerophosphoethanolamines	Diacylglycerophosphoethanolamines	PE			39.9	13.6	M-H	C39H72NO8P	1.89167	18548.7	17847.9	15479.1	19615.2	14012.1	18855.9	17281.9	14399.7	15760.1	18043	20378.9	39424.5
4.60_737.5001n	738.507	4.60282	pos	PE(16:0/20:5(5Z,8Z,11Z,14Z,17Z))	LMGP02011221	Glycerophospholipids	Glycerophosphoethanolamines	Diacylglycerophosphoethanolamines	PE			39.6	2.28	M+H, M+Na, M+H-H2O	C41H72NO8P	0.762838	585201	577027	628451	598142	616855	812882	884161	628795	508494	482449	429706	409122
5.73_740.5252m/z	740.525	5.7336	neg	PE(18:1(9Z)/18:2(9Z,12Z))	LMGP02010048	Glycerophospholipids	Glycerophosphoethanolamines	Diacylglycerophosphoethanolamines	PE			39.7	20.4	M-H	C41H76NO8P	2.23483	9429.1	11613.9	9566.57	10439.4	12728.7	18234.7	13764.9	10233.6	6797.92	4500.24	5641.84	5695.88
5.06_738.5099m/z	738.51	5.05927	neg	PE(18:1(9Z)/18:3(6Z,9Z,12Z))	LMGP02010643	Glycerophospholipids	Glycerophosphoethanolamines	Diacylglycerophosphoethanolamines	PE			45.9	37	M-H	C41H74NO8P	2.70998	147085	161733	168768	165438	197572	242424	283092	162775	145209	125793	155912	111952
7.20_740.5231m/z	740.523	7.20308	pos	PE(18:1(9Z)/18:3(9Z,12Z,15Z))	LMGP02011197	Glycerophospholipids	Glycerophosphoethanolamines	Diacylglycerophosphoethanolamines	PE			46.7	46.9	M+H	C41H74NO8P	0.840506	234973	250083	226817	254623	165391	226868	203224	245723	341772	268826	231759	434647
7.38_838.5706m/z	838.571	7.38023	pos	PE(18:1(9Z)/22:1(11Z))	LMGP02010650	Glycerophospholipids	Glycerophosphoethanolamines	Diacylglycerophosphoethanolamines	PE			40.7	10.2	M+K	C45H86NO8P	-2.12409	1.70284e+06	1.63823e+06	1.67309e+06	1.77441e+06	1.42447e+06	1.48254e+06	1.72187e+06	1.80762e+06	1.71045e+06	1.68036e+06	1.58046e+06	1.87816e+06
8.45_714.5095m/z	714.509	8.45237	neg	PE(18:2(9Z,12Z)/16:0)	LMGP02011194	Glycerophospholipids	Glycerophosphoethanolamines	Diacylglycerophosphoethanolamines	PE			43.3	25.6	M-H	C39H74NO8P	2.17888	65767.8	58957	57784.6	58332	46430.9	74932.5	51379.2	57219.9	85956.5	74347.1	62648.6	106706
7.22_738.5096m/z	738.51	7.21848	neg	PE(18:2(9Z,12Z)/18:2(9Z,12Z))	LMGP02010111	Glycerophospholipids	Glycerophosphoethanolamines	Diacylglycerophosphoethanolamines	PE			38.6	9.82	M-H	C41H74NO8P	2.22873	12283.3	11413.9	9429.66	13272.5	10863.5	12802.3	10996.9	10474.9	12411.6	13261.6	15462.5	24011.9
4.61_736.4938m/z	736.494	4.60908	neg	PE(18:2(9Z,12Z)/18:3(6Z,9Z,12Z))	LMGP02010664	Glycerophospholipids	Glycerophosphoethanolamines	Diacylglycerophosphoethanolamines	PE			46.7	40.3	M-H	C41H72NO8P	2.11625	92113.3	104288	87735.5	87428.5	96939.6	105673	145801	84053.7	99366.9	64931.1	77456.5	69238.8
6.25_738.5069m/z	738.507	6.25327	pos	PE(18:2(9Z,12Z)/18:3(9Z,12Z,15Z))	LMGP02010665	Glycerophospholipids	Glycerophosphoethanolamines	Diacylglycerophosphoethanolamines	PE			53.5	75.3	M+H	C41H72NO8P	0.145994	175516	191464	165777	183265	118237	162007	118018	166590	220185	207665	157525	308589
5.06_806.4974m/z	806.497	5.05927	neg	PE(18:2(9Z,12Z)/20:5(5Z,8Z,11Z,14Z,17Z))	LMGP02010673	Glycerophospholipids	Glycerophosphoethanolamines	Diacylglycerophosphoethanolamines	PE			37.8	6.78	M+FA-H	C43H72NO8P	-0.442104	9086.56	8855.88	8626.68	9023.22	11583	14828.1	17890.7	9093.88	7135.76	6801.14	9143.92	5946.64
6.32_836.5553m/z	836.555	6.31943	pos	PE(18:2(9Z,12Z)/22:1(11Z))	LMGP02010676	Glycerophospholipids	Glycerophosphoethanolamines	Diacylglycerophosphoethanolamines	PE			41.5	12.9	M+K	C45H84NO8P	-1.64587	1.65885e+06	1.61795e+06	1.66739e+06	1.58328e+06	1.71952e+06	1.90792e+06	2.14099e+06	2.053e+06	1.70037e+06	1.81266e+06	1.67896e+06	1.68584e+06
6.25_736.4938m/z	736.494	6.2473	neg	PE(18:3(6Z,9Z,12Z)/18:2(9Z,12Z))	LMGP02010692	Glycerophospholipids	Glycerophosphoethanolamines	Diacylglycerophosphoethanolamines	PE			42.2	25.4	M-H	C41H72NO8P	2.09559	9138.2	9505.9	9607.17	11252.8	8254.29	12002.7	9922.49	10811.5	10654.6	10182.8	11587.7	19649.7
4.23_734.4783m/z	734.478	4.22925	neg	PE(18:3(6Z,9Z,12Z)/18:3(6Z,9Z,12Z))	LMGP02010693	Glycerophospholipids	Glycerophosphoethanolamines	Diacylglycerophosphoethanolamines	PE			40.6	14.3	M-H	C41H70NO8P	2.23712	14375.1	15757.5	17515.7	16319	15163	29856.8	22320	17835	20517.4	18618.4	14309.8	11622.7
4.61_804.4815m/z	804.481	4.60908	neg	PE(18:3(6Z,9Z,12Z)/20:5(5Z,8Z,11Z,14Z,17Z))	LMGP02010703	Glycerophospholipids	Glycerophosphoethanolamines	Diacylglycerophosphoethanolamines	PE			41.3	23.8	M+FA-H	C43H70NO8P	-0.851772	5200.91	5812.27	4418.32	6345.96	4715.23	7386.04	8062.16	4232.78	5873.27	3399.15	2761.72	4341.48
4.12_828.4930m/z	828.493	4.11985	pos	PE(18:3(6Z,9Z,12Z)/22:4(7Z,10Z,13Z,16Z))	LMGP02010708	Glycerophospholipids	Glycerophosphoethanolamines	Diacylglycerophosphoethanolamines	PE	**	C00350	38.3	0	M+K	C45H76NO8P	-1.2274	64648.4	62991.9	56800	63834.9	42769.1	33274.1	48224.8	45170.3	89782	84108.2	70718.8	74410.1
5.47_830.4978m/z	830.498	5.4688	neg	PE(18:3(6Z,9Z,12Z)/22:6(4Z,7Z,10Z,13Z,16Z,19Z))	LMGP02010709	Glycerophospholipids	Glycerophosphoethanolamines	Diacylglycerophosphoethanolamines	PE			37.1	0	M+FA-H	C45H72NO8P	0.0844573	9253.72	8257.01	8130.96	8898	9993.95	2956.08	2870.76	6800.7	11049.2	7643.38	5288.36	5244
7.25_714.5069m/z	714.507	7.24642	pos	PE(18:3(9Z,12Z,15Z)/16:0)	LMGP02010047	Glycerophospholipids	Glycerophosphoethanolamines	Diacylglycerophosphoethanolamines	PE	**	C00350	52.6	72.4	M+H	C39H72NO8P	0.155067	374025	403084	380689	426552	328519	464566	331673	408518	468503	468684	337865	720678
5.06_739.5155n	740.523	5.0634	pos	PE(18:3(9Z,12Z,15Z)/18:1(9Z))	LMGP02011190	Glycerophospholipids	Glycerophosphoethanolamines	Diacylglycerophosphoethanolamines	PE			39.5	3.05	M+H, M+NH4, M+Na	C41H74NO8P	0.417425	676262	616885	649872	656147	763348	842944	907156	792652	593253	536681	569657	489738
5.30_758.4758m/z	758.476	5.30083	neg	PE(18:3(9Z,12Z,15Z)/20:5(5Z,8Z,11Z,14Z,17Z))	LMGP02010731	Glycerophospholipids	Glycerophosphoethanolamines	Diacylglycerophosphoethanolamines	PE			37.4	0	M-H	C43H70NO8P	-1.05594	1304.6	1148.67	1078.52	1376.79	1054.99	0.00851239	423.349	1162.81	1068.03	1295.51	973.057	623.497
5.29_828.4826m/z	828.483	5.28555	neg	PE(18:4(6Z,9Z,12Z,15Z)/22:6(4Z,7Z,10Z,13Z,16Z,19Z))	LMGP02010768	Glycerophospholipids	Glycerophosphoethanolamines	Diacylglycerophosphoethanolamines	PE			36.4	0	M+FA-H	C45H70NO8P	0.664932	927.972	1362.22	2309.27	1405.44	813.882	761.083	341.268	1253.37	874.527	1060.3	1359.3	611.012
11.05_828.6467m/z	828.647	11.0466	pos	PE(20:0/22:2(13Z,16Z))	LMGP02010839	Glycerophospholipids	Glycerophosphoethanolamines	Diacylglycerophosphoethanolamines	PE			37.1	0	M+H	C47H90NO8P	-1.15477	60222.9	41813.5	65372.8	59864.2	82877.9	96319.8	51220.7	72664.2	66584.9	133506	102603	248185
6.72_862.5711m/z	862.571	6.71762	pos	PE(20:2(11Z,14Z)/22:2(13Z,16Z))	LMGP02010899	Glycerophospholipids	Glycerophosphoethanolamines	Diacylglycerophosphoethanolamines	PE			38.8	5.42	M+K	C47H86NO8P	-1.36618	180542	142255	161253	164161	152384	171948	189881	164093	190483	183252	185758	217882
5.07_832.5137m/z	832.514	5.06797	neg	PE(20:3(8Z,11Z,14Z)/20:5(5Z,8Z,11Z,14Z,17Z))	LMGP02010926	Glycerophospholipids	Glycerophosphoethanolamines	Diacylglycerophosphoethanolamines	PE	**	C00350	37.2	0	M+FA-H	C45H74NO8P	0.400475	6512.67	10432.5	10291.2	11999.5	20290.2	8900.17	7450.96	13798.4	10381.7	9734.73	8140.24	7301.26
5.68_860.5551m/z	860.555	5.6813	pos	PE(20:5(5Z,8Z,11Z,14Z,17Z)/22:0)	LMGP02010987	Glycerophospholipids	Glycerophosphoethanolamines	Diacylglycerophosphoethanolamines	PE			36.6	1.18	M+K	C47H84NO8P	-1.80292	252979	259413	252921	279143	258831	315744	326154	281921	311697	302996	276183	297656
10.48_838.5759m/z	838.576	10.4772	pos	PE(22:2(13Z,16Z)/18:0)	LMGP02011082	Glycerophospholipids	Glycerophosphoethanolamines	Diacylglycerophosphoethanolamines	PE	**	C00350	36.5	0	M+K	C45H86NO8P	4.58056	83693	94239.3	91100.9	72735.2	76886.5	67729.5	103235	56212.5	59173.3	98160.8	74350.8	52026.1
4.93_832.5244m/z	832.524	4.93227	pos	PE(22:2(13Z,16Z)/18:3(9Z,12Z,15Z))	LMGP02011086	Glycerophospholipids	Glycerophosphoethanolamines	Diacylglycerophosphoethanolamines	PE	**	C00350	38.5	6.01	M+K	C45H80NO8P	-1.19773	192846	170232	158362	198291	86259	142610	135901	164271	204827	196028	182700	208539
2.89_452.2793m/z	452.279	2.89225	neg	PE(0:0/16:0)	LMGP02050036	Glycerophospholipids	Glycerophosphoethanolamines	Monoacylglycerophosphoethanolamines	LPE			37.9	0	M-H	C21H44NO7P	2.39301	3132.06	3036.21	3460.64	3156.31	2007.58	2807.99	2367.38	2505.07	4654.98	4773.76	3367.96	4686.38
2.33_482.3245m/z	482.324	2.33127	pos	PE(0:0/18:0)	LMGP02050038	Glycerophospholipids	Glycerophosphoethanolamines	Monoacylglycerophosphoethanolamines	LPE			37.5	0	M+H	C23H48NO7P	0.773027	3237.88	2810.76	2996.5	3276.22	2713.21	2696.21	3918.21	2916.22	4081.27	3801.48	3146.12	3687.14
2.42_478.2931m/z	478.293	2.41983	pos	PE(0:0/18:2(9Z,12Z))	LMGP02050041	Glycerophospholipids	Glycerophosphoethanolamines	Monoacylglycerophosphoethanolamines	LPE			38.7	0	M+H	C23H44NO7P	0.613065	3093.48	3439.75	3115.92	2717.33	1866.91	2665.44	2133.58	2689.38	4001	5397.49	4142.05	3620.59
7.04_1053.5991m/z	1053.6	7.03928	neg	PE(0:0/22:5(4Z,7Z,10Z,13Z,16Z))	LMGP02050058	Glycerophospholipids	Glycerophosphoethanolamines	Monoacylglycerophosphoethanolamines	LPE			37.3	0	2M-H	C27H46NO7P	3.79024	4751.21	6388.62	6119.52	2457.82	6108.93	6518.07	6234.03	4922.9	8232.11	6612.04	11829.8	6357.22
2.88_480.3105m/z	480.311	2.8803	neg	PE(18:0/0:0)	LMGP02050001	Glycerophospholipids	Glycerophosphoethanolamines	Monoacylglycerophosphoethanolamines	LPE			37.1	0	M-H	C23H48NO7P	1.95554	1126.29	1195.38	1193.21	1113.52	520.478	894.309	955.372	1190.67	1807.26	1475.83	1135.04	1634.36
2.22_478.2932m/z	478.293	2.21853	pos	PE(18:2(9Z,12Z)/0:0)	LMGP02050011	Glycerophospholipids	Glycerophosphoethanolamines	Monoacylglycerophosphoethanolamines	LPE			46	36.6	M+H	C23H44NO7P	0.898797	4311.81	4442.91	4145.7	4565.41	2702.4	3733.41	2430.22	4768.51	7762.05	7512.21	4467.21	7657.92
1.64_474.2640m/z	474.264	1.63747	neg	PE(18:3(6Z,9Z,12Z)/0:0)	LMGP02050017	Glycerophospholipids	Glycerophosphoethanolamines	Monoacylglycerophosphoethanolamines	LPE			37.5	0	M-H	C23H42NO7P	2.83476	422.606	455.374	470.649	412.8	117.618	263.576	170.067	353.506	708.57	729.548	290.294	763.311
5.22_949.5347m/z	949.535	5.21658	neg	PE(18:3(9Z,12Z,15Z)/0:0)	LMGP02050029	Glycerophospholipids	Glycerophosphoethanolamines	Monoacylglycerophosphoethanolamines	LPE			37.1	0	2M-H	C23H42NO7P	2.35105	11108.8	9821.96	9030.34	7944.48	13741.4	6649.8	7549.71	11750.3	12572.1	8415.21	9895.28	8509.74
5.39_510.3553m/z	510.355	5.39418	pos	PE(20:0/0:0)	LMGP02050012	Glycerophospholipids	Glycerophosphoethanolamines	Monoacylglycerophosphoethanolamines	LPE			37.4	0	M+H	C25H52NO7P	-0.188211	15940.5	15252.4	15038.6	16625.4	15010.6	12423.8	14166.2	15567.3	12579.5	3988.71	16795.3	14137.7
3.55_611.3924m/z	611.392	3.54548	pos	PG(12:0/12:0)	LMGP04010035	Glycerophospholipids	Glycerophosphoglycerols	Diacylglycerophosphoglycerols	PG			38.1	0	M+H	C30H59O10P	0.86875	12224.1	24845.6	16490	17413.8	19662.8	3807.5	19580.4	18046	17857.5	14952.3	21149.8	19736.4
3.63_665.4392m/z	665.439	3.6334	pos	PG(12:0/16:1(9Z))	LMGP04010049	Glycerophospholipids	Glycerophosphoglycerols	Diacylglycerophosphoglycerols	PG			38.2	0	M+H	C34H65O10P	0.619846	5189.01	8882.15	5496.55	5546.15	7569.81	12077.2	3891.16	12085.2	1537.2	5365	6054.16	3822.37
2.89_669.4133m/z	669.413	2.88942	pos	PG(12:0/18:4(6Z,9Z,12Z,15Z))	LMGP04010056	Glycerophospholipids	Glycerophosphoglycerols	Diacylglycerophosphoglycerols	PG			37.7	0	M+H-H2O	C36H63O10P	1.03143	28755.8	28051.3	28874	25454.1	31819	26763.7	28124	27773.5	40312.8	39064.6	30774.3	28427.3
3.93_695.4306m/z	695.431	3.93377	neg	PG(12:0/20:4(5Z,8Z,11Z,14Z))	LMGP04010062	Glycerophospholipids	Glycerophosphoglycerols	Diacylglycerophosphoglycerols	PG			43.2	23.8	M-H2O-H	C38H67O10P	1.815	21320.7	20677.7	19696.3	25271.3	36909.6	40849.1	19804.2	52439.3	7441.15	9598.5	22848.7	12341.2
3.99_639.4236m/z	639.424	3.9882	pos	PG(14:0/12:0)	LMGP04010932	Glycerophospholipids	Glycerophosphoglycerols	Diacylglycerophosphoglycerols	PG			40.7	11.9	M+H	C32H63O10P	0.726297	111884	122270	128141	114946	65674.1	37354.9	37434.4	104828	179068	248239	199017	89863.9
4.63_667.4552m/z	667.455	4.62518	pos	PG(14:0/14:0)	LMGP04010005	Glycerophospholipids	Glycerophosphoglycerols	Diacylglycerophosphoglycerols	PG			38	0	M+H	C34H67O10P	1.07336	14193.4	11248	8639.23	6159.46	13828.6	5492.74	6293.54	19793.8	21794.7	10786.5	9994.98	10371.3
3.22_645.4156m/z	645.416	3.22143	pos	PG(14:1(9Z)/14:1(9Z))	LMGP04010920	Glycerophospholipids	Glycerophosphoglycerols	Diacylglycerophosphoglycerols	PG			37.8	0	M+H-H2O	C34H63O10P	4.46238	28959	25017.6	23320.9	26448.7	23882	19823.1	20655.3	19202.5	25576.8	25501.4	28128	22306.4
5.01_695.4292m/z	695.429	5.0106	neg	PG(14:1(9Z)/18:3(6Z,9Z,12Z))	LMGP04010122	Glycerophospholipids	Glycerophosphoglycerols	Diacylglycerophosphoglycerols	PG			38.1	0	M-H2O-H	C38H67O10P	-0.27047	8330.98	7252.59	7198.57	8225.88	12411.9	6798.93	6094.78	8171.28	10613	10879.5	10376.3	10894.8
3.79_714.4479n	715.455	3.78845	pos	PG(14:1(9Z)/18:3(9Z,12Z,15Z))	LMGP04010123	Glycerophospholipids	Glycerophosphoglycerols	Diacylglycerophosphoglycerols	PG			37.2	0	M+H-H2O, M+H	C38H67O10P	1.0062	26033	29673.7	24998.4	24213.1	29427.4	10329.5	10583.2	35797.2	33206.9	25360.9	43731.1	24363.6
4.03_667.4551m/z	667.455	4.03117	pos	PG(16:0/12:0)	LMGP04010025	Glycerophospholipids	Glycerophosphoglycerols	Diacylglycerophosphoglycerols	PG			37.8	0	M+H	C34H67O10P	0.919204	32647.6	37227.8	27690.4	39035.1	38542	15155	21555.1	50555.6	33694.6	34019.1	28528.4	31906.8
6.01_740.5459m/z	740.546	6.00995	pos	PG(16:0/16:0)	LMGP04010986	Glycerophospholipids	Glycerophosphoglycerols	Diacylglycerophosphoglycerols	PG			39.9	12.7	M+NH4	C38H75O10P	3.16885	106622	91436.3	98154.1	100299	98813.3	140193	71148.4	60203.6	111279	86199.4	191713	85591.7
6.78_746.5097n	764.544	6.78392	pos	PG(16:0/18:2(9Z,12Z))	LMGP04010983	Glycerophospholipids	Glycerophosphoglycerols	Diacylglycerophosphoglycerols	PG			49.8	57.7	M+NH4, M+Na, M+H	C40H75O10P	-0.0593152	697808	683823	623313	693147	592713	684161	594800	792560	800053	686090	946020	833339
6.34_744.4939n	762.528	6.34228	pos	PG(16:0/18:3(6Z,9Z,12Z))	LMGP04010906	Glycerophospholipids	Glycerophosphoglycerols	Diacylglycerophosphoglycerols	PG			46.7	42.2	M+NH4, M+Na, M+H	C40H73O10P	-0.261317	346525	338991	324449	331972	338867	504955	297091	515951	443147	488555	598045	432625
5.94_744.4940n	762.528	5.94473	pos	PG(16:0/18:3(9Z,12Z,15Z))	LMGP04010973	Glycerophospholipids	Glycerophosphoglycerols	Diacylglycerophosphoglycerols	PG			49.3	54.9	M+NH4, M+Na, M+H	C40H73O10P	-0.136834	574193	583906	584712	546303	397956	601753	440767	772318	625574	630343	724302	724804
4.84_753.5061m/z	753.506	4.8447	pos	PG(16:0/20:4(5Z,8Z,11Z,14Z))	LMGP04010036	Glycerophospholipids	Glycerophosphoglycerols	Diacylglycerophosphoglycerols	PG			37.8	0	M+H-H2O	C42H75O10P	-0.521404	58242.5	30583.4	41939.4	29971.5	38887	69967.1	53857.4	52850.9	71201.8	49537.6	66237.4	62334.9
7.40_746.5101n	764.544	7.40228	pos	PG(16:1(9Z)/18:1(9Z))	LMGP04010902	Glycerophospholipids	Glycerophosphoglycerols	Diacylglycerophosphoglycerols	PG			36.9	0	M+H, M+NH4	C40H75O10P	0.375987	212095	190567	214771	222707	160585	224384	124688	232533	200103	210409	271210	283797
6.34_743.4885m/z	743.488	6.33905	neg	PG(16:1(9Z)/18:2(9Z,12Z))	LMGP04010901	Glycerophospholipids	Glycerophosphoglycerols	Diacylglycerophosphoglycerols	PG			47.6	46.5	M-H	C40H73O10P	2.19103	58728	53534.8	54081.5	53455.7	84289.2	120512	73941.9	128971	64309.7	83015.3	94918.9	77682
5.09_760.5122m/z	760.512	5.08592	pos	PG(16:1(9Z)/18:3(6Z,9Z,12Z))	LMGP04010212	Glycerophospholipids	Glycerophosphoglycerols	Diacylglycerophosphoglycerols	PG			36.4	0	M+NH4	C40H71O10P	-0.0920238	21280.2	25186.1	20193.2	16457	11188.4	5531.62	12032.7	14519.1	14495.4	19210.8	17708.4	15348.1
5.59_742.4785n	760.512	5.59423	pos	PG(16:1(9Z)/18:3(9Z,12Z,15Z))	LMGP04010213	Glycerophospholipids	Glycerophosphoglycerols	Diacylglycerophosphoglycerols	PG			54.4	74.7	M+NH4, M+Na, M+H	C40H71O10P	-0.0263461	2.72444e+06	2.55794e+06	2.61421e+06	2.51981e+06	1.73865e+06	2.06313e+06	1.92145e+06	2.17534e+06	3.18208e+06	3.12946e+06	4.1603e+06	3.40963e+06
6.77_813.4915m/z	813.491	6.77493	neg	PG(16:1(9Z)/20:4(5Z,8Z,11Z,14Z))	LMGP04010899	Glycerophospholipids	Glycerophosphoglycerols	Diacylglycerophosphoglycerols	PG			36.4	0	M+FA-H	C42H73O10P	-1.10157	2486.46	3375.98	2364.81	5278.64	2172.52	7079.71	3496.95	6270.05	4278.91	7425.14	9128.09	2962.99
5.51_740.5463m/z	740.546	5.50535	pos	PG(18:0/14:0)	LMGP04010027	Glycerophospholipids	Glycerophosphoglycerols	Diacylglycerophosphoglycerols	PG			38.6	1.67	M+NH4	C38H75O10P	3.67856	344317	364172	358632	348104	313101	378995	327113	342465	323296	356844	469086	336774
7.97_748.5256n	766.559	7.97443	pos	PG(18:1(9Z)/16:0)	LMGP04010962	Glycerophospholipids	Glycerophosphoglycerols	Diacylglycerophosphoglycerols	PG			52.2	63	M+NH4, M+Na, M+H	C40H77O10P	0.174707	6.99183e+06	7.35624e+06	7.17841e+06	7.42424e+06	5.45097e+06	7.09821e+06	6.31595e+06	8.10629e+06	6.40611e+06	6.68318e+06	8.49455e+06	7.46546e+06
3.66_715.4549m/z	715.455	3.65548	pos	PG(18:3(6Z,9Z,12Z)/14:1(9Z))	LMGP04010369	Glycerophospholipids	Glycerophosphoglycerols	Diacylglycerophosphoglycerols	PG			36.7	0	M+H	C38H67O10P	0.567332	5985.9	6687.62	7051.64	6294.78	6775.06	8018.45	6492.07	13307.1	4353.63	2545.01	10176.8	15194
5.93_743.4884m/z	743.488	5.93468	neg	PG(18:3(6Z,9Z,12Z)/16:0)	LMGP04010372	Glycerophospholipids	Glycerophosphoglycerols	Diacylglycerophosphoglycerols	PG			43.3	22.2	M-H	C40H73O10P	2.05627	97967.9	115752	106382	99737.2	72226.5	112975	93040.5	131313	110588	106611	127830	122779
5.61_809.4607m/z	809.461	5.60892	neg	PG(18:3(6Z,9Z,12Z)/18:4(6Z,9Z,12Z,15Z))	LMGP04010382	Glycerophospholipids	Glycerophosphoglycerols	Diacylglycerophosphoglycerols	PG			44	33.9	M+FA-H	C42H69O10P	-0.41672	33891.1	28988.3	27950.7	28583.9	18000.5	30183.2	16831.2	33280.8	27438.5	31131.5	51025.8	29875.6
4.07_699.4595m/z	699.459	4.07487	pos	PG(18:3(9Z,12Z,15Z)/14:0)	LMGP04010399	Glycerophospholipids	Glycerophosphoglycerols	Diacylglycerophosphoglycerols	PG			38.8	0.68	M+H-H2O	C38H69O10P	-0.0955328	51699.2	56637.5	49316.3	54839.7	75159.5	127671	61820.2	147752	12339.6	15933.8	42705.1	22833.7
4.12_697.4441m/z	697.444	4.11985	pos	PG(18:3(9Z,12Z,15Z)/14:1(9Z))	LMGP04010400	Glycerophospholipids	Glycerophosphoglycerols	Diacylglycerophosphoglycerols	PG			36.3	0	M+H-H2O	C38H67O10P	0.280819	5846.4	7471.51	5568.65	8324.32	8037.73	8510.63	4623.69	10792.4	7269.38	6041.98	17776.1	4609.58
2.60_687.4239m/z	687.424	2.599	pos	PG(18:4(6Z,9Z,12Z,15Z)/12:0)	LMGP04010425	Glycerophospholipids	Glycerophosphoglycerols	Diacylglycerophosphoglycerols	PG			37.2	0	M+H	C36H63O10P	1.09702	23261.7	19173.6	18565.6	18785.8	24295.2	19059	20100.1	20495.1	19803.7	22691.1	16892.6	17426.1
3.94_697.4442m/z	697.444	3.94317	pos	PG(18:4(6Z,9Z,12Z,15Z)/14:0)	LMGP04010427	Glycerophospholipids	Glycerophosphoglycerols	Diacylglycerophosphoglycerols	PG			41.3	10.7	M+H-H2O	C38H67O10P	0.385848	236957	237532	252481	252247	414460	429788	347903	562293	90631.3	108466	256698	155456
7.91_722.5101n	740.544	7.9107	pos	PG(20:0/12:0)	LMGP04010867	Glycerophospholipids	Glycerophosphoglycerols	Diacylglycerophosphoglycerols	PG			37.3	0	M+NH4, M+Na	C38H75O10P	0.485844	168837	146411	86989.9	106223	248563	363344	228831	303468	126392	187349	156377	181318
3.81_899.6163m/z	899.616	3.81068	pos	PG(20:0/22:1(11Z))	LMGP04010525	Glycerophospholipids	Glycerophosphoglycerols	Diacylglycerophosphoglycerols	PG			36	0	M+K	C48H93O10P	2.94901	21181.9	25986.2	23470.5	24703	24335.6	12413.2	7946	22786.9	14559.2	17593.3	9911.82	14094.4
0.73_887.6752m/z	887.675	0.729467	pos	PG(22:0/22:2(13Z,16Z))	LMGP04010723	Glycerophospholipids	Glycerophosphoglycerols	Diacylglycerophosphoglycerols	PG			36.5	0	M+H	C50H95O10P	1.81657	55474.4	51103.9	59189.1	61600.8	73821.9	68541.7	80413.2	38179.6	56641.8	97859.7	49632.2	99449.3
5.81_909.5020m/z	909.502	5.81213	pos	PG(22:4(7Z,10Z,13Z,16Z)/22:6(4Z,7Z,10Z,13Z,16Z,19Z))	LMGP04010978	Glycerophospholipids	Glycerophosphoglycerols	Diacylglycerophosphoglycerols	PG			38.4	10.3	M+K	C50H79O10P	-2.60987	238501	267714	216418	264952	386877	230736	204287	383205	152388	213275	219965	158779
3.70_847.4895m/z	847.49	3.70265	neg	PG(22:6(4Z,7Z,10Z,13Z,16Z,19Z)/22:6(4Z,7Z,10Z,13Z,16Z,19Z))	LMGP04010977	Glycerophospholipids	Glycerophosphoglycerols	Diacylglycerophosphoglycerols	PG			38.7	5.33	M-H2O-H	C50H75O10P	-2.79419	90402.3	91317.8	112181	87297.7	142705	78852.5	90095.4	143561	66150	77932.5	79641.8	93742.6
1.05_446.2530m/z	446.253	1.05283	pos	PG(12:0/0:0)	LMGP04050011	Glycerophospholipids	Glycerophosphoglycerols	Monoacylglycerophosphoglycerols	LPG			38.5	0.468	M+NH4	C18H37O9P	3.79556	185120	168876	192992	185429	191514	214191	198604	192035	175452	185127	191377	169470
1.07_439.2447m/z	439.245	1.07478	pos	PG(14:0/0:0)	LMGP04050012	Glycerophospholipids	Glycerophosphoglycerols	Monoacylglycerophosphoglycerols	LPG			37.3	0.0768	M+H-H2O	C20H41O9P	-1.91556	44056.8	44150.8	45269.3	55466.7	40883.6	25645.7	14006.6	58844.1	43140.5	39015.9	43397.8	51525.2
0.74_435.2166m/z	435.217	0.74395	neg	PG(14:1(9Z)/0:0)	LMGP04050035	Glycerophospholipids	Glycerophosphoglycerols	Monoacylglycerophosphoglycerols	LPG			37.2	0	M-H2O-H	C20H39O9P	2.75563	573.747	600.245	414.203	843.032	247.247	355.761	994.325	834.832	488.615	685.11	470.972	263.682
1.32_502.3162m/z	502.316	1.31505	pos	PG(16:0/0:0)	LMGP04050008	Glycerophospholipids	Glycerophosphoglycerols	Monoacylglycerophosphoglycerols	LPG			38.2	4.15	M+NH4	C22H45O9P	4.70237	522253	560551	526276	559392	514174	727438	445878	436703	671478	555492	651662	540788
1.91_481.2586m/z	481.259	1.9117	neg	PG(16:1(9Z)/0:0)	LMGP04050013	Glycerophospholipids	Glycerophosphoglycerols	Monoacylglycerophosphoglycerols	LPG			44.5	30	M-H	C22H43O9P	2.89313	12704.3	12633.3	12571.9	12590.4	11456.2	11997.1	9014.86	14204.4	17929	15904.7	22628.2	18191.8
3.29_530.3475m/z	530.348	3.28522	pos	PG(18:0/0:0)	LMGP04050009	Glycerophospholipids	Glycerophosphoglycerols	Monoacylglycerophosphoglycerols	LPG			37.7	0.386	M+NH4	C24H49O9P	4.49034	48304.2	58451.9	61629.7	57882.7	68290.9	23179.9	32335.8	41814.1	22209.2	43648.2	41867.7	56480.8
5.26_511.3039m/z	511.304	5.26138	pos	PG(18:1(9Z)/0:0)	LMGP04050006	Glycerophospholipids	Glycerophosphoglycerols	Monoacylglycerophosphoglycerols	LPG			37.8	0	M+H	C24H47O9P	1.74549	10206.6	9976.63	9679.88	8716.14	8267.81	6526.65	9720.09	13209.7	15201	5713.02	6320.69	10560.9
1.96_507.2740m/z	507.274	1.9572	neg	PG(18:2(9Z,12Z)/0:0)	LMGP04050014	Glycerophospholipids	Glycerophosphoglycerols	Monoacylglycerophosphoglycerols	LPG			37.2	0	M-H	C24H45O9P	2.17815	1427.68	1614.23	1493.31	1700.39	691.459	1762.46	1361.5	1363.95	2495.8	2352.71	2488.49	2061.65
1.45_506.2649n	489.262	1.44515	pos	PG(18:3(6Z,9Z,12Z)/0:0)	LMGP04050020	Glycerophospholipids	Glycerophosphoglycerols	Monoacylglycerophosphoglycerols	LPG			37.9	0	M+H-H2O, M+H	C24H43O9P	0.907728	8267.26	6786.59	7597.09	7697.79	3471.63	4870.44	5409.21	5835.47	11762.3	9602.03	12971.9	9490.34
2.91_507.2713m/z	507.271	2.91145	pos	PG(18:3(9Z,12Z,15Z)/0:0)	LMGP04050032	Glycerophospholipids	Glycerophosphoglycerols	Monoacylglycerophosphoglycerols	LPG			37.7	0	M+H	C24H43O9P	-0.887278	10534.1	14086	16782.2	13480.2	18540.4	14113.9	16742	18253	16680.1	16108	13691.9	15178.7
3.57_530.2670n	531.274	3.5682	pos	PG(20:5(5Z,8Z,11Z,14Z,17Z)/0:0)	LMGP04050030	Glycerophospholipids	Glycerophosphoglycerols	Monoacylglycerophosphoglycerols	LPG			37.8	0.00306	M+Na, M+K, M+H	C26H43O9P	4.69993	1.49571e+06	1.48914e+06	1.52492e+06	1.52065e+06	1.15422e+06	1.4587e+06	1.49141e+06	1.31606e+06	1.95865e+06	1.38457e+06	1.88473e+06	1.462e+06
2.60_607.3358m/z	607.336	2.599	pos	PG(22:0/0:0)	LMGP04050028	Glycerophospholipids	Glycerophosphoglycerols	Monoacylglycerophosphoglycerols	LPG			39	0	M+K	C28H57O9P	-2.34741	16204.8	16492.7	14928.8	14762.3	7245.09	10186.2	14662.4	7685.77	15927.8	19938.4	13110	18642.4
4.27_757.4268m/z	757.427	4.27362	pos	PI(12:0/18:4(6Z,9Z,12Z,15Z))	LMGP06010024	Glycerophospholipids	Glycerophosphoinositols	Diacylglycerophosphoinositols	PI			36.7	0	M+H-H2O	C39H67O13P	-2.40463	63337.7	70920.8	71164.2	86362.5	64935.5	76859.3	52539.7	51720.3	71222.8	51626.3	122648	63333.5
5.01_829.4891m/z	829.489	5.0106	neg	PI(12:0/22:4(7Z,10Z,13Z,16Z))	LMGP06010035	Glycerophospholipids	Glycerophosphoinositols	Diacylglycerophosphoinositols	PI			37.3	0	M-H	C43H75O13P	2.19053	3801.16	3928.48	3276.58	3770.82	2092.83	3975.97	2230.2	1745.68	2922.15	4975.37	8275.89	4769.77
3.43_725.4283m/z	725.428	3.42943	neg	PI(14:0/12:0)	LMGP06010903	Glycerophospholipids	Glycerophosphoinositols	Diacylglycerophosphoinositols	PI			36.9	0	M-H	C35H67O13P	4.9652	6066.25	7039.82	4870.46	4820.26	4537.62	5632.11	5224.8	3373.26	6465.27	4065.11	5754.26	5425.12
4.82_785.4597m/z	785.46	4.82272	pos	PI(14:1(9Z)/18:3(6Z,9Z,12Z))	LMGP06010090	Glycerophospholipids	Glycerophosphoinositols	Diacylglycerophosphoinositols	PI			41.5	11.1	M+H-H2O	C41H71O13P	-0.307612	122673	122240	110596	112365	52114	44457.5	111217	54541.7	208963	185942	169023	154701
5.64_813.4917m/z	813.492	5.63938	pos	PI(14:1(9Z)/20:3(8Z,11Z,14Z))	LMGP06010098	Glycerophospholipids	Glycerophosphoinositols	Diacylglycerophosphoinositols	PI			37.2	0	M+H-H2O	C43H75O13P	0.549292	9504.27	15675.1	11956.3	18401.4	12394.6	28614.4	15505.9	6888.57	11523.6	16780.8	18106.1	24513.2
5.11_856.5100n	874.544	5.1075	pos	PI(14:1(9Z)/22:4(7Z,10Z,13Z,16Z))	LMGP06010105	Glycerophospholipids	Glycerophosphoinositols	Diacylglycerophosphoinositols	PI			36	0	M+NH4, M+Na, M+H	C45H77O13P	-0.18134	91674.8	97422.2	91241	91700.4	68958.2	101932	99756.3	87375.3	80788.4	75190.1	141846	90193.4
2.55_833.5160m/z	833.516	2.5542	pos	PI(16:0/16:0)	LMGP06010007	Glycerophospholipids	Glycerophosphoinositols	Diacylglycerophosphoinositols	PI		C00626	37.6	0	M+Na	C41H79O13P	1.22118	13940.6	11709.9	10918.8	12686.2	17592.6	33058.8	14169.7	24270	591.092	894.003	2613.43	1683.07
7.93_791.5076m/z	791.508	7.93232	pos	PI(16:0/16:1(9Z))	LMGP06010881	Glycerophospholipids	Glycerophosphoinositols	Diacylglycerophosphoinositols	PI		C00626	37	0	M+H-H2O	C41H77O13P	0.841568	13889.5	21106.3	22764.9	18012.4	14575.5	12734.8	21847.2	23480.8	27028.9	12498.8	16814	23009.9
7.65_835.5364m/z	835.536	7.64932	neg	PI(16:0/18:1(9Z))	LMGP06010001	Glycerophospholipids	Glycerophosphoinositols	Diacylglycerophosphoinositols	PI			38.8	10	M-H	C43H81O13P	2.65305	29286.8	25907.7	21664.5	20959.9	20844	28520.5	24779.7	27730.1	14954.3	16396.1	25544.2	21132.6
6.50_834.5261n	852.56	6.49735	pos	PI(16:0/18:2(9Z,12Z))	LMGP06010959	Glycerophospholipids	Glycerophosphoinositols	Diacylglycerophosphoinositols	PI			50.6	58.3	M+NH4, M+Na, M+H	C43H79O13P	0.342619	1.56075e+06	1.55551e+06	1.49567e+06	1.58669e+06	1.41899e+06	1.97559e+06	1.77045e+06	1.73428e+06	1.2464e+06	1.49443e+06	2.19169e+06	1.9711e+06
7.97_862.5577n	880.592	7.97443	pos	PI(16:0/20:2(11Z,14Z))	LMGP06010165	Glycerophospholipids	Glycerophosphoinositols	Diacylglycerophosphoinositols	PI			37.1	0	M+H, M+NH4	C45H83O13P	0.627038	318550	318132	291423	326095	282801	325320	301761	244156	181000	328714	410166	429727
6.74_859.5342m/z	859.534	6.73953	pos	PI(16:0/20:4(5Z,8Z,11Z,14Z))	LMGP06010958	Glycerophospholipids	Glycerophosphoinositols	Diacylglycerophosphoinositols	PI			36.8	0	M+H	C45H79O13P	1.29908	19293.4	32613.7	44140.6	44674.3	34075.9	21550.6	25020.9	36055.1	43017.9	37866.5	32986.5	43120.4
6.76_837.5527m/z	837.553	6.76163	pos	PI(16:1(9Z)/18:0)	LMGP06010179	Glycerophospholipids	Glycerophosphoinositols	Diacylglycerophosphoinositols	PI			36.4	0	M+H	C43H81O13P	4.70494	220783	228627	233652	262540	231116	150719	153586	226019	265786	202574	234214	207815
5.51_813.4909m/z	813.491	5.50535	pos	PI(16:1(9Z)/18:3(6Z,9Z,12Z))	LMGP06010180	Glycerophospholipids	Glycerophosphoinositols	Diacylglycerophosphoinositols	PI			37	0	M+H-H2O	C43H75O13P	-0.405365	26466.1	29552.7	26899.7	32933.5	10671.1	14701	26600.6	7621.43	41991.7	42446.3	29756.7	39499
5.73_899.4923m/z	899.492	5.7336	neg	PI(16:1(9Z)/20:5(5Z,8Z,11Z,14Z,17Z))	LMGP06010188	Glycerophospholipids	Glycerophosphoinositols	Diacylglycerophosphoinositols	PI			39.7	7.77	M+FA-H	C45H75O13P	-0.482105	31576.3	36278.5	29909.8	33270.4	30869.7	54628	33699.7	45248.6	33658.4	31105.3	42344.8	45471.4
10.62_871.5731m/z	871.573	10.6168	pos	PI(16:1(9Z)/22:2(13Z,16Z))	LMGP06010192	Glycerophospholipids	Glycerophosphoinositols	Diacylglycerophosphoinositols	PI			49.3	57.9	M+H-H2O	C47H85O13P	4.00527	2.34746e+08	2.32074e+08	2.36806e+08	2.3853e+08	2.27099e+08	2.21816e+08	2.56215e+08	2.36626e+08	2.03458e+08	2.90644e+08	2.2278e+08	3.00063e+08
8.00_885.5516m/z	885.552	7.99613	pos	PI(16:1(9Z)/22:4(7Z,10Z,13Z,16Z))	LMGP06010193	Glycerophospholipids	Glycerophosphoinositols	Diacylglycerophosphoinositols	PI			39.4	6.12	M+H	C47H81O13P	3.27182	602408	554239	525650	577132	481220	554938	469661	678909	469066	483289	622078	640802
4.67_821.4555m/z	821.455	4.6686	pos	PI(18:0/12:0)	LMGP06010860	Glycerophospholipids	Glycerophosphoinositols	Diacylglycerophosphoinositols	PI			37.4	0	M+K	C39H75O13P	-2.84283	65382.2	68970.8	67823.9	67858.2	54540	63349.3	53964.3	60423.3	73516	75885.4	89458.4	64274.3
6.61_859.5360m/z	859.536	6.60507	neg	PI(18:0/18:3(6Z,9Z,12Z))	LMGP06010283	Glycerophospholipids	Glycerophosphoinositols	Diacylglycerophosphoinositols	PI			36.5	0	M-H	C45H81O13P	2.09739	10437.2	11037.9	13154.4	8897.76	6446.95	9539.67	6596.82	11973.6	6175.28	4197.95	11426.5	9024.19
4.20_913.5855m/z	913.586	4.2008	neg	PI(18:0/22:4(7Z,10Z,13Z,16Z))	LMGP06010853	Glycerophospholipids	Glycerophosphoinositols	Diacylglycerophosphoinositols	PI			37	0	M-H	C49H87O13P	4.79249	6203.78	7701.4	6155.92	7312.22	9858.46	13141.2	6617.51	3256.43	16608.4	6049.07	11787.7	10002.2
5.73_857.5203m/z	857.52	5.7336	neg	PI(18:1(9Z)/18:3(6Z,9Z,12Z))	LMGP06010298	Glycerophospholipids	Glycerophosphoinositols	Diacylglycerophosphoinositols	PI			38.8	6.24	M-H	C45H79O13P	2.05148	26879.5	25431.2	24533.7	27002.4	20548.7	31354.3	23592.2	26229.9	22858.7	19637.5	31855.2	27216.4
7.34_885.5525m/z	885.552	7.3367	pos	PI(18:1(9Z)/20:4(5Z,8Z,11Z,14Z))	LMGP06010849	Glycerophospholipids	Glycerophosphoinositols	Diacylglycerophosphoinositols	PI			37.2	0.0048	M+H	C47H81O13P	4.22251	656718	723310	624841	744461	731385	681190	655053	824816	611393	713630	802174	825111
6.29_916.6082n	915.601	6.29337	neg	PI(18:1(9Z)/22:2(13Z,16Z))	LMGP06010306	Glycerophospholipids	Glycerophosphoinositols	Diacylglycerophosphoinositols	PI			38.2	0	M-H, M+FA-H	C49H89O13P	4.4617	116057	137112	121489	105513	169647	208867	126829	121781	156490	119512	152356	144333
6.51_833.5205m/z	833.521	6.50925	neg	PI(18:2(9Z,12Z)/16:0)	LMGP06010847	Glycerophospholipids	Glycerophosphoinositols	Diacylglycerophosphoinositols	PI			46.1	35.2	M-H	C43H79O13P	2.37639	447635	531156	340024	402497	441138	639113	675211	560534	356631	366608	540342	523978
5.10_855.5048m/z	855.505	5.10063	neg	PI(18:2(9Z,12Z)/18:3(6Z,9Z,12Z))	LMGP06010319	Glycerophospholipids	Glycerophosphoinositols	Diacylglycerophosphoinositols	PI			39.9	8.64	M-H	C45H77O13P	2.18227	35994.1	43894.7	35168.1	37946.6	27885.9	43946	42654.7	36003.8	32155.9	30565.3	58620.7	43712.8
4.62_853.4887m/z	853.489	4.6219	neg	PI(18:2(9Z,12Z)/18:4(6Z,9Z,12Z,15Z))	LMGP06010321	Glycerophospholipids	Glycerophosphoinositols	Diacylglycerophosphoinositols	PI			39.5	8.36	M-H	C45H75O13P	1.72913	19463.9	23319.2	18459.1	20861.6	10661.9	10081.3	17668.6	13064.6	18445.4	13989.9	35840.5	21164.3
4.73_916.6063n	939.596	4.73468	pos	PI(18:2(9Z,12Z)/22:1(11Z))	LMGP06010331	Glycerophospholipids	Glycerophosphoinositols	Diacylglycerophosphoinositols	PI			44.5	32.7	M+Na, M+K, M+NH4	C49H89O13P	2.44686	2.83544e+07	2.77961e+07	2.80444e+07	2.77767e+07	2.48803e+07	2.51807e+07	2.28974e+07	2.13078e+07	3.64001e+07	3.00483e+07	3.24932e+07	3.09785e+07
4.67_914.5896n	937.579	4.6686	pos	PI(18:2(9Z,12Z)/22:2(13Z,16Z))	LMGP06010332	Glycerophospholipids	Glycerophosphoinositols	Diacylglycerophosphoinositols	PI			36.9	0	M+Na, M+K, M+NH4, M+H	C49H87O13P	1.28733	415943	435826	436609	424723	358218	491233	359675	262257	657437	239433	461141	457713
5.73_831.5049m/z	831.505	5.7336	neg	PI(18:3(6Z,9Z,12Z)/16:0)	LMGP06010340	Glycerophospholipids	Glycerophosphoinositols	Diacylglycerophosphoinositols	PI			48.3	46.2	M-H	C43H77O13P	2.4354	383134	457370	364666	396943	402572	640809	427000	495050	386771	349294	469413	479794
4.63_854.4959n	872.53	4.62518	pos	PI(18:3(6Z,9Z,12Z)/18:3(6Z,9Z,12Z))	LMGP06010348	Glycerophospholipids	Glycerophosphoinositols	Diacylglycerophosphoinositols	PI			36.8	0	M+NH4, M+Na	C45H75O13P	1.60242	47835.5	61304.8	55500.2	59024.9	19928.8	59017.5	47604	36833.8	43768.2	43016.8	83730	60841.5
6.30_916.6064n	939.596	6.29753	pos	PI(18:3(6Z,9Z,12Z)/22:0)	LMGP06010360	Glycerophospholipids	Glycerophosphoinositols	Diacylglycerophosphoinositols	PI			37.2	0	M+Na, M+K	C49H89O13P	2.52725	159914	188304	165026	170404	177147	226478	117822	114076	248540	146918	240042	135396
5.73_832.5100n	850.544	5.72568	pos	PI(18:3(9Z,12Z,15Z)/16:0)	LMGP06010926	Glycerophospholipids	Glycerophosphoinositols	Diacylglycerophosphoinositols	PI			49.3	64.7	M+NH4, M+Na, M+H	C43H77O13P	-0.215152	1.4726e+06	1.49016e+06	1.49469e+06	1.54831e+06	1.28681e+06	1.88035e+06	1.69021e+06	1.64474e+06	1.16271e+06	1.39214e+06	2.12767e+06	1.78034e+06
10.48_886.5609n	887.568	10.4772	pos	PI(18:4(6Z,9Z,12Z,15Z)/20:0)	LMGP06010412	Glycerophospholipids	Glycerophosphoinositols	Diacylglycerophosphoinositols	PI			41.4	17.6	M+H, M+Na	C47H83O13P	4.29954	1.49435e+06	1.84074e+06	1.80659e+06	2.03154e+06	1.53974e+06	1.07491e+06	1.14702e+06	1.5063e+06	2.80171e+06	2.29195e+06	2.24276e+06	2.23584e+06
4.75_916.6072n	915.6	4.75082	neg	PI(20:0/20:3(8Z,11Z,14Z))	LMGP06010490	Glycerophospholipids	Glycerophosphoinositols	Diacylglycerophosphoinositols	PI			38.9	3.12	M-H, M+FA-H	C49H89O13P	3.45854	1.57158e+06	1.80459e+06	1.67407e+06	1.59854e+06	2.28724e+06	2.25306e+06	1.73448e+06	1.66197e+06	2.16598e+06	1.41286e+06	1.93215e+06	1.91667e+06
4.68_913.5852m/z	913.585	4.6824	neg	PI(20:0/20:4(5Z,8Z,11Z,14Z))	LMGP06010831	Glycerophospholipids	Glycerophosphoinositols	Diacylglycerophosphoinositols	PI			36.9	5.65	M-H	C49H87O13P	4.41097	357302	394643	407359	363335	452098	465513	398288	302521	556885	284618	452788	426024
4.62_911.5696m/z	911.57	4.6219	neg	PI(20:1(11Z)/20:4(5Z,8Z,11Z,14Z))	LMGP06010518	Glycerophospholipids	Glycerophosphoinositols	Diacylglycerophosphoinositols	PI		C00626	36	0	M-H	C49H85O13P	4.53182	7897.99	11037.3	8103.85	8012.49	8384.72	7419.02	10048.3	7179.21	16435.7	5875.29	11749	10779.2
10.90_944.6335n	927.63	10.9031	pos	PI(20:1(11Z)/22:2(13Z,16Z))	LMGP06010523	Glycerophospholipids	Glycerophosphoinositols	Diacylglycerophosphoinositols	PI			37.2	0	M+H-H2O, M+NH4	C51H93O13P	-1.9733	639943	712418	638472	637122	626928	576474	550595	579218	654262	666020	760168	682925
4.75_937.5827m/z	937.583	4.75082	neg	PI(20:2(11Z,14Z)/22:4(7Z,10Z,13Z,16Z))	LMGP06010555	Glycerophospholipids	Glycerophosphoinositols	Diacylglycerophosphoinositols	PI			36.9	3.1	M-H	C51H87O13P	1.67997	12436.2	14084.4	16100.9	12094	12695.1	15740.6	11007.1	9511.86	15132.4	10637.7	18179.5	17170.9
6.03_971.5020m/z	971.502	6.0316	pos	PI(20:3(8Z,11Z,14Z)/22:6(4Z,7Z,10Z,13Z,16Z,19Z))	LMGP06010587	Glycerophospholipids	Glycerophosphoinositols	Diacylglycerophosphoinositols	PI			37.2	0	M+K	C51H81O13P	-2.87823	145564	148634	180726	147104	255323	166273	183348	183360	189145	182806	124209	137185
6.51_901.5081m/z	901.508	6.50925	neg	PI(20:4(5Z,8Z,11Z,14Z)/16:1(9Z))	LMGP06010594	Glycerophospholipids	Glycerophosphoinositols	Diacylglycerophosphoinositols	PI			39.1	5.67	M+FA-H	C45H77O13P	-0.283063	42573.7	48444.8	28671.1	33548.5	36534.9	59633	57169.2	49943.4	30109.6	30443.2	51832.7	49256.7
6.52_879.4968m/z	879.497	6.51845	pos	PI(20:5(5Z,8Z,11Z,14Z,17Z)/16:0)	LMGP06010623	Glycerophospholipids	Glycerophosphoinositols	Diacylglycerophosphoinositols	PI			37.5	4.7	M+Na	C45H77O13P	-2.99292	151629	167151	150987	142525	123327	222853	210025	174144	117592	142320	219499	195068
4.52_985.6061m/z	985.606	4.52333	neg	PI(20:5(5Z,8Z,11Z,14Z,17Z)/22:0)	LMGP06010642	Glycerophospholipids	Glycerophosphoinositols	Diacylglycerophosphoinositols	PI			38.7	17.4	M+FA-H	C51H89O13P	4.09679	27207.1	33230.4	34983.6	26348.7	22252.9	32649.5	29404.4	18565.3	49337.9	25287.9	34635.3	30248.7
9.52_937.6132m/z	937.613	9.52488	neg	PI(21:0/22:4(7Z,10Z,13Z,16Z))	LMGP06010670	Glycerophospholipids	Glycerophosphoinositols	Diacylglycerophosphoinositols	PI			37	0.238	M-H2O-H	C52H93O13P	-4.48768	111096	117052	111288	109255	185150	153531	162263	143672	132249	152538	140795	138183
0.65_949.6728m/z	949.673	0.6479	neg	PI(22:0/20:0)	LMGP06010685	Glycerophospholipids	Glycerophosphoinositols	Diacylglycerophosphoinositols	PI			48.8	52.4	M-H	C51H99O13P	-2.34596	49129.1	52357.4	51280.3	46278.5	47217.7	39280.1	41834	48638.1	44541.4	51105.1	37836.7	42745
7.86_1019.6851m/z	1019.69	7.86065	neg	PI(22:0/22:2(13Z,16Z))	LMGP06010692	Glycerophospholipids	Glycerophosphoinositols	Diacylglycerophosphoinositols	PI			41.3	21.4	M+FA-H	C53H99O13P	4.68993	30194	28412.7	25966.3	24723.9	12726.2	14176.8	20251.4	12436.7	71299.8	53153.6	40585	55560.9
7.65_1019.6850m/z	1019.69	7.64932	neg	PI(22:1(11Z)/22:1(11Z))	LMGP06010721	Glycerophospholipids	Glycerophosphoinositols	Diacylglycerophosphoinositols	PI			37	0	M+FA-H	C53H99O13P	4.60565	14991.2	14342.3	9374.57	12087.3	6428.29	9518.01	6223.18	7056.47	32595.5	22399.1	21807.2	25370.7
9.84_884.5451n	885.552	9.83995	pos	PI(22:4(7Z,10Z,13Z,16Z)/16:1(9Z))	LMGP06010763	Glycerophospholipids	Glycerophosphoinositols	Diacylglycerophosphoinositols	PI			38.5	4.79	M+H, M+Na	C47H81O13P	4.13851	1.88811e+06	1.72501e+06	1.84472e+06	1.86415e+06	2.09973e+06	1.93323e+06	2.21136e+06	1.99664e+06	1.63552e+06	2.19055e+06	1.84817e+06	2.34023e+06
9.96_927.5060m/z	927.506	9.95693	neg	PI(22:6(4Z,7Z,10Z,13Z,16Z,19Z)/20:5(5Z,8Z,11Z,14Z,17Z))	LMGP06010809	Glycerophospholipids	Glycerophosphoinositols	Diacylglycerophosphoinositols	PI			36.1	0	M-H	C51H77O13P	3.30314	199346	218960	222656	317898	125801	197584	106210	111136	222836	201343	224362	302777
2.00_571.2907m/z	571.291	1.99617	neg	PI(16:0/0:0)	LMGP06050002	Glycerophospholipids	Glycerophosphoinositols	Monoacylglycerophosphoinositols	LPI			36.3	0	M-H	C25H49O12P	3.23598	701.844	967.136	826.055	817.387	415.203	1371.48	1696.97	541.975	429.848	696.186	957.226	467.769
2.02_581.3093m/z	581.309	2.01527	pos	PI(18:1(9Z)/0:0)	LMGP06050005	Glycerophospholipids	Glycerophosphoinositols	Monoacylglycerophosphoinositols	LPI			38.8	0	M+H-H2O	C27H51O12P	1.24157	4967.51	5282.72	4297.69	5615.38	6088.47	9600.68	8277.99	8885.01	734.622	1333.25	1640.31	2560.62
10.62_593.2751m/z	593.275	10.6168	pos	PI(18:4(6Z,9Z,12Z,15Z)/0:0)	LMGP06050017	Glycerophospholipids	Glycerophosphoinositols	Monoacylglycerophosphoinositols	LPI			37.3	0	M+H	C27H45O12P	4.9468	27307.8	42154.8	40475.1	18504	45285.5	52254.9	45673.5	55404.4	21383.4	79410.8	45712.3	65550
0.93_662.3307m/z	662.331	0.9278	pos	PI(22:6(4Z,7Z,10Z,13Z,16Z,19Z)/0:0)	LMGP06050012	Glycerophospholipids	Glycerophosphoinositols	Monoacylglycerophosphoinositols	LPI			38	0	M+NH4	C31H49O12P	1.12683	3359.01	3016.44	2826.51	1747.64	2775.29	3888.3	3410.1	1211.23	2643.35	2238.41	5702.25	1801.94
3.33_650.4053m/z	650.405	3.32978	pos	PS(12:0/14:1(9Z))	LMGP03010046	Glycerophospholipids	Glycerophosphoserines	Diacylglycerophosphoserines	PS			37.1	0	M+H	C32H60NO10P	3.9056	5859.1	5443.73	6445.62	8908.65	3155.49	8847.87	9661.21	6441.85	7356.22	6443.86	13727	5250.84
6.97_696.4081m/z	696.408	6.97132	neg	PS(14:0/12:0)	LMGP03010931	Glycerophospholipids	Glycerophosphoserines	Diacylglycerophosphoserines	PS			37.9	0	M+FA-H	C32H62NO10P	-1.85192	54854.1	54840.8	50938.1	57645	46309.3	42290.5	49076.3	50944.7	52604.8	59143.8	57167.7	63973.7
10.10_752.4706m/z	752.471	10.0974	neg	PS(14:0/16:0)	LMGP03010983	Glycerophospholipids	Glycerophosphoserines	Diacylglycerophosphoserines	PS			36.2	0.0164	M+FA-H	C36H70NO10P	-1.84129	7847.14	11081	9785.19	9809.12	9928.33	6539.51	6099.65	8115.49	9918.34	7681.81	9581.17	6052.92
10.51_780.5021m/z	780.502	10.5096	neg	PS(14:0/18:0)	LMGP03010928	Glycerophospholipids	Glycerophosphoserines	Diacylglycerophosphoserines	PS			37	1.45	M+FA-H	C38H74NO10P	-1.55658	39979.1	33881.3	32346.3	32065.2	29417	33359.8	26524.5	25538.7	36786.8	37402.1	48094.4	54664.6
9.71_753.5400m/z	753.54	9.71243	pos	PS(16:0/16:0)	LMGP03010029	Glycerophospholipids	Glycerophosphoserines	Diacylglycerophosphoserines	PS			38.3	8.31	M+NH4	C38H74NO10P	1.55608	791491	840467	707906	844984	780587	882840	845321	718981	678724	665373	785517	647696
10.83_808.5334m/z	808.533	10.8287	neg	PS(16:0/18:0)	LMGP03010906	Glycerophospholipids	Glycerophosphoserines	Diacylglycerophosphoserines	PS			38.1	0	M+FA-H	C40H78NO10P	-1.48704	166568	190008	175671	177445	185425	167980	147945	174785	176635	211278	176393	196241
1.79_854.5269m/z	854.527	1.78898	pos	PS(16:0/22:2(13Z,16Z))	LMGP03010200	Glycerophospholipids	Glycerophosphoserines	Diacylglycerophosphoserines	PS			37.5	0	M+K	C44H82NO10P	-4.81864	28873.5	29277.5	28018.1	26510.2	54019.3	45899.1	32727.3	60705.8	8734.94	11268.8	18553.9	14292.9
5.41_788.4872m/z	788.487	5.40853	neg	PS(16:0/22:6(4Z,7Z,10Z,13Z,16Z,19Z))	LMGP03010043	Glycerophospholipids	Glycerophosphoserines	Diacylglycerophosphoserines	PS			40.2	17.2	M-H2O-H	C44H74NO10P	-0.00335837	11987.1	11768.2	9737.22	10831.4	16706.8	7383.94	5901.31	7263.33	11234.1	15797.8	11753.1	10086.7
10.46_806.5180m/z	806.518	10.464	neg	PS(16:1(9Z)/18:0)	LMGP03010211	Glycerophospholipids	Glycerophosphoserines	Diacylglycerophosphoserines	PS			37.6	1.88	M+FA-H	C40H76NO10P	-1.19454	146841	117081	133570	139645	134171	136079	120141	140489	135103	145884	151891	152474
5.32_816.5185m/z	816.518	5.31652	neg	PS(18:0/22:6(4Z,7Z,10Z,13Z,16Z,19Z))	LMGP03010040	Glycerophospholipids	Glycerophosphoserines	Diacylglycerophosphoserines	PS	**	C02737	41.7	18.9	M-H2O-H	C46H78NO10P	-0.034486	33021.6	34970.9	28307.4	26529.1	62742.2	33459.1	42609.1	49296.6	26233	40430	29166.1	29174.6
11.17_936.6099m/z	936.61	11.1685	pos	PS(22:1(11Z)/22:2(13Z,16Z))	LMGP03010753	Glycerophospholipids	Glycerophosphoserines	Diacylglycerophosphoserines	PS			36	0	M+K	C50H92NO10P	0.908697	54793.5	53110.7	47748	78512.5	108929	73601.6	75203.3	55434.6	43423.8	101659	54997.8	72250.9
0.77_532.3039m/z	532.304	0.772833	pos	PS(20:2(11Z,14Z)/0:0)	LMGP03050021	Glycerophospholipids	Glycerophosphoserines	Monoacylglycerophosphoserines	LPS			38.7	0	M+H-H2O	C26H48NO9P	0.908686	2505.77	1677.21	2169.54	1982.78	3119.46	3139.45	699.861	5578.47	1647.08	1880.05	1926.14	1812.53
3.13_548.3005m/z	548.301	3.13363	pos	PS(20:3(8Z,11Z,14Z)/0:0)	LMGP03050022	Glycerophospholipids	Glycerophosphoserines	Monoacylglycerophosphoserines	LPS			37.7	0	M+H	C26H46NO9P	4.07947	27873.8	26203.2	30057.9	29776.2	33397.2	51730.2	20870	38268.1	28170.3	27137.8	66596.2	23388.1
3.13_561.2960m/z	561.296	3.13363	pos	PS(20:5(5Z,8Z,11Z,14Z,17Z)/0:0)	LMGP03050027	Glycerophospholipids	Glycerophosphoserines	Monoacylglycerophosphoserines	LPS			37.4	0	M+NH4	C26H42NO9P	4.55657	22517.7	21196.1	14543.2	22951.1	24411.7	40241.3	13944.3	32606.6	20283.4	12539.7	36956.2	11641.2
3.26_600.3249m/z	600.325	3.26413	pos	PS(22:2(13Z,16Z)/0:0)	LMGP03050024	Glycerophospholipids	Glycerophosphoserines	Monoacylglycerophosphoserines	LPS			53.5	77.7	M+Na	C28H52NO9P	-3.94371	580787	512334	488413	529605	399905	420324	497377	405692	534499	633567	561569	669154
11.00_683.6429n	684.65	11.0049	pos	Cer(t18:0)/24:0(2OH[R]))	LMSP02030026	Sphingolipids	Ceramides	N-acyl-4-hydroxysphinganines (phytoceramides)	Cer			50.6	55.8	M+H, M+Na	C42H85NO5	0.219766	2.19823e+06	2.12422e+06	2.22334e+06	2.24029e+06	4.18528e+06	2.81123e+06	2.35295e+06	2.95024e+06	1.82551e+06	2.75481e+06	2.45977e+06	3.04731e+06
7.76_571.5174n	572.525	7.7552	pos	Cer(t18:0/16:0(2OH))	LMSP02030015	Sphingolipids	Ceramides	N-acyl-4-hydroxysphinganines (phytoceramides)	Cer			48.3	51.3	M+H, M+Na	C34H69NO5	-0.229488	148388	168398	148008	151238	200371	194553	176324	172640	118300	154412	153131	171679
8.35_555.5232n	556.53	8.34652	pos	Cer(t18:0/16:0)	LMSP02030001	Sphingolipids	Ceramides	N-acyl-4-hydroxysphinganines (phytoceramides)	Cer			52.1	68.4	M+H, M+Na	C34H69NO4	0.954518	458377	476525	457528	450406	518058	482496	451862	450913	431144	572910	572181	522032
10.30_672.5795m/z	672.579	10.3043	neg	Cer(t18:0/20:0(2OH))	LMSP02030017	Sphingolipids	Ceramides	N-acyl-4-hydroxysphinganines (phytoceramides)	Cer			36.9	0	M+FA-H	C38H77NO5	1.75409	1108.68	684.102	783.29	860.671	1608.09	728.201	1462.04	590.762	304.879	1545.78	905.762	366.605
10.67_655.6121n	700.61	10.669	neg	Cer(t18:0/22:0(2OH))	LMSP02030018	Sphingolipids	Ceramides	N-acyl-4-hydroxysphinganines (phytoceramides)	Cer			53.5	73.9	M-H, M+FA-H	C40H81NO5	0.940439	148395	180583	152542	168261	192046	158387	167903	177024	108133	198749	156918	175833
10.80_639.6167n	640.624	10.8004	pos	Cer(t18:0/22:0)	LMSP02030008	Sphingolipids	Ceramides	N-acyl-4-hydroxysphinganines (phytoceramides)	Cer			49.9	58.7	M+H, M+Na	C40H81NO4	0.281488	698518	638007	656506	631680	1.06158e+06	812022	636494	637287	558940	1.00104e+06	763417	958422
11.01_682.6362m/z	682.636	11.0116	neg	Cer(t18:0/24:0(2OH))	LMSP02030002	Sphingolipids	Ceramides	N-acyl-4-hydroxysphinganines (phytoceramides)	Cer			52.8	68.3	M-H	C42H85NO5	1.00779	115602	130267	128367	128020	142752	126627	109788	148686	116361	137356	120617	144842
11.13_667.6480n	668.655	11.1297	pos	Cer(t18:0/24:0)	LMSP02030004	Sphingolipids	Ceramides	N-acyl-4-hydroxysphinganines (phytoceramides)	Cer			55.3	79.4	M+H, M+Na	C42H85NO4	0.160642	4.33599e+06	4.22732e+06	4.04389e+06	4.33349e+06	6.77817e+06	5.20623e+06	4.1587e+06	4.47746e+06	4.03283e+06	6.08365e+06	5.70498e+06	5.74869e+06
11.35_710.6674m/z	710.667	11.3545	neg	Cer(t18:0/26:0(2OH))	LMSP02030003	Sphingolipids	Ceramides	N-acyl-4-hydroxysphinganines (phytoceramides)	Cer			52.3	68.6	M-H	C44H89NO5	0.907438	43266.2	50231.5	51564.2	47174.1	56806.4	47930.2	50780.9	60756.4	35274.4	47016.6	47507.9	56074.2
11.47_695.6793n	696.687	11.4733	pos	Cer(t18:0/26:0)	LMSP02030005	Sphingolipids	Ceramides	N-acyl-4-hydroxysphinganines (phytoceramides)	Cer			55.6	81.2	M+H, M+Na	C44H89NO4	0.235405	2.75114e+06	2.75026e+06	2.73203e+06	2.86887e+06	4.98603e+06	3.81751e+06	2.76851e+06	3.03753e+06	2.70683e+06	4.6445e+06	4.26349e+06	4.93962e+06
10.56_725.6530n	708.65	10.5593	pos	Cer(t18:1(8E)/26:0(2OH[R])(3OH))	LMSP02030027	Sphingolipids	Ceramides	N-acyl-4-hydroxysphinganines (phytoceramides)	Cer			49.4	61.6	M+H-H2O, M+K	C44H87NO6	-0.482066	608514	518229	543561	597205	702015	493052	568269	596707	484835	597511	592371	588120
10.92_709.6584n	710.666	10.9215	pos	Cer(t18:1(8E)/26:0(2OH[R]))	LMSP02030029	Sphingolipids	Ceramides	N-acyl-4-hydroxysphinganines (phytoceramides)	Cer			56.2	86.4	M+H-H2O, M+H	C44H87NO5	-0.00492298	3.69308e+06	4.00138e+06	3.877e+06	4.17087e+06	4.06503e+06	3.26194e+06	3.21726e+06	3.2426e+06	4.91434e+06	5.30184e+06	5.10349e+06	5.13754e+06
10.09_625.5648n	626.572	10.0909	pos	Cer(t18:1(8Z)/20:0(2OH[R]))	LMSP02030025	Sphingolipids	Ceramides	N-acyl-4-hydroxysphinganines (phytoceramides)	Cer			54	81.5	M+H, M+Na	C38H75NO5	0.365233	256865	239116	254643	268525	351130	247965	289493	259631	237514	271930	263556	284179
10.68_678.6013m/z	678.601	10.6789	pos	Cer(t20:0/20:0(2OH))	LMSP02030021	Sphingolipids	Ceramides	N-acyl-4-hydroxysphinganines (phytoceramides)	Cer			37.6	0	M+Na	C40H81NO5	0.970097	74633.8	53394.5	50793.2	57418.3	144950	124541	94655.3	74217.1	68647.6	67938	78956.2	83248.4
10.76_664.6251m/z	664.625	10.7603	neg	Cer(t20:0/22:0(2OH))	LMSP02030022	Sphingolipids	Ceramides	N-acyl-4-hydroxysphinganines (phytoceramides)	Cer			36.7	0	M-H2O-H	C42H85NO5	0.253303	6085.2	4318.98	8806.36	7215.65	5577.88	4035.93	4624.22	7616.64	6135.21	6070.18	8452.66	6914.27
11.35_711.6736n	712.681	11.3501	pos	Cer(t20:0/24:0(2OH))	LMSP02030023	Sphingolipids	Ceramides	N-acyl-4-hydroxysphinganines (phytoceramides)	Cer			49.9	57.6	M+H, M+Na	C44H89NO5	-0.625417	888363	944932	936646	911410	1.73174e+06	1.36078e+06	1.15078e+06	1.25568e+06	728363	1.1284e+06	1.06717e+06	1.4191e+06
11.83_768.7103m/z	768.71	11.8345	neg	Cer(t20:0/26:0)	LMSP02030014	Sphingolipids	Ceramides	N-acyl-4-hydroxysphinganines (phytoceramides)	Cer			42.3	25.1	M+FA-H	C46H93NO4	2.22183	12146.1	11574.9	13266.1	12713.7	11122	10579.3	8522.78	13762.2	10711.5	12089.7	10220.6	16370.4
10.60_682.6342m/z	682.634	10.5981	pos	Cer(t26:1(20E)/16:0(2OH[R]))	LMSP02030028	Sphingolipids	Ceramides	N-acyl-4-hydroxysphinganines (phytoceramides)	Cer			53.8	72.2	M+H	C42H83NO5	-0.278253	4.8018e+06	4.73425e+06	4.66813e+06	4.79188e+06	7.17824e+06	5.49856e+06	5.26314e+06	5.11215e+06	4.21108e+06	5.47364e+06	5.1724e+06	5.97718e+06
10.05_512.5039m/z	512.504	10.0474	pos	Cer(d18:0/14:0)	LMSP02020016	Sphingolipids	Ceramides	N-acylsphinganines (dihydroceramides)	Cer			39.4	1.13	M+H	C32H65NO3	0.390552	2.54329e+06	2.4018e+06	2.56312e+06	2.49817e+06	3.56543e+06	3.93093e+06	2.4011e+06	2.26241e+06	2.7255e+06	3.0298e+06	3.53996e+06	3.27561e+06
8.37_555.5230n	600.522	8.36848	neg	Cer(d18:0/16:0(2OH))	LMSP02020029	Sphingolipids	Ceramides	N-acylsphinganines (dihydroceramides)	Cer			45.2	33.8	M-H, M+FA-H	C34H69NO4	0.636957	88359	84493.8	82139.7	84793.6	84380.4	93959.9	86503.8	90723.8	69227.7	87994.2	91721.3	80659.6
10.48_540.5352m/z	540.535	10.4772	pos	Cer(d18:0/16:0)	LMSP02020001	Sphingolipids	Ceramides	N-acylsphinganines (dihydroceramides)	Cer			45.4	31.9	M+H	C34H69NO3	0.284131	3.95501e+06	3.92689e+06	3.93816e+06	3.96856e+06	4.93773e+06	5.46394e+06	3.7681e+06	3.75287e+06	4.24703e+06	4.40229e+06	5.19059e+06	4.92669e+06
11.17_640.6238m/z	640.624	11.1685	pos	Cer(d18:0/22:0(2OH))	LMSP02020032	Sphingolipids	Ceramides	N-acylsphinganines (dihydroceramides)	Cer			36.8	0	M+H	C40H81NO4	0.00628639	75631.1	72799.6	98829.9	71135	80190	127142	70352.1	76158.1	82896.2	84973	106762	76278.8
11.62_624.6291m/z	624.629	11.6221	pos	Cer(d18:0/22:0)	LMSP02020010	Sphingolipids	Ceramides	N-acylsphinganines (dihydroceramides)	Cer			41.5	20.8	M+H	C40H81NO3	0.275997	530496	564156	581656	552528	585389	572000	568606	651232	554432	560720	559017	511044
11.13_666.6415m/z	666.641	11.1259	neg	Cer(d18:0/h24:0)	LMSP02020017	Sphingolipids	Ceramides	N-acylsphinganines (dihydroceramides)	Cer			45.6	43.6	M-H	C42H85NO4	1.31645	26063.1	16832.9	25337.4	25179.6	21000.4	16994.4	15403.1	17345.8	19725.8	27853.1	25742.2	29020.9
11.47_695.6798n	740.679	11.4691	neg	Cer(d18:0/h26:0)	LMSP02020018	Sphingolipids	Ceramides	N-acylsphinganines (dihydroceramides)	Cer			50.1	53.6	M-H, M+FA-H	C44H89NO4	0.933	161067	179598	176230	174743	171590	148434	135100	160320	175993	220898	200200	219439
10.88_568.5665m/z	568.566	10.8836	pos	Cer(d20:0/16:0)	LMSP02020023	Sphingolipids	Ceramides	N-acylsphinganines (dihydroceramides)	Cer			44.5	29.4	M+H	C36H73NO3	0.276473	1.59026e+06	1.60134e+06	1.82114e+06	1.6983e+06	1.82017e+06	1.81478e+06	1.81655e+06	1.78546e+06	1.59522e+06	1.64186e+06	1.64393e+06	1.67406e+06
11.25_596.5976m/z	596.598	11.2492	pos	Cer(d20:0/18:0)	LMSP02020024	Sphingolipids	Ceramides	N-acylsphinganines (dihydroceramides)	Cer			42.2	18.4	M+H	C38H77NO3	-0.0915962	1.47495e+06	1.49273e+06	1.6097e+06	1.519e+06	1.56284e+06	1.56318e+06	1.58853e+06	1.63994e+06	1.50985e+06	1.52092e+06	1.54317e+06	1.58038e+06
11.83_723.7105n	724.718	11.8323	pos	Cer(d20:0/26:0(2OH))	LMSP02020040	Sphingolipids	Ceramides	N-acylsphinganines (dihydroceramides)	Cer			47.7	50.3	M+H, M+Na	C46H93NO4	0.101644	201901	241093	209907	219886	388895	298626	230910	257344	171170	281278	270084	351030
8.29_553.5082n	598.507	8.2908	neg	Cer(d14:1(4E)/20:0(2OH))	LMSP02010068	Sphingolipids	Ceramides	N-acylsphingosines (ceramides)	Cer			46.8	42.5	M-H, M+FA-H	C34H67NO4	2.15662	314145	338759	324333	311200	294789	303757	355540	316505	305292	320025	317398	352436
7.56_551.4914n	534.488	7.55638	pos	Cer(d14:1(4E)/20:1(11Z)(2OH))	LMSP02010069	Sphingolipids	Ceramides	N-acylsphingosines (ceramides)	Cer			38.4	0.131	M+H-H2O, M+Na	C34H65NO4	-0.00204432	226147	220080	239776	208927	149347	162752	108119	196285	187846	245278	240475	150440
10.60_648.5353m/z	648.535	10.5981	pos	Cer(d14:1(4E)/24:0(2OH))	LMSP02010072	Sphingolipids	Ceramides	N-acylsphingosines (ceramides)	Cer			37.2	0	M+K	C38H75NO4	4.2344	136805	130064	112472	129607	156137	168509	180864	131670	125024	165860	85029.5	148675
10.62_637.6005n	638.608	10.6168	pos	Cer(d14:1(4E)/26:0(2OH))	LMSP02010073	Sphingolipids	Ceramides	N-acylsphingosines (ceramides)	Cer			50.2	57.8	M+H, M+Na	C40H79NO4	-0.606652	1.74849e+06	1.79397e+06	1.81126e+06	1.77448e+06	1.65114e+06	1.48939e+06	1.30657e+06	1.29294e+06	2.58101e+06	2.86373e+06	2.35421e+06	2.26347e+06
8.99_582.5118m/z	582.512	8.9941	neg	Cer(d14:1/20:0)	LMSP02010036	Sphingolipids	Ceramides	N-acylsphingosines (ceramides)	Cer			45.7	38.8	M+FA-H	C34H67NO3	2.74782	16971.3	15752.9	19402.9	18398	15951	13327.8	10261.2	16087	19791.2	26767	22290.9	21702.1
6.32_506.4569m/z	506.457	6.31943	pos	Cer(d14:2(4E,6E)/18:1(9Z))	LMSP02010053	Sphingolipids	Ceramides	N-acylsphingosines (ceramides)	Cer			37.2	0	M+H	C32H59NO3	0.272403	18494.1	21566.5	16310.4	16987.6	4964.91	9210.77	6920.87	12369.8	18092.4	15345.9	16126.9	6260.31
7.56_552.4987m/z	552.499	7.55638	pos	Cer(d14:2(4E,6E)/20:0(2OH))	LMSP02010076	Sphingolipids	Ceramides	N-acylsphingosines (ceramides)	Cer			36.6	0	M+H	C34H65NO4	0.0929127	23881	25726.8	25175.5	20809.3	27270.6	21773.9	23592.9	24119	22150.3	29206.3	21979.4	19393.1
10.24_654.5689m/z	654.569	10.2357	neg	Cer(d16:1(4E)/22:0(2OH))	LMSP02010085	Sphingolipids	Ceramides	N-acylsphingosines (ceramides)	Cer			49	54.8	M+FA-H	C38H75NO4	1.76215	40768.7	46657.2	42833	41643.6	32007.6	24454.5	29278.3	33288.8	47573.4	58127.9	48271.8	55658.9
10.60_637.6013n	682.6	10.601	neg	Cer(d16:1(4E)/24:0(2OH))	LMSP02010086	Sphingolipids	Ceramides	N-acylsphingosines (ceramides)	Cer			47.3	42.3	M-H, M+FA-H	C40H79NO4	0.554953	228106	227449	237321	243122	178264	147737	138558	164052	244026	298035	239756	252540
10.25_537.5125n	538.52	10.2535	pos	Cer(d16:1/18:0)	LMSP02010046	Sphingolipids	Ceramides	N-acylsphingosines (ceramides)	Cer			37.3	0	M+H, M+Na	C34H67NO3	0.713184	281133	314954	348638	322898	264990	314081	305425	328617	276573	270509	275708	297487
8.02_554.5144m/z	554.514	8.01778	pos	Cer(d18:1(8E)/16:0(2OH[R]))	LMSP02010099	Sphingolipids	Ceramides	N-acylsphingosines (ceramides)	Cer			56.6	89.8	M+H	C34H67NO4	0.178371	371966	365128	330839	366254	268129	264901	365351	282692	351440	366112	374965	341845
7.47_553.5071n	554.514	7.46807	pos	Cer(d18:1(8Z)/16:0(2OH[R]))	LMSP02010100	Sphingolipids	Ceramides	N-acylsphingosines (ceramides)	Cer			53.3	71.4	M+H, M+Na	C34H67NO4	0.220031	1.40215e+06	1.31651e+06	1.242e+06	1.25065e+06	1.03359e+06	823360	773824	1.0097e+06	1.43678e+06	1.74663e+06	1.66922e+06	1.3927e+06
8.98_537.5124n	560.501	8.98468	pos	Cer(d18:1/16:0)	LMSP02010004	Sphingolipids	Ceramides	N-acylsphingosines (ceramides)	Cer	**	C00195	47.5	47.9	M+H, M+Na	C34H67NO3	0.543777	149005	158199	153200	160248	130349	112368	100080	133245	154399	230951	197014	165203
10.96_594.5817m/z	594.582	10.9614	pos	Cer(d18:1/20:0)	LMSP02010007	Sphingolipids	Ceramides	N-acylsphingosines (ceramides)	Cer	**	C00195	36.6	0	M+H	C38H75NO3	-0.418954	36721.8	32341.6	19704.4	33693.4	21798.8	26520.1	14234.1	26789.9	14135.9	44768.6	32499.6	69254.1
10.46_644.5956m/z	644.596	10.4565	pos	Cer(d18:1/22:0)	LMSP02010008	Sphingolipids	Ceramides	N-acylsphingosines (ceramides)	Cer	**	C00195	38	0	M+Na	C40H79NO3	0.625404	11098.7	14685.8	21314.5	11385.5	13291.6	5304.82	6564.46	15212.6	14523.9	6604.15	17406.9	26860.4
8.92_536.5039m/z	536.504	8.91892	pos	Cer(d18:2/16:0)	LMSP02010024	Sphingolipids	Ceramides	N-acylsphingosines (ceramides)	Cer			37	0	M+H	C34H65NO3	0.388825	27635.7	22135.1	27772.6	31153.8	23347.4	22131.2	15079.9	22196.7	28196.4	25728.4	23758.8	14896
7.28_760.5591m/z	760.559	7.2817	neg	GlcCer(d14:1(4E)/20:0(2OH))	LMSP0501AA65	Sphingolipids	Neutral glycosphingolipids	Simple Glc series	HexCer			48.6	57.7	M+FA-H	C40H77NO9	1.53136	126385	124784	125910	167405	129664	112961	129961	103994	116623	124416	157296	118373
7.64_699.5654n	722.554	7.644	pos	GlcCer(d14:1/20:0)	LMSP0501AA42	Sphingolipids	Neutral glycosphingolipids	Simple Glc series	HexCer			37.4	0.246	M+H, M+Na	C40H77NO8	0.644446	179303	191545	166420	177234	145769	155894	159296	190037	198010	252834	223256	168785
10.13_659.5228m/z	659.523	10.1323	pos	GlcCer(d14:2(4E,6E)/16:0)	LMSP0501AA52	Sphingolipids	Neutral glycosphingolipids	Simple Glc series	HexCer			45.1	39.7	M+NH4	C36H67NO8	3.59812	877909	887074	874653	905271	856544	826875	979741	997441	848345	814871	852013	799381
5.09_712.5147m/z	712.515	5.08592	pos	GlcCer(d18:0/14:0)	LMSP0501AA28	Sphingolipids	Neutral glycosphingolipids	Simple Glc series	HexCer			39.4	5.46	M+K	C38H75NO8	3.42262	105103	110685	114581	121677	104606	151883	91341.9	95403.7	115175	97306.4	206249	106031
8.31_762.5756m/z	762.576	8.3099	neg	GlcCer(d18:0/16:0(2OH[R]))	LMSP05010075	Sphingolipids	Neutral glycosphingolipids	Simple Glc series	HexCer			36.6	0	M+FA-H	C40H79NO9	2.60537	2938.2	1944.13	1934.7	1091.63	8195.75	4686.76	5823.22	4875.28	923.34	2222.28	3954.35	2995.92
0.67_724.5691m/z	724.569	0.665467	pos	GlcCer(d18:0/16:0)	LMSP0501AA04	Sphingolipids	Neutral glycosphingolipids	Simple Glc series	HexCer			36.9	0	M+Na	C40H79NO8	-0.933038	34002.5	33907.2	38677.9	51601.4	25611.6	26645.4	43256.1	16849	23287	47726	38985	30310.5
10.19_712.6082m/z	712.608	10.1943	pos	GlcCer(d18:0/18:0)	LMSP0501AA19	Sphingolipids	Neutral glycosphingolipids	Simple Glc series	HexCer			36.3	0	M+H-H2O	C42H83NO8	-0.569299	27586.1	46134	35275.2	33118.6	34477.8	48254.3	37483.6	47698.3	9300.17	51944.5	39848.9	43664.1
11.09_864.7276m/z	864.728	11.0884	pos	GlcCer(d18:0/26:0)	LMSP0501AA25	Sphingolipids	Neutral glycosphingolipids	Simple Glc series	HexCer			38.9	0	M+Na	C50H99NO8	1.5874	721625	752500	819691	814229	743775	733789	831615	813400	717213	788617	752514	694537
10.33_800.6607m/z	800.661	10.3336	pos	GlcCer(d18:1(8E)/22:0(2OH[R]))	LMSP05010062	Sphingolipids	Neutral glycosphingolipids	Simple Glc series	HexCer			36.9	0	M+H	C46H89NO9	-0.436529	30060.4	20207.3	10340.1	25004.4	55926.5	31404.5	19887.1	220.987	12415.6	37397	34048.6	34142.6
10.67_872.6844m/z	872.684	10.669	neg	GlcCer(d18:1(8E)/24:0(2OH[R]))	LMSP05010063	Sphingolipids	Neutral glycosphingolipids	Simple Glc series	HexCer			37.7	9.63	M+FA-H	C48H93NO9	1.41263	12451.9	15505.7	13733.3	12237.8	7153.31	15363.8	14543.9	16275.2	4129.75	18742.7	6543.41	16857.6
7.29_715.5599n	716.567	7.29102	pos	GlcCer(d18:1(8Z)/16:0(2OH[R]))	LMSP05010068	Sphingolipids	Neutral glycosphingolipids	Simple Glc series	HexCer			51	59.6	M+H, M+Na	C40H77NO9	0.0299847	4.48835e+06	4.6382e+06	4.73803e+06	4.61605e+06	5.2319e+06	4.64279e+06	5.36558e+06	4.84171e+06	4.44524e+06	4.74186e+06	4.60956e+06	4.83893e+06
12.34_817.6841m/z	817.684	12.3394	pos	GlcCer(d18:1(8Z)/22:0(2OH[R]))	LMSP05010072	Sphingolipids	Neutral glycosphingolipids	Simple Glc series	HexCer			36.7	0	M+NH4	C46H89NO9	-4.27318	44949.7	50257.6	59951.5	48912.7	31627.9	41143.9	49402.2	58692	55366.5	80089.8	66930.8	62867.7
10.68_850.6744m/z	850.674	10.6789	pos	GlcCer(d18:1(8Z)/24:0(2OH[R]))	LMSP05010073	Sphingolipids	Neutral glycosphingolipids	Simple Glc series	HexCer			37.3	0	M+Na	C48H93NO9	0.152269	24958	25814.7	29137.9	11589.7	89583.8	67531.5	40581.3	43607.7	39082.6	66560.3	26923.6	42837.1
7.65_744.5652m/z	744.565	7.64932	neg	GlcCer(d18:1/16:0)	LMSP0501AA03	Sphingolipids	Neutral glycosphingolipids	Simple Glc series	HexCer	**	C01190	42.4	25.6	M+FA-H	C40H77NO8	2.96125	24523.3	22254	17667.3	19957.7	20170.8	22625.1	22156.7	25140.1	21751.1	31235.8	21826.4	19059.6
10.46_756.6348m/z	756.635	10.4565	pos	GlcCer(d18:1/20:0)	LMSP0501AA06	Sphingolipids	Neutral glycosphingolipids	Simple Glc series	HexCer	**	C01190	38	0.133	M+H	C44H85NO8	-0.0391554	2.61932e+06	2.60123e+06	2.87412e+06	2.58467e+06	2.59102e+06	2.51338e+06	2.7696e+06	2.9595e+06	2.45061e+06	2.62057e+06	2.39009e+06	2.54285e+06
11.47_809.6763n	854.656	11.4691	neg	GlcCer(d18:1/24:1(15Z))	LMSP0501AA08	Sphingolipids	Neutral glycosphingolipids	Simple Glc series	HexCer	**	C01190	37.1	0	M-H, M+FA-H	C48H91NO8	2.22926	10096.2	7148.87	6781.43	9558.79	17873.8	13713.1	6546.04	6816.41	4203.63	10901.4	8789.32	6215.07
10.51_870.6681m/z	870.668	10.5096	neg	GlcCer(d18:2(4E,8E)/24:0(2OH[R]))	LMSP05010067	Sphingolipids	Neutral glycosphingolipids	Simple Glc series	HexCer			47	45.3	M+FA-H	C48H91NO9	0.634739	35088.3	34815.1	36656.4	39689.5	30542.1	23025.9	30958.3	32191.4	34111.4	40308.4	32807	35824.3
0.58_792.5953m/z	792.595	0.5781	pos	GlcCer(d18:2(4E,8Z)/20:0(2OH[R]))	LMSP05010052	Sphingolipids	Neutral glycosphingolipids	Simple Glc series	HexCer			44.1	33.1	M+Na	C44H83NO9	-0.971534	95895.1	82240.2	126157	107305	153701	120074	133430	90396.1	59074.1	81871	84816.1	58605.9
11.01_797.6373n	842.62	11.0116	neg	GlcCer(d18:2(4E,8Z)/22:0(2OH[R]))	LMSP05010055	Sphingolipids	Neutral glycosphingolipids	Simple Glc series	HexCer			38.3	0	M-H, M+FA-H	C46H87NO9	-0.949659	33905.9	27831.7	27515.8	23656.2	63803.8	46934.9	32560.2	45814.7	19658.9	27657.2	26513.2	30323.1
10.58_663.6169n	708.616	10.578	neg	GlcCer(d18:2(4E,8Z)/24:0(2OH[R]))	LMSP05010056	Sphingolipids	Neutral glycosphingolipids	Simple Glc series	HexCer			48.6	51.8	M-H, M+FA-H	C42H81NO4	0.507853	421216	444364	484521	440821	288963	310191	310937	332133	492798	607163	466923	502009
10.58_843.6805n	888.679	10.578	neg	GlcCer(t18:1(8E)/24:0(2OH[R]))	LMSP05010058	Sphingolipids	Neutral glycosphingolipids	Simple Glc series	HexCer			57.2	88.2	M-H, M+FA-H	C48H93NO10	0.59993	1.95693e+06	2.07373e+06	2.02765e+06	2.01025e+06	2.2943e+06	1.98503e+06	2.13321e+06	2.01455e+06	2.00722e+06	2.2478e+06	1.97017e+06	2.48099e+06
6.14_731.5561n	776.555	6.13918	neg	GlcCer(t18:1(8Z)/16:0(2OH[S]))	LMSP05010042	Sphingolipids	Neutral glycosphingolipids	Simple Glc series	HexCer			51.5	61.2	M-H, M+FA-H	C40H77NO10	1.87761	1.2171e+06	1.39535e+06	1.22835e+06	1.35621e+06	1.50475e+06	1.35119e+06	1.40825e+06	1.39235e+06	1.17662e+06	1.39224e+06	1.36226e+06	1.23371e+06
10.15_770.6143m/z	770.614	10.1515	pos	GlcCer(t18:1(8Z)/20:0(2OH[S]))	LMSP05010044	Sphingolipids	Neutral glycosphingolipids	Simple Glc series	HexCer			37.5	0	M+H-H2O	C44H85NO10	0.331283	35174.4	61272.4	90731.6	83811.3	47576.8	68437.9	79599.9	30180.2	72911.5	46712.9	47718.1	74365.4
10.24_815.6497n	860.648	10.2357	neg	GlcCer(t18:1(8Z)/22:0(2OH[S]))	LMSP05010045	Sphingolipids	Neutral glycosphingolipids	Simple Glc series	HexCer			54.5	76.8	M-H, M+FA-H	C46H89NO10	1.28816	716983	742376	762913	695928	698606	641979	746776	653575	727294	821231	757791	847012
10.90_871.7119n	916.711	10.8973	neg	GlcCer(t18:1(8Z)/26:0(2OH[R]))	LMSP05010047	Sphingolipids	Neutral glycosphingolipids	Simple Glc series	HexCer			49.2	48.4	M-H, M+FA-H	C50H97NO10	0.729153	642886	739959	708637	742691	735926	666265	634598	665679	718883	803971	787735	911283
6.28_848.5416m/z	848.542	6.27592	pos	PI-Cer(d18:0/18:0)	LMSP03030007	Sphingolipids	Phosphosphingolipids	Ceramide phosphoinositols	IPC			37.9	0	M+K	C42H84NO11P	0.267427	40837.8	36942.1	34867.1	48198	29994.6	18772.3	17290	32325.7	55832.3	48878.3	47477.2	31205.7
11.17_863.6253n	864.633	11.1685	pos	PI-Cer(d18:1/22:0)	LMSP03030001	Sphingolipids	Phosphosphingolipids	Ceramide phosphoinositols	IPC			38.1	0	M+H, M+Na	C46H90NO11P	0.158702	2.26996e+06	2.3885e+06	2.21608e+06	2.3907e+06	2.37222e+06	2.86997e+06	2.70479e+06	3.32486e+06	2.43324e+06	2.83545e+06	2.80501e+06	2.34581e+06
4.05_964.6217m/z	964.622	4.05368	pos	PI-Cer(t18:0/24:0(2OH))	LMSP03030040	Sphingolipids	Phosphosphingolipids	Ceramide phosphoinositols	IPC			36.7	0	M+K	C48H96NO13P	-3.66329	113743	91980.1	106390	110901	181864	93850.7	141294	165635	113392	94467.6	123178	136528
10.90_836.6536n	859.642	10.9031	pos	18:2-Glc-Stigmasterol	LMST01010383	Sterol lipids	Sterols	Cholesterol and derivatives	Sterols			42	13.1	M+H-H2O, M+H, M+Na, M+K	C53H88O7	0.765095	9.78616e+06	9.65579e+06	9.95693e+06	1.00313e+07	7.37675e+06	7.98996e+06	8.45919e+06	8.88021e+06	1.06749e+07	1.01411e+07	1.07498e+07	9.99952e+06
11.35_800.6527n	818.686	11.3501	pos	16:0-Glc-Campesterol	LMST01031127	Sterol lipids	Sterols	Ergosterols and C24-methyl derivatives	Sterols			40.5	10	M+NH4, M+Na	C50H88O7	-0.441081	1.01221e+06	901411	889653	981013	1.3967e+06	1.45086e+06	1.24567e+06	983287	882040	1.23628e+06	1.04535e+06	1.29618e+06
10.52_794.6066n	812.64	10.5176	pos	16:3-Glc-Campesterol	LMST01031133	Sterol lipids	Sterols	Ergosterols and C24-methyl derivatives	Sterols			38	0	M+NH4, M+Na	C50H82O7	0.67777	245216	263021	273522	287928	137186	178794	181079	191886	281656	284509	324313	298383
11.35_844.7036m/z	844.704	11.3501	pos	18:1-Glc-Campesterol	LMST01031134	Sterol lipids	Sterols	Ergosterols and C24-methyl derivatives	Sterols			36.9	0	M+NH4	C52H90O7	1.31584	138257	105097	97726.7	107470	86797	98158.8	114517	52920.6	130823	126893	117754	158816
11.07_842.6864m/z	842.686	11.0674	pos	18:2-Glc-Campesterol	LMST01031135	Sterol lipids	Sterols	Ergosterols and C24-methyl derivatives	Sterols			45.6	38.8	M+NH4	C52H88O7	-0.485376	388807	385319	353183	379932	275868	331457	351877	269000	417069	398200	399910	409569
10.80_822.6375n	840.671	10.8004	pos	18:3-Glc-Campesterol	LMST01031136	Sterol lipids	Sterols	Ergosterols and C24-methyl derivatives	Sterols			44.8	29.9	M+NH4, M+Na	C52H86O7	0.178039	4.58434e+06	4.51341e+06	4.87519e+06	4.73788e+06	2.94893e+06	3.57624e+06	3.6341e+06	3.36831e+06	4.88898e+06	5.04605e+06	4.44859e+06	4.63524e+06
8.96_669.5575m/z	669.558	8.96378	pos	16:2 Stigmasterol ester	LMST01020060	Sterol lipids	Sterols	Steryl esters	Steryl esters			36.9	0	M+Na	C45H74O2	-0.875606	33125.3	37186.3	37813.9	39159.3	43059.4	60552.9	42472.4	42362.9	28295.2	26681	35555	19538.1
12.00_629.5684m/z	629.568	12.0016	pos	16:3 Sitosterol ester	LMST01020062	Sterol lipids	Sterols	Steryl esters	Steryl esters			36.2	0	M+H-H2O	C45H74O2	4.27972	131065	160905	174416	143968	129452	150889	113342	150188	138292	145581	144735	155414
8.87_667.5419m/z	667.542	8.87457	pos	16:3 Stigmasterol ester	LMST01020063	Sterol lipids	Sterols	Steryl esters	Steryl esters			36.5	0	M+Na	C45H72O2	-0.791678	39363.7	39176.4	22433.8	24949	50596.1	54368.2	23319.5	42092.5	14470.5	26358.2	18791.3	8696.63
12.99_676.6164n	694.65	12.9902	pos	18:2 Sitosterol ester	LMST01020068	Sterol lipids	Sterols	Steryl esters	Steryl esters			43.5	25.3	M+NH4, M+Na	C47H80O2	0.89473	871420	837294	760686	789535	1.84153e+06	1.09354e+06	1.68261e+06	1.03675e+06	1.05614e+06	1.05624e+06	1.50615e+06	1.50753e+06
12.65_674.6006n	692.634	12.654	pos	18:3 Sitosterol ester	LMST01020071	Sterol lipids	Sterols	Steryl esters	Steryl esters			46.3	38.3	M+NH4, M+K, M+Na	C47H78O2	0.552094	1.13699e+06	1.05991e+06	1.03716e+06	1.05529e+06	2.12166e+06	1.24729e+06	1.8006e+06	1.24482e+06	1.38223e+06	1.36899e+06	1.76983e+06	1.66507e+06
12.68_711.6060m/z	711.606	12.6759	pos	20:3 Campesterol ester	LMST01020079	Sterol lipids	Sterols	Steryl esters	Steryl esters			37.5	0	M+Na	C48H80O2	1.41334	49108.6	41226.5	21305	51613.4	80632.9	22092.2	10910.3	38474.9	73763.5	58269.6	101867	98567.8
12.84_711.6471m/z	711.647	12.8438	pos	22:3 Stigmasterol ester	LMST01020088	Sterol lipids	Sterols	Steryl esters	Steryl esters			36.3	0	M+H-H2O	C51H84O2	4.44515	602941	615816	631615	615047	547665	629915	591075	594808	546150	612777	596135	601446
11.45_814.6691n	832.703	11.4529	pos	16:0-Glc-Sitosterol	LMST01040206	Sterol lipids	Sterols	Stigmasterols and C24-ethyl derivatives	Sterols			47.2	43	M+NH4, M+Na, M+K, M+H-H2O	C51H90O7	0.56863	9.06963e+06	8.984e+06	9.32597e+06	9.58934e+06	1.41531e+07	1.44591e+07	1.10134e+07	9.85077e+06	8.87983e+06	1.20249e+07	1.17831e+07	1.34742e+07
11.17_812.6534n	830.687	11.1685	pos	16:0-Glc-Stigmasterol	LMST01040210	Sterol lipids	Sterols	Stigmasterols and C24-ethyl derivatives	Sterols			43.5	24.6	M+NH4, M+Na	C51H88O7	0.426291	1.47979e+06	1.51157e+06	1.38824e+06	1.53647e+06	1.14675e+06	1.3543e+06	1.13465e+06	1.4334e+06	2.087e+06	1.8958e+06	2.10985e+06	1.98574e+06
11.17_857.6523m/z	857.652	11.1715	neg	16:1-Glc-Sitosterol	LMST01040214	Sterol lipids	Sterols	Stigmasterols and C24-ethyl derivatives	Sterols			36.5	1.97	M+FA-H	C51H88O7	1.37074	18817.5	24564.1	21588.9	20369.4	16372.3	18719	8455.21	20717.9	23195	32068.9	35110.1	19865.8
10.62_808.6216n	826.655	10.6168	pos	16:3-Glc-Sitosterol	LMST01040216	Sterol lipids	Sterols	Stigmasterols and C24-ethyl derivatives	Sterols			50	57.4	M+NH4, M+Na	C51H84O7	-0.0881981	3.185e+06	3.11355e+06	3.33118e+06	3.31424e+06	2.24388e+06	2.52845e+06	2.37708e+06	2.74288e+06	3.17935e+06	3.53689e+06	3.59646e+06	3.45831e+06
10.33_851.6057m/z	851.606	10.3275	neg	16:3-Glc-Stigmasterol	LMST01040228	Sterol lipids	Sterols	Stigmasterols and C24-ethyl derivatives	Sterols			38.1	0.98	M+FA-H	C51H82O7	1.79633	9789.36	6174.56	6511.14	9690.41	3417.5	1730.31	3552.68	4333.06	4833.77	11816.5	13046.9	8754.21
11.81_887.7001m/z	887.7	11.8117	neg	18:0-Glc-Sitosterol	LMST01040207	Sterol lipids	Sterols	Stigmasterols and C24-ethyl derivatives	Sterols			36.4	0	M+FA-H	C53H94O7	2.32957	5137.48	6886.8	7438.8	7672.08	6572.45	7617.07	2997.9	9297.63	7425.32	6215.67	8039.9	9977.82
11.47_840.6843n	858.718	11.4733	pos	18:1-Glc-Sitosterol	LMST01040217	Sterol lipids	Sterols	Stigmasterols and C24-ethyl derivatives	Sterols			45.3	31.2	M+NH4, M+Na	C53H92O7	0.0220362	2.09399e+06	2.11474e+06	2.02857e+06	2.19088e+06	1.90707e+06	1.79184e+06	1.76356e+06	1.79529e+06	2.48884e+06	2.11033e+06	2.18152e+06	2.39475e+06
11.17_838.6689n	856.703	11.1685	pos	18:2-Glc-Sitosterol	LMST01040218	Sterol lipids	Sterols	Stigmasterols and C24-ethyl derivatives	Sterols			48.3	45.3	M+NH4, M+Na	C53H90O7	0.255873	6.50592e+06	6.56182e+06	6.49907e+06	6.68896e+06	5.68507e+06	6.04367e+06	5.68507e+06	6.10808e+06	7.96234e+06	7.65629e+06	8.1716e+06	7.21928e+06
10.90_854.6869m/z	854.687	10.9031	pos	18:3-Glc-Sitosterol	LMST01040219	Sterol lipids	Sterols	Stigmasterols and C24-ethyl derivatives	Sterols			51.7	59.8	M+NH4	C53H88O7	0.102969	3.42294e+07	3.51867e+07	3.47648e+07	3.64038e+07	2.41872e+07	2.34857e+07	2.60208e+07	2.77623e+07	3.82472e+07	3.89371e+07	4.08138e+07	3.86884e+07
10.62_834.6372n	852.671	10.6168	pos	18:3-Glc-Stigmasterol	LMST01040230	Sterol lipids	Sterols	Stigmasterols and C24-ethyl derivatives	Sterols			47.7	44	M+NH4, M+Na	C53H86O7	-0.161195	4.28784e+06	4.30347e+06	4.47072e+06	4.41357e+06	3.16481e+06	2.71106e+06	2.46272e+06	3.44489e+06	4.68659e+06	4.82948e+06	5.10725e+06	4.53258e+06
