# Supplementary material for: Overexpression of Umellularia californica FatB thioesterase affects plant growth and lipid metabolome leading to improved drought tolerance in Arabidopsis and tomato
Source: Front Plant Sci. 2025 Jan 10;15:1446210. doi: 10.3389/fpls.2024.1446210 (PMC11757637; doi:10.3389/fpls.2024.1446210)
Supplement: Supplementary Table 2 — Metabolites information of heatmap in Figure 3C . [file Table2.xlsx]

## Sheet: Sheet1
	AWUWU			WEGROUP
	眼线笔			洗发水
	眉笔			蓝莓汁
	睫毛膏			番茄肉酱面
	四代耳机
				5月	6月	7月	8月	9月	10月	11月	12月	1月	2月	3月	4月	5月
项目	农委项目	园艺
		黄瓜
	面上项目	CLE
		ABCG26
文章	复旦	CLE19-BES1
		BAM3	补数据
			修改文章
			投稿
			补实验
	华师大	基因组	上传数据
			投回
		UcFATB	转投
			补数据
		IAA9
		ABCG26
		FATB2
		KAR
		SPL3
		ASHHs
		番茄小肽鉴定

## Sheet: Sheet2
	我	娃	妈妈	老江
5:30-6:00	洗漱、化妆
6:00-6:30	论文写作
6:30-7:00
7:00-7:30		起床，运动，洗漱
7:30-8:00	早饭，看书，带娃	喝牛奶吃早饭	打扫，准备早饭
8:00-8:30		看书，浇花，喂猫
8:30-9:00	工作	户外活动	陪玩
9:00-9:30
9:30-10:00
10:00-10:30
10:30-11:00		在家玩	做饭
11:00-11:30	陪娃玩
11:30-12:00	午饭	午饭	午饭
12:00-12:30	陪娃，给猫梳毛	自由活动	自由时间
12:30-13:00	哄睡	午睡
13:00-13:30	工作
13:30-14:00
14:00-14:30
14:30-15:00
15:00-15:30		下午茶
15:30-16:00		玩
16:00-16:30			户外
16:30-17:00
17:00-17:30			做饭
17:30-18:00		吃晚饭
18:00-18:30	扔垃圾，洗澡
18:30-19:00
19:00-19:30		画画
19:30-20:00		整理房间（归位）
20:00-20:30		洗澡、绘本、动画片
20:30-21:00
21:00-21:30		睡觉
21:30-22:00

## Sheet: UC16_col-0
Supplemental Figure S2. Metabolites information of heatmap in Fig 3c
Metabolites	Name in Heatmap	Common Class	VIP	P-value	adj.P-value	log2(FC)	FC(Fold change)	Average(UC16)	Average(Col-0)	UC16-1	UC16-2	UC16-3	UC16-4	Col-0-1	Col-0-2	Col-0-3	Col-0-4
16:0-Glc-Stigmasterol	16:0-Glc-Stigmasterol	Sterols	1.89851	0.000155906	0.00385698	0.672339	1.59366	2.0196e+06	1.26728e+06	2.087e+06	1.8958e+06	2.10985e+06	1.98574e+06	1.14675e+06	1.3543e+06	1.13465e+06	1.4334e+06
16:3-Glc-Sitosterol	16:3-Glc-Sitosterol	Sterols	2.13447	0.000472194	0.00571656	0.477257	1.39209	3.44275e+06	2.47307e+06	3.17935e+06	3.53689e+06	3.59646e+06	3.45831e+06	2.24388e+06	2.52845e+06	2.37708e+06	2.74288e+06
18:1-Glc-Sitosterol	18:1-Glc-Sitosterol	Sterols	1.46773	0.00224797	0.0130922	0.338255	1.26423	2.29386e+06	1.81444e+06	2.48884e+06	2.11033e+06	2.18152e+06	2.39475e+06	1.90707e+06	1.79184e+06	1.76356e+06	1.79529e+06
18:2-Glc-Sitosterol	18:2-Glc-Sitosterol	Sterols	2.9894	0.000213103	0.00408335	0.398706	1.31833	7.75237e+06	5.88047e+06	7.96234e+06	7.65629e+06	8.1716e+06	7.21928e+06	5.68507e+06	6.04367e+06	5.68507e+06	6.10808e+06
18:2-Glc-Stigmasterol	18:2-Glc-Stigmasterol	Sterols	3.19544	0.00102674	0.0077588	0.34582	1.27087	1.03913e+07	8.17653e+06	1.06749e+07	1.01411e+07	1.07498e+07	9.99952e+06	7.37675e+06	7.98996e+06	8.45919e+06	8.88021e+06
18:3-Glc-Campesterol	18:3-Glc-Campesterol	Sterols	2.5484	0.00052547	0.00604283	0.491527	1.40593	4.75472e+06	3.3819e+06	4.88898e+06	5.04605e+06	4.44859e+06	4.63524e+06	2.94893e+06	3.57624e+06	3.6341e+06	3.36831e+06
18:3-Glc-Sitosterol	18:3-Glc-Sitosterol	Sterols	8.21351	1.69797e-05	0.00229897	0.627025	1.54438	3.91716e+07	2.5364e+07	3.82472e+07	3.89371e+07	4.08138e+07	3.86884e+07	2.41872e+07	2.34857e+07	2.60208e+07	2.77623e+07
18:3-Glc-Stigmasterol	18:3-Glc-Stigmasterol	Sterols	2.94478	0.000336645	0.00491157	0.701022	1.62566	4.78897e+06	2.94587e+06	4.68659e+06	4.82948e+06	5.10725e+06	4.53258e+06	3.16481e+06	2.71106e+06	2.46272e+06	3.44489e+06
Cer(d14:1(4E)/26:0(2OH))	Cer(d14:1/26:0(2OH))	Cer	2.25756	0.000488417	0.00578978	0.809844	1.75302	2.5156e+06	1.43501e+06	2.58101e+06	2.86373e+06	2.35421e+06	2.26347e+06	1.65114e+06	1.48939e+06	1.30657e+06	1.29294e+06
Cer(d18:1(8Z)/16:0(2OH[R]))	Cer(d18:1/16:0(2OH[R]))	Cer	1.73157	0.00096149	0.00770546	0.778649	1.71552	1.56133e+06	910119	1.43678e+06	1.74663e+06	1.66922e+06	1.3927e+06	1.03359e+06	823360	773824	1.0097e+06
Cer(t18:1(8E)/26:0(2OH[R]))	Cer(t18:1/26:0(2OH[R]))	Cer	2.81106	0.000281675	0.00457923	0.569319	1.48382	5.1143e+06	3.44671e+06	4.91434e+06	5.30184e+06	5.10349e+06	5.13754e+06	4.06503e+06	3.26194e+06	3.21726e+06	3.2426e+06
DG(12:0/22:6(4Z,7Z,10Z,13Z,16Z,19Z)/0:0)	DG(12:0/22:6/0:0)	DG	1.53715	0.00026031	0.00448838	0.553074	1.46721	1.55943e+06	1.06285e+06	1.62928e+06	1.48353e+06	1.57482e+06	1.55009e+06	991421	972590	1.22512e+06	1.06229e+06
DG(14:0/20:2(11Z,14Z)/0:0)	DG(14:0/20:2/0:0)	DG	2.0161	0.00868897	0.0360878	0.427887	1.34526	3.72604e+06	2.76975e+06	3.5655e+06	4.09656e+06	3.76659e+06	3.47551e+06	2.15219e+06	3.02763e+06	3.01748e+06	2.88171e+06
DG(14:0/22:6(4Z,7Z,10Z,13Z,16Z,19Z)/0:0)	DG(14:0/22:6/0:0)	DG	1.28193	0.00479718	0.0231322	-0.395105	0.760434	1.20004e+06	1.57809e+06	1.32704e+06	1.20331e+06	1.13817e+06	1.13163e+06	1.67138e+06	1.47057e+06	1.73592e+06	1.4345e+06
DG(14:1(9Z)/20:3(8Z,11Z,14Z)/0:0)	DG(14:1/20:3/0:0)	DG	1.53902	0.00156526	0.0101208	0.981797	1.97492	1.05924e+06	536342	971749	972109	1.29294e+06	1.00014e+06	489582	512487	446640	696661
DG(14:1(9Z)/20:5(5Z,8Z,11Z,14Z,17Z)/0:0)	DG(14:1/20:5/0:0)	DG	1.00701	0.0011286	0.0189715	1.32411	2.50379	390008	159761	392109	455739	456222	295963	163478	112281	186727	176559
DG(16:1(9Z)/18:0/0:0)	DG(16:1/18:0/0:0)	DG	1.25402	0.00141237	0.00956712	-0.215632	0.861169	2.1205e+06	2.46235e+06	2.06368e+06	2.15601e+06	2.05755e+06	2.20473e+06	2.46034e+06	2.32412e+06	2.55012e+06	2.5148e+06
DG(16:1(9Z)/18:1(9Z)/0:0)	DG(16:1/18:1/0:0)	DG	1.54699	0.000686368	0.00659741	0.518461	1.43243	1.7006e+06	1.18722e+06	1.55376e+06	1.86901e+06	1.74093e+06	1.6387e+06	1.11744e+06	1.18427e+06	1.1389e+06	1.30827e+06
DG(16:1(9Z)/18:2(9Z,12Z)/0:0)	DG(16:1/18:2/0:0)	DG	2.43406	0.000594451	0.00618698	-0.336632	0.791888	4.81876e+06	6.08516e+06	4.91796e+06	4.81252e+06	4.52029e+06	5.0243e+06	6.16359e+06	5.81984e+06	6.50278e+06	5.85443e+06
DG(16:1(9Z)/18:3(9Z,12Z,15Z)/0:0)	DG(16:1/18:3/0:0)	DG	1.27416	0.000275319	0.00457923	0.597387	1.51297	1.01078e+06	668073	889136	1.01282e+06	1.05364e+06	1.08752e+06	692449	649842	641592	688411
DG(18:0/18:2(9Z,12Z)/0:0)	DG(18:0/18:2/0:0)	DG	2.18081	0.000546613	0.00604283	-0.109288	0.927045	1.29404e+07	1.39588e+07	1.29122e+07	1.31257e+07	1.2896e+07	1.28278e+07	1.35805e+07	1.39869e+07	1.42438e+07	1.40239e+07
DG(18:0/18:3(9Z,12Z,15Z)/0:0)	DG(18:0/18:3/0:0)	DG	1.96477	0.000852343	0.00741543	-0.112017	0.925294	1.02541e+07	1.1082e+07	1.02874e+07	1.03079e+07	1.01149e+07	1.03061e+07	1.08872e+07	1.08771e+07	1.11552e+07	1.14085e+07
DG(18:0/20:5(5Z,8Z,11Z,14Z,17Z)/0:0)	DG(18:0/20:5/0:0)	DG	1.81396	0.00221125	0.0130922	-0.213422	0.862489	4.56861e+06	5.29701e+06	4.74989e+06	4.5631e+06	4.56572e+06	4.39574e+06	5.03117e+06	5.19143e+06	5.35871e+06	5.60672e+06
DG(18:1(9Z)/18:1(9Z)/0:0)	DG(18:1/18:1/0:0)	DG	1.04529	0.00636615	0.0949732	-0.198688	0.871342	1.99255e+06	2.28676e+06	2.08837e+06	1.9986e+06	1.9159e+06	1.96732e+06	2.14722e+06	2.31043e+06	2.24632e+06	2.44306e+06
DG(18:1(9Z)/18:2(9Z,12Z)/0:0)	DG(18:1/18:2/0:0)	DG	1.39835	0.00126586	0.00884526	-0.208357	0.865523	2.74702e+06	3.17383e+06	2.84662e+06	2.82155e+06	2.61188e+06	2.70803e+06	3.04643e+06	3.13321e+06	3.24928e+06	3.26639e+06
DG(18:1(9Z)/18:3(9Z,12Z,15Z)/0:0)	DG(18:1/18:3/0:0)	DG	1.07635	0.000425436	0.00550166	0.720497	1.64775	619855	376183	621833	650132	611384	596071	294101	422250	436021	352360
DG(18:1(9Z)/20:4(5Z,8Z,11Z,14Z)/0:0)	DG(18:1/20:4/0:0)	DG	1.3515	0.0037653	0.0192549	-0.214453	0.861873	2.58009e+06	2.99359e+06	2.66859e+06	2.63855e+06	2.48622e+06	2.527e+06	2.855e+06	2.85958e+06	3.11318e+06	3.14659e+06
DG(18:2(9Z,12Z)/18:3(9Z,12Z,15Z)/0:0)	DG(18:2/18:3/0:0)	DG	1.09011	0.00231739	0.0133192	0.775076	1.71128	630837	368635	630757	751802	555544	585247	284081	399102	408704	382653
DG(18:2(9Z,12Z)/22:0/0:0)	DG(18:2/22:0/0:0)	DG	1.04841	0.0017961	0.0300463	-0.495109	0.709508	675853	931424	655320	665142	594810	728138	1.04319e+06	843130	891897	947476
DG(18:3(6Z,9Z,12Z)/16:1(9Z)/0:0)	DG(18:3/16:1/0:0)	DG	1.2506	0.00111755	0.0079486	-0.694173	0.618064	550436	890582	542458	543938	511731	603617	750638	866300	1.0095e+06	935887
DG(18:3(6Z,9Z,12Z)/18:1(9Z)/0:0)	DG(18:3/18:1/0:0)	DG	2.17432	0.00127471	0.00884526	-0.488382	0.712824	2.55335e+06	3.58203e+06	2.77543e+06	2.44752e+06	2.39942e+06	2.59105e+06	3.70229e+06	3.24249e+06	3.96837e+06	3.41495e+06
DG(18:3(6Z,9Z,12Z)/18:3(9Z,12Z,15Z)/0:0)	DG(18:3/18:3/0:0)	DG	1.52581	0.000207395	0.00408335	0.491416	1.40582	1.68584e+06	1.19918e+06	1.79685e+06	1.66101e+06	1.53521e+06	1.75028e+06	1.19384e+06	1.1619e+06	1.25659e+06	1.18439e+06
DG(18:4(6Z,9Z,12Z,15Z)/16:0/0:0)	DG(18:4/16:0/0:0)	DG	2.00633	0.00379007	0.0192549	0.702145	1.62692	2.37298e+06	1.45857e+06	2.20939e+06	2.18948e+06	2.81006e+06	2.283e+06	1.16685e+06	1.695e+06	1.28967e+06	1.68276e+06
DG(18:4(6Z,9Z,12Z,15Z)/16:1(9Z)/0:0)	DG(18:4/16:1/0:0)	DG	1.25769	0.000598039	0.00618698	-1.74925	0.297457	143299	481747	85965	119323	213749	154160	562519	516518	489292	358659
MG(18:1(9Z)/0:0/0:0)	MG(18:1/0:0/0:0)	MG	2.2199	0.000552245	0.00604283	-0.197298	0.872182	7.16753e+06	8.21792e+06	7.40543e+06	7.26251e+06	7.01906e+06	6.98312e+06	7.97332e+06	8.04595e+06	8.41451e+06	8.43792e+06
MGDG(18:3(9Z,12Z,15Z)/16:3(7Z,10Z,13Z))	MGDG(18:3/16:3)	MGDG	6.92958	0.0016952	0.0107175	0.776518	1.71299	2.52964e+07	1.47674e+07	2.95738e+07	2.45997e+07	2.23158e+07	2.4696e+07	1.39124e+07	1.29181e+07	1.83692e+07	1.38697e+07
MGDG(18:3(9Z,12Z,15Z)/18:3(9Z,12Z,15Z))	MGDG(18:3/18:3)	MGDG	4.08615	0.000889616	0.00744522	0.424276	1.3419	1.40952e+07	1.05039e+07	1.52356e+07	1.43559e+07	1.30959e+07	1.36935e+07	1.05915e+07	9.87538e+06	1.15131e+07	1.00357e+07
PC(14:0/20:1(11Z))	PC(14:0/20:1)	PC	2.01505	0.000155818	0.00385698	1.02531	2.03539	1.66825e+06	819620	1.59714e+06	1.77209e+06	1.865e+06	1.43877e+06	840446	757238	768658	912137
PC(14:0/20:3(8Z,11Z,14Z))	PC(14:0/20:3)	PC	3.5335	0.00149057	0.0098543	1.33005	2.51412	4.54434e+06	1.80753e+06	5.65832e+06	4.72744e+06	4.09549e+06	3.69612e+06	1.58657e+06	1.62689e+06	1.46285e+06	2.55381e+06
PC(14:1(9Z)/22:1(13Z))	PC(14:1/22:1)	PC	1.87088	0.000190879	0.00407297	1.40758	2.65293	1.17793e+06	444011	1.20445e+06	1.05429e+06	1.41508e+06	1.03788e+06	427944	432891	402357	512851
PC(14:1(9Z)/22:2(13Z,16Z))	PC(14:1/22:2)	PC	1.30689	6.79383e-05	0.00276121	1.49665	2.82188	546601	193701	612721	557255	559040	457390	190198	179060	165251	240297
PC(16:0/18:2(9Z,12Z))	PC(16:0/18:2)	PC	7.09753	8.2318e-05	0.00293014	1.29368	2.45152	1.76414e+07	7.19613e+06	1.9754e+07	1.65048e+07	1.87522e+07	1.55548e+07	6.97721e+06	6.39148e+06	6.64632e+06	8.76951e+06
PC(16:0/20:3(8Z,11Z,14Z))	PC(16:0/20:3)	PC	2.06346	0.000701128	0.00659741	1.58228	2.99444	1.37743e+06	459997	1.43313e+06	1.26887e+06	1.69764e+06	1.11009e+06	404714	334470	439471	661334
PC(16:0/20:5(5Z,8Z,11Z,14Z,17Z))	PC(16:0/20:5)	PC	3.07728	0.00302807	0.0164093	1.9119	3.76305	2.89325e+06	768857	3.94046e+06	3.2742e+06	2.27421e+06	2.08413e+06	817429	672898	609654	975445
PC(18:1(11Z)/18:3(6Z,9Z,12Z))	PC(18:1/18:3)	PC	3.86811	1.27408e-05	0.00229897	1.87195	3.66027	4.1968e+06	1.14658e+06	4.77339e+06	4.13837e+06	4.02159e+06	3.85385e+06	1.08538e+06	954137	1.04631e+06	1.50051e+06
PC(18:2(9Z,12Z)/18:4(6Z,9Z,12Z,15Z))	PC(18:2/18:4)	PC	2.0701	0.000331534	0.00491157	2.23392	4.7041	1.14912e+06	244280	1.45249e+06	1.16888e+06	937181	1.03792e+06	226494	188721	163751	398155
PE(16:0/18:2(9Z,12Z))	PE(16:0/18:2)	PE	1.62105	0.000137969	0.00385698	0.872823	1.83124	1.20661e+06	658902	1.2749e+06	1.09758e+06	1.11573e+06	1.33823e+06	618062	633452	658261	725833
PE(16:0/20:5(5Z,8Z,11Z,14Z,17Z))	PE(16:0/20:5)	PE	1.07871	0.00763767	0.0331743	-0.685474	0.621802	457443	735673	508494	482449	429706	409122	616855	812882	884161	628795
PE(18:3(9Z,12Z,15Z)/18:1(9Z))	PE(18:3/18:1)	PE	1.08214	0.000358049	0.0336018	-0.59464	0.662209	547333	826525	593253	536681	569657	489738	763348	842944	907156	792652
PG(16:1(9Z)/18:3(9Z,12Z,15Z))	PG(16:1/18:3)	PG	2.62181	0.00110543	0.0079486	0.813498	1.75747	3.47037e+06	1.97464e+06	3.18208e+06	3.12946e+06	4.1603e+06	3.40963e+06	1.73865e+06	2.06313e+06	1.92145e+06	2.17534e+06
PG(18:4(6Z,9Z,12Z,15Z)/14:0)	PG(18:4/14:0)	PG	1.13518	0.00271012	0.0151182	-1.52118	0.348402	152813	438611	90631.3	108466	256698	155456	414460	429788	347903	562293
PI(18:2(9Z,12Z)/22:1(11Z))	PI(18:2/22:1)	PI	6.37538	0.00175879	0.0109973	0.462815	1.37823	3.24801e+07	2.35665e+07	3.64001e+07	3.00483e+07	3.24932e+07	3.09785e+07	2.48803e+07	2.51807e+07	2.28974e+07	2.13078e+07
PI(18:4(6Z,9Z,12Z,15Z)/20:0)	PI(18:4/20:0)	PI	2.22268	0.00104159	0.0077588	0.861613	1.81707	2.39306e+06	1.31699e+06	2.80171e+06	2.29195e+06	2.24276e+06	2.23584e+06	1.53974e+06	1.07491e+06	1.14702e+06	1.5063e+06
TG(16:0/16:1(9Z)/20:5(5Z,8Z,11Z,14Z,17Z))	TG(16:0/16:1/20:5)	TG	1.74505	0.000318347	0.00491157	-0.518005	0.698337	1.49353e+06	2.1387e+06	1.56023e+06	1.55024e+06	1.56443e+06	1.29924e+06	2.176e+06	2.28251e+06	2.08616e+06	2.01013e+06
TG(16:0/18:2(9Z,12Z)/18:2(9Z,12Z))	TG(16:0/18:2/18:2)	TG	1.54442	0.000144188	0.00385698	-0.439951	0.73716	1.38374e+06	1.87712e+06	1.35584e+06	1.34883e+06	1.46274e+06	1.36755e+06	1.91803e+06	1.83089e+06	1.76144e+06	1.99813e+06
TG(16:0/18:2(9Z,12Z)/18:3(9Z,12Z,15Z))	TG(16:0/18:2/18:3)	TG	1.47616	0.0027521	0.0152033	-0.445795	0.73418	1.34571e+06	1.83294e+06	1.41069e+06	1.38118e+06	1.47125e+06	1.1197e+06	2.01231e+06	1.82044e+06	1.76949e+06	1.7295e+06
TG(16:1(9Z)/18:3(9Z,12Z,15Z)/20:5(5Z,8Z,11Z,14Z,17Z))	TG(16:1/18:3/20:5)	TG	2.34306	0.000133977	0.00385698	-1.13203	0.456273	959759	2.10347e+06	1.05398e+06	1.09675e+06	960743	727569	2.1705e+06	1.95303e+06	2.36765e+06	1.92271e+06
TG(18:0/18:2(9Z,12Z)/18:3(9Z,12Z,15Z))	TG(18:0/18:2/18:3)	TG	2.24296	0.000183726	0.00407297	-0.88852	0.540168	1.22981e+06	2.27672e+06	1.26494e+06	1.17663e+06	1.2822e+06	1.19547e+06	2.21064e+06	1.95826e+06	2.54105e+06	2.39692e+06
TG(18:1(9Z)/18:2(9Z,12Z)/18:3(9Z,12Z,15Z))	TG(18:1/18:2/18:3)	TG	2.52645	0.000134246	0.00385698	-0.893825	0.538185	1.55009e+06	2.88022e+06	1.56631e+06	1.52349e+06	1.75914e+06	1.35143e+06	3.07837e+06	3.12951e+06	2.64809e+06	2.66492e+06
TG(18:2(9Z,12Z)/18:2(9Z,12Z)/18:3(9Z,12Z,15Z))	TG(18:2/18:2/18:3)	TG	3.08845	0.000336524	0.00491157	-0.840715	0.558367	2.53884e+06	4.54691e+06	2.66918e+06	2.63609e+06	2.80263e+06	2.04748e+06	5.09024e+06	4.14492e+06	4.70354e+06	4.24895e+06
TG(18:2(9Z,12Z)/18:3(9Z,12Z,15Z)/18:3(9Z,12Z,15Z))	TG(18:2/18:3/18:3)	TG	2.96559	0.000397673	0.00538753	-0.973079	0.509418	1.92855e+06	3.7858e+06	2.08447e+06	2.11464e+06	2.00072e+06	1.51438e+06	4.31741e+06	3.33045e+06	3.96773e+06	3.5276e+06
TG(20:4(5Z,8Z,11Z,14Z)/22:6(4Z,7Z,10Z,13Z,16Z,19Z)/22:6(4Z,7Z,10Z,13Z,16Z,19Z))	TG(20:4/22:6/22:6)	TG	1.66531	9.43396e-05	0.0031576	0.698346	1.62264	1.50009e+06	924472	1.34527e+06	1.54468e+06	1.48008e+06	1.63032e+06	922921	885311	917134	972522
