# Supplementary material for: Overexpression of Umellularia californica FatB thioesterase affects plant growth and lipid metabolome leading to improved drought tolerance in Arabidopsis and tomato
Source: Front Plant Sci. 2025 Jan 10;15:1446210. doi: 10.3389/fpls.2024.1446210 (PMC11757637; doi:10.3389/fpls.2024.1446210)
Supplement: Supplementary Table 3 — Kyoto Encyclopedia of Genes and Genomes (KEGG) metabolic pathway enrichment. [file Table3.xlsx]

## Sheet: Sheet1
	AWUWU			WEGROUP
	眼线笔			洗发水
	眉笔			蓝莓汁
	睫毛膏			番茄肉酱面
	四代耳机
				5月	6月	7月	8月	9月	10月	11月	12月	1月	2月	3月	4月	5月
项目	农委项目	园艺
		黄瓜
	面上项目	CLE
		ABCG26
文章	复旦	CLE19-BES1
		BAM3	补数据
			修改文章
			投稿
			补实验
	华师大	基因组	上传数据
			投回
		UcFATB	转投
			补数据
		IAA9
		ABCG26
		FATB2
		KAR
		SPL3
		ASHHs
		番茄小肽鉴定

## Sheet: Sheet2
	我	娃	妈妈	老江
5:30-6:00	洗漱、化妆
6:00-6:30	论文写作
6:30-7:00
7:00-7:30		起床，运动，洗漱
7:30-8:00	早饭，看书，带娃	喝牛奶吃早饭	打扫，准备早饭
8:00-8:30		看书，浇花，喂猫
8:30-9:00	工作	户外活动	陪玩
9:00-9:30
9:30-10:00
10:00-10:30
10:30-11:00		在家玩	做饭
11:00-11:30	陪娃玩
11:30-12:00	午饭	午饭	午饭
12:00-12:30	陪娃，给猫梳毛	自由活动	自由时间
12:30-13:00	哄睡	午睡
13:00-13:30	工作
13:30-14:00
14:00-14:30
14:30-15:00
15:00-15:30		下午茶
15:30-16:00		玩
16:00-16:30			户外
16:30-17:00
17:00-17:30			做饭
17:30-18:00		吃晚饭
18:00-18:30	扔垃圾，洗澡
18:30-19:00
19:00-19:30		画画
19:30-20:00		整理房间（归位）
20:00-20:30		洗澡、绘本、动画片
20:30-21:00
21:00-21:30		睡觉
21:30-22:00

## Sheet: UC16_col-0 (2)
Supplemental Figure S3. Kyoto Encyclopedia of Genes and Genomes (KEGG) metabolic pathway enrichment
ID Annotation	Annotation	in set	set	in background	background	RichFactor	p-value	-lg(p-value)	FDR correction	Matching IDs	URL
ath00591	Linoleic acid metabolism	1	2	28	3703	0.0357143	0.0150677	1.82195	0.0348648	C00157	https://www.genome.jp/kegg-bin/show_pathway?ath00591/ath:C00157%09red
ath00561	Glycerolipid metabolism	1	2	38	3703	0.0263158	0.0204213	1.68992	0.0348648	C00422	https://www.genome.jp/kegg-bin/show_pathway?ath00561/ath:C00422%09blue
ath00592	alpha-Linolenic acid metabolism	1	2	44	3703	0.0227273	0.0236265	1.6266	0.0348648	C00157	https://www.genome.jp/kegg-bin/show_pathway?ath00592/ath:C00157%09red
ath00564	Glycerophospholipid metabolism	1	2	52	3703	0.0192308	0.0278919	1.55452	0.0348648	C00157	https://www.genome.jp/kegg-bin/show_pathway?ath00564/ath:C00157%09red
ath00590	Arachidonic acid metabolism	1	2	75	3703	0.0133333	0.0401028	1.39682	0.0401028	C00157	https://www.genome.jp/kegg-bin/show_pathway?ath00590/ath:C00157%09red
