# Supplementary material for: Overexpression of Umellularia californica FatB thioesterase affects plant growth and lipid metabolome leading to improved drought tolerance in Arabidopsis and tomato
Source: Front Plant Sci. 2025 Jan 10;15:1446210. doi: 10.3389/fpls.2024.1446210 (PMC11757637; doi:10.3389/fpls.2024.1446210)
Supplement: Supplementary Table 4 — Differential metabolite identification in UC16 transgenic and wild type plants. [file Table4.xlsx]

## Sheet: Sheet1
	AWUWU			WEGROUP
	眼线笔			洗发水
	眉笔			蓝莓汁
	睫毛膏			番茄肉酱面
	四代耳机
				5月	6月	7月	8月	9月	10月	11月	12月	1月	2月	3月	4月	5月
项目	农委项目	园艺
		黄瓜
	面上项目	CLE
		ABCG26
文章	复旦	CLE19-BES1
		BAM3	补数据
			修改文章
			投稿
			补实验
	华师大	基因组	上传数据
			投回
		UcFATB	转投
			补数据
		IAA9
		ABCG26
		FATB2
		KAR
		SPL3
		ASHHs
		番茄小肽鉴定

## Sheet: Sheet2
	我	娃	妈妈	老江
5:30-6:00	洗漱、化妆
6:00-6:30	论文写作
6:30-7:00
7:00-7:30		起床，运动，洗漱
7:30-8:00	早饭，看书，带娃	喝牛奶吃早饭	打扫，准备早饭
8:00-8:30		看书，浇花，喂猫
8:30-9:00	工作	户外活动	陪玩
9:00-9:30
9:30-10:00
10:00-10:30
10:30-11:00		在家玩	做饭
11:00-11:30	陪娃玩
11:30-12:00	午饭	午饭	午饭
12:00-12:30	陪娃，给猫梳毛	自由活动	自由时间
12:30-13:00	哄睡	午睡
13:00-13:30	工作
13:30-14:00
14:00-14:30
14:30-15:00
15:00-15:30		下午茶
15:30-16:00		玩
16:00-16:30			户外
16:30-17:00
17:00-17:30			做饭
17:30-18:00		吃晚饭
18:00-18:30	扔垃圾，洗澡
18:30-19:00
19:00-19:30		画画
19:30-20:00		整理房间（归位）
20:00-20:30		洗澡、绘本、动画片
20:30-21:00
21:00-21:30		睡觉
21:30-22:00

## Sheet: UC16_col-0
Supplemental Figure S4. Differential metabolite identification in UC16 transgenic and wild type plants.
Metabolites	log2(FC)	KEGG	RED/BLUE	ID Annotation	Annotation	ID	m/z	Retention time (min)	Ion mode	LM ID	Category (Super Class)	Main Class	Sub Class	Common Class	level	kegg	Score	Fragmentation Score	Adducts	Formula	Mass Error (ppm)	CmpdID	VIP	P-value	adj.P-value	FC	average(UC16)	average(col-0)	UC16-1	UC16-2	UC16-3	UC16-4	Col-0-1	Col-0-2	Col-0-3	Col-0-4
PC(14:0/20:1(11Z))	1.02531	C00157	red	ath00591|ath00592|ath00564|ath00590	Linoleic acid metabolism|alpha-Linolenic acid metabolism|Glycerophospholipid metabolism|Arachidonic acid metabolism	9.63_760.5850m/z	760.585	9.6263	pos	LMGP01011372	Glycerophospholipids	Glycerophosphocholines	Diacylglycerophosphocholines	PC	**	C00157	41.4	23.2	M+H	C42H82NO8P	-0.137571	GP0101	2.01505	0.000155818	0.00385698	2.03539	1.66825e+06	819620	1.59714e+06	1.77209e+06	1.865e+06	1.43877e+06	840446	757238	768658	912137
PC(14:0/20:3(8Z,11Z,14Z))	1.33005	C00157	red	ath00591|ath00592|ath00564|ath00590	Linoleic acid metabolism|alpha-Linolenic acid metabolism|Glycerophospholipid metabolism|Arachidonic acid metabolism	6.89_755.5466n	756.554	6.89418	pos	LMGP01011374	Glycerophospholipids	Glycerophosphocholines	Diacylglycerophosphocholines	PC	**	C00157	51	57.9	M+H, M+Na	C42H78NO8P	0.0753235	GP0101	3.5335	0.00149057	0.0098543	2.51412	4.54434e+06	1.80753e+06	5.65832e+06	4.72744e+06	4.09549e+06	3.69612e+06	1.58657e+06	1.62689e+06	1.46285e+06	2.55381e+06
PC(16:0/20:3(8Z,11Z,14Z))	1.58228	C00157	red	ath00591|ath00592|ath00564|ath00590	Linoleic acid metabolism|alpha-Linolenic acid metabolism|Glycerophospholipid metabolism|Arachidonic acid metabolism	8.13_783.5780n	784.585	8.12627	pos	LMGP01010627	Glycerophospholipids	Glycerophosphocholines	Diacylglycerophosphocholines	PC	**	C00157	42.4	18.4	M+H, M+Na	C44H82NO8P	0.23149	GP0101	2.06346	0.000701128	0.00659741	2.99444	1.37743e+06	459997	1.43313e+06	1.26887e+06	1.69764e+06	1.11009e+06	404714	334470	439471	661334
PC(16:0/20:5(5Z,8Z,11Z,14Z,17Z))	1.9119	C00157	red	ath00591|ath00592|ath00564|ath00590	Linoleic acid metabolism|alpha-Linolenic acid metabolism|Glycerophospholipid metabolism|Arachidonic acid metabolism	6.01_779.5464n	780.554	6.00995	pos	LMGP01010633	Glycerophospholipids	Glycerophosphocholines	Diacylglycerophosphocholines	PC	**	C00157	43.6	23.2	M+H, M+Na	C44H78NO8P	-0.14264	GP0101	3.07728	0.00302807	0.0164093	3.76305	2.89325e+06	768857	3.94046e+06	3.2742e+06	2.27421e+06	2.08413e+06	817429	672898	609654	975445
TG(16:0/18:2(9Z,12Z)/18:2(9Z,12Z))	-0.439951	C00422	blue	ath00561	Glycerolipid metabolism	12.38_854.7368n	872.771	12.3823	pos	LMGL03010141	Glycerolipids	Triradylglycerols	Triacylglycerols	TG			54	76.3	M+NH4, M+K	C55H98O6	0.562085	GL0301	1.54442	0.000144188	0.00385698	0.73716	1.38374e+06	1.87712e+06	1.35584e+06	1.34883e+06	1.46274e+06	1.36755e+06	1.91803e+06	1.83089e+06	1.76144e+06	1.99813e+06
DG(16:1(9Z)/18:1(9Z)/0:0)	0.518461	C00165	red			7.97_575.5037m/z	575.504	7.97443	pos	LMGL02010026	Glycerolipids	Diradylglycerols	Diacylglycerols	DG			47.3	44.5	M+H-H2O	C37H68O5	0.481867	GL0201	1.54699	0.000686368	0.00659741	1.43243	1.7006e+06	1.18722e+06	1.55376e+06	1.86901e+06	1.74093e+06	1.6387e+06	1.11744e+06	1.18427e+06	1.1389e+06	1.30827e+06
DG(16:1(9Z)/18:2(9Z,12Z)/0:0)	-0.336632	C00165	blue			9.88_590.4911n	613.48	9.88118	pos	LMGL02010031	Glycerolipids	Diradylglycerols	Diacylglycerols	DG			47	37.4	M+Na, M+K, M+NH4, M+H, M+H-H2O	C37H66O5	0.085449	GL0201	2.43406	0.000594451	0.00618698	0.791888	4.81876e+06	6.08516e+06	4.91796e+06	4.81252e+06	4.52029e+06	5.0243e+06	6.16359e+06	5.81984e+06	6.50278e+06	5.85443e+06
18:3-Glc-Sitosterol	0.627025					10.90_854.6869m/z	854.687	10.9031	pos	LMST01040219	Sterol lipids	Sterols	Stigmasterols and C24-ethyl derivatives	Sterols			51.7	59.8	M+NH4	C53H88O7	0.102969	ST0104	8.21351	1.69797e-05	0.00229897	1.54438	3.91716e+07	2.5364e+07	3.82472e+07	3.89371e+07	4.08138e+07	3.86884e+07	2.41872e+07	2.34857e+07	2.60208e+07	2.77623e+07
PC(16:0/18:2(9Z,12Z))	1.29368					8.00_757.5622n	758.57	7.99613	pos	LMGP01010594	Glycerophospholipids	Glycerophosphocholines	Diacylglycerophosphocholines	PC			53.4	68.7	M+H, M+Na	C42H80NO8P	0.100404	GP0101	7.09753	8.2318e-05	0.00293014	2.45152	1.76414e+07	7.19613e+06	1.9754e+07	1.65048e+07	1.87522e+07	1.55548e+07	6.97721e+06	6.39148e+06	6.64632e+06	8.76951e+06
MGDG(18:3(9Z,12Z,15Z)/16:3(7Z,10Z,13Z))	0.776518					5.17_746.4966n	769.486	5.1721	pos	LMGL05010019	Glycerolipids	Glycosyldiradylglycerols	Glycosyldiacylglycerols	MGDG			54.1	72.1	M+Na, M+K, M+NH4	C43H70O10	-0.338851	GL0501	6.92958	0.0016952	0.0107175	1.71299	2.52964e+07	1.47674e+07	2.95738e+07	2.45997e+07	2.23158e+07	2.4696e+07	1.39124e+07	1.29181e+07	1.83692e+07	1.38697e+07
PI(18:2(9Z,12Z)/22:1(11Z))	0.462815					4.73_916.6063n	939.596	4.73468	pos	LMGP06010331	Glycerophospholipids	Glycerophosphoinositols	Diacylglycerophosphoinositols	PI			44.5	32.7	M+Na, M+K, M+NH4	C49H89O13P	2.44686	GP0601	6.37538	0.00175879	0.0109973	1.37823	3.24801e+07	2.35665e+07	3.64001e+07	3.00483e+07	3.24932e+07	3.09785e+07	2.48803e+07	2.51807e+07	2.28974e+07	2.13078e+07
MGDG(18:3(9Z,12Z,15Z)/18:3(9Z,12Z,15Z))	0.424276					5.97_774.5281n	797.517	5.96612	pos	LMGL05010001	Glycerolipids	Glycosyldiradylglycerols	Glycosyldiacylglycerols	MGDG			53	66.7	M+Na, M+K, M+NH4	C45H74O10	-0.123347	GL0501	4.08615	0.000889616	0.00744522	1.3419	1.40952e+07	1.05039e+07	1.52356e+07	1.43559e+07	1.30959e+07	1.36935e+07	1.05915e+07	9.87538e+06	1.15131e+07	1.00357e+07
PC(18:1(11Z)/18:3(6Z,9Z,12Z))	1.87195					6.87_781.5623n	782.57	6.87235	pos	LMGP01012150	Glycerophospholipids	Glycerophosphocholines	Diacylglycerophosphocholines	PC			52.8	69.1	M+H, M+Na	C44H80NO8P	0.128641	GP0101	3.86811	1.27408e-05	0.00229897	3.66027	4.1968e+06	1.14658e+06	4.77339e+06	4.13837e+06	4.02159e+06	3.85385e+06	1.08538e+06	954137	1.04631e+06	1.50051e+06
Cer(d14:1(4E)/26:0(2OH))	0.809844					10.62_637.6005n	638.608	10.6168	pos	LMSP02010073	Sphingolipids	Ceramides	N-acylsphingosines (ceramides)	Cer			50.2	57.8	M+H, M+Na	C40H79NO4	-0.606652	SP0201	2.25756	0.000488417	0.00578978	1.75302	2.5156e+06	1.43501e+06	2.58101e+06	2.86373e+06	2.35421e+06	2.26347e+06	1.65114e+06	1.48939e+06	1.30657e+06	1.29294e+06
18:2-Glc-Stigmasterol	0.34582					10.90_836.6536n	859.642	10.9031	pos	LMST01010383	Sterol lipids	Sterols	Cholesterol and derivatives	Sterols			42	13.1	M+H-H2O, M+H, M+Na, M+K	C53H88O7	0.765095	ST0101	3.19544	0.00102674	0.0077588	1.27087	1.03913e+07	8.17653e+06	1.06749e+07	1.01411e+07	1.07498e+07	9.99952e+06	7.37675e+06	7.98996e+06	8.45919e+06	8.88021e+06
TG(18:2(9Z,12Z)/18:2(9Z,12Z)/18:3(9Z,12Z,15Z))	-0.840715					11.79_876.7207n	894.755	11.7908	pos	LMGL03010420	Glycerolipids	Triradylglycerols	Triacylglycerols	TG			55.6	81.6	M+Na, M+K, M+NH4	C57H96O6	0.0375908	GL0301	3.08845	0.000336524	0.00491157	0.558367	2.53884e+06	4.54691e+06	2.66918e+06	2.63609e+06	2.80263e+06	2.04748e+06	5.09024e+06	4.14492e+06	4.70354e+06	4.24895e+06
MG(18:1(9Z)/0:0/0:0)	-0.197298					15.95_357.2998m/z	357.3	15.9539	pos	LMGL01010005	Glycerolipids	Monoradylglycerols	Monoacylglycerols	MG			48.2	46.2	M+H	C21H40O4	-0.421985	GL0101	2.2199	0.000552245	0.00604283	0.872182	7.16753e+06	8.21792e+06	7.40543e+06	7.26251e+06	7.01906e+06	6.98312e+06	7.97332e+06	8.04595e+06	8.41451e+06	8.43792e+06
18:2-Glc-Sitosterol	0.398706					11.17_838.6689n	856.703	11.1685	pos	LMST01040218	Sterol lipids	Sterols	Stigmasterols and C24-ethyl derivatives	Sterols			48.3	45.3	M+NH4, M+Na	C53H90O7	0.255873	ST0104	2.9894	0.000213103	0.00408335	1.31833	7.75237e+06	5.88047e+06	7.96234e+06	7.65629e+06	8.1716e+06	7.21928e+06	5.68507e+06	6.04367e+06	5.68507e+06	6.10808e+06
TG(18:2(9Z,12Z)/18:3(9Z,12Z,15Z)/18:3(9Z,12Z,15Z))	-0.973079					11.54_874.7053n	892.739	11.537	pos	LMGL03010471	Glycerolipids	Triradylglycerols	Triacylglycerols	TG			56.3	86.6	M+NH4, M+Na, M+K	C57H94O6	0.316031	GL0301	2.96559	0.000397673	0.00538753	0.509418	1.92855e+06	3.7858e+06	2.08447e+06	2.11464e+06	2.00072e+06	1.51438e+06	4.31741e+06	3.33045e+06	3.96773e+06	3.5276e+06
18:3-Glc-Stigmasterol	0.701022					10.62_834.6372n	852.671	10.6168	pos	LMST01040230	Sterol lipids	Sterols	Stigmasterols and C24-ethyl derivatives	Sterols			47.7	44	M+NH4, M+Na	C53H86O7	-0.161195	ST0104	2.94478	0.000336645	0.00491157	1.62566	4.78897e+06	2.94587e+06	4.68659e+06	4.82948e+06	5.10725e+06	4.53258e+06	3.16481e+06	2.71106e+06	2.46272e+06	3.44489e+06
Cer(t18:1(8E)/26:0(2OH[R]))	0.569319					10.92_709.6584n	710.666	10.9215	pos	LMSP02030029	Sphingolipids	Ceramides	N-acyl-4-hydroxysphinganines (phytoceramides)	Cer			56.2	86.4	M+H-H2O, M+H	C44H87NO5	-0.00492298	SP0203	2.81106	0.000281675	0.00457923	1.48382	5.1143e+06	3.44671e+06	4.91434e+06	5.30184e+06	5.10349e+06	5.13754e+06	4.06503e+06	3.26194e+06	3.21726e+06	3.2426e+06
PG(16:1(9Z)/18:3(9Z,12Z,15Z))	0.813498					5.59_742.4785n	760.512	5.59423	pos	LMGP04010213	Glycerophospholipids	Glycerophosphoglycerols	Diacylglycerophosphoglycerols	PG			54.4	74.7	M+NH4, M+Na, M+H	C40H71O10P	-0.0263461	GP0401	2.62181	0.00110543	0.0079486	1.75747	3.47037e+06	1.97464e+06	3.18208e+06	3.12946e+06	4.1603e+06	3.40963e+06	1.73865e+06	2.06313e+06	1.92145e+06	2.17534e+06
18:3-Glc-Campesterol	0.491527					10.80_822.6375n	840.671	10.8004	pos	LMST01031136	Sterol lipids	Sterols	Ergosterols and C24-methyl derivatives	Sterols			44.8	29.9	M+NH4, M+Na	C52H86O7	0.178039	ST0103	2.5484	0.00052547	0.00604283	1.40593	4.75472e+06	3.3819e+06	4.88898e+06	5.04605e+06	4.44859e+06	4.63524e+06	2.94893e+06	3.57624e+06	3.6341e+06	3.36831e+06
TG(18:1(9Z)/18:2(9Z,12Z)/18:3(9Z,12Z,15Z))	-0.893825					12.09_878.7360n	896.77	12.0863	pos	LMGL03010373	Glycerolipids	Triradylglycerols	Triacylglycerols	TG			55.6	84.3	M+NH4, M+K, M+Na	C57H98O6	-0.423913	GL0301	2.52645	0.000134246	0.00385698	0.538185	1.55009e+06	2.88022e+06	1.56631e+06	1.52349e+06	1.75914e+06	1.35143e+06	3.07837e+06	3.12951e+06	2.64809e+06	2.66492e+06
DG(18:4(6Z,9Z,12Z,15Z)/16:0/0:0)	0.702145					5.59_588.4754n	571.472	5.59423	pos	LMGL02010498	Glycerolipids	Diradylglycerols	Diacylglycerols	DG			45.3	30.9	M+H-H2O, M+Na	C37H64O5	0.0921896	GL0201	2.00633	0.00379007	0.0192549	1.62692	2.37298e+06	1.45857e+06	2.20939e+06	2.18948e+06	2.81006e+06	2.283e+06	1.16685e+06	1.695e+06	1.28967e+06	1.68276e+06
TG(16:1(9Z)/18:3(9Z,12Z,15Z)/20:5(5Z,8Z,11Z,14Z,17Z))	-1.13203					11.27_872.6897n	890.724	11.2686	pos	LMGL03010559	Glycerolipids	Triradylglycerols	Triacylglycerols	TG			55	82.1	M+NH4, M+Na	C57H92O6	0.400359	GL0301	2.34306	0.000133977	0.00385698	0.456273	959759	2.10347e+06	1.05398e+06	1.09675e+06	960743	727569	2.1705e+06	1.95303e+06	2.36765e+06	1.92271e+06
16:0-Glc-Stigmasterol	0.672339					11.17_812.6534n	830.687	11.1685	pos	LMST01040210	Sterol lipids	Sterols	Stigmasterols and C24-ethyl derivatives	Sterols			43.5	24.6	M+NH4, M+Na	C51H88O7	0.426291	ST0104	1.89851	0.000155906	0.00385698	1.59366	2.0196e+06	1.26728e+06	2.087e+06	1.8958e+06	2.10985e+06	1.98574e+06	1.14675e+06	1.3543e+06	1.13465e+06	1.4334e+06
TG(18:0/18:2(9Z,12Z)/18:3(9Z,12Z,15Z))	-0.88852					12.38_880.7521n	898.786	12.3823	pos	LMGL03010329	Glycerolipids	Triradylglycerols	Triacylglycerols	TG			50.9	59.5	M+NH4, M+Na	C57H100O6	0.103747	GL0301	2.24296	0.000183726	0.00407297	0.540168	1.22981e+06	2.27672e+06	1.26494e+06	1.17663e+06	1.2822e+06	1.19547e+06	2.21064e+06	1.95826e+06	2.54105e+06	2.39692e+06
PI(18:4(6Z,9Z,12Z,15Z)/20:0)	0.861613					10.48_886.5609n	887.568	10.4772	pos	LMGP06010412	Glycerophospholipids	Glycerophosphoinositols	Diacylglycerophosphoinositols	PI			41.4	17.6	M+H, M+Na	C47H83O13P	4.29954	GP0601	2.22268	0.00104159	0.0077588	1.81707	2.39306e+06	1.31699e+06	2.80171e+06	2.29195e+06	2.24276e+06	2.23584e+06	1.53974e+06	1.07491e+06	1.14702e+06	1.5063e+06
TG(16:0/16:1(9Z)/20:5(5Z,8Z,11Z,14Z,17Z))	-0.518005					11.81_850.7051n	868.739	11.8112	pos	LMGL03010215	Glycerolipids	Triradylglycerols	Triacylglycerols	TG			50.1	59.3	M+NH4, M+Na	C55H94O6	0.079103	GL0301	1.74505	0.000318347	0.00491157	0.698337	1.49353e+06	2.1387e+06	1.56023e+06	1.55024e+06	1.56443e+06	1.29924e+06	2.176e+06	2.28251e+06	2.08616e+06	2.01013e+06
DG(18:0/18:2(9Z,12Z)/0:0)	-0.109288					10.25_638.5720m/z	638.572	10.2535	pos	LMGL02010050	Glycerolipids	Diradylglycerols	Diacylglycerols	DG			46.8	39.6	M+NH4	C39H72O5	0.279719	GL0201	2.18081	0.000546613	0.00604283	0.927045	1.29404e+07	1.39588e+07	1.29122e+07	1.31257e+07	1.2896e+07	1.28278e+07	1.35805e+07	1.39869e+07	1.42438e+07	1.40239e+07
DG(18:3(6Z,9Z,12Z)/18:1(9Z)/0:0)	-0.488382					9.86_616.5067n	634.54	9.86045	pos	LMGL02010480	Glycerolipids	Diradylglycerols	Diacylglycerols	DG			43.4	28.1	M+NH4, M+Na, M+H, M+H-H2O	C39H68O5	-0.0391191	GL0201	2.17432	0.00127471	0.00884526	0.712824	2.55335e+06	3.58203e+06	2.77543e+06	2.44752e+06	2.39942e+06	2.59105e+06	3.70229e+06	3.24249e+06	3.96837e+06	3.41495e+06
16:3-Glc-Sitosterol	0.477257					10.62_808.6216n	826.655	10.6168	pos	LMST01040216	Sterol lipids	Sterols	Stigmasterols and C24-ethyl derivatives	Sterols			50	57.4	M+NH4, M+Na	C51H84O7	-0.0881981	ST0104	2.13447	0.000472194	0.00571656	1.39209	3.44275e+06	2.47307e+06	3.17935e+06	3.53689e+06	3.59646e+06	3.45831e+06	2.24388e+06	2.52845e+06	2.37708e+06	2.74288e+06
PC(18:2(9Z,12Z)/18:4(6Z,9Z,12Z,15Z))	2.23392					5.33_777.5308n	778.538	5.32697	pos	LMGP01011627	Glycerophospholipids	Glycerophosphocholines	Diacylglycerophosphocholines	PC			43.5	21.6	M+H, M+Na	C44H76NO8P	-0.0748996	GP0101	2.0701	0.000331534	0.00491157	4.7041	1.14912e+06	244280	1.45249e+06	1.16888e+06	937181	1.03792e+06	226494	188721	163751	398155
DG(18:3(6Z,9Z,12Z)/16:1(9Z)/0:0)	-0.694173					9.14_588.4753n	611.464	9.1393	pos	LMGL02010475	Glycerolipids	Diradylglycerols	Diacylglycerols	DG			47.6	44.6	M+Na, M+K, M+NH4, M+H	C37H64O5	-0.188918	GL0201	1.2506	0.00111755	0.0079486	0.618064	550436	890582	542458	543938	511731	603617	750638	866300	1.0095e+06	935887
DG(14:0/20:2(11Z,14Z)/0:0)	0.427887					7.31_575.5034m/z	575.503	7.31388	pos	LMGL02010390	Glycerolipids	Diradylglycerols	Diacylglycerols	DG			41.1	10.4	M+H-H2O	C37H68O5	0.0373654	GL0201	2.0161	0.00868897	0.0360878	1.34526	3.72604e+06	2.76975e+06	3.5655e+06	4.09656e+06	3.76659e+06	3.47551e+06	2.15219e+06	3.02763e+06	3.01748e+06	2.88171e+06
DG(12:0/22:6(4Z,7Z,10Z,13Z,16Z,19Z)/0:0)	0.553074					10.41_584.4439n	585.451	10.4127	pos	LMGL02010353	Glycerolipids	Diradylglycerols	Diacylglycerols	DG			40.2	6.66	M+H-H2O, M+H	C37H60O5	-0.329707	GL0201	1.53715	0.00026031	0.00448838	1.46721	1.55943e+06	1.06285e+06	1.62928e+06	1.48353e+06	1.57482e+06	1.55009e+06	991421	972590	1.22512e+06	1.06229e+06
DG(18:3(6Z,9Z,12Z)/18:3(9Z,12Z,15Z)/0:0)	0.491416					5.35_612.4753n	613.483	5.34963	pos	LMGL02010482	Glycerolipids	Diradylglycerols	Diacylglycerols	DG			46.2	33	M+H, M+NH4, M+H-H2O	C39H64O5	-0.157287	GL0201	1.52581	0.000207395	0.00408335	1.40582	1.68584e+06	1.19918e+06	1.79685e+06	1.66101e+06	1.53521e+06	1.75028e+06	1.19384e+06	1.1619e+06	1.25659e+06	1.18439e+06
DG(18:0/18:3(9Z,12Z,15Z)/0:0)	-0.112017					10.46_618.5222n	636.556	10.4565	pos	LMGL02010057	Glycerolipids	Diradylglycerols	Diacylglycerols	DG			51.8	70.8	M+H, M+NH4	C39H70O5	-0.228531	GL0201	1.96477	0.000852343	0.00741543	0.925294	1.02541e+07	1.1082e+07	1.02874e+07	1.03079e+07	1.01149e+07	1.03061e+07	1.08872e+07	1.08771e+07	1.11552e+07	1.14085e+07
18:1-Glc-Sitosterol	0.338255					11.47_840.6843n	858.718	11.4733	pos	LMST01040217	Sterol lipids	Sterols	Stigmasterols and C24-ethyl derivatives	Sterols			45.3	31.2	M+NH4, M+Na	C53H92O7	0.0220362	ST0104	1.46773	0.00224797	0.0130922	1.26423	2.29386e+06	1.81444e+06	2.48884e+06	2.11033e+06	2.18152e+06	2.39475e+06	1.90707e+06	1.79184e+06	1.76356e+06	1.79529e+06
PC(14:1(9Z)/22:1(13Z))	1.40758					9.88_786.6007m/z	786.601	9.88118	pos	LMGP01012133	Glycerophospholipids	Glycerophosphocholines	Diacylglycerophosphocholines	PC			43.4	21.2	M+H	C44H84NO8P	0.00920953	GP0101	1.87088	0.000190879	0.00407297	2.65293	1.17793e+06	444011	1.20445e+06	1.05429e+06	1.41508e+06	1.03788e+06	427944	432891	402357	512851
DG(18:0/20:5(5Z,8Z,11Z,14Z,17Z)/0:0)	-0.213422					10.82_625.5167m/z	625.517	10.82	pos	LMGL02010122	Glycerolipids	Diradylglycerols	Diacylglycerols	DG			50.7	71.8	M+H-H2O	C41H70O5	-3.60055	GL0201	1.81396	0.00221125	0.0130922	0.862489	4.56861e+06	5.29701e+06	4.74989e+06	4.5631e+06	4.56572e+06	4.39574e+06	5.03117e+06	5.19143e+06	5.35871e+06	5.60672e+06
PC(14:1(9Z)/22:2(13Z,16Z))	1.49665					8.54_784.5852m/z	784.585	8.5442	pos	LMGP01011406	Glycerophospholipids	Glycerophosphocholines	Diacylglycerophosphocholines	PC			40.6	11.5	M+H	C44H82NO8P	0.172479	GP0101	1.30689	6.79383e-05	0.00276121	2.82188	546601	193701	612721	557255	559040	457390	190198	179060	165251	240297
Cer(d18:1(8Z)/16:0(2OH[R]))	0.778649					7.47_553.5071n	554.514	7.46807	pos	LMSP02010100	Sphingolipids	Ceramides	N-acylsphingosines (ceramides)	Cer			53.3	71.4	M+H, M+Na	C34H67NO4	0.220031	SP0201	1.73157	0.00096149	0.00770546	1.71552	1.56133e+06	910119	1.43678e+06	1.74663e+06	1.66922e+06	1.3927e+06	1.03359e+06	823360	773824	1.0097e+06
TG(20:4(5Z,8Z,11Z,14Z)/22:6(4Z,7Z,10Z,13Z,16Z,19Z)/22:6(4Z,7Z,10Z,13Z,16Z,19Z))	0.698346					11.00_998.7410n	1016.77	11.0049	pos	LMGL03012566	Glycerolipids	Triradylglycerols	Triacylglycerols	TG			36.9	4.45	M+NH4, M+Na	C67H98O6	4.68775	GL0301	1.66531	9.43396e-05	0.0031576	1.62264	1.50009e+06	924472	1.34527e+06	1.54468e+06	1.48008e+06	1.63032e+06	922921	885311	917134	972522
PE(16:0/18:2(9Z,12Z))	0.872823					8.46_715.5153n	716.523	8.45678	pos	LMGP02010042	Glycerophospholipids	Glycerophosphoethanolamines	Diacylglycerophosphoethanolamines	PE			54.6	79.4	M+H, M+Na	C39H74NO8P	0.200252	GP0201	1.62105	0.000137969	0.00385698	1.83124	1.20661e+06	658902	1.2749e+06	1.09758e+06	1.11573e+06	1.33823e+06	618062	633452	658261	725833
DG(16:1(9Z)/18:0/0:0)	-0.215632					10.54_594.5225n	617.513	10.5377	pos	LMGL02010023	Glycerolipids	Diradylglycerols	Diacylglycerols	DG			51	66.3	M+NH4, M+Na, M+H-H2O	C37H70O5	0.297377	GL0201	1.25402	0.00141237	0.00956712	0.861169	2.1205e+06	2.46235e+06	2.06368e+06	2.15601e+06	2.05755e+06	2.20473e+06	2.46034e+06	2.32412e+06	2.55012e+06	2.5148e+06
TG(16:0/18:2(9Z,12Z)/18:3(9Z,12Z,15Z))	-0.445795					12.09_852.7203n	870.754	12.0863	pos	LMGL03010167	Glycerolipids	Triradylglycerols	Triacylglycerols	TG			57.2	90.5	M+NH4, M+K	C55H96O6	-0.399856	GL0301	1.47616	0.0027521	0.0152033	0.73418	1.34571e+06	1.83294e+06	1.41069e+06	1.38118e+06	1.47125e+06	1.1197e+06	2.01231e+06	1.82044e+06	1.76949e+06	1.7295e+06
DG(14:1(9Z)/20:3(8Z,11Z,14Z)/0:0)	0.981797					10.37_571.4719m/z	571.472	10.3735	pos	LMGL02010415	Glycerolipids	Diradylglycerols	Diacylglycerols	DG			41.3	12.6	M+H-H2O	C37H64O5	-0.366715	GL0201	1.53902	0.00156526	0.0101208	1.97492	1.05924e+06	536342	971749	972109	1.29294e+06	1.00014e+06	489582	512487	446640	696661
DG(18:2(9Z,12Z)/18:3(9Z,12Z,15Z)/0:0)	0.775076					5.62_597.4880m/z	597.488	5.61687	pos	LMGL02010071	Glycerolipids	Diradylglycerols	Diacylglycerols	DG			49.4	54	M+H-H2O	C39H66O5	0.417407	GL0201	1.09011	0.00231739	0.0133192	1.71128	630837	368635	630757	751802	555544	585247	284081	399102	408704	382653
PE(18:3(9Z,12Z,15Z)/18:1(9Z))	-0.59464					5.06_739.5155n	740.523	5.0634	pos	LMGP02011190	Glycerophospholipids	Glycerophosphoethanolamines	Diacylglycerophosphoethanolamines	PE			39.5	3.05	M+H, M+NH4, M+Na	C41H74NO8P	0.417425	GP0201	1.08214	0.00779514	0.0336018	0.662209	547333	826525	593253	536681	569657	489738	763348	842944	1.00716e+06	692652
DG(14:1(9Z)/20:5(5Z,8Z,11Z,14Z,17Z)/0:0)	1.28759					6.16_584.4446n	607.434	6.16475	pos	LMGL02010417	Glycerolipids	Diradylglycerols	Diacylglycerols	DG			41.4	17.4	M+Na, M+K, M+NH4, M+H	C37H60O5	0.814913	GL0201	1.00701	0.00365962	0.0189715	2.44119	390008	159761	392109	455739	456222	255963	163478	112281	186727	176559
DG(18:1(9Z)/18:3(9Z,12Z,15Z)/0:0)	0.720497					6.34_599.5037m/z	599.504	6.34228	pos	LMGL02010064	Glycerolipids	Diradylglycerols	Diacylglycerols	DG			49.1	57.1	M+H-H2O	C39H68O5	0.570454	GL0201	1.07635	0.000425436	0.00550166	1.64775	619855	376183	621833	650132	611384	596071	294101	422250	436021	352360
DG(18:1(9Z)/18:2(9Z,12Z)/0:0)	-0.208357					10.25_641.5114m/z	641.511	10.2535	pos	LMGL02010056	Glycerolipids	Diradylglycerols	Diacylglycerols	DG			44.9	34.9	M+Na	C39H70O5	-0.237455	GL0201	1.39835	0.00126586	0.00884526	0.865523	2.74702e+06	3.17383e+06	2.84662e+06	2.82155e+06	2.61188e+06	2.70803e+06	3.04643e+06	3.13321e+06	3.24928e+06	3.26639e+06
DG(18:1(9Z)/20:4(5Z,8Z,11Z,14Z)/0:0)	-0.214453					10.56_642.5200n	643.527	10.5593	pos	LMGL02010121	Glycerolipids	Diradylglycerols	Diacylglycerols	DG			41.4	19.5	M+H, M+K	C41H70O5	-3.57088	GL0201	1.3515	0.0037653	0.0192549	0.861873	2.58009e+06	2.99359e+06	2.66859e+06	2.63855e+06	2.48622e+06	2.527e+06	2.855e+06	2.85958e+06	3.11318e+06	3.14659e+06
DG(18:1(9Z)/18:1(9Z)/0:0)	-0.198688					10.78_643.5274m/z	643.527	10.7812	pos	LMGL02010049	Glycerolipids	Diradylglycerols	Diacylglycerols	DG			46.7	38.7	M+Na	C39H72O5	0.322667	GL0201	1.04529	0.0349104	0.0949732	0.871342	1.99255e+06	2.28676e+06	2.08837e+06	1.9986e+06	1.9159e+06	1.96732e+06	2.04722e+06	2.31043e+06	2.24632e+06	2.54306e+06
DG(14:0/22:6(4Z,7Z,10Z,13Z,16Z,19Z)/0:0)	-0.395105					7.29_612.4754n	630.509	7.29102	pos	LMGL02010401	Glycerolipids	Diradylglycerols	Diacylglycerols	DG			41.5	11.4	M+H, M+NH4	C39H64O5	0.0821234	GL0201	1.28193	0.00479718	0.0231322	0.760434	1.20004e+06	1.57809e+06	1.32704e+06	1.20331e+06	1.13817e+06	1.13163e+06	1.67138e+06	1.47057e+06	1.73592e+06	1.4345e+06
DG(16:1(9Z)/18:3(9Z,12Z,15Z)/0:0)	0.597387					5.94_571.4722m/z	571.472	5.94473	pos	LMGL02010035	Glycerolipids	Diradylglycerols	Diacylglycerols	DG			51	64.6	M+H-H2O	C37H64O5	0.133154	GL0201	1.27416	0.000275319	0.00457923	1.51297	1.01078e+06	668073	889136	1.01282e+06	1.05364e+06	1.08752e+06	692449	649842	641592	688411
DG(18:4(6Z,9Z,12Z,15Z)/16:1(9Z)/0:0)	-1.74925					8.24_609.4517m/z	609.452	8.23652	pos	LMGL02010499	Glycerolipids	Diradylglycerols	Diacylglycerols	DG			49.7	59.6	M+Na	C37H62O5	4.62623	GL0201	1.25769	0.000598039	0.00618698	0.297457	143299	481747	85965	119323	213749	154160	562519	516518	489292	358659
PE(16:0/20:5(5Z,8Z,11Z,14Z,17Z))	-0.685474					4.60_737.5001n	738.507	4.60282	pos	LMGP02011221	Glycerophospholipids	Glycerophosphoethanolamines	Diacylglycerophosphoethanolamines	PE			39.6	2.28	M+H, M+Na, M+H-H2O	C41H72NO8P	0.762838	GP0201	1.07871	0.00763767	0.0331743	0.621802	457443	735673	508494	482449	429706	409122	616855	812882	884161	628795
PG(18:4(6Z,9Z,12Z,15Z)/14:0)	-1.52118					3.94_697.4442m/z	697.444	3.94317	pos	LMGP04010427	Glycerophospholipids	Glycerophosphoglycerols	Diacylglycerophosphoglycerols	PG			41.3	10.7	M+H-H2O	C38H67O10P	0.385848	GP0401	1.13518	0.00271012	0.0151182	0.348402	152813	438611	90631.3	108466	256698	155456	414460	429788	347903	562293
DG(18:2(9Z,12Z)/22:0/0:0)	-0.462729					10.64_694.6335m/z	694.634	10.6378	pos	LMGL02010168	Glycerolipids	Diradylglycerols	Diacylglycerols	DG			47.8	53.6	M+NH4	C43H80O5	-1.29395	GL0201	1.04841	0.0067591	0.0300463	0.725612	675853	931424	655320	765142	554810	728138	1.04319e+06	843130	891897	947476
