# Supplementary material for: Overexpression of Umellularia californica FatB thioesterase affects plant growth and lipid metabolome leading to improved drought tolerance in Arabidopsis and tomato
Source: Front Plant Sci. 2025 Jan 10;15:1446210. doi: 10.3389/fpls.2024.1446210 (PMC11757637; doi:10.3389/fpls.2024.1446210)
Supplement: Supplementary Table 5 — The 3196 genes that showed significantly differentially changed mRNA expression levels in UC16. [file Table5.xls]

## Sheet: Table S5
Supplemental Table S5. The 3196 genes that showed significantly differentially changed mRNA expression levels in UC16.
gene_id	BaseMean_DESeq2	BaseMean_control_Col	BaseMean_case_UC16	FoldChange	log2FoldChange	p-value	q-value	Regulation	Expression_UC16_1	Expression_UC16_2	Expression_UC16_3	Expression_colo_4	Expression_Col_01	Expression_Col_02	gene_symbol	gene_Dbxref	description	product	TF_Family	GO_id	GO_term	pathway	pathway_description
AT1G01030	21.2424	36.0317	6.45309	0.180029	-2.4737	0.0001427	0.000512323	Down	0.106946	0.0371492	0.084771	0.456566	0.578681	0.289691	NGA3	Araport:AT1G01030,TAIR:AT1G01030,GeneID:839321		AP2/B3-like transcriptional factor family protein	B3	GO:0003677,GO:0003700,GO:0005634,GO:0006355,GO:0009908,GO:0048366,GO:1901371	DNA binding|DNA-binding transcription factor activity|nucleus|regulation of transcription, DNA-templated|flower development|leaf development|regulation of leaf morphogenesis
AT1G01130	59.7476	33.7838	85.7115	2.53696	1.3431	0.000602891	0.00193506	Up	3.25973	4.78085	7.38234	1.84359	2.10892	2.41347	F6F3.33	Araport:AT1G01130,TAIR:AT1G01130,GeneID:839359		CBL-interacting Serine/Threonine-kinase		GO:0004674,GO:0005524,GO:0005634,GO:0005737,GO:0007165,GO:0009409,GO:0009611,GO:0009651,GO:0010555,GO:0043266,GO:0051365,GO:0055075	protein serine/threonine kinase activity|ATP binding|nucleus|cytoplasm|signal transduction|response to cold|response to wounding|response to salt stress|response to mannitol|regulation of potassium ion transport|cellular response to potassium ion starvation|potassium ion homeostasis
AT1G01140	5987.73	8627.99	3347.47	0.388017	-1.36581	6.22e-49	2.02e-47	Down	42.1029	37.3038	42.361	114.403	110.27	103.414	CIPK9	Araport:AT1G01140,TAIR:AT1G01140,GeneID:839349	Encodes a CBL-interacting protein kinase with similarity to SOS2	CBL-interacting protein kinase 9		GO:0004674,GO:0005524,GO:0005634,GO:0005737,GO:0007165,GO:0009409,GO:0009611,GO:0009651,GO:0010555,GO:0043266,GO:0051365,GO:0055075	protein serine/threonine kinase activity|ATP binding|nucleus|cytoplasm|signal transduction|response to cold|response to wounding|response to salt stress|response to mannitol|regulation of potassium ion transport|cellular response to potassium ion starvation|potassium ion homeostasis
AT1G01180	501.531	320.749	682.314	2.12659	1.08854	4.33e-09	2.77e-08	Up	10.1058	12.5563	8.96808	6.64757	4.60865	4.32089	F6F3.5	Araport:AT1G01180,TAIR:AT1G01180,GeneID:839239		S-adenosyl-L-methionine-dependent methyltransferases superfamily protein
AT1G01250	159.77	242.891	76.6492	0.315268	-1.66535	5.98e-10	4.12e-09	Down	1.54978	1.64148	2.6151	7.85934	4.73382	6.76354	F6F3.6	Araport:AT1G01250,TAIR:AT1G01250,GeneID:839322	encodes a member of the DREB subfamily A-4 of ERF/AP2 transcription factor family. The protein contains one AP2 domain. There are 17 members in this subfamily including TINY.	Integrase-type DNA-binding superfamily protein	ERF	GO:0003677,GO:0003700,GO:0005634,GO:0009873	DNA binding|DNA-binding transcription factor activity|nucleus|ethylene-activated signaling pathway
AT1G01260	864.541	1198.18	530.905	0.44316	-1.1741	4.22e-24	6.52e-23	Down	4.45507	4.46269	4.09628	10.7216	10.0942	9.90704	F6F3.7	Araport:AT1G01260,TAIR:AT1G01260,GeneID:839545		basic helix-loop-helix (bHLH) DNA-binding superfamily protein	bHLH	GO:0003700,GO:0005634,GO:0005737,GO:0006355,GO:0010629,GO:0044212,GO:0046983	DNA-binding transcription factor activity|nucleus|cytoplasm|regulation of transcription, DNA-templated|negative regulation of gene expression|transcription regulatory region DNA binding|protein dimerization activity
AT1G01300	3265.75	4363.25	2168.25	0.496873	-1.00905	4.5e-32	9.31e-31	Down	23.0542	23.8185	24.1103	50.5732	45.6287	53.516	F6F3.10	Araport:AT1G01300,TAIR:AT1G01300,GeneID:839375		Eukaryotic aspartyl protease family protein		GO:0004190,GO:0006508,GO:0009505,GO:0016020,GO:0030163,GO:0080167	aspartic-type endopeptidase activity|proteolysis|plant-type cell wall|membrane|protein catabolic process|response to karrikin
AT1G01430	2141.07	1346.81	2935.33	2.18053	1.12468	1.41e-28	2.6e-27	Up	30.5398	29.6695	32.648	14.2337	15.6772	14.5956	TBL25	Araport:AT1G01430,TAIR:AT1G01430,GeneID:837247	Encodes a member of the TBL (TRICHOME BIREFRINGENCE-LIKE) gene family containing a plant-specific DUF231 (domain of unknown function) domain. TBL gene family has 46 members, two of which (TBR/AT5G06700 and TBL3/AT5G01360) have been shown to be involved in the synthesis and deposition of secondary wall cellulose, presumably by influencing the esterification state of pectic polymers. A nomenclature…	TRICHOME BIREFRINGENCE-LIKE 25		GO:0005794,GO:0016021,GO:0016413	Golgi apparatus|integral component of membrane|O-acetyltransferase activity
AT1G01440	1396.54	917.708	1875.37	2.04313	1.03078	2.66e-25	4.32e-24	Up	15.5819	14.6706	14.4859	7.72279	7.0794	8.13555	F6F3.24	Araport:AT1G01440,TAIR:AT1G01440,GeneID:837155		hypothetical protein (DUF3133)		GO:0001664,GO:0003924,GO:0005525,GO:0005634,GO:0005834,GO:0007188,GO:0031683,GO:0046872	G protein-coupled receptor binding|GTPase activity|GTP binding|nucleus|heterotrimeric G-protein complex|adenylate cyclase-modulating G protein-coupled receptor signaling pathway|G-protein beta/gamma-subunit complex binding|metal ion binding
AT1G01470	20384.9	31520.2	9249.51	0.293458	-1.76878	4.75e-66	2.31e-64	Down	166.604	133.663	163.029	586.937	553.896	509.333	LEA14	Araport:AT1G01470,TAIR:AT1G01470,GeneID:837071	Encodes late-embryogenesis abundant protein whose mRNA levels are induced in response to wounding and light stress. Might be involved in protection against dessication.	Late embryogenesis abundant protein		GO:0005829,GO:0009269,GO:0009611,GO:0009644,GO:0050832	cytosol|response to desiccation|response to wounding|response to high light intensity|defense response to fungus
AT1G01480	21.0456	40.4039	1.6873	0.0421301	-4.569	1.09e-07	6.05e-07	Down	0.0437853	0.011407	0	0.549989	0.336066	0.501691	ACS2	Araport:AT1G01480,TAIR:AT1G01480,GeneID:837082	a member of the 1-aminocyclopropane-1-carboxylate (ACC) synthase (S-adenosyl-L-methionine methylthioadenosine-lyase, EC 4.4.1.14) gene family, isolated from a flower-specific cDNA library.	1-amino-cyclopropane-1-carboxylate synthase 2		GO:0009693,GO:0009835,GO:0016847,GO:0030170	ethylene biosynthetic process|fruit ripening|1-aminocyclopropane-1-carboxylate synthase activity|pyridoxal phosphate binding	path:ath00270,path:ath04016	Cysteine and methionine metabolism|MAPK signaling pathway - plant
AT1G01490	2544.31	1359.94	3728.69	2.74112	1.45477	1.81e-35	4.22e-34	Up	37.0745	37.2336	38.1131	12.4705	13.0582	17.4801	F22L4.5	Araport:AT1G01490,TAIR:AT1G01490,GeneID:839440		Heavy metal transport/detoxification superfamily protein		GO:0030001,GO:0046872	metal ion transport|metal ion binding
AT1G01540	5742.04	2613.64	8870.43	3.3948	1.76333	4.62e-90	3.38e-88	Up	86.7261	90.9798	91.1709	26.5776	28.7214	27.4964	F22L4.8	Araport:AT1G01540,TAIR:AT1G01540,GeneID:839533		Protein kinase superfamily protein
AT1G01560	1578.47	2649.45	507.492	0.191507	-2.38453	5.86e-61	2.53e-59	Down	5.86749	7.76112	4.90608	32.5472	35.2212	33.3625	MPK11	Araport:AT1G01560,TAIR:AT1G01560,GeneID:839523	member of MAP Kinase	MAP kinase 11		GO:0004707,GO:0005524,GO:0005634,GO:0005737,GO:0005829,GO:0009737,GO:0010468,GO:0035556	MAP kinase activity|ATP binding|nucleus|cytoplasm|cytosol|response to abscisic acid|regulation of gene expression|intracellular signal transduction
AT1G01620	9351.88	1831.31	16872.5	9.21337	3.20373	9.27e-294	7.82e-291	Up	228.372	249.192	257.685	29.8313	26.4713	27.2474	PIP1C	Araport:AT1G01620,TAIR:AT1G01620,GeneID:839235	a member of the plasma membrane intrinsic protein subfamily PIP1. localizes to the plasma membrane and exhibits water transport activity in Xenopus oocyte. expressed ubiquitously and protein level decreases slightly during leaf development.	plasma membrane intrinsic protein 1C		GO:0005773,GO:0005886,GO:0006833,GO:0009414,GO:0009506,GO:0009507,GO:0015250,GO:0016020,GO:0016021	vacuole|plasma membrane|water transport|response to water deprivation|plasmodesma|chloroplast|water channel activity|membrane|integral component of membrane
AT1G01680	168.397	320.423	16.3711	0.0511849	-4.28814	1.37e-44	4.04e-43	Down	0.457699	0.337848	0.136048	6.57585	6.01648	6.49029	PUB54	Araport:AT1G01680,TAIR:AT1G01680,GeneID:839251		plant U-box 54		GO:0004842,GO:0005634,GO:0005737	ubiquitin-protein transferase activity|nucleus|cytoplasm
AT1G01720	831.059	1272.2	389.924	0.306424	-1.7064	2.34e-37	5.81e-36	Down	4.94371	6.06511	4.91263	16.5946	18.0498	19.7241	ATAF1	Araport:AT1G01720,TAIR:AT1G01720,GeneID:839265	Belongs to a large family of putative transcriptional activators with NAC domain. Transcript level increases in response to wounding and abscisic acid. ATAF1 attentuates ABA signaling and sythesis. Mutants are hyposensitive to ABA.	NAC (No Apical Meristem) domain transcriptional regulator superfamily protein	NAC	GO:0003677,GO:0003700,GO:0005634,GO:0009611,GO:0009788,GO:0019900	DNA binding|DNA-binding transcription factor activity|nucleus|response to wounding|negative regulation of abscisic acid-activated signaling pathway|kinase binding
AT1G02220	43.3292	62.9206	23.7377	0.378263	-1.40254	0.00246934	0.00695674	Down	0.569484	0.192872	0.246659	0.785462	0.9797	1.02736	NAC003	Araport:AT1G02220,TAIR:AT1G02220,GeneID:839476		NAC domain containing protein 3	NAC	GO:0003700,GO:0005634,GO:0044212	DNA-binding transcription factor activity|nucleus|transcription regulatory region DNA binding
AT1G02270	3187.14	4814.28	1559.99	0.324086	-1.62555	1.23e-61	5.37e-60	Down	20.1355	18.7505	18.7285	56.803	64.3304	64.7138	T6A9.35	Araport:AT1G02270,TAIR:AT1G02270,GeneID:839381		Calcium-binding endonuclease/exonuclease/phosphatase family		GO:0005509,GO:0005634,GO:0009409,GO:0016021	calcium ion binding|nucleus|response to cold|integral component of membrane
AT1G02310	9.43309	17.8402	1.02598	0.0576723	-4.11598	0.000663154	0.00211208	Down	0	0	0.0453833	0.233983	0.408583	0.1737	MAN1	Araport:AT1G02310,TAIR:AT1G02310,GeneID:839444		Glycosyl hydrolase superfamily protein		GO:0005576,GO:0016985,GO:0046355	extracellular region|mannan endo-1,4-beta-mannosidase activity|mannan catabolic process	path:ath00051	Fructose and mannose metabolism
AT1G02380	267.624	38.214	497.034	12.9401	3.69378	2.8e-59	1.16e-57	Up	7.42535	8.20356	9.84453	0.829745	0.509506	0.720729	T6A9.7	Araport:AT1G02380,TAIR:AT1G02380,GeneID:837745		transmembrane protein
AT1G02390	416.231	576.695	255.767	0.443939	-1.17157	6.32e-11	4.73e-10	Down	3.00153	2.85488	2.46938	5.78506	7.81114	5.94966	GPAT2	Araport:AT1G02390,TAIR:AT1G02390,GeneID:839558	putative sn-glycerol-3-phosphate 2-O-acyltransferase	glycerol-3-phosphate acyltransferase 2		GO:0004366,GO:0010143,GO:0016020,GO:0016021,GO:0016024,GO:0016791,GO:0090447,GO:0102420	glycerol-3-phosphate O-acyltransferase activity|cutin biosynthetic process|membrane|integral component of membrane|CDP-diacylglycerol biosynthetic process|phosphatase activity|glycerol-3-phosphate 2-O-acyltransferase activity|sn-1-glycerol-3-phosphate C16:0-DCA-CoA acyl transferase activity	path:ath00561,path:ath00564	Glycerolipid metabolism|Glycerophospholipid metabolism
AT1G02400	235.673	431.575	39.7706	0.0924391	-3.43535	1.84e-44	5.39e-43	Down	0.846809	0.362434	0.585607	6.92732	6.80368	6.62085	GA2OX6	Araport:AT1G02400,TAIR:AT1G02400,GeneID:839508	Encodes a gibberellin 2-oxidase that acts on C19 gibberellins but not C20 gibberellins.	gibberellin 2-oxidase 6		GO:0009639,GO:0009686,GO:0045487,GO:0046872,GO:0051213,GO:0052634	response to red or far red light|gibberellin biosynthetic process|gibberellin catabolic process|metal ion binding|dioxygenase activity|C-19 gibberellin 2-beta-dioxygenase activity	path:ath00904	Diterpenoid biosynthesis
AT1G02405	63.8513	102.822	24.8804	0.242359	-2.04478	5.43e-08	3.1e-07	Down	0.780586	0.438005	1.00969	2.75072	3.30551	3.57172	AT1G02405	Araport:AT1G02405,TAIR:AT1G02405,GeneID:837769		proline-rich family protein
AT1G02460	116.868	193.803	39.9317	0.206018	-2.27916	2.68e-16	2.87e-15	Down	0.511755	0.385787	0.399478	2.33849	1.72907	2.54827	T6A9.22	Araport:AT1G02460,TAIR:AT1G02460,GeneID:839443		Pectin lyase-like superfamily protein		GO:0004650,GO:0005576,GO:0005618,GO:0005975,GO:0009831	polygalacturonase activity|extracellular region|cell wall|carbohydrate metabolic process|plant-type cell wall modification involved in multidimensional cell growth
AT1G02470	29.5825	46.3777	12.7872	0.274934	-1.86284	0.00445092	0.0118215	Down	0.0223907	0.396662	0.433558	1.56618	0.853352	0.829701	T6A9.26	Araport:AT1G02470,TAIR:AT1G02470,GeneID:837812		Polyketide cyclase/dehydrase and lipid transport superfamily protein
AT1G02610	866.334	32.2478	1700.42	53.2493	5.73469	5.11e-198	1.5e-195	Up	25.9411	25.2552	26.7347	0.317944	0.65078	0.569469	T14P4.10	Araport:AT1G02610,TAIR:AT1G02610,GeneID:837915		RING/FYVE/PHD zinc finger superfamily protein		GO:0004842,GO:0008270,GO:0008299,GO:0009414,GO:0010025,GO:0010143,GO:0010345,GO:0030176,GO:0030433,GO:0042335,GO:1900490	ubiquitin-protein transferase activity|zinc ion binding|isoprenoid biosynthetic process|response to water deprivation|wax biosynthetic process|cutin biosynthetic process|suberin biosynthetic process|integral component of endoplasmic reticulum membrane|ubiquitin-dependent ERAD pathway|cuticle development|positive regulation of hydroxymethylglutaryl-CoA reductase (NADPH) activity
AT1G02620	263.135	5.99156	520.278	85.3925	6.41604	3.95e-63	1.8e-61	Up	7.4802	8.18732	9.72502	0.0483764	0.069313	0.191535	T14P4.21	Araport:AT1G02620,TAIR:AT1G02620,GeneID:839269		Ras-related small GTP-binding family protein		GO:0003400,GO:0003924,GO:0005525,GO:0005783,GO:0005794,GO:0005886,GO:0006886,GO:0006888,GO:0016050,GO:0030127,GO:0061024,GO:0070863,GO:0070971	regulation of COPII vesicle coating|GTPase activity|GTP binding|endoplasmic reticulum|Golgi apparatus|plasma membrane|intracellular protein transport|ER to Golgi vesicle-mediated transport|vesicle organization|COPII vesicle coat|membrane organization|positive regulation of protein exit from endoplasmic reticulum|endoplasmic reticulum exit site	path:ath04141	Protein processing in endoplasmic reticulum
AT1G02640	330.848	27.9877	633.708	22.8001	4.51097	5.37e-75	3.13e-73	Up	4.78373	5.69114	4.95007	0.321695	0.26791	0.119407	BXL2	Araport:AT1G02640,TAIR:AT1G02640,GeneID:837940	encodes a protein similar to a beta-xylosidase located in the extracellular matrix. This is a member of glycosyl hydrolase family 3 and has six other closely related members.	beta-xylosidase 2		GO:0005576,GO:0009044,GO:0009505,GO:0031222,GO:0045493,GO:0046556	extracellular region|xylan 1,4-beta-xylosidase activity|plant-type cell wall|arabinan catabolic process|xylan catabolic process|alpha-L-arabinofuranosidase activity
AT1G02650	27.2584	2.81957	51.6973	18.0087	4.17062	1.37e-09	9.14e-09	Up	0.484404	0.554038	0.78264	0.0581981	0.0125078	0.0345633	T14P4.7	Araport:AT1G02650,TAIR:AT1G02650,GeneID:837951		Tetratricopeptide repeat (TPR)-like superfamily protein
AT1G02660	2764.91	1687.27	3842.54	2.27864	1.18817	4.1e-24	6.34e-23	Up	31.6137	29.5909	30.0752	13.6383	15.8445	12.2955	T14P4.6	Araport:AT1G02660,TAIR:AT1G02660,GeneID:839544		alpha/beta-Hydrolases superfamily protein		GO:0002213,GO:0008970,GO:0009507,GO:0009570,GO:0016042,GO:0031349,GO:0031969,GO:0047714,GO:0052739,GO:0052740,GO:0102549	defense response to insect|phospholipase A1 activity|chloroplast|chloroplast stroma|lipid catabolic process|positive regulation of defense response|chloroplast membrane|galactolipase activity|phosphatidylserine 1-acylhydrolase activity|1-acyl-2-lysophosphatidylserine acylhydrolase activity|1-18:1-2-16:0-monogalactosyldiacylglycerol lipase activity
AT1G02816	550.797	249.125	852.468	3.41738	1.77289	2.04e-22	2.94e-21	Up	12.2087	12.2513	11.4629	5.0255	2.75253	3.25191	AT1G02816	Araport:AT1G02816,TAIR:AT1G02816,GeneID:839308		pectinesterase (Protein of unknown function, DUF538)
AT1G02860	537.644	312.709	762.579	2.43639	1.28475	1.49e-14	1.43e-13	Up	11.4136	10.3386	11.5275	4.00764	4.10518	6.22136	NLA	Araport:AT1G02860,TAIR:AT1G02860,GeneID:839559	Encodes a ubiquitin E3 ligase with RING and SPX domains that is involved in mediating immune responses and mediates degradation of PHT1s at plasma membranes. Targeted by MIR827. Ubiquitinates PHT1;3, PHT1;2, PHT1;1/AtPT1 and PHT1;4/AtPT2.	SPX (SYG1/Pho81/XPR1) domain-containing protein		GO:0004842,GO:0005634,GO:0005886,GO:0009626,GO:0009627,GO:0009697,GO:0009751,GO:0010167,GO:0010337,GO:0016607,GO:0042742,GO:0046872,GO:0080021	ubiquitin-protein transferase activity|nucleus|plasma membrane|plant-type hypersensitive response|systemic acquired resistance|salicylic acid biosynthetic process|response to salicylic acid|response to nitrate|regulation of salicylic acid metabolic process|nuclear speck|defense response to bacterium|metal ion binding|response to benzoic acid
AT1G02930	8424.08	11712.3	5135.89	0.438505	-1.18934	2.42e-29	4.58e-28	Down	105.684	105.537	81.1334	228.901	223.747	245.35	GSTF6	Araport:AT1G02930,TAIR:AT1G02930,GeneID:839515	Encodes glutathione transferase belonging to the phi class of GSTs. Naming convention according to Wagner et al. (2002).	glutathione S-transferase 6		GO:0004364,GO:0005507,GO:0005618,GO:0005737,GO:0005739,GO:0005773,GO:0005829,GO:0006749,GO:0006979,GO:0009407,GO:0009414,GO:0009506,GO:0009651,GO:0042742,GO:0043295,GO:0046686,GO:0050897,GO:2001147,GO:2001227	glutathione transferase activity|copper ion binding|cell wall|cytoplasm|mitochondrion|vacuole|cytosol|glutathione metabolic process|response to oxidative stress|toxin catabolic process|response to water deprivation|plasmodesma|response to salt stress|defense response to bacterium|glutathione binding|response to cadmium ion|cobalt ion binding|camalexin binding|quercitrin binding	path:ath00480	Glutathione metabolism
AT1G03110	87.7595	117.96	57.559	0.488664	-1.03309	0.000655489	0.00208997	Down	0.746433	0.912475	0.804591	1.56973	2.15791	1.52575	TRM82	Araport:AT1G03110,TAIR:AT1G03110,GeneID:839572	Encodes a gene involved in the modification of nucleosides in tRNA. Mutants have no 7-methylguanosine.	Transducin/WD40 repeat-like superfamily protein		GO:0005634,GO:0005829,GO:0043527,GO:0106004	nucleus|cytosol|tRNA methyltransferase complex|tRNA (guanine-N7)-methylation
AT1G03300	506.818	132.362	881.274	6.65778	2.73504	2.34e-34	5.27e-33	Up	9.9072	9.08198	10.5665	0.875221	1.57147	2.20415	ATDUF1	Araport:AT1G03300,TAIR:AT1G03300,GeneID:838627	Member of the plant-specific DUF724 protein family. Arabidopsis has 10 DUF724 proteins. Loss of function mutant has a WT phenotype	agenet domain protein (DOMAIN OF UNKNOWN FUNCTION 724 1)		GO:0005634,GO:0040008	nucleus|regulation of growth
AT1G03457	267.463	39.8938	495.032	12.4115	3.63361	5.37e-60	2.28e-58	Up	4.58375	6.07528	5.334	0.384325	0.447407	0.517782	AtBRN2	Araport:AT1G03457,TAIR:AT1G03457,GeneID:839497		RNA-binding (RRM/RBD/RNP motifs) family protein		GO:0003723,GO:0003729,GO:0005634,GO:0005737,GO:0006402,GO:0009908,GO:0048573,GO:1990904,GO:2000028	RNA binding|mRNA binding|nucleus|cytoplasm|mRNA catabolic process|flower development|photoperiodism, flowering|ribonucleoprotein complex|regulation of photoperiodism, flowering
AT1G03470	109.039	37.6625	180.415	4.79324	2.261	6.15e-16	6.41e-15	Up	3.41535	2.9917	2.47177	0.682699	0.628818	0.62748	NET3A	Araport:AT1G03470,TAIR:AT1G03470,GeneID:839494	Encodes a member of the NET superfamily of proteins that potentially couples different membranes to the actin cytoskeleton in plant cells. It colocalizes with filamentous actin and is localized to the nuclear membrane and the vacuolar membrane.	Kinase interacting (KIP1-like) family protein		GO:0005774,GO:0005856,GO:0031965,GO:0051015	vacuolar membrane|cytoskeleton|nuclear membrane|actin filament binding
AT1G03610	1277.76	684.914	1870.6	2.73385	1.45093	8.17e-28	1.45e-26	Up	21.5935	22.7891	19.5871	8.17948	9.21449	7.02266	F21B7.22	Araport:AT1G03610,TAIR:AT1G03610,GeneID:838961		plant/protein (DUF789)
AT1G03620	119.736	73.3772	166.094	2.26448	1.17918	2.14e-05	8.76e-05	Up	1.50488	1.3306	1.68237	0.485206	0.714507	0.88938	F21B7.23	Araport:AT1G03620,TAIR:AT1G03620,GeneID:839448		ELMO/CED-12 family protein
AT1G03820	113.139	168.483	57.7946	0.343837	-1.5402	7.25e-07	3.66e-06	Down	1.64706	0.7326	1.08492	3.04741	4.08276	3.38853	F21M11.27	Araport:AT1G03820,TAIR:AT1G03820,GeneID:839400		E6-like protein
AT1G03850	279.178	90.9683	467.388	5.12495	2.35754	4.42e-21	6e-20	Up	7.72894	9.29837	4.86692	1.87265	1.06437	1.5472	GRXS13	Araport:AT1G03850,TAIR:AT1G03850,GeneID:839392	Encodes glutaredoxin ATGRXS13, required to facilitate Botrytis cinerea infection of Arabidopsis thaliana plants. Sylvain La Camera et al (2011, PMID:21756272) reported a third splice variant in addition to the two annotated in TAIR10.	Glutaredoxin family protein		GO:0000122,GO:0005634,GO:0005737,GO:0009055,GO:0009735,GO:0015035,GO:0045454,GO:0046872,GO:0050832,GO:0051537,GO:0080183	negative regulation of transcription by RNA polymerase II|nucleus|cytoplasm|electron transfer activity|response to cytokinin|protein disulfide oxidoreductase activity|cell redox homeostasis|metal ion binding|defense response to fungus|2 iron, 2 sulfur cluster binding|response to photooxidative stress
AT1G03870	8809.18	350.796	17267.6	49.2569	5.62225	0	0	Up	323.258	337.329	340.815	6.18848	7.20596	7.88914	FLA9	Araport:AT1G03870,TAIR:AT1G03870,GeneID:839384	fasciclin-like arabinogalactan-protein 9 (Fla9)	FASCICLIN-like arabinoogalactan 9		GO:0005886,GO:0009834,GO:0031225,GO:0046658	plasma membrane|plant-type secondary cell wall biogenesis|anchored component of membrane|anchored component of plasma membrane
AT1G03990	3.9613	7.92261	0	0.0238888	-5.38752	0.00232645	0.00659455	Down	0	0	0	0.0935466	0.110577	0.0277782	F21M11.7	Araport:AT1G03990,TAIR:AT1G03990,GeneID:839342		Long-chain fatty alcohol dehydrogenase family protein		GO:0016021,GO:0046577,GO:0050660	integral component of membrane|long-chain-alcohol oxidase activity|flavin adenine dinucleotide binding
AT1G04020	70.1755	107.38	32.9706	0.306981	-1.70378	2.18e-06	1.03e-05	Down	0.237323	0.389991	0.269768	1.18702	1.12094	0.738781	BARD1	Araport:AT1G04020,TAIR:AT1G04020,GeneID:839329	Encodes a protein containing two tandem BRCA1 C-Terminal (BRCT) domains, which function in phosphorylation-dependent protein#Aeiprotein interactions.Loss of function mutations cause defects in meristem organization due to failure to repress WUS. BARD1 binds to WUS promoter and over expression of BARD reduces the extent of WUS expression.	breast cancer associated RING 1		GO:0000724,GO:0003677,GO:0004842,GO:0005634,GO:0005886,GO:0006281,GO:0009934,GO:0010078,GO:0010492,GO:0031436,GO:0035066,GO:0035067,GO:0045717,GO:0045892,GO:0045944,GO:0046872,GO:0048366,GO:0065004,GO:0070531,GO:0071158,GO:0080182	double-strand break repair via homologous recombination|DNA binding|ubiquitin-protein transferase activity|nucleus|plasma membrane|DNA repair|regulation of meristem structural organization|maintenance of root meristem identity|maintenance of shoot apical meristem identity|BRCA1-BARD1 complex|positive regulation of histone acetylation|negative regulation of histone acetylation|negative regulation …	path:ath03440	Homologous recombination
AT1G04040	2355.69	863.101	3848.28	4.45785	2.15635	1.65e-125	2.14e-123	Up	78.0622	80.7611	80.3833	19.7962	17.4551	18.9442	F21M11.2	Araport:AT1G04040,TAIR:AT1G04040,GeneID:839325		HAD superfamily, subfamily IIIB acid phosphatase		GO:0003993	acid phosphatase activity
AT1G04240	3571.3	1774.83	5367.77	3.02339	1.59617	6.35e-59	2.59e-57	Up	90.4645	83.2517	93.7265	30.7613	27.0247	34.9932	SHY2	Araport:AT1G04240,TAIR:AT1G04240,GeneID:839570	SHY2/IAA3 regulates multiple auxin responses in roots. It is induced rapidly by IAA, and has been shown to be phosphorylated by oat phytochrome A in vitro.	AUX/IAA transcriptional regulator family protein		GO:0003700,GO:0005634,GO:0009733,GO:0009734,GO:0044212	DNA-binding transcription factor activity|nucleus|response to auxin|auxin-activated signaling pathway|transcription regulatory region DNA binding	path:ath04075	Plant hormone signal transduction
AT1G04280	871.287	571.005	1171.57	2.0525	1.03739	8.38e-13	7.17e-12	Up	9.84845	12.1614	9.49447	4.54915	5.66184	5.83961	F19P19.28	Araport:AT1G04280,TAIR:AT1G04280,GeneID:839555		P-loop containing nucleoside triphosphate hydrolases superfamily protein
AT1G04360	34.3685	9.55508	59.1819	6.25636	2.64532	1.22e-06	5.98e-06	Up	0.583094	0.594131	1.10925	0.063828	0.192049	0.126356	ARABIDOPSIS TOXICOS EN LEVADURA 1	Araport:AT1G04360,TAIR:AT1G04360,GeneID:839540		RING/U-box superfamily protein		GO:0016021,GO:0016567,GO:0016740,GO:0046872	integral component of membrane|protein ubiquitination|transferase activity|metal ion binding
AT1G04400	11114.5	7191.72	15037.3	2.09093	1.06415	6e-42	1.66e-40	Up	125.217	120.413	126.495	66.2996	58.9988	61.0121	CRY2	Araport:AT1G04400,TAIR:AT1G04400,GeneID:839529	Blue light receptor mediating blue-light regulated cotyledon expansion and flowering time. Positive regulator of the flowering-time gene CONSTANS. This gene possesses a light-induced CNT2 N-terminal homodimerisation domain.Involved in blue-light induced stomatal opening. Involved in triggering chromatin decondensation. An 80-residue motif (NC80) is sufficient to confer CRY2's physiological functi…	cryptochrome 2		GO:0005524,GO:0005634,GO:0005737,GO:0005773,GO:0006325,GO:0006338,GO:0007623,GO:0009414,GO:0009416,GO:0009637,GO:0009638,GO:0009646,GO:0009785,GO:0009882,GO:0009909,GO:0009911,GO:0010075,GO:0010118,GO:0010244,GO:0010617,GO:0016310,GO:0016604,GO:0016605,GO:0018298,GO:0042752,GO:0042802,GO:0046872,GO:0048574,GO:0051607,GO:0071949,GO:0072387,GO:1901371,GO:1902347,GO:2000028,GO:2000379	ATP binding|nucleus|cytoplasm|vacuole|chromatin organization|chromatin remodeling|circadian rhythm|response to water deprivation|response to light stimulus|response to blue light|phototropism|response to absence of light|blue light signaling pathway|blue light photoreceptor activity|regulation of flower development|positive regulation of flower development|regulation of meristem growth|stomatal m…	path:ath04712	Circadian rhythm - plant
AT1G04430	10570.5	5462.48	15678.6	2.87058	1.52134	2.06e-69	1.08e-67	Up	112.978	122.15	123.871	42.5908	45.0847	43.0556	F19P19.11	Araport:AT1G04430,TAIR:AT1G04430,GeneID:839522		S-adenosyl-L-methionine-dependent methyltransferases superfamily protein		GO:0000139,GO:0005768,GO:0005774,GO:0005794,GO:0005802,GO:0008757,GO:0016021,GO:0052546	Golgi membrane|endosome|vacuolar membrane|Golgi apparatus|trans-Golgi network|S-adenosylmethionine-dependent methyltransferase activity|integral component of membrane|cell wall pectin metabolic process
AT1G04520	49.709	69.3943	30.0237	0.433787	-1.20494	0.00212378	0.00607103	Down	0.504968	0.360837	0.426402	1.05182	1.25247	0.801939	PDLP2	Araport:AT1G04520,TAIR:AT1G04520,GeneID:839502	Encodes a plasmodesmal protein that may be involved in the intercellular movement of molecules through the plasmodesmata.	plasmodesmata-located protein 2		GO:0009506,GO:0010497,GO:0016021,GO:0046739	plasmodesma|plasmodesmata-mediated intercellular transport|integral component of membrane|transport of virus in multicellular host
AT1G04570	172.959	305.357	40.5609	0.132904	-2.91155	1.27e-23	1.92e-22	Down	0.554675	0.359899	0.351967	2.67041	2.62584	4.73534	T1G11.18	Araport:AT1G04570,TAIR:AT1G04570,GeneID:839486		Major facilitator superfamily protein		GO:0016021,GO:0031969	integral component of membrane|chloroplast membrane
AT1G04600	139.834	206.79	72.8788	0.351959	-1.50652	6.46e-07	3.28e-06	Down	0.247335	0.425482	0.180045	0.723272	0.760594	1.05663	XIA	Araport:AT1G04600,TAIR:AT1G04600,GeneID:839480	member of Myosin-like proteins	myosin XI A		GO:0003774,GO:0003779,GO:0005516,GO:0005524,GO:0007015,GO:0016459,GO:0030048	motor activity|actin binding|calmodulin binding|ATP binding|actin filament organization|myosin complex|actin filament-based movement
AT1G04650	130.585	179.347	81.8225	0.456218	-1.1322	1.37e-06	6.68e-06	Down	0.521529	0.577876	0.511317	1.18369	1.22306	1.28751	T1G11.9	Araport:AT1G04650,TAIR:AT1G04650,GeneID:839457		holliday junction resolvase
AT1G04770	731.113	390.574	1071.65	2.74043	1.4544	8.01e-20	1.04e-18	Up	21.3853	15.8918	19.0811	7.9028	5.41265	8.2865	F13M7.24	Araport:AT1G04770,TAIR:AT1G04770,GeneID:839418		Tetratricopeptide repeat (TPR)-like superfamily protein		GO:0005634,GO:0009658,GO:0010438,GO:0010439	nucleus|chloroplast organization|cellular response to sulfur starvation|regulation of glucosinolate biosynthetic process
AT1G04980	621.936	998.198	245.674	0.246034	-2.02307	1.02e-23	1.55e-22	Down	3.23192	4.51417	2.20042	15.9067	13.8873	12.474	PDIL2-2	Araport:AT1G04980,TAIR:AT1G04980,GeneID:839355	Encodes a protein disulfide isomerase-like (PDIL) protein, a member of a multigene family within the thioredoxin (TRX) superfamily. Transcript levels for this gene are up-regulated in response to three different chemical inducers of ER stress (dithiothreitol, beta-mercaptoethanol, and tunicamycin). AtIRE1-2 does not appear to be required for this response, but the atbzip60 mutant has a diminished…	PDI-like 2-2		GO:0003756,GO:0005783,GO:0005788,GO:0009505,GO:0034976,GO:0045454	protein disulfide isomerase activity|endoplasmic reticulum|endoplasmic reticulum lumen|plant-type cell wall|response to endoplasmic reticulum stress|cell redox homeostasis	path:ath04141	Protein processing in endoplasmic reticulum
AT1G05000	31.3202	16.4038	46.2366	2.8479	1.5099	0.00578044	0.0149253	Up	0.357959	0.41357	0.301359	0.099663	0.23067	0.0607065	PFA-DSP1	Araport:AT1G05000,TAIR:AT1G05000,GeneID:839348	Encodes an atypical dual-specificity phosphatase.	Phosphotyrosine protein phosphatases superfamily protein		GO:0004725,GO:0005737,GO:0016791	protein tyrosine phosphatase activity|cytoplasm|phosphatase activity
AT1G05065	45.5572	65.6726	25.4417	0.386681	-1.37078	0.00129539	0.00388616	Down	0.536721	1.05282	0.804387	1.64851	2.00544	2.83242	CLE20	Araport:AT1G05065,TAIR:AT1G05065,GeneID:28716239	Member of a large family of putative ligands homologous to the Clavata3 gene. Consists of a single exon.	CLAVATA3/ESR-RELATED 20		GO:0005615,GO:0007275,GO:0033612,GO:0045168,GO:0048046	extracellular space|multicellular organism development|receptor serine/threonine kinase binding|cell-cell signaling involved in cell fate commitment|apoplast
AT1G05100	24.8145	36.5518	13.0773	0.357024	-1.48591	0.0109981	0.0264143	Down	0.202568	0.369414	0.0860173	0.598698	0.589742	0.740752	MAPKKK18	Araport:AT1G05100,TAIR:AT1G05100,GeneID:839324	member of MEKK subfamily	mitogen-activated protein kinase kinase kinase 18		GO:0004672,GO:0004674,GO:0004709,GO:0005524,GO:0005634,GO:0005737,GO:0006970,GO:0009737,GO:0009738,GO:0009789,GO:0023014,GO:0031098,GO:0032147,GO:0046777,GO:1900057,GO:1902457,GO:2000038	protein kinase activity|protein serine/threonine kinase activity|MAP kinase kinase kinase activity|ATP binding|nucleus|cytoplasm|response to osmotic stress|response to abscisic acid|abscisic acid-activated signaling pathway|positive regulation of abscisic acid-activated signaling pathway|signal transduction by protein phosphorylation|stress-activated protein kinase signaling cascade|activation of…	path:ath04016	MAPK signaling pathway - plant
AT1G05310	150.168	36.8972	263.438	7.08535	2.82484	4.31e-23	6.37e-22	Up	3.39477	4.84184	4.04958	0.662726	0.347798	0.808531	YUP8H12.7	Araport:AT1G05310,TAIR:AT1G05310,GeneID:837030		Pectin lyase-like superfamily protein		GO:0005576,GO:0005618,GO:0030599,GO:0042545,GO:0045330,GO:0045490	extracellular region|cell wall|pectinesterase activity|cell wall modification|aspartyl esterase activity|pectin catabolic process
AT1G05340	103.764	163.176	44.3523	0.271711	-1.87986	1.22e-07	6.74e-07	Down	0.973019	1.78936	1.02079	2.8476	5.96852	5.69302	YUP8H12.4	Araport:AT1G05340,TAIR:AT1G05340,GeneID:837033		cysteine-rich TM module stress tolerance protein
AT1G05575	293.291	405.217	181.366	0.447545	-1.1599	2.88e-10	2.04e-09	Down	6.18532	6.44564	4.61397	14.7002	12.7588	12.8716	AT1G05575	Araport:AT1G05575,TAIR:AT1G05575,GeneID:837061		transmembrane protein
AT1G05630	2426.73	1585.26	3268.2	2.06217	1.04416	3.54e-25	5.73e-24	Up	18.1418	19.368	16.577	8.79158	9.41208	9.22158	5PTASE13	Araport:AT1G05630,TAIR:AT1G05630,GeneID:837069	Encodes an inositol polyphosphate 5-phosphatase with phosphatase activity toward only Ins(1,4,5)P3. Induced in response to ABA and wounding treatments. Expressed in young seedlings and flowers, while no transcripts were detectable in maturated roots, stems, and rosette leaves Modulates the development of cotyledon veins through its regulation of auxin homeostasis. Involved in blue light light#Aei…	Endonuclease/exonuclease/phosphatase family protein		GO:0004445,GO:0005634,GO:0007584,GO:0009611,GO:0009630,GO:0009637,GO:0009737,GO:0009743,GO:0009846,GO:0010087,GO:0010182,GO:0010252,GO:0046855,GO:0046856,GO:0046872,GO:0048364,GO:0052658,GO:0052659	inositol-polyphosphate 5-phosphatase activity|nucleus|response to nutrient|response to wounding|gravitropism|response to blue light|response to abscisic acid|response to carbohydrate|pollen germination|phloem or xylem histogenesis|sugar mediated signaling pathway|auxin homeostasis|inositol phosphate dephosphorylation|phosphatidylinositol dephosphorylation|metal ion binding|root development|inosit…
AT1G05730	25.8456	39.6594	12.0319	0.302286	-1.72601	0.00551882	0.0143228	Down	0.108311	0.225739	0.220764	1.12803	0.278472	0.528096	F3F20.18	Araport:AT1G05730,TAIR:AT1G05730,GeneID:837080		FAM136A-like protein (DUF842)
AT1G05805	3681.08	2193.49	5168.67	2.35683	1.23685	9e-44	2.6e-42	Up	63.5476	65.7095	65.1225	26.9606	29.2653	30.0433	ABA-responsive kinase substrate 2	Araport:AT1G05805,TAIR:AT1G05805,GeneID:837090		basic helix-loop-helix (bHLH) DNA-binding superfamily protein	bHLH	GO:0001228,GO:0003700,GO:0005634,GO:0005829,GO:0006355,GO:0010119,GO:0044212,GO:0046983	DNA-binding transcription activator activity, RNA polymerase II-specific|DNA-binding transcription factor activity|nucleus|cytosol|regulation of transcription, DNA-templated|regulation of stomatal movement|transcription regulatory region DNA binding|protein dimerization activity
AT1G05810	485.572	213.516	757.629	3.5525	1.82884	5.41e-34	1.21e-32	Up	16.4046	18.162	15.7201	4.4296	5.25485	5.12248	RABA5E	Araport:AT1G05810,TAIR:AT1G05810,GeneID:837091		Rab GTPase-like A5A protein		GO:0003924,GO:0005525,GO:0005622,GO:0005886,GO:0006886,GO:0032482	GTPase activity|GTP binding|intracellular|plasma membrane|intracellular protein transport|Rab protein signal transduction
AT1G05840	1377.14	895.684	1858.59	2.07373	1.05223	5.18e-21	7e-20	Up	24.3814	25.1577	24.264	13.9844	10.4741	12.8681	T20M3.11	Araport:AT1G05840,TAIR:AT1G05840,GeneID:837094		Eukaryotic aspartyl protease family protein		GO:0004190,GO:0005886,GO:0006508,GO:0030163,GO:0031225,GO:0046658	aspartic-type endopeptidase activity|plasma membrane|proteolysis|protein catabolic process|anchored component of membrane|anchored component of plasma membrane
AT1G06000	1231.71	2153.91	309.501	0.143726	-2.79861	2.87e-108	2.74e-106	Down	4.76418	4.62281	3.77956	32.9956	32.9197	29.822	T21E18.5	Araport:AT1G06000,TAIR:AT1G06000,GeneID:837109	encodes a flavonol-7-O-rhamnosyltransferase involved in the formation of rhamnosylated flavonols	UDP-Glycosyltransferase superfamily protein		GO:0008194,GO:0043231,GO:0051555,GO:0080043,GO:0080044	UDP-glycosyltransferase activity|intracellular membrane-bounded organelle|flavonol biosynthetic process|quercetin 3-O-glucosyltransferase activity|quercetin 7-O-glucosyltransferase activity
AT1G06160	156.913	23.04	290.785	12.595	3.65478	6.4e-07	3.25e-06	Up	6.29501	3.67096	8.1148	1.02677	0.220672	0.264243	ORA59	Araport:AT1G06160,TAIR:AT1G06160,GeneID:837125	encodes a member of the ERF (ethylene response factor) subfamily B-3 of ERF/AP2 transcription factor family. The protein contains one AP2 domain. There are 18 members in this subfamily including ATERF-1, ATERF-2, AND ATERF-5.	octadecanoid-responsive AP2/ERF 59	ERF	GO:0003677,GO:0003700,GO:0005634,GO:0009723,GO:0009753,GO:0009861,GO:0009873	DNA binding|DNA-binding transcription factor activity|nucleus|response to ethylene|response to jasmonic acid|jasmonic acid and ethylene-dependent systemic resistance|ethylene-activated signaling pathway
AT1G06210	886.686	1210.42	562.953	0.464893	-1.10503	1.68e-18	2.03e-17	Down	6.67304	8.18419	6.68293	16.0308	14.8626	17.657	F9P14.7	Araport:AT1G06210,TAIR:AT1G06210,GeneID:837130		ENTH/VHS/GAT family protein		GO:0005737,GO:0006886,GO:0016020,GO:0043130	cytoplasm|intracellular protein transport|membrane|ubiquitin binding
AT1G06360	145.609	53.019	238.2	4.50048	2.17008	1.14e-17	1.33e-16	Up	3.33413	4.3705	4.75703	1.0027	1.02176	0.87271	T2D23.6	Araport:AT1G06360,TAIR:AT1G06360,GeneID:837147		Fatty acid desaturase family protein		GO:0005789,GO:0006636,GO:0009979,GO:0016021,GO:0016717	endoplasmic reticulum membrane|unsaturated fatty acid biosynthetic process|16:0 monogalactosyldiacylglycerol desaturase activity|integral component of membrane|oxidoreductase activity, acting on paired donors, with oxidation of a pair of donors resulting in the reduction of molecular oxygen to two molecules of water
AT1G06400	2785.33	1699.01	3871.66	2.27929	1.18858	8.97e-33	1.9e-31	Up	66.3376	64.334	64.6748	26.7185	30.61	32.3197	ARA-2	Araport:AT1G06400,TAIR:AT1G06400,GeneID:837151	small GTP-binding protein (ara-2)	Ras-related small GTP-binding family protein		GO:0003924,GO:0005525,GO:0005768,GO:0005886,GO:0006886,GO:0009733,GO:0032482,GO:0042546	GTPase activity|GTP binding|endosome|plasma membrane|intracellular protein transport|response to auxin|Rab protein signal transduction|cell wall biogenesis
AT1G06410	8044.4	4640.83	11448	2.46699	1.30275	1.37e-53	4.94e-52	Up	66.805	73.3945	69.5602	30.8008	29.5138	28.6236	TPS7	Araport:AT1G06410,TAIR:AT1G06410,GeneID:837152	Encodes an enzyme putatively involved in trehalose biosynthesis. Though the protein has both trehalose-6-phosphate synthase (TPS)-like and trehalose-6-phosphate phosphatase (TPP)-like domains, neither activity has been detected in enzymatic assays nor has the protein been able to complement yeast TPS or TPP mutants.	trehalose-phosphatase/synthase 7		GO:0005737,GO:0005829,GO:0005992,GO:0016311,GO:0016757,GO:0070413	cytoplasm|cytosol|trehalose biosynthetic process|dephosphorylation|transferase activity, transferring glycosyl groups|trehalose metabolism in response to stress	path:ath00500	Starch and sucrose metabolism
AT1G06540	25.532	41.0847	9.97935	0.242222	-2.0456	0.0103362	0.0250025	Down	0.0702649	0.158648	0.119347	1.25756	0.123978	0.137037	F12K11.13	Araport:AT1G06540,TAIR:AT1G06540,GeneID:837165		hypothetical protein		GO:0005739,GO:0005774,GO:0007005,GO:0009536,GO:0031307	mitochondrion|vacuolar membrane|mitochondrion organization|plastid|integral component of mitochondrial outer membrane
AT1G06620	624.076	1101.71	146.446	0.133056	-2.90989	4.32e-57	1.7e-55	Down	2.23788	1.68925	2.33915	13.2565	19.3785	16.4789	F12K11.24	Araport:AT1G06620,TAIR:AT1G06620,GeneID:837171	encodes a protein whose sequence is similar to a 2-oxoglutarate-dependent dioxygenase	2-oxoglutarate (2OG) and Fe(II)-dependent oxygenase superfamily protein		GO:0016491,GO:0046872	oxidoreductase activity|metal ion binding
AT1G07200	804.608	456.713	1152.5	2.52442	1.33595	4.85e-25	7.8e-24	Up	6.15348	6.92313	6.06115	2.35908	2.70601	2.86723	F10K1.9	Araport:AT1G07200,TAIR:AT1G07200,GeneID:837231	Encodes a member of an eight-gene family (SMAX1 and SMAX1-like) that has weak similarity to AtHSP101, a ClpB chaperonin required for thermotolerance.	Double Clp-N motif-containing P-loop nucleoside triphosphate hydrolases superfamily protein		GO:0005634,GO:0019538,GO:1902347	nucleus|protein metabolic process|response to strigolactone
AT1G07270	13.8221	22.5286	5.11553	0.227762	-2.1344	0.00695463	0.0175762	Down	0.0460804	0.0240099	0.105663	0.158891	0.353681	0.292079	F10K1.2	Araport:AT1G07270,TAIR:AT1G07270,GeneID:837238		Cell division control, Cdc6		GO:0000278,GO:0003688,GO:0005634,GO:0006270,GO:0033314,GO:0051301	mitotic cell cycle|DNA replication origin binding|nucleus|DNA replication initiation|mitotic DNA replication checkpoint|cell division
AT1G07370	125.65	180.546	70.7546	0.39245	-1.34942	2.55e-07	1.36e-06	Down	1.60262	1.46131	1.1637	3.61166	4.32642	3.3014	PCNA1	Araport:AT1G07370,TAIR:AT1G07370,GeneID:837249	Encodes putative proliferating cell nuclear antigen involved in cell cycle regulation. May be sumoylated.	proliferating cellular nuclear antigen 1		GO:0003677,GO:0005634,GO:0005730,GO:0005737,GO:0006272,GO:0006275,GO:0006298,GO:0019985,GO:0030337,GO:0043626,GO:0051726	DNA binding|nucleus|nucleolus|cytoplasm|leading strand elongation|regulation of DNA replication|mismatch repair|translesion synthesis|DNA polymerase processivity factor activity|PCNA complex|regulation of cell cycle	path:ath03030,path:ath03410,path:ath03420,path:ath03430	DNA replication|Base excision repair|Nucleotide excision repair|Mismatch repair
AT1G07390	84.4894	113.503	55.476	0.488397	-1.03387	0.000438174	0.00144296	Down	0.314715	0.357242	0.257731	0.747444	0.58901	0.657629	RLP1	Araport:AT1G07390,TAIR:AT1G07390,GeneID:837251		receptor like protein 1		GO:0005886,GO:0016021,GO:0042742,GO:0045087	plasma membrane|integral component of membrane|defense response to bacterium|innate immune response
AT1G07400	177.73	46.0068	309.453	6.74055	2.75287	2.36e-22	3.4e-21	Up	5.72521	11.0525	7.5555	1.40359	1.36863	1.00338	F22G5.25	Araport:AT1G07400,TAIR:AT1G07400,GeneID:837252		HSP20-like chaperones superfamily protein		GO:0000302,GO:0005737,GO:0006457,GO:0006979,GO:0009408,GO:0009651,GO:0042542,GO:0043621,GO:0051082,GO:0051259	response to reactive oxygen species|cytoplasm|protein folding|response to oxidative stress|response to heat|response to salt stress|response to hydrogen peroxide|protein self-association|unfolded protein binding|protein complex oligomerization	path:ath04141	Protein processing in endoplasmic reticulum
AT1G07430	235.876	405.639	66.1133	0.162755	-2.61922	1.83e-26	3.11e-25	Down	0.712603	0.853982	0.774643	4.80898	3.48284	6.85627	HAI2	Araport:AT1G07430,TAIR:AT1G07430,GeneID:837255	Encodes a member of the group A protein phosphatase 2C (PP2C) family that is responsible for negatively regulating seed dormancy.	highly ABA-induced PP2C protein 2		GO:0004722,GO:0005267,GO:0005886,GO:0009788,GO:0009939,GO:0010030,GO:0046872,GO:0048838,GO:1902039	protein serine/threonine phosphatase activity|potassium channel activity|plasma membrane|negative regulation of abscisic acid-activated signaling pathway|positive regulation of gibberellic acid mediated signaling pathway|positive regulation of seed germination|metal ion binding|release of seed from dormancy|negative regulation of seed dormancy process	path:ath04016,path:ath04075	MAPK signaling pathway - plant|Plant hormone signal transduction
AT1G07780	167.64	224.585	110.696	0.492804	-1.02091	3.49e-06	1.6e-05	Down	0.965871	1.21173	0.917441	2.35579	2.16419	2.04833	PAI1	Araport:AT1G07780,TAIR:AT1G07780,GeneID:837292	Encodes phosphoribosylanthranilate isomerase which catalyzes the third step of the tryptophan biosynthetic pathway. Member of gene family.	phosphoribosylanthranilate isomerase 1		GO:0000162,GO:0004640,GO:0009507	tryptophan biosynthetic process|phosphoribosylanthranilate isomerase activity|chloroplast	path:ath00400	Phenylalanine, tyrosine and tryptophan biosynthesis
AT1G07900	63.4195	114.074	12.7651	0.111326	-3.16713	1.64e-13	1.48e-12	Down	0.183049	0.604049	0.373097	3.78705	2.64842	4.49223	LBD1	Araport:AT1G07900,TAIR:AT1G07900,GeneID:837305		LOB domain-containing protein 1	LBD	GO:0005739	mitochondrion
AT1G07985	10.4874	0.354812	20.62	59.5035	5.8949	2.92e-05	0.000117045	Up	0.384493	0.676138	0.416334	0	0.0254405	0	AT1G07985	Araport:AT1G07985,TAIR:AT1G07985,GeneID:2745747		Expressed protein
AT1G08050	423.205	632.938	213.473	0.337115	-1.56869	7.08e-20	9.18e-19	Down	1.93642	2.3495	1.50093	6.14411	5.5822	6.24999	T6D22.13	Araport:AT1G08050,TAIR:AT1G08050,GeneID:837321		Zinc finger (C3HC4-type RING finger) family protein		GO:0005886,GO:0009630,GO:0016567,GO:0046872,GO:0048364,GO:0061630	plasma membrane|gravitropism|protein ubiquitination|metal ion binding|root development|ubiquitin protein ligase activity
AT1G08200	10486.2	14638.9	6333.57	0.43268	-1.20863	2.33e-41	6.4e-40	Down	76.8996	73.9511	80.7694	174.715	195.601	189.079	AXS2	Araport:AT1G08200,TAIR:AT1G08200,GeneID:837341	Encodes a putative UDP-D-apiose/UPD-D-xylose synthetase.	UDP-D-apiose/UDP-D-xylose synthase 2		GO:0003824,GO:0005737,GO:0005829,GO:0048046,GO:0050662,GO:0071555	catalytic activity|cytoplasm|cytosol|apoplast|coenzyme binding|cell wall organization	path:ath00520	Amino sugar and nucleotide sugar metabolism
AT1G08250	361.375	633.919	88.8304	0.140178	-2.83467	1.18e-43	3.38e-42	Down	0.987438	0.823196	1.45916	9.33891	7.51355	7.58282	ADT6	Araport:AT1G08250,TAIR:AT1G08250,GeneID:837345	Encodes a plastid-localized arogenate dehydratase involved in phenylalanine biosynthesis. Although this enzyme has sequence similarity to prephenate dehydratases, it is 98 times more active with arogenate than prephenate in enzymatic assays.	arogenate dehydratase 6		GO:0004664,GO:0009094,GO:0009507,GO:0009570,GO:0047769	prephenate dehydratase activity|L-phenylalanine biosynthetic process|chloroplast|chloroplast stroma|arogenate dehydratase activity	path:ath00400	Phenylalanine, tyrosine and tryptophan biosynthesis
AT1G08280	205.999	285.19	126.808	0.444309	-1.17036	2.01e-08	1.2e-07	Down	1.19938	1.53136	1.35446	3.78966	2.84834	2.99243	GALT29A	Araport:AT1G08280,TAIR:AT1G08280,GeneID:837348	Encodes a glycosyltransferase (GT) GALT29A, which belongs to the Carbohydrate Active Enzyme family GT29. GALT29A co-expresses with other arabinogalactan GTs, GALT31A and GLCAT14A. The recombinant GALT29A expressed in Nicotiana benthamiana demonstrated a galactosyltransferase activity, transferring galactose from UDP-galactose to a mixture of various oligosaccharides derived from arabinogalactan p…	Glycosyltransferase family 29 (sialyltransferase) family protein		GO:0000139,GO:0006486,GO:0008373,GO:0008378,GO:0016021	Golgi membrane|protein glycosylation|sialyltransferase activity|galactosyltransferase activity|integral component of membrane
AT1G08290	26.5829	46.3546	6.81114	0.147144	-2.7647	2.41e-06	1.13e-05	Down	0.0955652	0.0497936	0.0973924	0.800265	0.455271	0.4776	WIP3	Araport:AT1G08290,TAIR:AT1G08290,GeneID:837349		WIP domain protein 3	C2H2	GO:0003676,GO:0003700,GO:0005634,GO:0006355,GO:0010468,GO:0046872	nucleic acid binding|DNA-binding transcription factor activity|nucleus|regulation of transcription, DNA-templated|regulation of gene expression|metal ion binding
AT1G08510	6637.45	4338.67	8936.23	2.05979	1.0425	4.97e-37	1.22e-35	Up	86.7196	92.8325	89.6233	43.7771	45.2565	47.7146	FATB	Araport:AT1G08510,TAIR:AT1G08510,GeneID:837372	Encodes an acyl-acyl carrier protein thioesterase. Hydrolyzes primarily saturated acyl-ACPs with chain lengths that vary between 8 and 18 carbons. Involved in saturated fatty acid synthesis. Nuclear-encoded, plastid-targeted globular protein that is functional as dimer.	fatty acyl-ACP thioesterases B		GO:0000036,GO:0006633,GO:0009507,GO:0009536,GO:0016297	acyl carrier activity|fatty acid biosynthetic process|chloroplast|plastid|acyl-[acyl-carrier-protein] hydrolase activity	path:ath00061	Fatty acid biosynthesis
AT1G08570	3673.05	1919.26	5426.84	2.82688	1.49921	3.58e-60	1.53e-58	Up	71.0015	71.9528	70.7843	29.3147	23.4616	26.4661	ACHT4	Araport:AT1G08570,TAIR:AT1G08570,GeneID:837379	Encodes a member of the thioredoxin family protein. Located in the chloroplast. Shows high activity towards the chloroplast 2-Cys peroxiredoxin A, and poor activity towards the chloroplast NADP-malate dehydrogenase.	atypical CYS HIS rich thioredoxin 4		GO:0009507,GO:0009570,GO:0016671,GO:0031969,GO:0045454	chloroplast|chloroplast stroma|oxidoreductase activity, acting on a sulfur group of donors, disulfide as acceptor|chloroplast membrane|cell redox homeostasis
AT1G08860	3.81232	7.62463	0	0.0248356	-5.33145	0.00267814	0.00747643	Down	0	0	0	0.0414719	0.133696	0.0718368	BON3	Araport:AT1G08860,TAIR:AT1G08860,GeneID:837408	Encodes a copine-like protein, which is a member of a newly identified class of calcium-dependent, phospholipid binding proteins that are present in a wide range of organisms. Overexpression of this gene suppresses bon1-1 phenotypes. Double mutant analyses with bon1-1 suggest that BON1 and BON3 have overlapping functions in maintaining cellular homeostasis and inhibiting cell death.	Calcium-dependent phospholipid-binding Copine family protein		GO:0005544,GO:0005886,GO:0006952,GO:0060548,GO:0071277,GO:0090332	calcium-dependent phospholipid binding|plasma membrane|defense response|negative regulation of cell death|cellular response to calcium ion|stomatal closure
AT1G08890	5349.76	3300.92	7398.61	2.24144	1.16442	1.31e-37	3.25e-36	Up	86.9363	82.2619	97.3266	40.6997	40.1292	43.6541	F7G19.23	Araport:AT1G08890,TAIR:AT1G08890,GeneID:837410		Major facilitator superfamily protein		GO:0005351,GO:0005355,GO:0005887,GO:0008645,GO:0009507	carbohydrate:proton symporter activity|glucose transmembrane transporter activity|integral component of plasma membrane|hexose transmembrane transport|chloroplast
AT1G08920	1377.56	1939.57	815.547	0.420517	-1.24977	3.98e-28	7.23e-27	Down	7.91877	8.00132	9.52003	22.2706	20.7534	20.2689	ESL1	Araport:AT1G08920,TAIR:AT1G08920,GeneID:837413	Encodes ESL1, a transporter for monosaccharides.	ERD (early response to dehydration) six-like 1		GO:0005351,GO:0005355,GO:0005887,GO:0008645,GO:0009414,GO:0009651,GO:0009705,GO:0009737,GO:0015145,GO:0015749	carbohydrate:proton symporter activity|glucose transmembrane transporter activity|integral component of plasma membrane|hexose transmembrane transport|response to water deprivation|response to salt stress|plant-type vacuole membrane|response to abscisic acid|monosaccharide transmembrane transporter activity|monosaccharide transmembrane transport
AT1G08980	5206.43	3331.4	7081.47	2.12596	1.08811	3.54e-33	7.63e-32	Up	100.478	103.447	99.979	53.4499	49.8343	46.1977	AMI1	Araport:AT1G08980,TAIR:AT1G08980,GeneID:837418	Encodes an enzyme with similarity to bacterial acylamidohydrolases and exhibits indole-3-acetamide amidohydrolase activity in vitro. This enzyme may be involved in the in vivo biosynthesis of indole-acetic acid from indole-3-acetamide, a native metabolite of A. thaliana. It appears to exist as a monomer.	amidase 1		GO:0004040,GO:0005654,GO:0005737,GO:0005829,GO:0009684,GO:0009851,GO:0016810,GO:0043864	amidase activity|nucleoplasm|cytoplasm|cytosol|indoleacetic acid biosynthetic process|auxin biosynthetic process|hydrolase activity, acting on carbon-nitrogen (but not peptide) bonds|indoleacetamide hydrolase activity	path:ath00330,path:ath00360,path:ath00380	Arginine and proline metabolism|Phenylalanine metabolism|Tryptophan metabolism
AT1G09000	47.7981	65.5891	30.0071	0.458511	-1.12497	0.00548255	0.0142432	Down	0.342096	0.224082	0.308793	0.770346	0.745025	0.476563	NP1	Araport:AT1G09000,TAIR:AT1G09000,GeneID:837421	NPK1-related protein kinase 1S	NPK1-related protein kinase 1		GO:0004674,GO:0004709,GO:0005524,GO:0005737,GO:0006979,GO:0023014,GO:0031098,GO:0032147,GO:0046777	protein serine/threonine kinase activity|MAP kinase kinase kinase activity|ATP binding|cytoplasm|response to oxidative stress|signal transduction by protein phosphorylation|stress-activated protein kinase signaling cascade|activation of protein kinase activity|protein autophosphorylation	path:ath04016	MAPK signaling pathway - plant
AT1G09070	20644.3	30057.7	11230.9	0.373653	-1.42023	5e-50	1.66e-48	Down	154.992	166.685	150.385	452.557	464.75	402.095	SRC2	Araport:AT1G09070,TAIR:AT1G09070,GeneID:837428	SRC2 specifically binds the peptide PIEPPPHH, and moves from ER to a vacuole fraction where it gets internalized. Involved in Protein Storage Vacuole targeting.	soybean gene regulated by cold-2		GO:0000326,GO:0005783,GO:0005789,GO:0005886,GO:0006623,GO:0016021,GO:0032586	protein storage vacuole|endoplasmic reticulum|endoplasmic reticulum membrane|plasma membrane|protein targeting to vacuole|integral component of membrane|protein storage vacuole membrane
AT1G09080	293.529	499.656	87.4022	0.17486	-2.51572	2.18e-05	8.92e-05	Down	0.862869	1.55415	0.358261	5.36286	4.15017	7.19886	BIP3	Araport:AT1G09080,TAIR:AT1G09080,GeneID:837429		Heat shock protein 70 (Hsp 70) family protein		GO:0005524,GO:0005634,GO:0005737,GO:0005788,GO:0006986,GO:0009860,GO:0016020,GO:0016592,GO:0016887,GO:0030433,GO:0030968,GO:0031072,GO:0034605,GO:0034620,GO:0034663,GO:0042026,GO:0042623,GO:0044183,GO:0051082,GO:0051085,GO:0051787	ATP binding|nucleus|cytoplasm|endoplasmic reticulum lumen|response to unfolded protein|pollen tube growth|membrane|mediator complex|ATPase activity|ubiquitin-dependent ERAD pathway|endoplasmic reticulum unfolded protein response|heat shock protein binding|cellular response to heat|cellular response to unfolded protein|endoplasmic reticulum chaperone complex|protein refolding|ATPase activity, coup…	path:ath03060,path:ath04141	Protein export|Protein processing in endoplasmic reticulum
AT1G09155	13.7522	25.1486	2.35579	0.0944031	-3.40502	0.000205303	0.000715767	Down	0.110694	0.0192255	0	0.617972	0.351564	0.485745	PP2-B15	Araport:AT1G09155,TAIR:AT1G09155,GeneID:837435		phloem protein 2-B15		GO:0030246	carbohydrate binding
AT1G09180	30.8799	42.8858	18.874	0.439887	-1.1848	0.0165928	0.0380078	Down	0.337866	0.57614	0.813861	1.51299	1.36571	1.22802	SARA1A	Araport:AT1G09180,TAIR:AT1G09180,GeneID:837438	A member of ARF-like GTPase family. A thaliana has 21 members, in two subfamilies, ARF and ARF-like (ARL) GTPases.	secretion-associated RAS super family 1		GO:0003400,GO:0003924,GO:0005525,GO:0005783,GO:0005794,GO:0005829,GO:0005886,GO:0006886,GO:0006888,GO:0016050,GO:0019898,GO:0030127,GO:0061024,GO:0070863,GO:0070971	regulation of COPII vesicle coating|GTPase activity|GTP binding|endoplasmic reticulum|Golgi apparatus|cytosol|plasma membrane|intracellular protein transport|ER to Golgi vesicle-mediated transport|vesicle organization|extrinsic component of membrane|COPII vesicle coat|membrane organization|positive regulation of protein exit from endoplasmic reticulum|endoplasmic reticulum exit site	path:ath04141	Protein processing in endoplasmic reticulum
AT1G09200	611.725	817.677	405.773	0.496233	-1.01091	3.59e-10	2.52e-09	Down	10.4	14.5429	10.9008	27.0888	26.1293	22.2478	H3.1	Araport:AT1G09200,TAIR:AT1G09200,GeneID:837440		Histone superfamily protein		GO:0000786,GO:0003677,GO:0005634,GO:0046982	nucleosome|DNA binding|nucleus|protein heterodimerization activity
AT1G09350	1146.58	2009.13	284.029	0.141393	-2.82222	2.46e-12	2.04e-11	Down	5.02231	2.0599	5.32725	30.2643	28.8634	32.7689	GolS3	Araport:AT1G09350,TAIR:AT1G09350,GeneID:837457	Predicted to encode a galactinol synthase	galactinol synthase 3		GO:0005737,GO:0006012,GO:0006979,GO:0009409,GO:0046872,GO:0047216	cytoplasm|galactose metabolic process|response to oxidative stress|response to cold|metal ion binding|inositol 3-alpha-galactosyltransferase activity	path:ath00052	Galactose metabolism
AT1G09440	364.487	234.383	494.59	2.10934	1.07679	1.51e-09	1e-08	Up	4.49147	5.30457	4.92319	3.0286	2.17671	2.10233	F14J9.10	Araport:AT1G09440,TAIR:AT1G09440,GeneID:837467		Protein kinase superfamily protein
AT1G09460	36.4596	11.9701	60.949	5.04828	2.33579	1.18e-06	5.78e-06	Up	0.895598	1.01375	0.896985	0.167337	0.11443	0.301152	F14J9.12	Araport:AT1G09460,TAIR:AT1G09460,GeneID:837469		Carbohydrate-binding X8 domain superfamily protein		GO:0005975,GO:0006952,GO:0042973	carbohydrate metabolic process|defense response|glucan endo-1,3-beta-D-glucosidase activity
AT1G09570	4189.77	2406.98	5972.55	2.48083	1.31082	3.66e-51	1.24e-49	Up	26.0385	26.8021	26.0444	12.0736	9.94046	11.3115	PHYA	Araport:AT1G09570,TAIR:AT1G09570,GeneID:837483	Light-labile cytoplasmic red/far-red light photoreceptor involved in the regulation of photomorphogenesis. It exists in two inter-convertible forms: Pr and Pfr (active) and functions as a dimer.The N terminus carries a single tetrapyrrole chromophore, and the C terminus is involved in dimerization. It is the sole photoreceptor mediating the FR high irradiance response (HIR). Major regulator in re…	phytochrome A		GO:0000155,GO:0003729,GO:0004672,GO:0005634,GO:0005737,GO:0006355,GO:0009584,GO:0009630,GO:0009638,GO:0009640,GO:0009883,GO:0010161,GO:0010201,GO:0010203,GO:0010218,GO:0016604,GO:0016607,GO:0017006,GO:0017148,GO:0018298,GO:0031516,GO:0042802,GO:0042803,GO:0046685	phosphorelay sensor kinase activity|mRNA binding|protein kinase activity|nucleus|cytoplasm|regulation of transcription, DNA-templated|detection of visible light|gravitropism|phototropism|photomorphogenesis|red or far-red light photoreceptor activity|red light signaling pathway|response to continuous far red light stimulus by the high-irradiance response system|response to very low fluence red lig…	path:ath04712	Circadian rhythm - plant
AT1G09930	30.5326	52.4794	8.58588	0.163451	-2.61307	9.94e-07	4.92e-06	Down	0.04679	0.0877666	0.104906	0.553159	0.55479	0.41977	OPT2	Araport:AT1G09930,TAIR:AT1G09930,GeneID:837525	oligopeptide transporter	oligopeptide transporter 2		GO:0005886,GO:0005887,GO:0015031,GO:0016020,GO:0035673	plasma membrane|integral component of plasma membrane|protein transport|membrane|oligopeptide transmembrane transporter activity
AT1G09932	2152.98	3845.09	460.876	0.119824	-3.06102	7.24e-107	6.7e-105	Down	6.68286	8.92584	5.94732	56.0861	64.82	67.1717	AT1G09932	Araport:AT1G09932,TAIR:AT1G09932,GeneID:837526		Phosphoglycerate mutase family protein		GO:0005829	cytosol
AT1G09950	845.155	1635.45	54.8598	0.0335632	-4.89697	7.74e-29	1.44e-27	Down	0.950992	0.495508	1.33262	23.7571	36.7654	25.5686	RAS1	Araport:AT1G09950,TAIR:AT1G09950,GeneID:837529		RESPONSE TO ABA AND SALT 1		GO:0006351,GO:0043565	transcription, DNA-templated|sequence-specific DNA binding
AT1G10000	45.4525	2.78105	88.1239	30.7743	4.94365	1.22e-14	1.18e-13	Up	1.68882	1.40436	1.3908	0	0.0180595	0.133079	T27I1.2	Araport:AT1G10000,TAIR:AT1G10000,GeneID:837535		Ribonuclease H-like superfamily protein
AT1G10020	2680.14	877.448	4482.83	5.10737	2.35258	2.18e-122	2.66e-120	Up	45.3368	46.2637	48.2398	8.89381	8.88165	10.9148	T27I1.4	Araport:AT1G10020,TAIR:AT1G10020,GeneID:837537		formin-like protein (DUF1005)
AT1G10120	860.401	365.162	1355.64	3.71356	1.8928	5.29e-53	1.88e-51	Up	12.5795	14.3395	13.5339	3.50988	3.80346	4.08894	CIB4	Araport:AT1G10120,TAIR:AT1G10120,GeneID:837549		basic helix-loop-helix (bHLH) DNA-binding superfamily protein	bHLH	GO:0003700,GO:0005634,GO:0006355,GO:0009637,GO:0040008,GO:0043565,GO:0046983	DNA-binding transcription factor activity|nucleus|regulation of transcription, DNA-templated|response to blue light|regulation of growth|sequence-specific DNA binding|protein dimerization activity
AT1G10140	327.965	145.364	510.566	3.50941	1.81123	2.3e-19	2.91e-18	Up	9.13524	8.80124	11.2226	2.26411	2.65602	3.79112	F14N23.2	Araport:AT1G10140,TAIR:AT1G10140,GeneID:837551		Uncharacterized conserved protein UCP031279
AT1G10150	1041.9	438.216	1645.59	3.75329	1.90816	1.09e-39	2.88e-38	Up	21.1412	18.2638	21.7741	7.12273	4.82994	5.12963	ATPP2-A10	Araport:AT1G10150,TAIR:AT1G10150,GeneID:837552		Carbohydrate-binding protein		GO:0016021,GO:0030246	integral component of membrane|carbohydrate binding
AT1G10370	111.038	179.339	42.7364	0.238541	-2.06769	4.68e-12	3.81e-11	Down	0.995248	0.935454	0.556858	3.80664	4.04925	3.02572	ERD9	Araport:AT1G10370,TAIR:AT1G10370,GeneID:837576	Encodes GSTU17 (Glutathione S-Transferase U17). Functions as a negative component of stress-mediated signal transduction pathways in drought and salt stress responses.	Glutathione S-transferase family protein		GO:0004364,GO:0005737,GO:0005829,GO:0006749,GO:0009407,GO:0009507,GO:0009651,GO:0009704,GO:0040008,GO:0048527,GO:0060416,GO:0080148,GO:0080167	glutathione transferase activity|cytoplasm|cytosol|glutathione metabolic process|toxin catabolic process|chloroplast|response to salt stress|de-etiolation|regulation of growth|lateral root development|response to growth hormone|negative regulation of response to water deprivation|response to karrikin	path:ath00480	Glutathione metabolism
AT1G10410	1171.55	1692.62	650.481	0.384315	-1.37964	3.15e-38	7.95e-37	Down	6.15939	6.41862	6.53829	16.515	17.1208	18.4226	F14N23.31	Araport:AT1G10410,TAIR:AT1G10410,GeneID:837581		CW14 protein (DUF1336)		GO:0005789,GO:0005886,GO:0009626,GO:0009723,GO:0009751,GO:0009873,GO:0010008,GO:0016021,GO:0070273,GO:1900056,GO:1900150	endoplasmic reticulum membrane|plasma membrane|plant-type hypersensitive response|response to ethylene|response to salicylic acid|ethylene-activated signaling pathway|endosome membrane|integral component of membrane|phosphatidylinositol-4-phosphate binding|negative regulation of leaf senescence|regulation of defense response to fungus
AT1G10550	841.336	2.75084	1679.92	651.837	9.34837	8.42e-71	4.56e-69	Up	31.6693	34.0957	28.1116	0.036923	0.119031	0	XTH33	Araport:AT1G10550,TAIR:AT1G10550,GeneID:837596	Encodes a membrane-localized protein that is predicted to function during cell wall modification.Overexpression of XTH33 results in abnormal cell morphology. It's expression is under epigenetic control by ATX1.	xyloglucan:xyloglucosyl transferase 33		GO:0004553,GO:0005618,GO:0005887,GO:0009831,GO:0010411,GO:0016762,GO:0042546,GO:0048046	hydrolase activity, hydrolyzing O-glycosyl compounds|cell wall|integral component of plasma membrane|plant-type cell wall modification involved in multidimensional cell growth|xyloglucan metabolic process|xyloglucan:xyloglucosyl transferase activity|cell wall biogenesis|apoplast
AT1G10640	17.9195	28.6199	7.21904	0.25131	-1.99246	0.00931697	0.0228038	Down	0.0746392	0.122227	0.0325998	0.619778	0.124171	0.218353	F20B24.8	Araport:AT1G10640,TAIR:AT1G10640,GeneID:837607		Pectin lyase-like superfamily protein		GO:0004650,GO:0005576,GO:0005618,GO:0005975,GO:0009831	polygalacturonase activity|extracellular region|cell wall|carbohydrate metabolic process|plant-type cell wall modification involved in multidimensional cell growth
AT1G10650	367.971	511.565	224.377	0.438541	-1.18922	1.58e-12	1.33e-11	Down	2.65297	2.62251	3.01954	5.80133	6.23404	7.78528	F20B24.9	Araport:AT1G10650,TAIR:AT1G10650,GeneID:837608		SBP (S-ribonuclease binding protein) family protein		GO:0004842,GO:0005634,GO:0006952,GO:0043067,GO:0043161,GO:0046872	ubiquitin-protein transferase activity|nucleus|defense response|regulation of programmed cell death|proteasome-mediated ubiquitin-dependent protein catabolic process|metal ion binding
AT1G10740	551.1	296.971	805.23	2.71292	1.43985	1.67e-24	2.64e-23	Up	7.16663	8.40427	7.37183	2.73944	3.0247	3.08427	T16B5.12	Araport:AT1G10740,TAIR:AT1G10740,GeneID:837617		alpha/beta-Hydrolases superfamily protein
AT1G10770	107.127	64.953	149.302	2.29914	1.20109	2.89e-06	1.35e-05	Up	3.89223	3.33441	3.40694	1.67026	1.54205	1.62997	T16B5.9	Araport:AT1G10770,TAIR:AT1G10770,GeneID:837620	Encodes a putative pectin methylesterase/invertase inhibitor. Anti-sense reduction of this gene's transcript results in pollen tube growth retardation and then partial male sterility and reduced seed set.	Plant invertase/pectin methylesterase inhibitor superfamily protein
AT1G10800	4.91136	9.13042	0.692295	0.0753799	-3.72968	0.0160482	0.0369525	Down	0	0.0288736	0.0282372	0.436749	0.293329	0.0540377	T16B5.6	Araport:AT1G10800,TAIR:AT1G10800,GeneID:837623		voltage-gated hydrogen channel-like protein
AT1G10930	616.247	825.709	406.784	0.492972	-1.02042	6.31e-10	4.34e-09	Down	2.20808	2.49422	2.11287	4.41713	5.78752	4.19682	RECQ4A	Araport:AT1G10930,TAIR:AT1G10930,GeneID:837636	DNA helicase involved in the maintenance of genome stability by modulation of the DNA damage response and suppression of homologous recombination.	DNA helicase (RECQl4A)		GO:0000724,GO:0003677,GO:0005524,GO:0005634,GO:0005654,GO:0005694,GO:0005737,GO:0006260,GO:0006281,GO:0006310,GO:0006974,GO:0009378,GO:0009506,GO:0032508,GO:0043138,GO:0043140,GO:0046872,GO:0051276,GO:0070417,GO:0071215	double-strand break repair via homologous recombination|DNA binding|ATP binding|nucleus|nucleoplasm|chromosome|cytoplasm|DNA replication|DNA repair|DNA recombination|cellular response to DNA damage stimulus|four-way junction helicase activity|plasmodesma|DNA duplex unwinding|3'-5' DNA helicase activity|ATP-dependent 3'-5' DNA helicase activity|metal ion binding|chromosome organization|cellular re…	path:ath03440	Homologous recombination
AT1G10990	202.936	84.8083	321.063	3.77987	1.91834	2.51e-09	1.64e-08	Up	3.48262	10.3407	8.99456	1.927	1.71719	2.69824	T19D16.27	Araport:AT1G10990,TAIR:AT1G10990,GeneID:837642		transmembrane protein
AT1G11050	1121.69	1539.28	704.105	0.457507	-1.12813	7.58e-20	9.8e-19	Down	7.05298	7.62893	6.14656	14.7276	16.6978	16.1544	T19D16.6	Araport:AT1G11050,TAIR:AT1G11050,GeneID:837646		Protein kinase superfamily protein
AT1G11190	8.28513	14.5249	2.04534	0.140728	-2.82902	0.00560037	0.0145177	Down	0.0533054	0.0370325	0.0181082	0.367607	0.150486	0.294557	BFN1	Araport:AT1G11190,TAIR:AT1G11190,GeneID:837660	Encodes a bifunctional nuclease that acts on both RNA and DNA involved in nucleic acid degradation to facilitate nucleotide and phosphate recovery during senescence. It has mismatch-specific endonuclease activity with wide recognition of single base mismatches as well as the ability to cleave indel types of mismatches (heteroduplexes with loops).	bifunctional nuclease i		GO:0000014,GO:0003676,GO:0004519,GO:0004521,GO:0006308,GO:0008309,GO:0010150,GO:0016891,GO:0043765,GO:0046872,GO:0080187,GO:0090502	single-stranded DNA endodeoxyribonuclease activity|nucleic acid binding|endonuclease activity|endoribonuclease activity|DNA catabolic process|double-stranded DNA exodeoxyribonuclease activity|leaf senescence|endoribonuclease activity, producing 5'-phosphomonoesters|T/G mismatch-specific endonuclease activity|metal ion binding|floral organ senescence|RNA phosphodiester bond hydrolysis, endonucleol…
AT1G11220	124.011	80.6541	167.368	2.07492	1.05306	0.000256243	0.000877806	Up	2.65647	2.85318	2.62421	0.850958	1.38027	1.87529	T28P6.12	Araport:AT1G11220,TAIR:AT1G11220,GeneID:837663		cotton fiber, putative (DUF761)
AT1G11260	31035	2001.51	60068.4	30.0203	4.90786	0	0	Up	535.976	557.831	539.265	21.1429	19.5831	16.1091	STP1	Araport:AT1G11260,TAIR:AT1G11260,GeneID:837667	Encodes a H+/hexose cotransporter.	sugar transporter 1		GO:0005351,GO:0005355,GO:0005634,GO:0005773,GO:0005886,GO:0005887,GO:0008645,GO:0009506,GO:0015145,GO:0015749	carbohydrate:proton symporter activity|glucose transmembrane transporter activity|nucleus|vacuole|plasma membrane|integral component of plasma membrane|hexose transmembrane transport|plasmodesma|monosaccharide transmembrane transporter activity|monosaccharide transmembrane transport
AT1G11362	18.4319	0.354812	36.5089	105.437	6.72024	3.12e-07	1.64e-06	Up	1.31683	0.947509	1.1503	0	0.0331925	0	AT1G11362	Araport:AT1G11362,TAIR:AT1G11362,GeneID:6240451		Plant invertase/pectin methylesterase inhibitor superfamily protein		GO:0009860,GO:0030599,GO:0046910,GO:0048046,GO:0090404	pollen tube growth|pectinesterase activity|pectinesterase inhibitor activity|apoplast|pollen tube tip
AT1G11380	1983.59	181.323	3785.86	20.831	4.38066	1.5e-205	4.89e-203	Up	59.2372	55.4965	63.0008	3.9237	2.29984	2.71709	T23J18.4	Araport:AT1G11380,TAIR:AT1G11380,GeneID:837680		PLAC8 family protein		GO:0016021	integral component of membrane
AT1G11580	778.244	1061.61	494.878	0.466366	-1.10047	7.09e-18	8.31e-17	Down	5.70236	5.55898	5.70595	11.4396	13.5221	13.0608	PMEPCRA	Araport:AT1G11580,TAIR:AT1G11580,GeneID:837701		methylesterase PCR A		GO:0005576,GO:0005618,GO:0005774,GO:0005829,GO:0009617,GO:0017148,GO:0030598,GO:0030599,GO:0031640,GO:0042545,GO:0045330,GO:0045490,GO:0046910,GO:0050832,GO:0090729	extracellular region|cell wall|vacuolar membrane|cytosol|response to bacterium|negative regulation of translation|rRNA N-glycosylase activity|pectinesterase activity|killing of cells of other organism|cell wall modification|aspartyl esterase activity|pectin catabolic process|pectinesterase inhibitor activity|defense response to fungus|toxin activity	path:ath00040	Pentose and glucuronate interconversions
AT1G11670	352.599	662.748	42.449	0.0640588	-3.96446	4.18e-62	1.84e-60	Down	0.317935	0.364448	0.658829	6.57769	8.40344	6.85175	F25C20.18	Araport:AT1G11670,TAIR:AT1G11670,GeneID:837711		MATE efflux family protein		GO:0006855,GO:0015238,GO:0015297,GO:0016021	drug transmembrane transport|drug transmembrane transporter activity|antiporter activity|integral component of membrane
AT1G11700	585.785	992.481	179.09	0.180371	-2.47096	1.43e-36	3.48e-35	Down	3.47075	3.09439	3.73362	19.5471	13.738	26.8879	F25C20.15	Araport:AT1G11700,TAIR:AT1G11700,GeneID:837714		senescence regulator (Protein of unknown function, DUF584)
AT1G11710	67.7743	100.482	35.0667	0.349116	-1.51822	2.96e-05	0.000118503	Down	0.367873	0.18722	0.340031	1.1294	0.688336	0.875969	F25C20.14	Araport:AT1G11710,TAIR:AT1G11710,GeneID:837715		Pentatricopeptide repeat (PPR) superfamily protein
AT1G11740	35.4615	10.6054	60.3176	5.68462	2.50706	6.52e-05	0.000246876	Up	0.488568	0.636413	0.705372	0.240664	0.0862049	0.00992555	F25C20.11	Araport:AT1G11740,TAIR:AT1G11740,GeneID:837718		ankyrin repeat family protein
AT1G11960	3302.02	5943.12	660.918	0.111244	-3.1682	4.54e-183	1.19e-180	Down	4.90203	4.06313	4.12928	37.8367	43.1763	41.9984	F12F1.17	Araport:AT1G11960,TAIR:AT1G11960,GeneID:837748		ERD (early-responsive to dehydration stress) family protein		GO:0005227,GO:0005886,GO:0016021	calcium activated cation channel activity|plasma membrane|integral component of membrane
AT1G12010	78.0027	47.3722	108.633	2.28657	1.19319	0.000150412	0.00053763	Up	2.06542	1.75631	1.53238	0.911595	0.594751	0.95065	F12F1.12	Araport:AT1G12010,TAIR:AT1G12010,GeneID:837753	Encodes a protein that appears to have 1-amino-cyclopropane-1-carboxylic acid oxidase activity based on mutant analyses.	2-oxoglutarate (2OG) and Fe(II)-dependent oxygenase superfamily protein		GO:0005507,GO:0006952,GO:0009620,GO:0009651,GO:0009693,GO:0009727,GO:0009735,GO:0009815,GO:0010030,GO:0031418,GO:0051213,GO:0071281,GO:0071398,GO:0071732	copper ion binding|defense response|response to fungus|response to salt stress|ethylene biosynthetic process|detection of ethylene stimulus|response to cytokinin|1-aminocyclopropane-1-carboxylate oxidase activity|positive regulation of seed germination|L-ascorbic acid binding|dioxygenase activity|cellular response to iron ion|cellular response to fatty acid|cellular response to nitric oxide	path:ath00270	Cysteine and methionine metabolism
AT1G12090	47577.4	29128.6	66026.1	2.26678	1.18064	8.63e-34	1.91e-32	Up	1227.19	1220.26	1285.55	509.778	622.045	587.93	ELP	Araport:AT1G12090,TAIR:AT1G12090,GeneID:837761	extensin-like protein (ELP)	extensin-like protein		GO:0016021	integral component of membrane
AT1G12100	8.49295	0.961371	16.0245	16.6422	4.05677	0.000705419	0.00223615	Up	0.828815	0.485829	1.16141	0	0.0548397	0.101027	F12F1.2	Araport:AT1G12100,TAIR:AT1G12100,GeneID:837762		Bifunctional inhibitor/lipid-transfer protein/seed storage 2S albumin superfamily protein		GO:0016021	integral component of membrane
AT1G12160	105.431	68.3495	142.513	2.08883	1.0627	0.000227254	0.000786208	Up	2.1774	1.95082	1.51544	1.09873	1.01201	0.712078	T28K15.10	Araport:AT1G12160,TAIR:AT1G12160,GeneID:837768		Flavin-binding monooxygenase family protein		GO:0004497,GO:0004499,GO:0009751,GO:0009753,GO:0019761,GO:0050660,GO:0050661	monooxygenase activity|N,N-dimethylaniline monooxygenase activity|response to salicylic acid|response to jasmonic acid|glucosinolate biosynthetic process|flavin adenine dinucleotide binding|NADP binding
AT1G12380	212.082	304.248	119.915	0.393891	-1.34413	1.32e-10	9.64e-10	Down	0.860995	1.03182	0.672718	2.40333	2.08127	2.33688	F5O11.10	Araport:AT1G12380,TAIR:AT1G12380,GeneID:837793		hypothetical protein
AT1G12440	2802.22	1276.69	4327.75	3.38982	1.76121	1.42e-64	6.63e-63	Up	51.0803	59.0069	51.3938	18.3195	15.8177	15.7291	F5O11.17	Araport:AT1G12440,TAIR:AT1G12440,GeneID:837801		A20/AN1-like zinc finger family protein		GO:0003677,GO:0008270	DNA binding|zinc ion binding
AT1G12450	745.512	314.946	1176.08	3.73937	1.90279	3.28e-48	1.05e-46	Up	15.7615	15.8242	15.4209	3.92158	4.75326	4.46978	F5O11.19	Araport:AT1G12450,TAIR:AT1G12450,GeneID:837802		SNARE associated Golgi protein family
AT1G12500	1515.46	751.462	2279.46	3.03624	1.60229	1.03e-35	2.44e-34	Up	29.1838	29.0616	33.5111	10.5191	11.8324	9.1878	F5O11.25	Araport:AT1G12500,TAIR:AT1G12500,GeneID:837807		Nucleotide-sugar transporter family protein		GO:0008643,GO:0016021	carbohydrate transport|integral component of membrane
AT1G12610	381.327	761.986	0.668497	0.000897956	-10.1211	2e-22	2.89e-21	Down	0.039889	0	0	16.3282	18.6863	12.1555	DDF1	Araport:AT1G12610,TAIR:AT1G12610,GeneID:837817	Encodes a member of the DREB subfamily A-1 of ERF/AP2 transcription factor family (DDF1). The protein contains one AP2 domain. There are six members in this subfamily, including CBF1, CBF2, and CBF3. Overexpression of this gene results in delayed flowering and dwarfism, reduction of gibberellic acid biosynthesis, and increased tolerance to high levels of salt. This gene is expressed in all tissue…	Integrase-type DNA-binding superfamily protein	ERF	GO:0003700,GO:0005634,GO:0009408,GO:0009414,GO:0010371,GO:0019760,GO:0043565,GO:0044212,GO:0048510,GO:0050826,GO:0051510	DNA-binding transcription factor activity|nucleus|response to heat|response to water deprivation|regulation of gibberellin biosynthetic process|glucosinolate metabolic process|sequence-specific DNA binding|transcription regulatory region DNA binding|regulation of timing of transition from vegetative to reproductive phase|response to freezing|regulation of unidimensional cell growth
AT1G12710	3055.95	1421.81	4690.09	3.29774	1.72148	9.92e-60	4.18e-58	Up	69.7249	62.0248	74.5298	24.2919	19.0783	22.2038	PP2-A12	Araport:AT1G12710,TAIR:AT1G12710,GeneID:837826	This gene is predicted to encode a protein with a PP2 domain. This domain in present in lectins found in squash and cucumber, suggesting that this protein could potentially have carbohydrate binding capabilities.	phloem protein 2-A12		GO:0030246	carbohydrate binding
AT1G12730	1543.99	749.465	2338.52	3.11987	1.64149	1.15e-64	5.35e-63	Up	27.3293	26.0104	27.6625	9.21125	8.52115	9.45723	T12C24.26	Araport:AT1G12730,TAIR:AT1G12730,GeneID:837829		GPI transamidase subunit PIG-U		GO:0007049,GO:0016255,GO:0042765,GO:0051301	cell cycle|attachment of GPI anchor to protein|GPI-anchor transamidase complex|cell division	path:ath00563	Glycosylphosphatidylinositol (GPI)-anchor biosynthesis
AT1G12780	1957.17	920.587	2993.75	3.2507	1.70075	3.11e-68	1.57e-66	Up	32.3816	32.3254	34.946	10.7219	9.71361	11.6903	UGE1	Araport:AT1G12780,TAIR:AT1G12780,GeneID:837834	Encodes a UDP-glucose epimerase that catalyzes the interconversion of the sugar nucleotides UDP-glucose UDP-galactose via a UDP-4-keto-hexose intermediate. Responsive to stress.	UDP-D-glucose/UDP-D-galactose 4-epimerase 1		GO:0003978,GO:0005829,GO:0005886,GO:0006012,GO:0033358,GO:0045227,GO:0050373,GO:0071555	UDP-glucose 4-epimerase activity|cytosol|plasma membrane|galactose metabolic process|UDP-L-arabinose biosynthetic process|capsule polysaccharide biosynthetic process|UDP-arabinose 4-epimerase activity|cell wall organization	path:ath00052,path:ath00520	Galactose metabolism|Amino sugar and nucleotide sugar metabolism
AT1G13245	1025.81	513.736	1537.88	2.98947	1.57989	6.58e-28	1.18e-26	Up	41.525	42.5569	47.1604	17.4521	11.2705	17.414	RTFL17	Araport:AT1G13245,TAIR:AT1G13245,GeneID:837884		ROTUNDIFOLIA like 17
AT1G13260	8087.38	4157.39	12017.4	2.89121	1.53167	5.7e-40	1.5e-38	Up	158.082	135.886	156.038	46.8913	61.2349	54.2494	RAV1	Araport:AT1G13260,TAIR:AT1G13260,GeneID:837886	Encodes an AP2/B3 domain transcription factor which is upregulated in response to low temperature. It contains a B3 DNA binding domain. It has circadian regulation and may function as a negative growth regulator.	related to ABI3/VP1 1	RAV	GO:0003677,GO:0003700,GO:0005634,GO:0009741,GO:0009873,GO:0009910,GO:0045892,GO:0048366,GO:0048527	DNA binding|DNA-binding transcription factor activity|nucleus|response to brassinosteroid|ethylene-activated signaling pathway|negative regulation of flower development|negative regulation of transcription, DNA-templated|leaf development|lateral root development
AT1G13340	250.181	453.529	46.832	0.103264	-3.2756	1.44e-54	5.32e-53	Down	0.726093	0.667633	0.594882	6.59227	6.07414	7.52474	T6J4.22	Araport:AT1G13340,TAIR:AT1G13340,GeneID:837894		Regulator of Vps4 activity in the MVB pathway protein		GO:0005737,GO:0005768,GO:0015031,GO:0032511	cytoplasm|endosome|protein transport|late endosome to vacuole transport via multivesicular body sorting pathway
AT1G13360	2466.69	3880.41	1052.97	0.271336	-1.88185	1.49e-61	6.48e-60	Down	15.5903	16.3883	15.5032	53.2287	58.5116	71.5907	AT1G13360	Araport:AT1G13360,TAIR:AT1G13360,GeneID:837896		hypothetical protein
AT1G13420	10.1013	18.1506	2.05196	0.113155	-3.14363	0.00414472	0.0110657	Down	0	0	0.100304	0.177766	0.364684	0.383903	ST4B	Araport:AT1G13420,TAIR:AT1G13420,GeneID:837902	Encodes a sulfotransferase. Unlike the related ST4A protein (At2g14920), in vitro experiements show that this enzyme does not act brassinosteroids. ST4B is expressed in the roots and transcript levels rise in response to cytokinin treatment.	sulfotransferase 4B		GO:0005737,GO:0008146,GO:0009735	cytoplasm|sulfotransferase activity|response to cytokinin
AT1G13450	1658.04	1041.55	2274.53	2.18369	1.12677	1.08e-24	1.71e-23	Up	25.8967	26.5148	24.3617	11.0058	11.8627	13.951	GT-1	Araport:AT1G13450,TAIR:AT1G13450,GeneID:837905	Encodes GT-1, a plant transcription factor that binds to one of the cis-acting elements, BoxII, which resides within the upstream promoter region of light-responsive genes. GT-1 was assumed to act as a molecular switch modulated through Ca(2+)-dependent phosphorylation/dephosphorylation in response to light signals.	Homeodomain-like superfamily protein	Trihelix	GO:0003700,GO:0005634,GO:0006355,GO:0042802,GO:0043565	DNA-binding transcription factor activity|nucleus|regulation of transcription, DNA-templated|identical protein binding|sequence-specific DNA binding
AT1G13520	11.9454	21.4879	2.40282	0.111382	-3.16642	0.000475682	0.00155485	Down	0.0154624	0.0322264	0.0630323	0.487465	0.196434	0.361876	F13B4.3	Araport:AT1G13520,TAIR:AT1G13520,GeneID:837912		hypothetical protein (DUF1262)
AT1G13650	82.8335	113.165	52.5014	0.464788	-1.10536	0.00833851	0.0206586	Down	0.371468	0.609978	0.780084	1.19769	2.06163	0.65861	F21F23.9	Araport:AT1G13650,TAIR:AT1G13650,GeneID:837926		hypothetical protein
AT1G13670	19.676	1.31618	38.0358	29.424	4.87892	1.09e-07	6.04e-07	Up	0.52602	0.680473	0.85033	0	0.0384054	0.0353757	F21F23.11	Araport:AT1G13670,TAIR:AT1G13670,GeneID:837928		hypothetical protein
AT1G13700	528.342	18.8969	1037.79	55.4152	5.79221	5.72e-36	1.36e-34	Up	16.5189	22.9876	13.0764	0.251143	0.52176	0.215441	PGL1	Araport:AT1G13700,TAIR:AT1G13700,GeneID:837931	Encodes a cytosolic 6-phosphogluconolactonase (PGL) thought to be involved in the oxidative pentose-phosphate pathway (OPPP).	6-phosphogluconolactonase 1		GO:0005829,GO:0005975,GO:0009051,GO:0017057	cytosol|carbohydrate metabolic process|pentose-phosphate shunt, oxidative branch|6-phosphogluconolactonase activity	path:ath00030	Pentose phosphate pathway
AT1G13790	161.665	248.052	75.2779	0.303747	-1.71906	6.49e-11	4.85e-10	Down	0.718753	0.41697	0.528605	1.5257	1.82777	2.3917	FDM4	Araport:AT1G13790,TAIR:AT1G13790,GeneID:837939	Belongs to a subgroup of SGS3-like proteins that act redundantly in RNA-directed DNA methylation: AT1G15910 (FDM1), AT4G00380 (FDM2), AT3G12550 (FDM3), AT1G13790 (FDM4), AT1G80790 (FDM5).	XH/XS domain-containing protein		GO:0008168,GO:0080188	methyltransferase activity|RNA-directed DNA methylation
AT1G13800	38.9581	57.1885	20.7278	0.363393	-1.4604	0.00147878	0.0043876	Down	0.187193	0.0696684	0.156706	0.355665	0.42466	0.410717	FAC19	Araport:AT1G13800,TAIR:AT1G13800,GeneID:837941	Encodes a PPR (pentatricopeptide repeat motif) protein that is essential for the initiation of zygotic embryogenesis.	Tetratricopeptide repeat (TPR)-like superfamily protein
AT1G14130	469.817	711.511	228.122	0.3208	-1.64025	3.42e-29	6.44e-28	Down	3.72674	3.01888	3.16005	10.8137	10.6031	10.9023	F7A19.21	Araport:AT1G14130,TAIR:AT1G14130,GeneID:837972		2-oxoglutarate (2OG) and Fe(II)-dependent oxygenase superfamily protein		GO:0009852,GO:0010252,GO:0046872,GO:0050302,GO:0051213	auxin catabolic process|auxin homeostasis|metal ion binding|indole-3-acetaldehyde oxidase activity|dioxygenase activity
AT1G14170	2086.71	1196.06	2977.36	2.49037	1.31636	3.53e-32	7.32e-31	Up	32.4717	37.9018	31.7445	13.6891	15.1973	13.9648	F7A19.25	Araport:AT1G14170,TAIR:AT1G14170,GeneID:837976		RNA-binding KH domain-containing protein		GO:0003723,GO:0005634	RNA binding|nucleus
AT1G14205	269.264	101.091	437.436	4.3489	2.12065	9.26e-21	1.25e-19	Up	18.4158	18.0265	17.5449	3.83244	5.91457	3.18808	AT1G14205	Araport:AT1G14205,TAIR:AT1G14205,GeneID:837981		Ribosomal L18p/L5e family protein		GO:0003735,GO:0005730,GO:0005737,GO:0005840,GO:0006412,GO:0008097,GO:0009507,GO:0009570,GO:0009941	structural constituent of ribosome|nucleolus|cytoplasm|ribosome|translation|5S rRNA binding|chloroplast|chloroplast stroma|chloroplast envelope
AT1G14280	1815.49	476.31	3154.67	6.61633	2.72603	1.75e-122	2.15e-120	Up	36.4554	38.3038	43.4128	6.85629	5.27974	6.59048	PKS2	Araport:AT1G14280,TAIR:AT1G14280,GeneID:837989	Encodes phytochrome kinase substrate 2. PKS proteins are critical for hypocotyl phototropism. Forms a complex with Phot1, Phot2 and NPH3.	phytochrome kinase substrate 2		GO:0005886,GO:0009585,GO:0009638,GO:0048366	plasma membrane|red, far-red light phototransduction|phototropism|leaf development
AT1G14290	1209.39	386.245	2032.53	5.26718	2.39703	2.49e-85	1.71e-83	Up	19.7768	23.4014	21.2602	3.88627	4.51383	4.39622	SBH2	Araport:AT1G14290,TAIR:AT1G14290,GeneID:837990	Encodes one of the two redundant sphingoid base hydroxylases (SBH). Involved in sphingolipid trihydroxy long-chain base (4-hydroxysphinganine) biosynthesis. Double mutants of SBHs were dwarfed and not able to progress from vegetative to reproductive growth.	sphingoid base hydroxylase 2		GO:0000170,GO:0005506,GO:0005783,GO:0005789,GO:0005794,GO:0009640,GO:0016021,GO:0030148,GO:0046520	sphingosine hydroxylase activity|iron ion binding|endoplasmic reticulum|endoplasmic reticulum membrane|Golgi apparatus|photomorphogenesis|integral component of membrane|sphingolipid biosynthetic process|sphingoid biosynthetic process	path:ath00600	Sphingolipid metabolism
AT1G14330	722.539	469.612	975.467	2.07983	1.05647	6.46e-14	5.98e-13	Up	9.77871	9.6276	9.68036	4.22586	5.57842	4.79709	F14L17.10	Araport:AT1G14330,TAIR:AT1G14330,GeneID:837994		Galactose oxidase/kelch repeat superfamily protein		GO:0005634,GO:0016567	nucleus|protein ubiquitination
AT1G14360	1116.46	1542.79	690.135	0.447389	-1.1604	4.84e-17	5.4e-16	Down	11.5202	12.5599	9.12598	27.4835	26.7492	23.3174	UTR3	Araport:AT1G14360,TAIR:AT1G14360,GeneID:837998		UDP-galactose transporter 3		GO:0005459,GO:0005460,GO:0008643,GO:0009553,GO:0009555,GO:0015297,GO:0030173,GO:0030176,GO:0030968,GO:0072334	UDP-galactose transmembrane transporter activity|UDP-glucose transmembrane transporter activity|carbohydrate transport|embryo sac development|pollen development|antiporter activity|integral component of Golgi membrane|integral component of endoplasmic reticulum membrane|endoplasmic reticulum unfolded protein response|UDP-galactose transmembrane transport
AT1G14540	13.6754	24.5888	2.762	0.111675	-3.16263	0.000194397	0.000681147	Down	0.0357897	0.09324	0.018237	0.352593	0.397837	0.628205	PER4	Araport:AT1G14540,TAIR:AT1G14540,GeneID:838016		Peroxidase superfamily protein		GO:0004601,GO:0005576,GO:0006979,GO:0020037,GO:0042744,GO:0046872,GO:0071456	peroxidase activity|extracellular region|response to oxidative stress|heme binding|hydrogen peroxide catabolic process|metal ion binding|cellular response to hypoxia	path:ath00940	Phenylpropanoid biosynthesis
AT1G14720	2108.94	1203.88	3014.01	2.50415	1.32432	2.82e-44	8.23e-43	Up	44.1505	46.1827	46.1242	20.0579	18.7734	18.1807	XTH28	Araport:AT1G14720,TAIR:AT1G14720,GeneID:838037	member of Glycoside Hydrolase Family 16	xyloglucan endotransglucosylase/hydrolase 28		GO:0004553,GO:0005618,GO:0010154,GO:0010411,GO:0016762,GO:0042546,GO:0048046,GO:0071555,GO:0080086	hydrolase activity, hydrolyzing O-glycosyl compounds|cell wall|fruit development|xyloglucan metabolic process|xyloglucan:xyloglucosyl transferase activity|cell wall biogenesis|apoplast|cell wall organization|stamen filament development
AT1G14770	339.294	211.713	466.875	2.2045	1.14045	3.7e-12	3.04e-11	Up	4.92352	5.81872	4.8352	2.35913	2.34556	2.6952	F10B6.17	Araport:AT1G14770,TAIR:AT1G14770,GeneID:838042		RING/FYVE/PHD zinc finger superfamily protein
AT1G14870	294.242	487.486	100.998	0.20716	-2.27118	2.63e-31	5.31e-30	Down	2.21809	2.44106	1.58447	9.76202	10.6218	11.1383	PCR2	Araport:AT1G14870,TAIR:AT1G14870,GeneID:838052	PCR2 encodes a membrane protein involved in zinc transport and detoxification.	PLANT CADMIUM RESISTANCE 2		GO:0005886,GO:0006979,GO:0016021	plasma membrane|response to oxidative stress|integral component of membrane
AT1G15010	196.54	322.39	70.6895	0.219208	-2.18963	4.6e-15	4.54e-14	Down	2.042	2.85752	1.24862	7.3572	11.1795	10.7243	T15D22.5	Araport:AT1G15010,TAIR:AT1G15010,GeneID:838066		mediator of RNA polymerase II transcription subunit
AT1G15085	7.40807	0.658092	14.158	21.8583	4.45011	0.00130879	0.00392288	Up	0.754567	2.88319	1.66615	0	0.133139	0.122636	AT1G15085	Araport:AT1G15085,GeneID:28717241		hypothetical protein
AT1G15100	355.396	500.685	210.107	0.419542	-1.25311	1.44e-13	1.31e-12	Down	5.25198	4.43416	5.55064	12.2646	11.0429	14.7953	RHA2A	Araport:AT1G15100,TAIR:AT1G15100,GeneID:838073	Encodes a putative RING-H2 finger protein RHA2a.	RING-H2 finger A2A		GO:0004842,GO:0005634,GO:0005737,GO:0009651,GO:0009738,GO:0009789,GO:0016567,GO:0046872,GO:0047484	ubiquitin-protein transferase activity|nucleus|cytoplasm|response to salt stress|abscisic acid-activated signaling pathway|positive regulation of abscisic acid-activated signaling pathway|protein ubiquitination|metal ion binding|regulation of response to osmotic stress
AT1G15125	14820.1	2367.74	27272.4	11.5153	3.52548	1.14e-157	2.27e-155	Up	388.372	428.149	414.856	31.9978	31.0983	49.2872	AT1G15125	Araport:AT1G15125,TAIR:AT1G15125,GeneID:838076		S-adenosyl-L-methionine-dependent methyltransferases superfamily protein		GO:0008168,GO:0046872	methyltransferase activity|metal ion binding
AT1G15180	910.381	480.29	1340.47	2.79361	1.48213	8.9e-26	1.47e-24	Up	14.2163	15.997	14.25	6.0384	6.00596	4.57759	F9L1.12	Araport:AT1G15180,TAIR:AT1G15180,GeneID:838084		MATE efflux family protein		GO:0006855,GO:0015238,GO:0015297,GO:0016021	drug transmembrane transport|drug transmembrane transporter activity|antiporter activity|integral component of membrane
AT1G15310	123.283	166.166	80.399	0.483887	-1.04726	0.00102263	0.00313331	Down	0.518688	1.08103	1.35927	2.05617	2.4318	1.89072	ATHSRP54A	Araport:AT1G15310,TAIR:AT1G15310,GeneID:838100	54 kDa protein subunit of SRP that interacts with the signal peptide of secreted proteins	signal recognition particle 54 kDa subunit		GO:0003924,GO:0005525,GO:0005737,GO:0005786,GO:0006614,GO:0008312	GTPase activity|GTP binding|cytoplasm|signal recognition particle, endoplasmic reticulum targeting|SRP-dependent cotranslational protein targeting to membrane|7S RNA binding	path:ath03060	Protein export
AT1G15520	328.796	602.455	55.1368	0.0915698	-3.44898	5.7e-13	4.93e-12	Down	0.42923	0.254145	0.119301	2.84956	3.02079	3.30094	ABCG40	Araport:AT1G15520,TAIR:AT1G15520,GeneID:838122	ABC transporter family involved in ABA transport and resistance to lead. Localizes to plasma membrane. Upregulated by lead. Expressed in leaves, flowers, stomata and roots.	pleiotropic drug resistance 12		GO:0002229,GO:0005524,GO:0005886,GO:0006855,GO:0009723,GO:0009751,GO:0009753,GO:0010193,GO:0015692,GO:0016021,GO:0042626,GO:0046865,GO:0055085,GO:0080168	defense response to oomycetes|ATP binding|plasma membrane|drug transmembrane transport|response to ethylene|response to salicylic acid|response to jasmonic acid|response to ozone|lead ion transport|integral component of membrane|ATPase activity, coupled to transmembrane movement of substances|terpenoid transport|transmembrane transport|abscisic acid transport
AT1G15670	815.195	126.688	1503.7	11.8459	3.56632	7.06e-121	8.36e-119	Up	19.4144	19.3543	20.2146	2.24181	1.42035	1.55201	F7H2.1	Araport:AT1G15670,TAIR:AT1G15670,GeneID:838136	Encodes a member of a family of F-box proteins, called the KISS ME DEADLY (KMD) family, that targets type-B ARR proteins for degradation and is involved in the negative regulation of the cytokinin response. Also named as KFB1, a member of a group of Kelch repeat F-box proteins that negatively regulate phenylpropanoid biosynthesis by targeting the phenypropanoid biosynthesis enzyme phenylalanine a…	Galactose oxidase/kelch repeat superfamily protein		GO:0005829,GO:0080037,GO:2000762	cytosol|negative regulation of cytokinin-activated signaling pathway|regulation of phenylpropanoid metabolic process
AT1G15740	3247.78	1765.35	4730.21	2.6781	1.42121	8.7e-27	1.5e-25	Up	45.5107	47.7139	45.9085	21.1549	13.0633	20.4393	F7H2.8	Araport:AT1G15740,TAIR:AT1G15740,GeneID:838143		Leucine-rich repeat family protein
AT1G15830	391.009	152.93	629.087	4.11597	2.04123	1.03e-25	1.7e-24	Up	5.14435	6.80152	5.69318	1.86232	1.47354	1.14637	F7H2.23	Araport:AT1G15830,TAIR:AT1G15830,GeneID:838153		hypothetical protein
AT1G15870	9.76293	16.7888	2.73707	0.163513	-2.61252	0.00501199	0.0131592	Down	0.0461039	0.0480442	0.0939708	0.249813	0.585702	0.359665	F7H2.20	Araport:AT1G15870,TAIR:AT1G15870,GeneID:838157		Mitochondrial glycoprotein family protein		GO:0003729,GO:0005739,GO:0005759,GO:0008494,GO:0070131,GO:0097177	mRNA binding|mitochondrion|mitochondrial matrix|translation activator activity|positive regulation of mitochondrial translation|mitochondrial ribosome binding
AT1G15900	52.7998	25.3997	80.1999	3.17132	1.66509	2.42e-05	9.84e-05	Up	3.32009	2.51624	2.18736	0.627746	1.10061	0.91568	F7H2.24	Araport:AT1G15900,TAIR:AT1G15900,GeneID:838160		transmembrane protein
AT1G15910	823.065	542.634	1103.5	2.03335	1.02386	1.5e-18	1.82e-17	Up	9.07925	10.1892	9.45747	5.1604	4.67654	4.95461	FDM1	Araport:AT1G15910,TAIR:AT1G15910,GeneID:838161	Belongs to a subgroup of SGS3-like proteins that act redundantly in RNA-directed DNA methylation: AT1G15910 (FDM1), AT4G00380 (FDM2), AT3G12550 (FDM3), AT1G13790 (FDM4), AT1G80790 (FDM5).	XH/XS domain-containing protein		GO:0003677,GO:0003723,GO:0003725,GO:0009506,GO:0010569,GO:0043621,GO:0080188	DNA binding|RNA binding|double-stranded RNA binding|plasmodesma|regulation of double-strand break repair via homologous recombination|protein self-association|RNA-directed DNA methylation
AT1G16060	248.966	364.961	132.971	0.364572	-1.45572	9.12e-13	7.79e-12	Down	1.21629	1.09988	1.6698	3.63439	4.0119	3.78363	ADAP	Araport:AT1G16060,TAIR:AT1G16060,GeneID:838176	Encodes ADAP, an AP2-domain protein that interacts with ARIA. ADAP is a positive regulator of the ABA response and is also involved in regulating seedling growth.	ARIA-interacting double AP2 domain protein	AP2	GO:0000981,GO:0003677,GO:0003700,GO:0005634,GO:0009414,GO:0009651,GO:0009737,GO:0009873,GO:0010187,GO:0040008,GO:0045723,GO:1901959	DNA-binding transcription factor activity, RNA polymerase II-specific|DNA binding|DNA-binding transcription factor activity|nucleus|response to water deprivation|response to salt stress|response to abscisic acid|ethylene-activated signaling pathway|negative regulation of seed germination|regulation of growth|positive regulation of fatty acid biosynthetic process|positive regulation of cutin biosy…
AT1G16110	2194.54	1280.73	3108.35	2.42796	1.27974	1.63e-35	3.81e-34	Up	27.4396	29.2883	25.5577	12.0078	12.2268	11.193	WAKL6	Araport:AT1G16110,TAIR:AT1G16110,GeneID:838180	WAK-like kinase	wall associated kinase-like 6		GO:0004674,GO:0005524,GO:0005886,GO:0007166,GO:0009505,GO:0016021,GO:0030247	protein serine/threonine kinase activity|ATP binding|plasma membrane|cell surface receptor signaling pathway|plant-type cell wall|integral component of membrane|polysaccharide binding
AT1G16130	1020.44	676.447	1364.44	2.01889	1.01356	1.67e-09	1.11e-08	Up	11.7995	12.7588	8.89944	5.25742	7.01626	4.98739	WAKL2	Araport:AT1G16130,TAIR:AT1G16130,GeneID:838182	wall-associated kinase like	wall associated kinase-like 2
AT1G16150	10.0238	2.96646	17.0811	5.81103	2.53879	0.0145676	0.0339212	Up	0.227596	0.200686	0.0178421	0.0344958	0.0370688	0.00853613	WAKL4	Araport:AT1G16150,TAIR:AT1G16150,GeneID:838184	Encodes a cell-wall associated kinase like protein of the receptor-like kinase (RLK) superfamily. Likely involved in Arabidopsis root mineral responses to Zn2+, Cu2+, K+, Na+ and Ni+.	wall associated kinase-like 4
AT1G16170	400.544	241.955	559.133	2.31159	1.20888	1.53e-13	1.38e-12	Up	12.7813	14.3937	12.8057	7.01647	5.86431	5.21461	T24D18.25	Araport:AT1G16170,TAIR:AT1G16170,GeneID:838186		ephrin-A3 protein
AT1G16260	2734.17	1806.6	3661.75	2.02761	1.01978	5e-22	7.1e-21	Up	33.009	33.9999	30.0442	15.288	17.9149	16.805	F3O9.6	Araport:AT1G16260,TAIR:AT1G16260,GeneID:838195		Wall-associated kinase family protein
AT1G16370	293.441	581.058	5.82445	0.0100138	-6.64187	2.48e-63	1.13e-61	Down	0.0498887	0.0649854	0.101685	8.19565	8.00152	6.36084	2023-10-06	Araport:AT1G16370,TAIR:AT1G16370,GeneID:838207		organic cation/carnitine transporter 6		GO:0005524,GO:0006811,GO:0009705,GO:0016021,GO:0022857,GO:0042631,GO:0071472	ATP binding|ion transport|plant-type vacuole membrane|integral component of membrane|transmembrane transporter activity|cellular response to water deprivation|cellular response to salt stress
AT1G16390	86.2785	36.1473	136.41	3.76765	1.91366	1.67e-07	9.04e-07	Up	1.28866	1.67564	1.67358	0.707806	0.325972	0.255774	2023-10-03	Araport:AT1G16390,TAIR:AT1G16390,GeneID:838209		organic cation/carnitine transporter 3		GO:0005524,GO:0006811,GO:0009705,GO:0016021,GO:0022857,GO:0070417	ATP binding|ion transport|plant-type vacuole membrane|integral component of membrane|transmembrane transporter activity|cellular response to cold
AT1G16400	171.465	303.773	39.1563	0.129143	-2.95296	8.92e-30	1.7e-28	Down	0.527225	0.268862	0.514441	3.94531	3.25391	3.44571	CYP79F2	Araport:AT1G16400,TAIR:AT1G16400,GeneID:838210	Encodes cytochrome P450 CYP79F2.	cytochrome P450, family 79, subfamily F, polypeptide 2		GO:0005506,GO:0005783,GO:0005789,GO:0016020,GO:0016021,GO:0016709,GO:0019761,GO:0020037	iron ion binding|endoplasmic reticulum|endoplasmic reticulum membrane|membrane|integral component of membrane|oxidoreductase activity, acting on paired donors, with incorporation or reduction of molecular oxygen, NAD(P)H as one donor, and incorporation of one atom of oxygen|glucosinolate biosynthetic process|heme binding	path:ath00966	Glucosinolate biosynthesis
AT1G16410	11832.9	17234.5	6431.36	0.373188	-1.42202	6.25e-31	1.24e-29	Down	48.0137	35.5216	49.1855	109.947	129.236	132.521	CYP79F1	Araport:AT1G16410,TAIR:AT1G16410,GeneID:838211	member of CYP79F	cytochrome p450 79f1		GO:0005506,GO:0005783,GO:0005789,GO:0009625,GO:0016020,GO:0016021,GO:0016709,GO:0019761,GO:0020037	iron ion binding|endoplasmic reticulum|endoplasmic reticulum membrane|response to insect|membrane|integral component of membrane|oxidoreductase activity, acting on paired donors, with incorporation or reduction of molecular oxygen, NAD(P)H as one donor, and incorporation of one atom of oxygen|glucosinolate biosynthetic process|heme binding	path:ath00966	Glucosinolate biosynthesis
AT1G16420	29.8017	50.4382	9.16523	0.181998	-2.458	3.16e-05	0.000126061	Down	0.167007	0.0316428	0.216618	1.00215	0.530412	0.873501	MC8	Araport:AT1G16420,TAIR:AT1G16420,GeneID:838212	Encodes a metacaspase (cysteine-type endopeptidase) that is involved in promoting programmed cell death in response to hydrogen peroxide (H2O2), UV light, and methyl viologen (MV). Transcript levels rise in response to UV-C, H2O2, and MV. In vitro assays demonstrate that this enzyme has a preference for cleaving after an arginine residue, and it has a pH optimum of 8.0.	metacaspase 8		GO:0004197,GO:0006979,GO:0010225,GO:0010421,GO:0012501,GO:0042542	cysteine-type endopeptidase activity|response to oxidative stress|response to UV-C|hydrogen peroxide-mediated programmed cell death|programmed cell death|response to hydrogen peroxide
AT1G16500	469.053	855.345	82.7601	0.096598	-3.37186	4.76e-68	2.39e-66	Down	1.26641	1.97956	1.09344	14.989	14.3939	17.6492	F3O9.30	Araport:AT1G16500,TAIR:AT1G16500,GeneID:838220		filamentous hemagglutinin transporter
AT1G16515	33.4951	61.5471	5.44317	0.0885879	-3.49675	1.98e-09	1.31e-08	Down	0.277329	0.144501	0.141316	3.10787	1.43129	2.1635	AT1G16515	Araport:AT1G16515,TAIR:AT1G16515,GeneID:28717243		transmembrane protein
AT1G16850	1929.51	2634.21	1224.82	0.465075	-1.10446	5.37e-22	7.59e-21	Down	31.3474	26.545	34.6047	66.5803	70.9835	70.3962	F17F16.17	Araport:AT1G16850,TAIR:AT1G16850,GeneID:838256		transmembrane protein
AT1G17060	461.682	88.9276	834.436	9.33531	3.2227	7.88e-77	4.74e-75	Up	9.56928	9.74565	9.13472	1.11508	0.762521	1.31555	CYP72C1	Araport:AT1G17060,TAIR:AT1G17060,GeneID:838276	Encodes a protein with similarity to other cytochrome P450's and is a homolog of BAS1. Over expression causes a dwarf phenotype resembling brassinolide resistant mutants. Double mutant analysis of sob7/bas1 loss of function mutants suggests these genes have redundant functions in light responsiveness. SOB7 may function in metabolizing brassinolides. Expressed in leaf, root, stem and silique but e…	cytochrome p450 72c1		GO:0004497,GO:0005506,GO:0016021,GO:0016705,GO:0020037,GO:0040008	monooxygenase activity|iron ion binding|integral component of membrane|oxidoreductase activity, acting on paired donors, with incorporation or reduction of molecular oxygen|heme binding|regulation of growth
AT1G17090	49.5126	75.04	23.9852	0.31952	-1.64602	1.42e-05	5.96e-05	Down	0.354711	0.436847	0.361493	1.15955	1.26311	1.35214	F20D23.31	Araport:AT1G17090,TAIR:AT1G17090,GeneID:838279		transmembrane protein
AT1G17100	2961.47	4183.62	1739.33	0.415707	-1.26636	2.86e-39	7.43e-38	Down	39.7651	45.7004	39.2996	111.057	99.6036	103.546	HBP1	Araport:AT1G17100,TAIR:AT1G17100,GeneID:838280		SOUL heme-binding family protein
AT1G17380	2663.7	5165.94	161.449	0.0312673	-4.9992	7.12e-69	3.67e-67	Down	1.94292	1.05452	1.87694	47.8132	61.8354	52.9214	JAZ5	Araport:AT1G17380,TAIR:AT1G17380,GeneID:838310		jasmonate-zim-domain protein 5		GO:0005634,GO:0006952,GO:0009611,GO:0009753,GO:0031347,GO:2000022	nucleus|defense response|response to wounding|response to jasmonic acid|regulation of defense response|regulation of jasmonic acid mediated signaling pathway	path:ath04075	Plant hormone signal transduction
AT1G17420	24042.2	46863.4	1221.02	0.0260549	-5.2623	0	0	Down	9.01519	9.16528	8.52971	325.171	397.441	346.982	LOX3	Araport:AT1G17420,TAIR:AT1G17420,GeneID:838314	LOX3 encode a Lipoxygenase. Lipoxygenases (LOXs) catalyze the oxygenation of fatty acids (FAs).	lipoxygenase 3		GO:0009507,GO:0009555,GO:0009611,GO:0009620,GO:0009644,GO:0009753,GO:0009901,GO:0016165,GO:0031408,GO:0034440,GO:0046872,GO:0048653,GO:0080086	chloroplast|pollen development|response to wounding|response to fungus|response to high light intensity|response to jasmonic acid|anther dehiscence|linoleate 13S-lipoxygenase activity|oxylipin biosynthetic process|lipid oxidation|metal ion binding|anther development|stamen filament development	path:ath00591,path:ath00592	Linoleic acid metabolism|alpha-Linolenic acid metabolism
AT1G17455	413.223	269.714	556.733	2.06223	1.04421	9.3e-09	5.76e-08	Up	9.70157	13.0112	12.8335	7.42681	4.98798	5.65957	ELF4-L4	Araport:AT1G17455,TAIR:AT1G17455,GeneID:838318		ELF4-like 4		GO:0005634,GO:0009648,GO:0009649,GO:0042753,GO:0042803,GO:0048511	nucleus|photoperiodism|entrainment of circadian clock|positive regulation of circadian rhythm|protein homodimerization activity|rhythmic process
AT1G17560	48.1248	70.6121	25.6375	0.363543	-1.4598	0.000237883	0.000820037	Down	0.495858	0.449328	0.70308	1.31685	1.78025	1.63981	HLL	Araport:AT1G17560,TAIR:AT1G17560,GeneID:838332	Encodes HUELLENLOS (HLL), a mitochondrial ribosome protein, similar to L14 ribosomal protein of eubacteria. HLL is essential for normal ovule development.	Ribosomal protein L14p/L23e family protein		GO:0003735,GO:0005739,GO:0005762,GO:0006412,GO:0009553,GO:0009741,GO:0048481,GO:0060548,GO:0070180,GO:0080060	structural constituent of ribosome|mitochondrion|mitochondrial large ribosomal subunit|translation|embryo sac development|response to brassinosteroid|plant ovule development|negative regulation of cell death|large ribosomal subunit rRNA binding|integument development	path:ath03010	Ribosome
AT1G17615	8.12787	16.2557	0	0.0116241	-6.42674	2.8e-05	0.000112611	Down	0	0	0	0.452823	0.295435	0.0800378	F1L3.31	Araport:AT1G17615,TAIR:AT1G17615,GeneID:838338		Disease resistance protein (TIR-NBS class)		GO:0005524,GO:0007165,GO:0009816,GO:0042742,GO:0043531	ATP binding|signal transduction|defense response to bacterium, incompatible interaction|defense response to bacterium|ADP binding
AT1G17640	208.918	126.318	291.517	2.30914	1.20736	2.95e-10	2.09e-09	Up	3.8681	3.98934	3.69822	1.85955	1.73088	1.64618	F11A6.17	Araport:AT1G17640,TAIR:AT1G17640,GeneID:838341		RNA-binding (RRM/RBD/RNP motifs) family protein		GO:0003723,GO:0003729,GO:0005634,GO:0005681,GO:0005829,GO:0006397,GO:0008380,GO:0010228,GO:0051028,GO:1901000,GO:1990904,GO:2000070	RNA binding|mRNA binding|nucleus|spliceosomal complex|cytosol|mRNA processing|RNA splicing|vegetative to reproductive phase transition of meristem|mRNA transport|regulation of response to salt stress|ribonucleoprotein complex|regulation of response to water deprivation	path:ath03040	Spliceosome
AT1G17710	8.82734	2.33679	15.3179	6.68197	2.74027	0.00524144	0.01368	Up	0.329505	0.171686	0.251854	0.0162311	0.069767	0.0321316	PEPC1	Araport:AT1G17710,TAIR:AT1G17710,GeneID:838347	Encodes a phosphoethanolamine/phosphocholine phosphatase. It is likely to be involved in the liberation of inorganic phosphate from intracellular sources. Expression is upregulated in the shoot of cax1/cax3 mutant.	Pyridoxal phosphate phosphatase-related protein		GO:0004427,GO:0046872,GO:0051262,GO:0052731,GO:0052732	inorganic diphosphatase activity|metal ion binding|protein tetramerization|phosphocholine phosphatase activity|phosphoethanolamine phosphatase activity	path:ath00750	Vitamin B6 metabolism
AT1G17744	24.964	41.3642	8.56378	0.206766	-2.27393	0.00152224	0.00449679	Down	0.221281	0.253653	0.0902046	1.98381	0.562228	0.323672	AT1G17744	Araport:AT1G17744,TAIR:AT1G17744,GeneID:6240445		hypothetical protein		GO:0004617,GO:0005634,GO:0005829,GO:0006564,GO:0009507,GO:0009570,GO:0051287	phosphoglycerate dehydrogenase activity|nucleus|cytosol|L-serine biosynthetic process|chloroplast|chloroplast stroma|NAD binding
AT1G17750	225.983	421.569	30.3978	0.0722074	-3.79171	9.09e-57	3.55e-55	Down	0.201245	0.16523	0.186448	2.74563	2.82776	2.43223	PEPR2	Araport:AT1G17750,TAIR:AT1G17750,GeneID:838353	Encodes PEPR2, a plasma membrane leucine-rich repeat receptor kinase functioning as a receptor for the Pep1 and Pep2 peptides. Pep1 and Pep2 are amino acids that induce the transcription of defense-related genes.	PEP1 receptor 2
AT1G17830	42.2928	78.148	6.4376	0.0828849	-3.59275	3.72e-12	3.06e-11	Down	0.145703	0.0414097	0.0674951	1.07006	1.12182	1.03333	F2H15.6	Araport:AT1G17830,TAIR:AT1G17830,GeneID:838361		hypothetical protein (DUF789)
AT1G17920	235.759	151.289	320.228	2.11508	1.08071	7.62e-09	4.76e-08	Up	2.16805	2.215	2.3828	1.02608	1.0201	1.30581	HDG12	Araport:AT1G17920,TAIR:AT1G17920,GeneID:838371	Encodes a homeobox-leucine zipper family protein belonging to the HD-ZIP IV family. Together with HDG11, it is involved in trichome branching.	homeodomain GLABROUS 12	HD-ZIP	GO:0003700,GO:0005634,GO:0008289,GO:0010091,GO:0043565,GO:0048497	DNA-binding transcription factor activity|nucleus|lipid binding|trichome branching|sequence-specific DNA binding|maintenance of floral organ identity
AT1G17970	1312.48	750.004	1874.95	2.50227	1.32324	1.69e-23	2.55e-22	Up	21.6619	18.3937	21.9067	7.63033	9.81824	8.39541	F2H15.19	Araport:AT1G17970,TAIR:AT1G17970,GeneID:838377		RING/U-box superfamily protein		GO:0016567,GO:0016740,GO:0040008,GO:0046872	protein ubiquitination|transferase activity|regulation of growth|metal ion binding
AT1G17990	28.4551	6.09702	50.8131	8.32774	3.05792	2.79e-07	1.47e-06	Up	0.994875	0.706189	0.484907	0.142048	0.0763215	0.0562406	T10F20.3	Araport:AT1G17990,TAIR:AT1G17990,GeneID:838379		FMN-linked oxidoreductases superfamily protein		GO:0010181,GO:0016491	FMN binding|oxidoreductase activity
AT1G18020	22.345	7.28942	37.4005	5.09869	2.35013	0.000198876	0.000695037	Up	0.405036	0.625307	0.642103	0.206906	0.0635254	0.0731425	AT1G18020	Araport:AT1G18020,TAIR:AT1G18020,GeneID:838382		FMN-linked oxidoreductases superfamily protein		GO:0010181,GO:0016491	FMN binding|oxidoreductase activity	path:ath00592	alpha-Linolenic acid metabolism
AT1G18030	769.506	434.067	1104.94	2.5434	1.34676	3.98e-24	6.15e-23	Up	15.7905	18.4846	15.0847	6.89266	5.9159	7.53832	T10F20.4	Araport:AT1G18030,TAIR:AT1G18030,GeneID:838383		Protein phosphatase 2C family protein		GO:0004722,GO:0046872	protein serine/threonine phosphatase activity|metal ion binding
AT1G18200	165.524	264.085	66.9633	0.253697	-1.97882	6.1e-19	7.54e-18	Down	1.64467	1.40443	1.51316	5.85105	6.14238	6.83839	RABA6b	Araport:AT1G18200,TAIR:AT1G18200,GeneID:838399		Rab GTPase-like A1I protein		GO:0003924,GO:0005525,GO:0005768,GO:0005886,GO:0006886,GO:0032482	GTPase activity|GTP binding|endosome|plasma membrane|intracellular protein transport|Rab protein signal transduction
AT1G18210	5414.25	7801.9	3026.6	0.387923	-1.36616	6.84e-38	1.71e-36	Down	52.8546	57.9914	46.7983	157.745	135.949	131.561	T10F20.22	Araport:AT1G18210,TAIR:AT1G18210,GeneID:838401		Calcium-binding EF-hand family protein		GO:0005509,GO:0005773,GO:0005886	calcium ion binding|vacuole|plasma membrane	path:ath04626	Plant-pathogen interaction
AT1G18300	629.528	1013.62	245.434	0.24231	-2.04507	2.02e-24	3.17e-23	Down	5.26071	4.81762	4.50836	20.7703	26.9817	14.7875	NUDT4	Araport:AT1G18300,TAIR:AT1G18300,GeneID:838410		nudix hydrolase homolog 4		GO:0000210,GO:0005634,GO:0005737,GO:0005829,GO:0046872,GO:0047631	NAD+ diphosphatase activity|nucleus|cytoplasm|cytosol|metal ion binding|ADP-ribose diphosphatase activity
AT1G18400	111.726	38.9679	184.485	4.7256	2.2405	1.83e-11	1.43e-10	Up	3.05548	3.24531	1.78151	0.405219	0.528753	0.859484	BEE1	Araport:AT1G18400,TAIR:AT1G18400,GeneID:838421	Encodes the brassinosteroid signaling component BEE1 (BR-ENHANCED EXPRESSION 1). Positively modulates the shade avoidance syndrome in Arabidopsis seedlings.	BR enhanced expression 1	bHLH	GO:0003677,GO:0003700,GO:0005634,GO:0006351,GO:0006355,GO:0046983,GO:1902448	DNA binding|DNA-binding transcription factor activity|nucleus|transcription, DNA-templated|regulation of transcription, DNA-templated|protein dimerization activity|positive regulation of shade avoidance
AT1G18590	1680.48	2683.25	677.702	0.252685	-1.98459	3.8e-54	1.39e-52	Down	11.1448	8.6396	10.7423	39.6488	46.2672	40.1875	SOT17	Araport:AT1G18590,TAIR:AT1G18590,GeneID:838440	encodes a desulfoglucosinolate sulfotransferase, involved in the final step of glucosinolate core structure biosynthesis. Has a broad-substrate specificity with preference with methionine-derived desulfoglucosinolates.	sulfotransferase 17		GO:0005737,GO:0019761,GO:0047364	cytoplasm|glucosinolate biosynthetic process|desulfoglucosinolate sulfotransferase activity	path:ath00966	Glucosinolate biosynthesis
AT1G18620	3938.8	1067.42	6810.18	6.38528	2.67475	1.34e-118	1.53e-116	Up	32.4229	34.6221	37.2183	5.52353	6.42472	5.09179	TRM3	Araport:AT1G18620,TAIR:AT1G18620,GeneID:838443		LONGIFOLIA protein		GO:0005737,GO:0005856,GO:0008017,GO:0051513	cytoplasm|cytoskeleton|microtubule binding|regulation of monopolar cell growth
AT1G18670	750.557	349.847	1151.27	3.28611	1.71638	7.39e-41	2.01e-39	Up	7.09351	7.2494	7.01987	2.36011	1.89058	2.56665	IBS1	Araport:AT1G18670,TAIR:AT1G18670,GeneID:838448	Encodes a cyclin-dependent kinase-like protein with a ser/thr protein kinase domain and an N-terminal myristoylation sequence. Mutants in this gene are unable to express female sterility in response to beta-aminobutyric acid, as wild type plants do.	Protein kinase superfamily protein
AT1G18710	936.192	1683.8	188.584	0.112105	-3.15707	3.67e-79	2.31e-77	Down	3.72261	2.41993	3.82992	26.6326	34.0426	32.256	MYB47	Araport:AT1G18710,TAIR:AT1G18710,GeneID:838453	Member of the R2R3 factor gene family.	myb domain protein 47	MYB	GO:0000902,GO:0003677,GO:0005634,GO:0010091,GO:0035017,GO:1901957	cell morphogenesis|DNA binding|nucleus|trichome branching|cuticle pattern formation|regulation of cutin biosynthetic process
AT1G18740	4120.68	5550.4	2690.96	0.484902	-1.04423	1.27e-17	1.46e-16	Down	41.9986	34.8309	40.0124	90.5399	90.3271	70.5672	F6A14.15	Araport:AT1G18740,TAIR:AT1G18740,GeneID:838456		ROH1, putative (DUF793)
AT1G19020	1986.17	3097.06	875.285	0.282625	-1.82304	1.3e-08	7.91e-08	Down	30.0648	33.8432	20.0223	71.6563	123.297	114.605	F14D16.17	Araport:AT1G19020,TAIR:AT1G19020,GeneID:838483		CDP-diacylglycerol-glycerol-3-phosphate 3-phosphatidyltransferase
AT1G19050	196.755	271.308	122.203	0.450107	-1.15166	2.44e-06	1.15e-05	Down	3.31273	3.55222	1.88375	7.00026	5.69263	7.70147	ARR7	Araport:AT1G19050,TAIR:AT1G19050,GeneID:838487	Encodes a member of the Arabidopsis response regulator (ARR) family, most closely related to ARR15. A two-component response regulator protein containing a phosphate accepting domain in the receiver domain but lacking a DNA binding domain in the output domain. Involved in response to cytokinin and meristem stem cell maintenance. Arr7 protein is stabilized by cytokinin.	response regulator 7		GO:0000156,GO:0005634,GO:0006355,GO:0009735,GO:0009736,GO:0010200,GO:0019827	phosphorelay response regulator activity|nucleus|regulation of transcription, DNA-templated|response to cytokinin|cytokinin-activated signaling pathway|response to chitin|stem cell population maintenance	path:ath04075	Plant hormone signal transduction
AT1G19180	7589.77	13079.4	2100.14	0.160586	-2.63858	5.58e-107	5.21e-105	Down	28.4468	24.8712	25.2822	144.663	194.695	171.077	JAZ1	Araport:AT1G19180,TAIR:AT1G19180,GeneID:838501	JAZ1 is a nuclear-localized protein involved in jasmonate signaling. JAZ1 transcript levels rise in response to a jasmonate stimulus. JAZ1 can interact with the COI1 F-box subunit of an SCF E3 ubiquitin ligase in a yeast-two-hybrid assay only in the presence of jasmonate-isoleucine (JA-ILE) or coronatine. Application of jasmonate methyl ester to Arabidopsis roots reduces the levels of a JAZ1:GUS …	jasmonate-zim-domain protein 1		GO:0005634,GO:0009555,GO:0009611,GO:0009753,GO:0009867,GO:0009908,GO:0031347,GO:0042742,GO:1900067,GO:2000022	nucleus|pollen development|response to wounding|response to jasmonic acid|jasmonic acid mediated signaling pathway|flower development|regulation of defense response|defense response to bacterium|regulation of cellular response to alkaline pH|regulation of jasmonic acid mediated signaling pathway	path:ath04075	Plant hormone signal transduction
AT1G19210	11.6022	23.2045	0	0.00814941	-6.93909	6.74e-07	3.42e-06	Down	0	0	0	0.573112	0.776518	0.468619	T29M8.8	Araport:AT1G19210,TAIR:AT1G19210,GeneID:838504	encodes a member of the DREB subfamily A-5 of ERF/AP2 transcription factor family. The protein contains one AP2 domain. There are 15 members in this subfamily including RAP2.1, RAP2.9 and RAP2.10.	Integrase-type DNA-binding superfamily protein	ERF	GO:0003677,GO:0003700,GO:0005634,GO:0009873	DNA binding|DNA-binding transcription factor activity|nucleus|ethylene-activated signaling pathway
AT1G19250	81.2158	157.273	5.15821	0.0326666	-4.93604	2.05e-24	3.22e-23	Down	0.0709253	0.110866	0	2.10787	1.83961	1.85586	FMO1	Araport:AT1G19250,TAIR:AT1G19250,GeneID:838508	FMO1 is required for full expression of TIR-NB-LRR-conditioned resistance to avirulent pathogens and for basal resistance to invasive virulent pathogens. Functions in an EDS1-regulated but SA-independent mechanism that promotes resistance and cell death at pathogen infection sites.	flavin-dependent monooxygenase 1		GO:0004497,GO:0004499,GO:0009626,GO:0009627,GO:0009870,GO:0010204,GO:0031543,GO:0042742,GO:0050660,GO:0050661,GO:0050832,GO:0051707,GO:0062034,GO:0062047,GO:0071456	monooxygenase activity|N,N-dimethylaniline monooxygenase activity|plant-type hypersensitive response|systemic acquired resistance|defense response signaling pathway, resistance gene-dependent|defense response signaling pathway, resistance gene-independent|peptidyl-proline dioxygenase activity|defense response to bacterium|flavin adenine dinucleotide binding|NADP binding|defense response to fungus…
AT1G19300	1351.55	2414.27	288.832	0.119643	-3.06319	8.01e-117	8.77e-115	Down	3.92751	4.13486	3.52284	28.9138	36.2109	36.0431	PARVUS	Araport:AT1G19300,TAIR:AT1G19300,GeneID:838512	The PARVUS/GLZ1 gene encodes a putative family 8 glycosyl transferase that contributes to xylan biosynthesis. Its gene expression shows good co-variance with the IRX3 gene involved in secondary cell wall synthesis. PARVUS/GLZ1 is predicted to have galacturonosyltransferase activity and may be involved in the formation of the complex oligosaccharide sequence present at the reducing end of xylan. P…	Nucleotide-diphospho-sugar transferases superfamily protein		GO:0005783,GO:0005789,GO:0005794,GO:0010051,GO:0010417,GO:0016021,GO:0032504,GO:0045489,GO:0047262,GO:0048366,GO:0052386	endoplasmic reticulum|endoplasmic reticulum membrane|Golgi apparatus|xylem and phloem pattern formation|glucuronoxylan biosynthetic process|integral component of membrane|multicellular organism reproduction|pectin biosynthetic process|polygalacturonate 4-alpha-galacturonosyltransferase activity|leaf development|cell wall thickening
AT1G19350	3840.82	2439.33	5242.3	2.14877	1.10351	5.28e-25	8.48e-24	Up	45.339	50.2867	49.576	21.24	21.831	27.7719	BES1	Araport:AT1G19350,TAIR:AT1G19350,GeneID:838518	Encodes brassinosteroid (BR) signalling protein that accumulates in the nucleus as dephosphorylated form in response to BRs. Is phosphorylated by the BIN2 GSK3 kinase. It synergistically interacts with BIM1 to bind to E box sequences (CANNTG). The protein contains a nuclear localization signal (NLS), followed by a highly conserved amino-terminal domain (N) shared by all family members, a BIN2 pho…	Brassinosteroid signaling positive regulator (BZR1) family protein	BES1	GO:0003677,GO:0003700,GO:0005634,GO:0005737,GO:0006351,GO:0009742,GO:0071367,GO:1904961	DNA binding|DNA-binding transcription factor activity|nucleus|cytoplasm|transcription, DNA-templated|brassinosteroid mediated signaling pathway|cellular response to brassinosteroid stimulus|quiescent center organization	path:ath04075	Plant hormone signal transduction
AT1G19440	732.541	429.359	1035.72	2.41366	1.27122	7.65e-25	1.22e-23	Up	10.9507	9.9649	11.0862	4.82774	4.62847	4.41488	KCS4	Araport:AT1G19440,TAIR:AT1G19440,GeneID:838528	Encodes KCS4, a member of the 3-ketoacyl-CoA synthase family involved in the biosynthesis of VLCFA (very long chain fatty acids).	3-ketoacyl-CoA synthase 4		GO:0006633,GO:0016021,GO:0102336,GO:0102337,GO:0102338,GO:0102756	fatty acid biosynthetic process|integral component of membrane|3-oxo-arachidoyl-CoA synthase activity|3-oxo-cerotoyl-CoA synthase activity|3-oxo-lignoceronyl-CoA synthase activity|very-long-chain 3-ketoacyl-CoA synthase activity	path:ath00062	Fatty acid elongation
AT1G19510	104.922	34.173	175.671	5.10897	2.35303	4.67e-15	4.61e-14	Up	5.13417	5.94086	6.38752	1.21525	0.776479	1.593	RL5	Araport:AT1G19510,TAIR:AT1G19510,GeneID:838537		RAD-like 5	MYB_related	GO:0003677,GO:0005634	DNA binding|nucleus
AT1G19610	23.0988	3.32898	42.8686	13.1394	3.71582	2.25e-07	1.2e-06	Up	1.2779	1.78825	1.6	0.179851	0.193266	0	PDF1.4	Araport:AT1G19610,TAIR:AT1G19610,GeneID:838548	Predicted to encode a PR (pathogenesis-related) protein. Belongs to the plant defensin (PDF) family with the following members: At1g75830/PDF1.1, At5g44420/PDF1.2a, At2g26020/PDF1.2b, At5g44430/PDF1.2c, At2g26010/PDF1.3, At1g19610/PDF1.4, At1g55010/PDF1.5, At2g02120/PDF2.1, At2g02100/PDF2.2, At2g02130/PDF2.3, At1g61070/PDF2.4, At5g63660/PDF2.5, At2g02140/PDF2.6, At5g38330/PDF3.1 and At4g30070/PDF…	defensin-like protein		GO:0005576,GO:0006952,GO:0031640,GO:0050832	extracellular region|defense response|killing of cells of other organism|defense response to fungus
AT1G19640	111.641	70.1027	153.179	2.18763	1.12937	8.52e-05	0.000316938	Up	1.79788	1.68903	2.73451	0.831946	1.06703	1.07583	JMT	Araport:AT1G19640,TAIR:AT1G19640,GeneID:838551	Encodes a S-adenosyl-L-methionine:jasmonic acid carboxyl methyltransferase that catalyzes the formation of methyljasmonate from jasmonic acid. Its expression is induced in response to wounding or methyljasmonate treatment.	jasmonic acid carboxyl methyltransferase		GO:0005634,GO:0005737,GO:0009611,GO:0009694,GO:0030795,GO:0031408,GO:0102078	nucleus|cytoplasm|response to wounding|jasmonic acid metabolic process|jasmonate O-methyltransferase activity|oxylipin biosynthetic process|methyl jasmonate methylesterase activity	path:ath00592	alpha-Linolenic acid metabolism
AT1G19670	11109.1	19367.8	2850.46	0.14718	-2.76434	7.95e-30	1.52e-28	Down	49.2908	30.42	52.6766	319.476	333.12	286.299	CLH1	Araport:AT1G19670,TAIR:AT1G19670,GeneID:838554	Chlorophyllase is the first enzyme involved in chlorophyll degradation. It catalyzes the hydrolysis of the ester bond to yield chlorophyllide and phytol. AtCLH1 lacks a typical signal sequence for the chloroplast. Its expression is induced rapidly by methyljasmonate, a known promoter of senescence and chlorophyll degradation.	chlorophyllase 1		GO:0005773,GO:0015996,GO:0042742,GO:0047746,GO:0050832,GO:0102293	vacuole|chlorophyll catabolic process|defense response to bacterium|chlorophyllase activity|defense response to fungus|pheophytinase b activity	path:ath00860	Porphyrin and chlorophyll metabolism
AT1G19835	4035.44	2231.46	5839.42	2.61642	1.3876	1.04e-59	4.39e-58	Up	31.005	33.3405	31.329	12.7855	11.8022	13.7269	F14P1.24	Araport:AT1G19835,TAIR:AT1G19835,GeneID:838571		filament-like protein (DUF869)		GO:0005886,GO:0008017,GO:0010090,GO:0046785	plasma membrane|microtubule binding|trichome morphogenesis|microtubule polymerization
AT1G20070	394.72	756.174	33.2656	0.0439435	-4.50821	4.15e-92	3.11e-90	Down	0.629935	0.847027	0.538434	14.4139	17.8554	15.5353	T20H2.15	Araport:AT1G20070,TAIR:AT1G20070,GeneID:838596		hypothetical protein
AT1G20090	3147.36	1097.27	5197.45	4.73453	2.24322	3.86e-112	3.91e-110	Up	80.9005	90.2585	83.9909	20.9229	16.4356	19.1365	ROP2	Araport:AT1G20090,TAIR:AT1G20090,GeneID:838598	Member of the Rho GTPase family. Functions to organize the microtubular cytoskeleton in combination with RIC1 and RIC4. These interactions affect pavement cell morphogenesis and pollen tube growth. ROP2 expression is stimulated by brassinosteroid treatment. Inhibit light-induced stomatal opening.	RHO-related protein from plants 2		GO:0000226,GO:0000902,GO:0003924,GO:0005525,GO:0005634,GO:0005730,GO:0005737,GO:0005886,GO:0007015,GO:0007266,GO:0009416,GO:0009860,GO:0010119,GO:0016477,GO:0019901,GO:0030036,GO:0030838,GO:0031532	microtubule cytoskeleton organization|cell morphogenesis|GTPase activity|GTP binding|nucleus|nucleolus|cytoplasm|plasma membrane|actin filament organization|Rho protein signal transduction|response to light stimulus|pollen tube growth|regulation of stomatal movement|cell migration|protein kinase binding|actin cytoskeleton organization|positive regulation of actin filament polymerization|actin cyt…	path:ath04145,path:ath04933	Phagosome|AGE-RAGE signaling pathway in diabetic complications
AT1G20310	57.6381	113.239	2.0376	0.018118	-5.78644	6.79e-17	7.49e-16	Down	0.0718635	0.037444	0	2.42485	2.33944	1.55922	F14O10.9	Araport:AT1G20310,TAIR:AT1G20310,GeneID:838619		syringolide-induced protein		GO:0005886	plasma membrane
AT1G20330	5664	2223.46	9104.55	4.0958	2.03415	1.26e-125	1.65e-123	Up	116.783	119.138	124.55	29.5871	31.3442	31.1113	SMT2	Araport:AT1G20330,TAIR:AT1G20330,GeneID:838621	Encodes a sterol-C24-methyltransferases involved in sterol biosynthesis. Mutants display altered sterol composition, serrated petals and sepals and altered cotyledon vascular patterning as well as ectopic endoreduplication. This suggests that suppression of endoreduplication is important for petal morphogenesis and that normal sterol composition is required for this suppression.	sterol methyltransferase 2		GO:0005783,GO:0005794,GO:0007389,GO:0008757,GO:0009825,GO:0010051,GO:0016126,GO:0030797,GO:0032876	endoplasmic reticulum|Golgi apparatus|pattern specification process|S-adenosylmethionine-dependent methyltransferase activity|multidimensional cell growth|xylem and phloem pattern formation|sterol biosynthetic process|24-methylenesterol C-methyltransferase activity|negative regulation of DNA endoreduplication	path:ath00100	Steroid biosynthesis
AT1G20350	212.047	336.379	87.7148	0.260405	-1.94117	9.46e-12	7.53e-11	Down	1.71244	3.15344	1.26705	10.3997	6.68039	7.61739	TIM17-1	Araport:AT1G20350,TAIR:AT1G20350,GeneID:838623	mitochondrial inner membrane translocase	translocase inner membrane subunit 17-1		GO:0005744,GO:0030150,GO:0031305	TIM23 mitochondrial import inner membrane translocase complex|protein import into mitochondrial matrix|integral component of mitochondrial inner membrane
AT1G20450	55024.8	83134.2	26915.4	0.323762	-1.627	3.84e-36	9.2e-35	Down	379.992	350.345	388.565	919.333	1351.04	1336.97	ERD10	Araport:AT1G20450,TAIR:AT1G20450,GeneID:838633	Encodes a gene induced by low temperature and dehydration. Inhibits e.coli growth while overexpressed. Belongs to the dehydrin protein family, which contains highly conserved stretches of 7-17 residues that are repetitively scattered in their sequences, the K-, S-, Y- and lysine rich segments. LTI29 and LTI30 double overexpressors confer cold tolerance. Localized to membranes and cytoplasm.	Dehydrin family protein		GO:0001786,GO:0003779,GO:0005507,GO:0005634,GO:0005737,GO:0005829,GO:0009409,GO:0009414,GO:0009506,GO:0009631,GO:0009737,GO:0010029,GO:0016020,GO:0016151,GO:0019898,GO:0031210,GO:0050821,GO:0090559	phosphatidylserine binding|actin binding|copper ion binding|nucleus|cytoplasm|cytosol|response to cold|response to water deprivation|plasmodesma|cold acclimation|response to abscisic acid|regulation of seed germination|membrane|nickel cation binding|extrinsic component of membrane|phosphatidylcholine binding|protein stabilization|regulation of membrane permeability
AT1G20470	37.6521	65.3913	9.91287	0.151525	-2.72238	2.14e-07	1.15e-06	Down	0.222659	0.193358	0.680749	2.55919	2.04291	3.00357	F5M15.19	Araport:AT1G20470,TAIR:AT1G20470,GeneID:838635		SAUR-like auxin-responsive protein family		GO:0005634,GO:0005730,GO:0005886,GO:0007275,GO:0009734,GO:0009926,GO:0040008	nucleus|nucleolus|plasma membrane|multicellular organism development|auxin-activated signaling pathway|auxin polar transport|regulation of growth
AT1G20510	14983.7	25824.6	4142.78	0.160428	-2.64001	1.04e-142	1.75e-140	Down	36.5988	35.0579	33.0161	206.765	252.403	221.612	OPCL1	Araport:AT1G20510,TAIR:AT1G20510,GeneID:838639		OPC-8:0 CoA ligase1		GO:0005524,GO:0005777,GO:0009611,GO:0009695,GO:0016874	ATP binding|peroxisome|response to wounding|jasmonic acid biosynthetic process|ligase activity	path:ath00592	alpha-Linolenic acid metabolism
AT1G20610	35.7187	20.0793	51.3582	2.54028	1.34499	0.00502126	0.0131784	Up	0.517803	0.586517	0.619478	0.221795	0.119169	0.373212	CYCB2;3	Araport:AT1G20610,TAIR:AT1G20610,GeneID:838650		Cyclin B2;3		GO:0000079,GO:0000278,GO:0000307,GO:0005634,GO:0005737,GO:0005813,GO:0006468,GO:0007088,GO:0008284,GO:0016538,GO:0019901,GO:0045787,GO:0051301	regulation of cyclin-dependent protein serine/threonine kinase activity|mitotic cell cycle|cyclin-dependent protein kinase holoenzyme complex|nucleus|cytoplasm|centrosome|protein phosphorylation|regulation of mitotic nuclear division|positive regulation of cell proliferation|cyclin-dependent protein serine/threonine kinase regulator activity|protein kinase binding|positive regulation of cell cycl…
AT1G20780	3342.71	1407.84	5277.57	3.74838	1.90627	8.87e-98	7.34e-96	Up	35.81	35.2952	32.7686	10.4616	9.01306	9.54413	SAUL1	Araport:AT1G20780,TAIR:AT1G20780,GeneID:838668	Encodes a protein containing a U-box and an ARM domain. Homozygous mutant seedlings have a seedling lethal phenotype with widespread cell death lesions throughout the cotyledons and roots.	senescence-associated E3 ubiquitin ligase 1		GO:0004842,GO:0005634,GO:0005737,GO:0005886,GO:0010115,GO:0010150,GO:0010271,GO:0010380,GO:0070696,GO:0090359	ubiquitin-protein transferase activity|nucleus|cytoplasm|plasma membrane|regulation of abscisic acid biosynthetic process|leaf senescence|regulation of chlorophyll catabolic process|regulation of chlorophyll biosynthetic process|transmembrane receptor protein serine/threonine kinase binding|negative regulation of abscisic acid biosynthetic process
AT1G20823	641.536	1121.57	161.499	0.144029	-2.79557	1.08e-54	4.04e-53	Down	4.09536	4.19737	2.54548	25.4716	29.0152	24.0273	F2D10.34	Araport:AT1G20823,TAIR:AT1G20823,GeneID:838674		RING/U-box superfamily protein		GO:0005886,GO:0006952,GO:0009909,GO:0010200,GO:0010966,GO:0016021,GO:0046872,GO:0061630,GO:0070417	plasma membrane|defense response|regulation of flower development|response to chitin|regulation of phosphate transport|integral component of membrane|metal ion binding|ubiquitin protein ligase activity|cellular response to cold
AT1G20870	22.5989	41.7839	3.41388	0.0820322	-3.60767	1.07e-06	5.28e-06	Down	0.0515063	0.0402555	0.0393683	0.279086	0.899708	0.477149	F9H16.15	Araport:AT1G20870,TAIR:AT1G20870,GeneID:838680		HSP20-like chaperones superfamily protein		GO:0005634,GO:1901537	nucleus|positive regulation of DNA demethylation
AT1G20970	4806.11	1802.07	7810.16	4.33501	2.11603	1.99e-90	1.46e-88	Up	34.0561	36.9471	33.0857	7.29588	8.73905	9.07383	F9H16.4	Araport:AT1G20970,TAIR:AT1G20970,GeneID:838691		calponin-like domain protein		GO:0005783,GO:0005886,GO:0010155,GO:0016021	endoplasmic reticulum|plasma membrane|regulation of proton transport|integral component of membrane
AT1G21060	273.427	181.608	365.246	2.00656	1.00473	3.5e-06	1.61e-05	Up	4.50328	4.9442	5.14939	2.37672	1.77361	3.50263	T22I11.12	Araport:AT1G21060,TAIR:AT1G21060,GeneID:838700		Serine/Threonine-kinase, putative (Protein of unknown function, DUF547)
AT1G21070	109.281	155.884	62.6779	0.402219	-1.31395	4.25e-06	1.93e-05	Down	0.805218	0.933844	0.688256	2.5078	2.18613	1.60841	T22I11.10	Araport:AT1G21070,TAIR:AT1G21070,GeneID:838703		Nucleotide-sugar transporter family protein		GO:0000139,GO:0005794,GO:0008643,GO:0015297,GO:0016021,GO:0022857,GO:0048354	Golgi membrane|Golgi apparatus|carbohydrate transport|antiporter activity|integral component of membrane|transmembrane transporter activity|mucilage biosynthetic process involved in seed coat development
AT1G21100	533.937	123.82	944.055	7.62487	2.93071	8.76e-47	2.73e-45	Up	15.106	16.8411	9.30259	1.73216	1.84584	2.086	IGMT1	Araport:AT1G21100,TAIR:AT1G21100,GeneID:838706		O-methyltransferase family protein		GO:0005829,GO:0008168,GO:0008171,GO:0008757,GO:0019438,GO:0042343,GO:0046983	cytosol|methyltransferase activity|O-methyltransferase activity|S-adenosylmethionine-dependent methyltransferase activity|aromatic compound biosynthetic process|indole glucosinolate metabolic process|protein dimerization activity
AT1G21130	36127.2	22938	49316.5	2.15003	1.10436	4.49e-38	1.13e-36	Up	601.413	639.356	576.418	274.581	298.712	310.741	IGMT4	Araport:AT1G21130,TAIR:AT1G21130,GeneID:838709		O-methyltransferase family protein		GO:0005829,GO:0008171,GO:0008757,GO:0019438,GO:0046983	cytosol|O-methyltransferase activity|S-adenosylmethionine-dependent methyltransferase activity|aromatic compound biosynthetic process|protein dimerization activity
AT1G21240	759.718	1344.47	174.968	0.130092	-2.9424	2.11e-96	1.67e-94	Down	1.67301	1.87004	1.33352	13.5356	12.4475	13.2519	WAK3	Araport:AT1G21240,TAIR:AT1G21240,GeneID:838719	encodes a wall-associated kinase	wall associated kinase 3
AT1G21245	5.97134	11.2587	0.683985	0.0607696	-4.04051	0.00503364	0.013204	Down	0	0	0.0920951	0.44514	0.526177	0.61685	AT1G21245	Araport:AT1G21245,TAIR:AT1G21245,GeneID:838720		Protein kinase superfamily protein
AT1G21310	2452.55	3902.31	1002.78	0.25697	-1.96033	0.00221021	0.00629234	Down	16.1771	20.5091	4.24016	43.1873	57.2754	66.1699	EXT3	Araport:AT1G21310,TAIR:AT1G21310,GeneID:838728	Encodes extensin 3.	extensin 3		GO:0005199,GO:0005576,GO:0009530,GO:0009664	structural constituent of cell wall|extracellular region|primary cell wall|plant-type cell wall organization
AT1G21313	32.0212	64.0425	0	0.00294761	-8.40624	0.00178722	0.00519322	Down	0	0	0	8.77285	0.0992338	0.639838	AT1G21313	Araport:AT1G21313,GeneID:28717257		transmembrane protein
AT1G21390	256.333	342.151	170.515	0.497849	-1.00622	2.5e-07	1.33e-06	Down	2.83175	3.18064	2.6094	5.76331	5.00841	7.40775	emb2170	Araport:AT1G21390,TAIR:AT1G21390,GeneID:838738		embryo defective 2170
AT1G21400	1538.18	2091.85	984.503	0.470596	-1.08744	2.72e-22	3.91e-21	Down	8.097	6.80819	7.17149	17.7316	14.1752	17.2944	F24J8.4	Araport:AT1G21400,TAIR:AT1G21400,GeneID:838739		Thiamin diphosphate-binding fold (THDP-binding) superfamily protein		GO:0003826,GO:0003863,GO:0005947,GO:0009083,GO:0009646,GO:0009744,GO:0043617,GO:0046872	alpha-ketoacid dehydrogenase activity|3-methyl-2-oxobutanoate dehydrogenase (2-methylpropanoyl-transferring) activity|mitochondrial alpha-ketoglutarate dehydrogenase complex|branched-chain amino acid catabolic process|response to absence of light|response to sucrose|cellular response to sucrose starvation|metal ion binding	path:ath00280,path:ath00640	Valine, leucine and isoleucine degradation|Propanoate metabolism
AT1G21550	824.698	1329.22	320.176	0.240912	-2.05342	3.25e-53	1.16e-51	Down	7.89663	7.87119	6.0882	30.8027	31.9614	32.1184	F24J8.15	Araport:AT1G21550,TAIR:AT1G21550,GeneID:838756		Calcium-binding EF-hand family protein		GO:0005509	calcium ion binding	path:ath04626	Plant-pathogen interaction
AT1G21590	4217.28	5688.74	2745.81	0.482649	-1.05095	1.16e-39	3.04e-38	Down	19.8712	20.2065	20.4772	45.2515	40.8994	45.2666	F24J8.18	Araport:AT1G21590,TAIR:AT1G21590,GeneID:838760		kinase with adenine nucleotide alpha hydrolases-like domain-containing protein
AT1G21730	1069.68	656.958	1482.4	2.25774	1.17488	3.64e-21	4.96e-20	Up	9.25259	10.3196	10.3683	4.05725	4.92637	4.88121	F8K7.17	Araport:AT1G21730,TAIR:AT1G21730,GeneID:838777		P-loop containing nucleoside triphosphate hydrolases superfamily protein		GO:0003777,GO:0005524,GO:0005739,GO:0005871,GO:0005874,GO:0005886,GO:0007018,GO:0008017,GO:0016887	microtubule motor activity|ATP binding|mitochondrion|kinesin complex|microtubule|plasma membrane|microtubule-based movement|microtubule binding|ATPase activity
AT1G21830	372.014	161.969	582.059	3.5949	1.84595	1.52e-25	2.49e-24	Up	9.88962	11.0639	9.1079	2.37178	2.97041	3.41165	AT1G21820	Araport:AT1G21830,TAIR:AT1G21830,GeneID:838785		hypothetical protein
AT1G21910	1764.65	156.839	3372.46	21.5414	4.42904	2.47e-38	6.27e-37	Up	58.0667	51.6959	52.2971	2.03174	3.80369	1.96392	DREB26	Araport:AT1G21910,TAIR:AT1G21910,GeneID:838793	encodes a member of the DREB subfamily A-5 of ERF/AP2 transcription factor family. The protein contains one AP2 domain. There are 15 members in this subfamily including RAP2.1, RAP2.9 and RAP2.10.	Integrase-type DNA-binding superfamily protein	ERF	GO:0003700,GO:0005634,GO:0009751,GO:0009753,GO:0009873,GO:0034605,GO:0043565,GO:0044212,GO:0045893,GO:0071497	DNA-binding transcription factor activity|nucleus|response to salicylic acid|response to jasmonic acid|ethylene-activated signaling pathway|cellular response to heat|sequence-specific DNA binding|transcription regulatory region DNA binding|positive regulation of transcription, DNA-templated|cellular response to freezing
AT1G21920	1387.07	509.354	2264.78	4.44359	2.15173	1.29e-92	9.72e-91	Up	26.1571	24.0969	26.1958	6.15522	5.39212	6.47884	T26F17.15	Araport:AT1G21920,TAIR:AT1G21920,GeneID:838794		Histone H3 K4-specific methyltransferase SET7/9 family protein
AT1G22110	40.8037	11.5596	70.0477	6.06115	2.59959	2.66e-06	1.24e-05	Up	0.913857	0.406719	0.669394	0.0281348	0.120933	0.194938	F2E2.18	Araport:AT1G22110,TAIR:AT1G22110,GeneID:838816		structural constituent of ribosome
AT1G22190	3691.64	1632.07	5751.22	3.52596	1.81802	1.37e-54	5.08e-53	Up	84.8575	76.9305	76.2818	21.6725	26.9918	21.7496	F16L1.8	Araport:AT1G22190,TAIR:AT1G22190,GeneID:838824	The gene encodes a putative transcription factor belongings to the abiotic stress-associated DREB A-6 clade.	Integrase-type DNA-binding superfamily protein	ERF	GO:0003700,GO:0005634,GO:0006970,GO:0009409,GO:0009414,GO:0009873,GO:0043565	DNA-binding transcription factor activity|nucleus|response to osmotic stress|response to cold|response to water deprivation|ethylene-activated signaling pathway|sequence-specific DNA binding
AT1G22230	23.6136	11.1426	36.0846	3.22562	1.68958	0.00333053	0.00910067	Up	0.505218	0.849162	0.398615	0.240837	0.138027	0.190708	F16L1.4	Araport:AT1G22230,TAIR:AT1G22230,GeneID:838828		nucleolar GTP-binding protein
AT1G22330	751.24	147.916	1354.56	9.14363	3.19277	2.19e-101	1.9e-99	Up	17.4595	21.2445	20.7014	2.0722	2.02433	2.71089	T16E15.6	Araport:AT1G22330,TAIR:AT1G22330,GeneID:838839		RNA-binding (RRM/RBD/RNP motifs) family protein		GO:0003729,GO:0005634,GO:0009414,GO:0009651,GO:0009737,GO:0010029	mRNA binding|nucleus|response to water deprivation|response to salt stress|response to abscisic acid|regulation of seed germination
AT1G22360	3175.49	1790	4560.97	2.54834	1.34956	9.95e-46	2.99e-44	Up	56.1785	48.2854	54.1862	22.9679	21.0264	21.1532	UGT85A2	Araport:AT1G22360,TAIR:AT1G22360,GeneID:838843		UDP-glucosyl transferase 85A2		GO:0008194,GO:0015020,GO:0043231	UDP-glycosyltransferase activity|glucuronosyltransferase activity|intracellular membrane-bounded organelle
AT1G22370	3441.7	1888.11	4995.29	2.64551	1.40355	6.98e-41	1.9e-39	Up	48.0791	40.047	51.1805	18.4418	17.115	19.6035	UGT85A5	Araport:AT1G22370,TAIR:AT1G22370,GeneID:838844		UDP-glucosyl transferase 85A5		GO:0008194,GO:0015020,GO:0043231	UDP-glycosyltransferase activity|glucuronosyltransferase activity|intracellular membrane-bounded organelle
AT1G22380	49.8232	20.17	79.4765	3.9337	1.97589	2.83e-06	1.32e-05	Up	0.798645	0.99598	1.3076	0.399854	0.221769	0.204275	UGT85A3	Araport:AT1G22380,TAIR:AT1G22380,GeneID:838845	Encodes a putative UDP-glucosyl transferase. At1g22380 was initially identified as encoding the protein AAF87154, which has been classified as a bHLH protein (AtbHLH152). Subsequently it has been found that the AAF87154 protein appears to be encoded by the AT1G23970 genomic locus.	UDP-glucosyl transferase 85A3		GO:0008194,GO:0015020,GO:0043231	UDP-glycosyltransferase activity|glucuronosyltransferase activity|intracellular membrane-bounded organelle
AT1G22410	3433.8	4637.67	2229.93	0.480911	-1.05616	1.07e-20	1.43e-19	Down	24.1511	24.5564	22.2005	45.4434	57.3217	51.1049	F12K8.24	Araport:AT1G22410,TAIR:AT1G22410,GeneID:838847		Class-II DAHP synthetase family protein		GO:0003849,GO:0009073,GO:0009423,GO:0009507	3-deoxy-7-phosphoheptulonate synthase activity|aromatic amino acid family biosynthetic process|chorismate biosynthetic process|chloroplast	path:ath00400	Phenylalanine, tyrosine and tryptophan biosynthesis
AT1G22530	16926.2	3501.02	30351.4	8.66992	3.11602	1.23e-302	1.24e-299	Up	258.095	257.604	266.933	29.1504	31.2423	34.0813	PATL2	Araport:AT1G22530,TAIR:AT1G22530,GeneID:838859		PATELLIN 2		GO:0002020,GO:0005794,GO:0005886,GO:0007049,GO:0008289,GO:0009507,GO:0051301	protease binding|Golgi apparatus|plasma membrane|cell cycle|lipid binding|chloroplast|cell division
AT1G22550	415.431	231.01	599.852	2.59963	1.37831	7.15e-17	7.88e-16	Up	7.07188	5.86404	7.90762	2.75469	2.94783	2.6812	F12K8.11	Araport:AT1G22550,TAIR:AT1G22550,GeneID:838861		Major facilitator superfamily protein		GO:0009705,GO:0015333,GO:0015706,GO:0016021,GO:0035673,GO:0080054,GO:1904680	plant-type vacuole membrane|peptide:proton symporter activity|nitrate transport|integral component of membrane|oligopeptide transmembrane transporter activity|low-affinity nitrate transmembrane transporter activity|peptide transmembrane transporter activity
AT1G22690	1333.01	482.636	2183.39	4.52174	2.17688	2.07e-58	8.32e-57	Up	58.3999	62.1855	72.3197	12.9898	13.6763	18.0583	T22J18.14	Araport:AT1G22690,TAIR:AT1G22690,GeneID:838875		Gibberellin-regulated family protein		GO:0005576,GO:0009740	extracellular region|gibberellic acid mediated signaling pathway
AT1G22740	3177.97	808.531	5547.42	6.85933	2.77807	1.09e-199	3.28e-197	Up	110.278	122.56	120.752	18.2792	16.7687	18.9477	RABG3B	Araport:AT1G22740,TAIR:AT1G22740,GeneID:838880	GTP-binding protein Rab7	RAB GTPase homolog G3B		GO:0003924,GO:0005525,GO:0005773,GO:0005774,GO:0005886,GO:0006886,GO:0010089,GO:0010508,GO:0010623,GO:0032482,GO:1905177	GTPase activity|GTP binding|vacuole|vacuolar membrane|plasma membrane|intracellular protein transport|xylem development|positive regulation of autophagy|programmed cell death involved in cell development|Rab protein signal transduction|tracheary element differentiation	path:ath04144,path:ath04145	Endocytosis|Phagosome
AT1G22810	8.573	17.146	0	0.0110372	-6.50148	1.13e-05	4.83e-05	Down	0	0	0	0.497432	0.712713	0.273537	T22J18.2	Araport:AT1G22810,TAIR:AT1G22810,GeneID:838887	encodes a member of the DREB subfamily A-5 of ERF/AP2 transcription factor family. The protein contains one AP2 domain. There are 16 members in this subfamily including RAP2.1, RAP2.9 and RAP2.10.	Integrase-type DNA-binding superfamily protein	ERF	GO:0003677,GO:0003700,GO:0005634,GO:0005737,GO:0009873,GO:0042631	DNA binding|DNA-binding transcription factor activity|nucleus|cytoplasm|ethylene-activated signaling pathway|cellular response to water deprivation
AT1G22882	3954.99	1321.78	6588.19	4.98327	2.31709	1.36e-159	2.73e-157	Up	54.0544	52.8897	51.6172	10.8606	10.3378	12.135	AtSUN3	Araport:AT1G22882,TAIR:AT1G22882,GeneID:838894	Encodes a member of the mid-SUN subfamily of SUN-domain proteins that is localized to both the nuclear envelope and the ER. It is involved in early seed development and nuclear morphology.	Galactose-binding protein		GO:0005635,GO:0005737,GO:0005783,GO:0005789,GO:0016020,GO:0016021,GO:0031965,GO:0034975,GO:0043621	nuclear envelope|cytoplasm|endoplasmic reticulum|endoplasmic reticulum membrane|membrane|integral component of membrane|nuclear membrane|protein folding in endoplasmic reticulum|protein self-association
AT1G22885	527.103	273.022	781.184	2.85636	1.51418	5.49e-17	6.11e-16	Up	19.1567	27.8055	22.3119	8.73305	6.42425	10.3265	AT1G22885	Araport:AT1G22885,TAIR:AT1G22885,GeneID:838895		transmembrane protein
AT1G22890	759.846	199.163	1320.53	6.62464	2.72784	7.96e-49	2.58e-47	Up	37.5357	56.1134	32.7559	6.38994	5.91476	7.70256	F19G10.22	Araport:AT1G22890,TAIR:AT1G22890,GeneID:838896		transmembrane protein
AT1G22900	127.159	82.8709	171.447	2.06195	1.04401	0.00051363	0.00167	Up	2.80116	4.98374	3.85271	2.13143	1.2537	2.55388	F19G10.14	Araport:AT1G22900,TAIR:AT1G22900,GeneID:838897		Disease resistance-responsive (dirigent-like protein) family protein		GO:0048046	apoplast
AT1G23030	2024.06	459.059	3589.06	7.8107	2.96545	9.38e-193	2.68e-190	Up	33.1194	33.1892	33.6859	4.84135	3.91668	4.6554	F19G10.3	Araport:AT1G23030,TAIR:AT1G23030,GeneID:838911		ARM repeat superfamily protein		GO:0004842,GO:0005634,GO:0005737,GO:0010200,GO:0016567,GO:0051865	ubiquitin-protein transferase activity|nucleus|cytoplasm|response to chitin|protein ubiquitination|protein autoubiquitination
AT1G23050	136.824	25.8416	247.805	9.48198	3.24519	1.27e-19	1.63e-18	Up	6.61275	7.11981	6.54344	0.540643	0.290484	1.41811	F19G10.1	Araport:AT1G23050,TAIR:AT1G23050,GeneID:838913		hydroxyproline-rich glycoprotein family protein
AT1G23090	500.323	246.548	754.097	3.05307	1.61026	1.69e-26	2.89e-25	Up	6.22728	6.05089	6.64651	2.38767	1.71051	2.40439	AST91	Araport:AT1G23090,TAIR:AT1G23090,GeneID:838917	Encodes AST91 mRNA for sulfate transporter.	sulfate transporter 91		GO:0008271,GO:0015116,GO:0015293,GO:0015301,GO:0016021	secondary active sulfate transmembrane transporter activity|sulfate transmembrane transporter activity|symporter activity|anion:anion antiporter activity|integral component of membrane
AT1G23100	58.7461	85.7347	31.7575	0.371148	-1.42993	6.4e-05	0.000242777	Down	1.42561	1.12546	1.54092	3.70273	4.43626	3.37014	T26J12.12	Araport:AT1G23100,TAIR:AT1G23100,GeneID:838918		GroES-like family protein		GO:0005507,GO:0005524,GO:0005739,GO:0005759,GO:0009408,GO:0046872,GO:0051082,GO:0051085,GO:0051087	copper ion binding|ATP binding|mitochondrion|mitochondrial matrix|response to heat|metal ion binding|unfolded protein binding|chaperone cofactor-dependent protein refolding|chaperone binding
AT1G23390	11218.5	1791.89	20645.1	11.5229	3.52643	1.72e-19	2.19e-18	Up	236.413	228.102	249.478	20.2336	31.0243	12.8466	F26F24.26	Araport:AT1G23390,TAIR:AT1G23390,GeneID:838947		Kelch repeat-containing F-box family protein		GO:0005634,GO:0005829,GO:0043161	nucleus|cytosol|proteasome-mediated ubiquitin-dependent protein catabolic process
AT1G23410	8.72457	16.7485	0.700605	0.0410284	-4.60723	0.000595995	0.00191475	Down	0	0.0533101	0	0.352792	0.29787	0.6984	F26F24.28	Araport:AT1G23410,TAIR:AT1G23410,GeneID:838949		Ribosomal protein S27a / Ubiquitin family protein		GO:0003735,GO:0005634,GO:0005737,GO:0005794,GO:0005886,GO:0006412,GO:0009506,GO:0016567,GO:0019941,GO:0022627,GO:0031386,GO:0031625,GO:0046872	structural constituent of ribosome|nucleus|cytoplasm|Golgi apparatus|plasma membrane|translation|plasmodesma|protein ubiquitination|modification-dependent protein catabolic process|cytosolic small ribosomal subunit|protein tag|ubiquitin protein ligase binding|metal ion binding	path:ath03010	Ribosome
AT1G23480	2314.66	395.673	4233.64	10.6861	3.41766	9.6e-178	2.43e-175	Up	33.3451	31.0944	39.0008	3.57567	2.82757	3.74698	CSLA03	Araport:AT1G23480,TAIR:AT1G23480,GeneID:838956	encodes a gene similar to cellulose synthase	cellulose synthase-like A3		GO:0000139,GO:0016021,GO:0047259,GO:0071555	Golgi membrane|integral component of membrane|glucomannan 4-beta-mannosyltransferase activity|cell wall organization
AT1G23790	8.58625	3.16668	14.0058	4.39429	2.13563	0.0187817	0.0423231	Up	0.193375	0.16373	0.147805	0.0476274	0.0255899	0.0471424	F5O8.34	Araport:AT1G23790,TAIR:AT1G23790,GeneID:838990		dicer-like protein (DUF936)
AT1G23840	455.248	216.779	693.718	3.20506	1.68035	3.28e-23	4.88e-22	Up	12.6287	14.1842	10.8302	4.24876	4.50788	3.51345	F5O8.40	Araport:AT1G23840,TAIR:AT1G23840,GeneID:838995		transmembrane protein
AT1G23870	765.26	89.9623	1440.56	16.0618	4.00556	1.22e-142	2.05e-140	Up	10.538	12.2749	9.89372	0.735132	0.765782	0.631122	TPS9	Araport:AT1G23870,TAIR:AT1G23870,GeneID:838998	Encodes an enzyme putatively involved in trehalose biosynthesis. The protein has a trehalose synthase (TPS)-like domain that may or may not be active as well as a trehalose phosphatase (TPP)-like domain.	trehalose-phosphatase/synthase 9		GO:0005737,GO:0005992,GO:0016311,GO:0016757,GO:0070413	cytoplasm|trehalose biosynthetic process|dephosphorylation|transferase activity, transferring glycosyl groups|trehalose metabolism in response to stress	path:ath00500	Starch and sucrose metabolism
AT1G24070	273.728	165.114	382.343	2.31812	1.21296	4.37e-06	1.98e-05	Up	3.78586	1.80972	4.30955	1.5227	1.61789	1.32091	CSLA10	Araport:AT1G24070,TAIR:AT1G24070,GeneID:839019	encodes a gene similar to cellulose synthase	cellulose synthase-like A10		GO:0000139,GO:0016021,GO:0047259,GO:0071555	Golgi membrane|integral component of membrane|glucomannan 4-beta-mannosyltransferase activity|cell wall organization
AT1G24100	4164.41	6467.05	1861.78	0.287923	-1.79624	7.86e-59	3.21e-57	Down	26.385	25.5779	23.1664	79.9949	99.5842	92.8498	UGT74B1	Araport:AT1G24100,TAIR:AT1G24100,GeneID:839022	Encodes a UDP-glucose:thiohydroximate S-glucosyltransferase, involved in glucosinolate biosynthesis	UDP-glucosyl transferase 74B1		GO:0008194,GO:0019761,GO:0042742,GO:0043231,GO:0047251,GO:0052544,GO:0080043,GO:0080044,GO:0102659,GO:0103099,GO:0103100,GO:0103101,GO:0103102,GO:0103103	UDP-glycosyltransferase activity|glucosinolate biosynthetic process|defense response to bacterium|intracellular membrane-bounded organelle|thiohydroximate beta-D-glucosyltransferase activity|defense response by callose deposition in cell wall|quercetin 3-O-glucosyltransferase activity|quercetin 7-O-glucosyltransferase activity|UDP-glucose: 4-methylthiobutylhydroximate S-glucosyltransferase activi…	path:ath00380,path:ath00966	Tryptophan metabolism|Glucosinolate biosynthesis
AT1G24140	902.195	1570.76	233.63	0.148778	-2.74877	1.07e-63	4.93e-62	Down	3.34093	3.32268	2.18788	19.7109	23.0505	19.312	F3I6.6	Araport:AT1G24140,TAIR:AT1G24140,GeneID:839026		Matrixin family protein		GO:0004222,GO:0005886,GO:0008270,GO:0031012,GO:0031225	metalloendopeptidase activity|plasma membrane|zinc ion binding|extracellular matrix|anchored component of membrane
AT1G24145	664.588	897.521	431.656	0.480886	-1.05623	3.55e-11	2.72e-10	Down	9.88438	10.7142	7.80237	17.476	20.0642	24.312	AT1G24145	Araport:AT1G24145,TAIR:AT1G24145,GeneID:839027		transmembrane protein
AT1G24170	3799.74	2332.88	5266.6	2.25798	1.17503	9.65e-32	1.97e-30	Up	66.0042	62.9229	63.0559	32.5732	29.7362	26.5799	LGT9	Araport:AT1G24170,TAIR:AT1G24170,GeneID:839030	Encodes a protein with putative galacturonosyltransferase activity.	Nucleotide-diphospho-sugar transferases superfamily protein		GO:0000139,GO:0005794,GO:0016021,GO:0045489,GO:0047262,GO:0071555	Golgi membrane|Golgi apparatus|integral component of membrane|pectin biosynthetic process|polygalacturonate 4-alpha-galacturonosyltransferase activity|cell wall organization
AT1G24280	460.421	304.89	615.952	2.0242	1.01735	2.13e-07	1.14e-06	Up	6.5683	5.50865	7.2294	3.08535	4.23893	2.60302	G6PD3	Araport:AT1G24280,TAIR:AT1G24280,GeneID:839044	Encodes a plastidic glucose-6-phosphate dehydrogenase that is sensitive to reduction by DTT and whose mRNA is most highly expressed in root.	glucose-6-phosphate dehydrogenase 3		GO:0004345,GO:0006006,GO:0009051,GO:0009507,GO:0050661	glucose-6-phosphate dehydrogenase activity|glucose metabolic process|pentose-phosphate shunt, oxidative branch|chloroplast|NADP binding	path:ath00030,path:ath00480	Pentose phosphate pathway|Glutathione metabolism
AT1G24330	548.711	945.495	151.928	0.160816	-2.63652	7.78e-65	3.66e-63	Down	1.27634	0.978722	1.38255	8.0586	7.88634	7.72605	F3I6.27	Araport:AT1G24330,TAIR:AT1G24330,GeneID:839049		ARM repeat superfamily protein		GO:0004842,GO:0005634,GO:0005737,GO:0009507	ubiquitin-protein transferase activity|nucleus|cytoplasm|chloroplast
AT1G24440	572.225	271.15	873.299	3.2176	1.68599	4.34e-24	6.7e-23	Up	11.3896	10.8181	11.4624	4.77617	2.94259	3.25254	F21J9.10	Araport:AT1G24440,TAIR:AT1G24440,GeneID:839060		RING/U-box superfamily protein		GO:0004842,GO:0005829,GO:0006511,GO:0009651,GO:0009737,GO:0009789,GO:0046872,GO:0061630	ubiquitin-protein transferase activity|cytosol|ubiquitin-dependent protein catabolic process|response to salt stress|response to abscisic acid|positive regulation of abscisic acid-activated signaling pathway|metal ion binding|ubiquitin protein ligase activity
AT1G24470	45.6432	65.6727	25.6137	0.390289	-1.35739	0.000668986	0.00212839	Down	0.466935	0.369806	0.59007	1.45365	1.22593	1.14743	KCR2	Araport:AT1G24470,TAIR:AT1G24470,GeneID:839063	Encodes one of the two Arabidopsis homologues to YBR159w encoding a S. cerevisiae beta-ketoacyl reductase (KCR), which catalyzes the first reduction during VLCFA (very long chain fatty acids, >18 carbon) elongation: KCR1 (At1g67730), KCR2 (At1g24470). Complementation of the yeast ybr159Delta mutant demonstrated that the two KCR proteins are divergent and that only AtKCR1 can restore heterologous …	beta-ketoacyl reductase 2		GO:0005783,GO:0005789,GO:0016021,GO:0045703	endoplasmic reticulum|endoplasmic reticulum membrane|integral component of membrane|ketoreductase activity
AT1G24530	349.794	185.68	513.908	2.77109	1.47046	1.18e-19	1.51e-18	Up	7.8977	7.46449	8.0955	2.63879	3.12727	3.08952	F21J9.19	Araport:AT1G24530,TAIR:AT1G24530,GeneID:839068		Transducin/WD40 repeat-like superfamily protein		GO:0005634,GO:0005737,GO:0009846	nucleus|cytoplasm|pollen germination
AT1G24580	6.81733	12.6004	1.03429	0.0817329	-3.61294	0.00445115	0.0118215	Down	0	0.0266852	0.0521942	0.504559	0.325316	0.174797	AT1G24580	Araport:AT1G24580,TAIR:AT1G24580,GeneID:2745762		RING/U-box superfamily protein		GO:0006970,GO:0009651,GO:0009687,GO:0009688,GO:0009739,GO:0010200,GO:0016021,GO:0016567,GO:0016740,GO:0046872	response to osmotic stress|response to salt stress|abscisic acid metabolic process|abscisic acid biosynthetic process|response to gibberellin|response to chitin|integral component of membrane|protein ubiquitination|transferase activity|metal ion binding
AT1G24793	35.8055	1.83509	69.7759	37.723	5.23737	0.0132584	0.0312285	Up	0.0331921	0.0518835	3.36576	0.0327002	0	0.0647344	LpxC1	Araport:AT1G24793,TAIR:AT1G24793,GeneID:839084		UDP-3-O-acyl N-acetylglycosamine deacetylase family protein		GO:0005739,GO:0008759,GO:0009245,GO:0046872,GO:0103117,GO:2001289	mitochondrion|UDP-3-O-[3-hydroxymyristoyl] N-acetylglucosamine deacetylase activity|lipid A biosynthetic process|metal ion binding|UDP-3-O-acyl-N-acetylglucosamine deacetylase activity|lipid X metabolic process
AT1G25054	245.805	105.355	386.254	3.66328	1.87314	0.0148367	0.0344766	Up	3.11789	8.90142	9.21289	1.74486	0.683597	3.74204	LpxC3	Araport:AT1G25054,TAIR:AT1G25054,GeneID:839094		UDP-3-O-acyl N-acetylglycosamine deacetylase family protein		GO:0005739,GO:0008759,GO:0009245,GO:0046872,GO:0103117,GO:2001289	mitochondrion|UDP-3-O-[3-hydroxymyristoyl] N-acetylglucosamine deacetylase activity|lipid A biosynthetic process|metal ion binding|UDP-3-O-acyl-N-acetylglucosamine deacetylase activity|lipid X metabolic process
AT1G25220	1658.64	2487.32	829.969	0.333722	-1.58328	1.09e-55	4.17e-54	Down	12.3681	11.9279	10.8122	37.6443	36.0525	36.3758	ASB1	Araport:AT1G25220,TAIR:AT1G25220,GeneID:839103	Catalyzes the first step of tryptophan biosynthesis: Chorismate L-Glutamine %3D Anthranilate Pyruvate L-Glutamate. Functions as a heterocomplex with anthranilate synthase alpha subunit (ASA1 or ASA2).	anthranilate synthase beta subunit 1		GO:0000162,GO:0004049,GO:0005950,GO:0006541,GO:0009507,GO:0010600	tryptophan biosynthetic process|anthranilate synthase activity|anthranilate synthase complex|glutamine metabolic process|chloroplast|regulation of auxin biosynthetic process	path:ath00400	Phenylalanine, tyrosine and tryptophan biosynthesis
AT1G25230	1231.06	310.643	2151.47	6.92166	2.79112	2.72e-136	4.12e-134	Up	30.6336	32.3145	33.4865	5.27181	4.42381	4.89565	F4F7.38	Araport:AT1G25230,TAIR:AT1G25230,GeneID:839105		Calcineurin-like metallo-phosphoesterase superfamily protein		GO:0003993,GO:0005576,GO:0008198,GO:0008199	acid phosphatase activity|extracellular region|ferrous iron binding|ferric iron binding	path:ath00740	Riboflavin metabolism
AT1G25250	249.52	373.859	125.182	0.33511	-1.57729	4.46e-15	4.42e-14	Down	1.33978	1.31799	1.34356	3.4107	4.70902	4.34799	IDD16	Araport:AT1G25250,TAIR:AT1G25250,GeneID:839108		indeterminate(ID)-domain 16	C2H2	GO:0003677,GO:0003700,GO:0005634,GO:0006355,GO:0009630,GO:0009965,GO:0010601,GO:0046872,GO:0048444,GO:2000012	DNA binding|DNA-binding transcription factor activity|nucleus|regulation of transcription, DNA-templated|gravitropism|leaf morphogenesis|positive regulation of auxin biosynthetic process|metal ion binding|floral organ morphogenesis|regulation of auxin polar transport
AT1G25370	522.682	750.003	295.361	0.393979	-1.34381	3.01e-16	3.2e-15	Down	4.92991	4.55212	4.261	9.72906	13.0147	13.7223	F4F7.1	Araport:AT1G25370,TAIR:AT1G25370,GeneID:839122		hypothetical protein (DUF1639)
AT1G25422	243.735	413.078	74.3925	0.180341	-2.4712	3.93e-32	8.13e-31	Down	1.66087	1.19658	1.69262	9.13069	9.26906	7.97798	AT1G25422	Araport:AT1G25422,TAIR:AT1G25422,GeneID:7922317		hypothetical protein
AT1G25450	276.547	136.92	416.174	3.04041	1.60427	1.99e-13	1.79e-12	Up	3.4354	4.67979	5.24614	1.18828	1.58474	1.82728	KCS5	Araport:AT1G25450,TAIR:AT1G25450,GeneID:839131	Encodes KCS5, a member of the 3-ketoacyl-CoA synthase family involved in the biosynthesis of VLCFA (very long chain fatty acids).	3-ketoacyl-CoA synthase 5		GO:0005783,GO:0006633,GO:0009409,GO:0009416,GO:0009922,GO:0016020,GO:0016021,GO:0048868,GO:0102336,GO:0102337,GO:0102338,GO:0102756	endoplasmic reticulum|fatty acid biosynthetic process|response to cold|response to light stimulus|fatty acid elongase activity|membrane|integral component of membrane|pollen tube development|3-oxo-arachidoyl-CoA synthase activity|3-oxo-cerotoyl-CoA synthase activity|3-oxo-lignoceronyl-CoA synthase activity|very-long-chain 3-ketoacyl-CoA synthase activity	path:ath00062	Fatty acid elongation
AT1G25500	952.146	1510.85	393.44	0.260425	-1.94106	3.55e-46	1.09e-44	Down	4.21758	3.85351	3.65654	18.5994	14.3049	14.2582	F2J7.7	Araport:AT1G25500,TAIR:AT1G25500,GeneID:839136		Plasma-membrane choline transporter family protein		GO:0005886,GO:0016021	plasma membrane|integral component of membrane
AT1G25550	3595.65	1528.78	5662.52	3.70619	1.88994	2.81e-61	1.22e-59	Up	71.3298	72.1968	68.7227	17.757	22.8206	19.1696	AT1G25550	Araport:AT1G25550,TAIR:AT1G25550,GeneID:839142		myb-like transcription factor family protein	G2-like	GO:0003677,GO:0003700,GO:0005634,GO:0006355	DNA binding|DNA-binding transcription factor activity|nucleus|regulation of transcription, DNA-templated
AT1G25560	4215.32	2062.01	6368.63	3.0885	1.62691	2.37e-48	7.6e-47	Up	82.7364	77.6623	84.0298	32.8374	25.4364	24.5843	TEM1	Araport:AT1G25560,TAIR:AT1G25560,GeneID:839143	Encodes a member of the RAV transcription factor family that contains AP2 and B3 binding domains. Involved in the regulation of flowering under long days. Loss of function results in early flowering. Overexpression causes late flowering and repression of expression of FT. Novel transcriptional regulator involved in ethylene signaling. Promoter bound by EIN3. EDF1 in turn, binds to promoter elemen…	AP2/B3 transcription factor family protein	RAV	GO:0003677,GO:0003700,GO:0005634,GO:0009873,GO:0048573	DNA binding|DNA-binding transcription factor activity|nucleus|ethylene-activated signaling pathway|photoperiodism, flowering
AT1G26210	666.194	195.343	1137.04	5.80642	2.53765	2.63e-54	9.63e-53	Up	23.5864	21.787	26.1659	4.05293	3.30551	5.57518	SOFL1	Araport:AT1G26210,TAIR:AT1G26210,GeneID:839162	AtSOFL1 acts redundantly with AtSOFL2 as positive regulator of cytokinin levels.	SOB five-like 1
AT1G26390	144.828	250.572	39.0831	0.155959	-2.68076	0.0126913	0.0300321	Down	0.666171	0.801009	0.0261119	3.1679	2.78032	4.11006	T1K7.23	Araport:AT1G26390,TAIR:AT1G26390,GeneID:839181		FAD-binding Berberine family protein		GO:0005576,GO:0005618,GO:0016491,GO:0071949	extracellular region|cell wall|oxidoreductase activity|FAD binding
AT1G26420	72.2402	101.752	42.7281	0.419555	-1.25307	0.000190552	0.000669085	Down	0.635032	0.583904	0.368001	1.32484	1.06775	1.57848	T1K7.20	Araport:AT1G26420,TAIR:AT1G26420,GeneID:839184		FAD-binding Berberine family protein		GO:0005576,GO:0005618,GO:0016491,GO:0071949	extracellular region|cell wall|oxidoreductase activity|FAD binding
AT1G26610	8.75959	2.27755	15.2416	6.71885	2.74821	0.0123917	0.029392	Up	0.057193	0.333761	0.12823	0	0.0363289	0.0446173	T1K7.2	Araport:AT1G26610,TAIR:AT1G26610,GeneID:839201		C2H2-like zinc finger protein	C2H2	GO:0003700,GO:0005634,GO:0006355,GO:0044212,GO:0046872	DNA-binding transcription factor activity|nucleus|regulation of transcription, DNA-templated|transcription regulatory region DNA binding|metal ion binding
AT1G26800	1694.92	714.745	2675.1	3.74275	1.9041	3.25e-70	1.75e-68	Up	42.1204	44.5125	45.0796	11.0938	11.9737	13.7824	T24P13.19	Araport:AT1G26800,TAIR:AT1G26800,GeneID:839223		RING/U-box superfamily protein		GO:0000209,GO:0005737,GO:0005829,GO:0016567,GO:0046872,GO:0051787,GO:0051865,GO:0061630,GO:0061635,GO:0071218,GO:0071629	protein polyubiquitination|cytoplasm|cytosol|protein ubiquitination|metal ion binding|misfolded protein binding|protein autoubiquitination|ubiquitin protein ligase activity|regulation of protein complex stability|cellular response to misfolded protein|cytoplasm protein quality control by the ubiquitin-proteasome system
AT1G26840	42.0845	65.4333	18.7357	0.286911	-1.80132	0.000739129	0.00233242	Down	0.582847	0.391856	0.0766439	1.09285	1.55255	1.17339	ORC6	Araport:AT1G26840,TAIR:AT1G26840,GeneID:839227	Origin Recognition Complex subunit 6. Involved in the initiation of DNA replication. Regulated transcriptionally during cell cycle, peaking at G1/S-phase. Target of E2F/DF family of transcription factors.	origin recognition complex protein 6		GO:0000808,GO:0003688,GO:0005664,GO:0006260,GO:0006270,GO:0009555	origin recognition complex|DNA replication origin binding|nuclear origin of replication recognition complex|DNA replication|DNA replication initiation|pollen development
AT1G26920	2272.49	1455.73	3089.25	2.12237	1.08567	2.88e-15	2.89e-14	Up	63.8485	59.4798	62.8859	23.3967	31.4968	36.9155	T2P11.11	Araport:AT1G26920,TAIR:AT1G26920,GeneID:839582		zinc finger CCHC domain protein
AT1G26960	397.392	257.833	536.951	2.08198	1.05796	1.4e-10	1.02e-09	Up	10.8079	8.35395	8.10046	4.7789	4.1263	4.81322	AtHB23	Araport:AT1G26960,TAIR:AT1G26960,GeneID:839587	Encodes a homeodomain leucine zipper class I (HD-Zip I) protein.	homeobox protein 23	HD-ZIP	GO:0003700,GO:0005634,GO:0009739,GO:0043565	DNA-binding transcription factor activity|nucleus|response to gibberellin|sequence-specific DNA binding
AT1G27020	1345.03	674.527	2015.54	2.98515	1.5778	5.77e-23	8.47e-22	Up	30.0544	27.6165	31.3231	9.6849	7.58603	14.1051	T7N9.8	Araport:AT1G27020,TAIR:AT1G27020,GeneID:839591		plant/protein
AT1G27050	422.804	264.443	581.165	2.20146	1.13846	3.07e-09	1.99e-08	Up	13.8967	10.8672	15.317	6.53783	7.44162	5.00564	ATHB54	Araport:AT1G27050,TAIR:AT1G27050,GeneID:839594	Encodes a protein with a RNA recognition motif. Previously annotated as ATHB54, a homeodomain leucine zipper (HD-Zip) family protein. In the TAIR10 genome release (2010), this locus was split into two loci: AT1G27045 (containing homeodomain and leucine zipper domains) and AT1G27050 (containing a RNA recognition motif). AT1G27045 is now named ATHB54. Note that Affymetrix ATH1 Probe Set linked to s…	homeobox leucine zipper protein		GO:0003700,GO:0003723	DNA-binding transcription factor activity|RNA binding
AT1G27290	2659.63	1061.92	4257.35	4.0071	2.00256	3.61e-105	3.24e-103	Up	75.9483	78.2226	79.8614	21.1574	18.1298	21.9306	F17L21.8	Araport:AT1G27290,TAIR:AT1G27290,GeneID:839618		transmembrane protein
AT1G27300	538.088	233.468	842.708	3.61559	1.85423	1.94e-35	4.52e-34	Up	19.6875	21.2907	19.2819	6.04787	6.32127	5.05093	F17L21.9	Araport:AT1G27300,TAIR:AT1G27300,GeneID:839619		transmembrane protein
AT1G27360	455.271	760.403	150.138	0.197605	-2.33931	9.18e-35	2.09e-33	Down	1.24888	0.861882	1.59306	6.60816	6.7333	6.25859	SPL11	Araport:AT1G27360,TAIR:AT1G27360,GeneID:839625	In conjunction with SPL10 and SPL2, SPL11 redundantly controls proper development of lateral organs in association with shoot maturation in the reproductive phase.	squamosa promoter-like 11	SBP	GO:0003677,GO:0003700,GO:0005634,GO:0006355,GO:0046872,GO:0048510	DNA binding|DNA-binding transcription factor activity|nucleus|regulation of transcription, DNA-templated|metal ion binding|regulation of timing of transition from vegetative to reproductive phase
AT1G27460	1275.12	311.062	2239.17	7.21194	2.85039	5.13e-110	5.02e-108	Up	18.091	19.5292	18.6948	2.85832	2.99116	2.31107	NPGR1	Araport:AT1G27460,TAIR:AT1G27460,GeneID:839637	encodes a calmodulin-binding protein that is expressed in pollen, suspension culture cells, flowers, and fruits.	no pollen germination related 1		GO:0005516,GO:0005886	calmodulin binding|plasma membrane
AT1G27720	63.8133	86.8348	40.7917	0.469497	-1.09081	0.00150022	0.00444403	Down	0.212127	0.277898	0.247066	0.680689	0.506889	0.455082	TAF4B	Araport:AT1G27720,TAIR:AT1G27720,GeneID:839665		TBP-associated factor 4B		GO:0003677,GO:0005669,GO:0008134,GO:0009506,GO:0045944,GO:0051123	DNA binding|transcription factor TFIID complex|transcription factor binding|plasmodesma|positive regulation of transcription by RNA polymerase II|RNA polymerase II preinitiation complex assembly	path:ath03022	Basal transcription factors
AT1G27730	3480.39	5689.45	1271.32	0.223478	-2.1618	9.92e-47	3.09e-45	Down	24.8781	24.4587	16.5366	98.5169	118.041	90.6186	STZ	Araport:AT1G27730,TAIR:AT1G27730,GeneID:839666	Related to Cys2/His2-type zinc-finger proteins found in higher plants. Compensated for a subset of calcineurin deficiency in yeast. Salt tolerance produced by ZAT10 appeared to be partially dependent on ENA1/PMR2, a P-type ATPase required for Li+ and Na+ efflux in yeast. The protein is localized to the nucleus, acts as a transcriptional repressor and is responsive to chitin oligomers. Also involv…	salt tolerance zinc finger	C2H2	GO:0003700,GO:0005634,GO:0006979,GO:0009409,GO:0009414,GO:0009611,GO:0009644,GO:0009651,GO:0009737,GO:0010117,GO:0010200,GO:0015979,GO:0035264,GO:0043565,GO:0045892,GO:0046872	DNA-binding transcription factor activity|nucleus|response to oxidative stress|response to cold|response to water deprivation|response to wounding|response to high light intensity|response to salt stress|response to abscisic acid|photoprotection|response to chitin|photosynthesis|multicellular organism growth|sequence-specific DNA binding|negative regulation of transcription, DNA-templated|metal i…
AT1G27770	7699.88	11368.2	4031.56	0.354648	-1.49554	3.07e-43	8.73e-42	Down	25.3418	26.8146	21.0832	71.9398	76.2029	67.5361	ACA1	Araport:AT1G27770,TAIR:AT1G27770,GeneID:839670	Encodes a chloroplast envelope Ca2+-ATPase with an N-terminal autoinhibitor.	autoinhibited Ca2+-ATPase 1		GO:0005262,GO:0005388,GO:0005516,GO:0005524,GO:0005783,GO:0005886,GO:0005887,GO:0009706,GO:0046872	calcium channel activity|calcium-transporting ATPase activity|calmodulin binding|ATP binding|endoplasmic reticulum|plasma membrane|integral component of plasma membrane|chloroplast inner membrane|metal ion binding
AT1G27940	20.7565	32.6815	8.83155	0.270146	-1.88819	0.00448169	0.0118963	Down	0.0609863	0.0173326	0.0678026	0.223944	0.0939112	0.254102	ABCB13	Araport:AT1G27940,TAIR:AT1G27940,GeneID:839687		P-glycoprotein 13		GO:0005524,GO:0016021,GO:0042626	ATP binding|integral component of membrane|ATPase activity, coupled to transmembrane movement of substances	path:ath02010	ABC transporters
AT1G28040	15.1885	29.6931	0.683985	0.0230232	-5.44077	8.28e-06	3.62e-05	Down	0	0	0.0313662	0.697396	0.358415	0.37516	F13K9.14	Araport:AT1G28040,TAIR:AT1G28040,GeneID:839697		RING/U-box superfamily protein		GO:0016021,GO:0016567,GO:0016740,GO:0046872	integral component of membrane|protein ubiquitination|transferase activity|metal ion binding
AT1G28100	408.994	256.872	561.116	2.18368	1.12676	1.08e-13	9.91e-13	Up	6.35525	6.5276	6.20932	3.49585	2.7782	2.88169	F13K9.27	Araport:AT1G28100,TAIR:AT1G28100,GeneID:839703		hypothetical protein		GO:0016123	xanthophyll biosynthetic process
AT1G28330	13585.1	2616.37	24553.7	9.38135	3.2298	1.41e-106	1.3e-104	Up	329.467	393.257	336.932	42.1362	26.861	50.0485	DYL1	Araport:AT1G28330,TAIR:AT1G28330,GeneID:839729	dormancy-associated protein (DRM1)	dormancy-associated protein-like 1		GO:0007275,GO:0009744,GO:0009749,GO:0009750	multicellular organism development|response to sucrose|response to glucose|response to fructose
AT1G28370	1052.97	1817.78	288.151	0.158543	-2.65706	4.13e-16	4.36e-15	Down	6.35787	5.82414	3.93735	32.1681	45.9841	27.4147	ERF11	Araport:AT1G28370,TAIR:AT1G28370,GeneID:839733	encodes a member of the ERF (ethylene response factor) subfamily B-1 of ERF/AP2 transcription factor family. The protein contains one AP2 domain. There are 15 members in this subfamily including ATERF-3, ATERF-4, ATERF-7, and leafy petiole.	ERF domain protein 11	ERF	GO:0003677,GO:0003700,GO:0005634,GO:0009873,GO:0010087,GO:0051301	DNA binding|DNA-binding transcription factor activity|nucleus|ethylene-activated signaling pathway|phloem or xylem histogenesis|cell division
AT1G28480	1417.22	2765.73	68.7178	0.0248474	-5.33076	2.07e-25	3.37e-24	Down	2.5305	2.37904	0.728816	71.2673	88.8713	76.496	GRX480	Araport:AT1G28480,TAIR:AT1G28480,GeneID:839748	Encodes GRX480, a member of the glutaredoxin family that regulates protein redox state. GRX480 interacts with TGA factors and suppresses JA-responsive PDF1.2 transcription. GRX480 transcription is SA-inducible and requires NPR1. Maybe involved in SA/JA cross-talk.	Thioredoxin superfamily protein		GO:0000122,GO:0005634,GO:0005737,GO:0009055,GO:0009751,GO:0009863,GO:0009867,GO:0015035,GO:0045454	negative regulation of transcription by RNA polymerase II|nucleus|cytoplasm|electron transfer activity|response to salicylic acid|salicylic acid mediated signaling pathway|jasmonic acid mediated signaling pathway|protein disulfide oxidoreductase activity|cell redox homeostasis
AT1G28660	570.906	340.289	801.524	2.35164	1.23367	2.6e-13	2.31e-12	Up	12.0434	11.5032	10.7669	4.94961	3.76874	6.62093	AT1G28660	Araport:AT1G28660,TAIR:AT1G28660,GeneID:839766		GDSL-like Lipase/Acylhydrolase superfamily protein		GO:0005576,GO:0016042,GO:0016788	extracellular region|lipid catabolic process|hydrolase activity, acting on ester bonds
AT1G29290	41.4979	72.3862	10.6097	0.146668	-2.76937	5.09e-08	2.92e-07	Down	0.222868	0.232248	0.0486705	0.972359	1.3988	1.21083	F28N24.30	Araport:AT1G29290,TAIR:AT1G29290,GeneID:28717277		B-cell lymphoma 6 protein		GO:0005179,GO:0006970,GO:0006995,GO:0007275,GO:0010037,GO:0048046,GO:1902025,GO:2000280	hormone activity|response to osmotic stress|cellular response to nitrogen starvation|multicellular organism development|response to carbon dioxide|apoplast|nitrate import|regulation of root development
AT1G29300	241	338.049	143.95	0.425783	-1.23181	5.39e-11	4.06e-10	Down	1.75612	1.66474	1.44331	4.46477	3.63433	3.86689	UNE1	Araport:AT1G29300,TAIR:AT1G29300,GeneID:839804		intracellular protein transporter, putative (DUF641)		GO:0009639,GO:0009959	response to red or far red light|negative gravitropism
AT1G29330	779.09	1182.07	376.108	0.318182	-1.65208	1.26e-32	2.66e-31	Down	4.97052	5.92401	5.45179	19.5587	18.3479	15.7776	ERD2	Araport:AT1G29330,TAIR:AT1G29330,GeneID:839807	Encodes a protein similar in sequence to animal and yeast endoplasmic reticulum retention signal receptor. This protein can functionally complement the yeast homologue. Transcript is detected in flower buds, stems, root, and leaves.	ER lumen protein retaining receptor family protein		GO:0005783,GO:0005789,GO:0005794,GO:0005801,GO:0006621,GO:0006888,GO:0015031,GO:0016021,GO:0046923	endoplasmic reticulum|endoplasmic reticulum membrane|Golgi apparatus|cis-Golgi network|protein retention in ER lumen|ER to Golgi vesicle-mediated transport|protein transport|integral component of membrane|ER retention sequence binding
AT1G29460	83.122	120.199	46.0454	0.383591	-1.38236	2.78e-05	0.000111639	Down	1.16347	0.738002	1.57236	3.36392	3.29351	2.81171	F15D2.35	Araport:AT1G29460,TAIR:AT1G29460,GeneID:839822		SAUR-like auxin-responsive protein family		GO:0005886,GO:0007275,GO:0009734,GO:0009926,GO:0040008	plasma membrane|multicellular organism development|auxin-activated signaling pathway|auxin polar transport|regulation of growth
AT1G29540	5.31136	10.2724	0.350302	0.0359125	-4.79937	0.00283676	0.00788114	Down	0	0.0310391	0	0.176065	0.504525	0.261408	F15D2.12	Araport:AT1G29540,TAIR:AT1G29540,GeneID:839831		LOW protein: protein BOBBER-like protein
AT1G29640	63.5389	121.295	5.7829	0.0477341	-4.38884	3.56e-05	0.000140555	Down	0.107157	0	0.35492	2.61284	3.74364	3.76179	F15D2.20	Araport:AT1G29640,TAIR:AT1G29640,GeneID:839841		senescence regulator (Protein of unknown function, DUF584)
AT1G29660	5436	2801.88	8070.12	2.88076	1.52645	6.95e-55	2.61e-53	Up	96.4006	103.212	110.606	34.4048	39.0181	39.1708	F15D2.21	Araport:AT1G29660,TAIR:AT1G29660,GeneID:839843		GDSL-like Lipase/Acylhydrolase superfamily protein		GO:0005634,GO:0009627,GO:0016042,GO:0016788,GO:0048046	nucleus|systemic acquired resistance|lipid catabolic process|hydrolase activity, acting on ester bonds|apoplast
AT1G29720	3637.92	4942.85	2332.98	0.472003	-1.08313	8.77e-35	2e-33	Down	14.9536	15.8746	15.5316	32.4971	34.1802	36.0911	CELLULOSE SYNTHASE LIKE D2	Araport:AT1G29720,TAIR:AT1G29720,GeneID:839850		Leucine-rich repeat transmembrane protein kinase
AT1G29980	281.76	381.286	182.235	0.477995	-1.06493	5.51e-10	3.8e-09	Down	1.90838	1.79093	2.03083	4.59118	3.94021	4.02007	T1P2.9	Araport:AT1G29980,TAIR:AT1G29980,GeneID:839877		choice-of-anchor C domain protein, putative (Protein of unknown function, DUF642)
AT1G30040	320.356	473.443	167.269	0.352979	-1.50235	3.49e-10	2.45e-09	Down	0.921826	2.15892	1.65615	4.28803	4.46702	5.30083	GA2OX2	Araport:AT1G30040,TAIR:AT1G30040,GeneID:839883	Encodes a gibberellin 2-oxidase that acts on C-19 gibberellins. AtGA2OX2 expression is responsive to cytokinin and KNOX activities.	gibberellin 2-oxidase		GO:0009639,GO:0009686,GO:0010114,GO:0045487,GO:0046872,GO:0051213,GO:0052634	response to red or far red light|gibberellin biosynthetic process|response to red light|gibberellin catabolic process|metal ion binding|dioxygenase activity|C-19 gibberellin 2-beta-dioxygenase activity	path:ath00904	Diterpenoid biosynthesis
AT1G30135	186.61	353.724	19.496	0.0551555	-4.18035	1.02e-43	2.95e-42	Down	0.533627	0.526817	0.572452	7.44306	12.1609	11.2837	JAZ8	Araport:AT1G30135,TAIR:AT1G30135,GeneID:839893		jasmonate-zim-domain protein 8		GO:0005634,GO:0006952,GO:0009611,GO:0031347,GO:2000022	nucleus|defense response|response to wounding|regulation of defense response|regulation of jasmonic acid mediated signaling pathway
AT1G30190	29.5156	48.0331	10.9981	0.228823	-2.1277	6.56e-05	0.000248507	Down	0.154124	0.281069	0.196339	0.64532	1.14216	1.08963	T2H7.2	Araport:AT1G30190,TAIR:AT1G30190,GeneID:839899		cotton fiber protein
AT1G30200	2050.53	1245.42	2855.63	2.29297	1.19722	1.44e-39	3.76e-38	Up	34.2832	36.5273	36.5187	16.3785	15.7854	16.8385	F12P21.1	Araport:AT1G30200,TAIR:AT1G30200,GeneID:839900		F-box family protein
AT1G30280	808.015	491.411	1124.62	2.28639	1.19307	1.38e-17	1.59e-16	Up	13.2791	14.6652	12.393	7.25214	5.00437	6.25168	F12P21.7	Araport:AT1G30280,TAIR:AT1G30280,GeneID:839908		Chaperone DnaJ-domain superfamily protein		GO:0005737,GO:0006898,GO:0007015,GO:0009903,GO:0009904,GO:0030276,GO:0031982,GO:0043231,GO:0071483,GO:0072318,GO:0072583	cytoplasm|receptor-mediated endocytosis|actin filament organization|chloroplast avoidance movement|chloroplast accumulation movement|clathrin binding|vesicle|intracellular membrane-bounded organelle|cellular response to blue light|clathrin coat disassembly|clathrin-dependent endocytosis
AT1G30320	405.511	663.579	147.444	0.221943	-2.17174	5.1e-28	9.21e-27	Down	1.22744	2.18465	1.36161	7.23408	7.09519	8.18787	T4K22.7	Araport:AT1G30320,TAIR:AT1G30320,GeneID:839912		Remorin family protein
AT1G30370	15.9303	30.4915	1.3691	0.0449235	-4.47638	2.46e-06	1.16e-05	Down	0.0254491	0.0265202	0	0.37608	0.458015	0.37225	DLAH	Araport:AT1G30370,TAIR:AT1G30370,GeneID:839917	Encodes a mitochondria-localized class III phospholipase A1 that plays a role in seed viability.	alpha/beta-Hydrolases superfamily protein		GO:0004620,GO:0004806,GO:0008970,GO:0009507,GO:0016042,GO:0047714	phospholipase activity|triglyceride lipase activity|phospholipase A1 activity|chloroplast|lipid catabolic process|galactolipase activity
AT1G30440	2020.08	1070.28	2969.87	2.77491	1.47244	2.15e-33	4.69e-32	Up	22.0099	23.0239	22.6957	10.2316	7.98292	7.3308	F26G16.2	Araport:AT1G30440,TAIR:AT1G30440,GeneID:839923		Phototropic-responsive NPH3 family protein		GO:0005886,GO:0016567	plasma membrane|protein ubiquitination
AT1G30530	1578.35	2197.03	959.672	0.436842	-1.19482	1.79e-23	2.69e-22	Down	11.2592	9.97741	12.7198	24.8145	26.2635	30.3234	UGT78D1	Araport:AT1G30530,TAIR:AT1G30530,GeneID:839933	The At1g30530 gene encodes a UDP-rhamnose:flavonol-3-O-rhamnosyltransferase (UGT78D1) attaching a rhamnosyl residue to the 3-O-position of the flavonols kaempferol and quercetin	UDP-glucosyl transferase 78D1		GO:0008194,GO:0043231,GO:0047230,GO:0051555,GO:0080043,GO:0080044,GO:0080167	UDP-glycosyltransferase activity|intracellular membrane-bounded organelle|flavonol-3-O-glucoside L-rhamnosyltransferase activity|flavonol biosynthetic process|quercetin 3-O-glucosyltransferase activity|quercetin 7-O-glucosyltransferase activity|response to karrikin	path:ath00944	Flavone and flavonol biosynthesis
AT1G30620	657.094	991.95	322.237	0.325018	-1.62141	9.39e-33	1.99e-31	Down	2.54187	2.54889	2.59047	7.74096	8.95301	7.98951	MUR4	Araport:AT1G30620,TAIR:AT1G30620,GeneID:839942	encodes a type-II membrane protein that catalyzes 4-epimerization of UDP-D-Xylose to UDP-L-Arabinose in vitro, the nucleotide sugar used by glycosyltransferases in the arabinosylation of cell wall polysaccharides and wall-resident proteoglycans.	NAD(P)-binding Rossmann-fold superfamily protein		GO:0003978,GO:0005794,GO:0006012,GO:0009832,GO:0016021,GO:0019567,GO:0032580,GO:0033358,GO:0045227,GO:0050373	UDP-glucose 4-epimerase activity|Golgi apparatus|galactose metabolic process|plant-type cell wall biogenesis|integral component of membrane|arabinose biosynthetic process|Golgi cisterna membrane|UDP-L-arabinose biosynthetic process|capsule polysaccharide biosynthetic process|UDP-arabinose 4-epimerase activity	path:ath00520	Amino sugar and nucleotide sugar metabolism
AT1G30720	57.6685	33.6511	81.686	2.41657	1.27296	0.00476293	0.0125655	Up	0.827779	1.20766	0.652389	0.239217	0.23369	0.699579	T5I8.17	Araport:AT1G30720,TAIR:AT1G30720,GeneID:839952		FAD-binding Berberine family protein		GO:0005576,GO:0005618,GO:0016491,GO:0071949	extracellular region|cell wall|oxidoreductase activity|FAD binding
AT1G30730	29.3625	14.7595	43.9656	2.97543	1.5731	0.00361285	0.0097876	Up	0.500201	0.763696	0.26081	0.206283	0.160095	0.170152	T5I8.18	Araport:AT1G30730,TAIR:AT1G30730,GeneID:839953		FAD-binding Berberine family protein		GO:0005576,GO:0005618,GO:0016491,GO:0071949	extracellular region|cell wall|oxidoreductase activity|FAD binding
AT1G30850	3.1181	6.2362	0	0.0303349	-5.04288	0.00707149	0.0178337	Down	0	0	0	0.144698	0.15549	0.053709	RSH4	Araport:AT1G30850,TAIR:AT1G30850,GeneID:839969		root hair specific 4
AT1G30960	88.7937	128.982	48.605	0.376633	-1.40877	5.76e-07	2.94e-06	Down	0.627257	0.682707	0.710278	1.93628	1.71178	1.97093	F17F8.15	Araport:AT1G30960,TAIR:AT1G30960,GeneID:839983		GTP-binding family protein		GO:0000028,GO:0005525,GO:0005739,GO:0005829,GO:0019843,GO:0043024,GO:0097177	ribosomal small subunit assembly|GTP binding|mitochondrion|cytosol|rRNA binding|ribosomal small subunit binding|mitochondrial ribosome binding
AT1G31480	991.172	597.317	1385.03	2.31769	1.21269	8.43e-26	1.4e-24	Up	9.4097	10.6161	9.17173	4.60378	3.99665	4.59826	SGR2	Araport:AT1G31480,TAIR:AT1G31480,GeneID:840038	encodes a novel protein that may be part of a gene family represented by bovine phosphatidic acid-preferring phospholipase A1 (PA-PLA1)containing a putative transmembrane domain. SGR2 is involved in the formation and function of the vacuole.	shoot gravitropism 2 (SGR2)		GO:0004620,GO:0005773,GO:0008970,GO:0009506,GO:0009590,GO:0009660,GO:0009705,GO:0009959,GO:0016042,GO:0046872	phospholipase activity|vacuole|phospholipase A1 activity|plasmodesma|detection of gravity|amyloplast organization|plant-type vacuole membrane|negative gravitropism|lipid catabolic process|metal ion binding
AT1G31690	1275.9	1851.14	700.665	0.378443	-1.40185	1.28e-18	1.56e-17	Down	4.93793	7.60763	7.67679	16.149	19.1064	20.6487	F27M3.11	Araport:AT1G31690,TAIR:AT1G31690,GeneID:840056		Copper amine oxidase family protein		GO:0005507,GO:0008131,GO:0009308,GO:0048038,GO:0052593,GO:0052594,GO:0052595,GO:0052596	copper ion binding|primary amine oxidase activity|amine metabolic process|quinone binding|tryptamine:oxygen oxidoreductase (deaminating) activity|aminoacetone:oxygen oxidoreductase(deaminating) activity|aliphatic-amine oxidase activity|phenethylamine:oxygen oxidoreductase (deaminating) activity	path:ath00260,path:ath00350,path:ath00360,path:ath00410,path:ath00950,path:ath00960	Glycine, serine and threonine metabolism|Tyrosine metabolism|Phenylalanine metabolism|beta-Alanine metabolism|Isoquinoline alkaloid biosynthesis|Tropane, piperidine and pyridine alkaloid biosynthesis
AT1G31930	1586.23	1052.87	2119.59	2.01349	1.0097	5.32e-17	5.93e-16	Up	12.5892	12.9637	13.7228	5.74832	6.92043	7.74392	XLG3	Araport:AT1G31930,TAIR:AT1G31930,GeneID:840083	Encodes XLG3 (extra-large G protein 3) that shows significant similarity to the G protein alpha subunit in its C terminal region. Involved in the regulation of root morphological and growth responses.	extra-large GTP-binding protein 3		GO:0001664,GO:0003924,GO:0005525,GO:0005634,GO:0005834,GO:0007188,GO:0009617,GO:0009723,GO:0031683,GO:0046872,GO:2000280	G protein-coupled receptor binding|GTPase activity|GTP binding|nucleus|heterotrimeric G-protein complex|adenylate cyclase-modulating G protein-coupled receptor signaling pathway|response to bacterium|response to ethylene|G-protein beta/gamma-subunit complex binding|metal ion binding|regulation of root development
AT1G32100	65.3585	96.2163	34.5006	0.359039	-1.47779	5.26e-05	0.000202412	Down	0.528026	0.425999	0.798504	1.92978	1.8393	1.32878	PRR1	Araport:AT1G32100,TAIR:AT1G32100,GeneID:840102	Encodes a pinoresinol reductase involved in lignan biosynthesis. Expressed strongly in roots and less strongly in stems. Shows specificity for pinoresinol and not lariciresinol.	pinoresinol reductase 1		GO:0009807,GO:0010283	lignan biosynthetic process|pinoresinol reductase activity	path:ath00999	Biosynthesis of secondary metabolites - unclassified
AT1G32170	593.587	61.3585	1125.82	18.4484	4.20543	2.77e-129	3.76e-127	Up	19.9206	17.9113	16.462	0.892061	1.19825	0.993349	XTH30	Araport:AT1G32170,TAIR:AT1G32170,GeneID:840109	xyloglucan endotransglycosylase-related protein (XTR4)	xyloglucan endotransglucosylase/hydrolase 30		GO:0004553,GO:0005618,GO:0010411,GO:0016762,GO:0042546,GO:0048046,GO:0071555	hydrolase activity, hydrolyzing O-glycosyl compounds|cell wall|xyloglucan metabolic process|xyloglucan:xyloglucosyl transferase activity|cell wall biogenesis|apoplast|cell wall organization
AT1G32190	141.274	80.5156	202.033	2.51206	1.32887	1e-07	5.56e-07	Up	2.33452	3.25281	2.31233	1.12412	1.16631	0.997569	F3C3.3	Araport:AT1G32190,TAIR:AT1G32190,GeneID:840111		alpha/beta-Hydrolases superfamily protein		GO:0005783,GO:0016021,GO:0016788	endoplasmic reticulum|integral component of membrane|hydrolase activity, acting on ester bonds	path:ath00062	Fatty acid elongation
AT1G32240	118.581	161.496	75.6655	0.468482	-1.09393	0.000169499	0.000600346	Down	0.679022	0.753548	0.557199	1.01647	1.5124	1.91765	KAN2	Araport:AT1G32240,TAIR:AT1G32240,GeneID:840116	Encodes a member of the KANADI family of putative transcription factors. Together with KAN1, this gene appears to be involved in the development of the carpel and the outer integument of the ovule.Along with KAN1 and KAN4 appears to regulate the proper localization of PIN1 in early embryogenesis.	Homeodomain-like superfamily protein	G2-like	GO:0003700,GO:0005634,GO:0006355,GO:0009944,GO:0030154,GO:0044212,GO:0048440,GO:0048481	DNA-binding transcription factor activity|nucleus|regulation of transcription, DNA-templated|polarity specification of adaxial/abaxial axis|cell differentiation|transcription regulatory region DNA binding|carpel development|plant ovule development
AT1G32350	45.4652	76.2051	14.7253	0.193042	-2.37302	8.56e-06	3.73e-05	Down	0.296684	0.324629	0.0302357	1.09608	0.95797	1.48995	AOX1D	Araport:AT1G32350,TAIR:AT1G32350,GeneID:840127		alternative oxidase 1D		GO:0005739,GO:0005743,GO:0009916,GO:0010230,GO:0016021,GO:0046872,GO:0070469,GO:0102721	mitochondrion|mitochondrial inner membrane|alternative oxidase activity|alternative respiration|integral component of membrane|metal ion binding|respiratory chain|ubiquinol:oxygen oxidoreductase activity
AT1G32540	838.3	538.418	1138.18	2.11649	1.08168	2.43e-09	1.59e-08	Up	9.5006	12.0043	9.49605	4.7069	6.54733	3.98195	LOL1	Araport:AT1G32540,TAIR:AT1G32540,GeneID:840148	Encodes a protein with 3 plant-specific zinc finger domains that acts as a positive regulator of cell death.	lsd one like 1	LSD	GO:0003677,GO:0005634,GO:0009626,GO:0009814,GO:0034052,GO:0043068,GO:2000121	DNA binding|nucleus|plant-type hypersensitive response|defense response, incompatible interaction|positive regulation of plant-type hypersensitive response|positive regulation of programmed cell death|regulation of removal of superoxide radicals
AT1G32630	397.367	600.782	193.952	0.322804	-1.63127	0.00713398	0.0179622	Down	1.28428	1.27986	1.04199	7.45636	2.25723	2.04269	F6N18.3	Araport:AT1G32630,TAIR:AT1G32630,GeneID:840157		FAM50A-like protein		GO:0003677,GO:0003700,GO:0005634,GO:0009269,GO:0009611,GO:0009737,GO:0009738,GO:0009753,GO:0009963,GO:0010200,GO:0019900,GO:0043565,GO:0043619,GO:0045893,GO:0046983,GO:0051090,GO:0051289,GO:2000068	DNA binding|DNA-binding transcription factor activity|nucleus|response to desiccation|response to wounding|response to abscisic acid|abscisic acid-activated signaling pathway|response to jasmonic acid|positive regulation of flavonoid biosynthetic process|response to chitin|kinase binding|sequence-specific DNA binding|regulation of transcription from RNA polymerase II promoter in response to oxida…
AT1G32640	9492.34	17576.6	1408.12	0.080129	-3.64153	9.91e-258	5.28e-255	Down	10.7507	8.49201	9.66562	120.234	134.245	122.272	MYC2	Araport:AT1G32640,TAIR:AT1G32640,GeneID:840158	Encodes a MYC-related transcriptional activator with a typical DNA binding domain of a basic helix-loop-helix leucine zipper motif. Binds to an extended G-Box promoter motif and interacts with Jasmonate ZIM-domain proteins. Its transcription is induced by dehydration stress and ABA treatment. Negative regulator of blue light#Aeimediated photomorphogenic growth and blue and far-red-light#Aeiregula…	Basic helix-loop-helix (bHLH) DNA-binding family protein	bHLH	GO:0003677,GO:0003700,GO:0005634,GO:0009269,GO:0009611,GO:0009737,GO:0009738,GO:0009753,GO:0009963,GO:0010200,GO:0019900,GO:0043565,GO:0043619,GO:0045893,GO:0046983,GO:0051090,GO:0051289,GO:2000068	DNA binding|DNA-binding transcription factor activity|nucleus|response to desiccation|response to wounding|response to abscisic acid|abscisic acid-activated signaling pathway|response to jasmonic acid|positive regulation of flavonoid biosynthetic process|response to chitin|kinase binding|sequence-specific DNA binding|regulation of transcription from RNA polymerase II promoter in response to oxida…	path:ath04016,path:ath04075	MAPK signaling pathway - plant|Plant hormone signal transduction
AT1G32690	60.3654	93.4863	27.2446	0.291695	-1.77747	2.19e-06	1.04e-05	Down	0.760109	0.39605	0.774643	2.76136	1.96146	2.22366	F6N18.23	Araport:AT1G32690,TAIR:AT1G32690,GeneID:840163		DUF740 family protein
AT1G32780	4.35142	8.36859	0.334249	0.0442148	-4.49933	0.0150312	0.0348805	Down	0.0130023	0	0	0.0128096	0.289066	0.0253583	F6N18.16	Araport:AT1G32780,TAIR:AT1G32780,GeneID:840172		GroES-like zinc-binding dehydrogenase family protein		GO:0004022,GO:0005737,GO:0008270	alcohol dehydrogenase (NAD) activity|cytoplasm|zinc ion binding	path:ath00010,path:ath00071,path:ath00350	Glycolysis / Gluconeogenesis|Fatty acid degradation|Tyrosine metabolism
AT1G32910	68.9637	137.927	0	0.00136941	-9.51223	5.7e-15	5.59e-14	Down	0	0	0	1.69468	1.79579	1.64248	F9L11.9	Araport:AT1G32910,TAIR:AT1G32910,GeneID:840185		HXXXD-type acyl-transferase family protein		GO:0005737,GO:0005829,GO:0009809,GO:0009963,GO:0010252,GO:0016020,GO:0047172,GO:0047205,GO:0071555	cytoplasm|cytosol|lignin biosynthetic process|positive regulation of flavonoid biosynthetic process|auxin homeostasis|membrane|shikimate O-hydroxycinnamoyltransferase activity|quinate O-hydroxycinnamoyltransferase activity|cell wall organization
AT1G32960	130.724	226.206	35.2413	0.155746	-2.68273	4.24e-19	5.27e-18	Down	0.366488	0.37303	0.156347	2.27549	1.80459	1.94481	SBT3.3	Araport:AT1G32960,TAIR:AT1G32960,GeneID:840190		Subtilase family protein		GO:0004252,GO:0009505,GO:0009682,GO:0031012	serine-type endopeptidase activity|plant-type cell wall|induced systemic resistance|extracellular matrix
AT1G33050	3103.02	1561.67	4644.38	2.97334	1.57209	8.06e-65	3.78e-63	Up	33.4497	36.8699	35.8074	13.4911	11.3578	12.5467	T9L6.12	Araport:AT1G33050,TAIR:AT1G33050,GeneID:840200		hypothetical protein
AT1G33055	5.69472	0	11.3894	63.9921	5.99982	0.000205036	0.00071497	Up	0.124477	0.352085	0.126857	0	0	0	AT1G33055	Araport:AT1G33055,TAIR:AT1G33055,GeneID:840201		hypothetical protein
AT1G33060	694.758	412.246	977.271	2.36916	1.24438	1.08e-18	1.32e-17	Up	8.97012	9.37843	10.3458	3.79291	3.82564	5.07932	NAC014	Araport:AT1G33060,TAIR:AT1G33060,GeneID:840202		NAC 014	NAC	GO:0003677,GO:0003700,GO:0005634,GO:0016021	DNA binding|DNA-binding transcription factor activity|nucleus|integral component of membrane
AT1G33240	6697.11	1482.28	11911.9	8.0393	3.00707	1.21e-107	1.15e-105	Up	81.3505	82.5282	79.947	7.83731	12.0624	11.7601	GTL1	Araport:AT1G33240,TAIR:AT1G33240,GeneID:840218	Encodes a plant transcriptional activator that contains two separate, but similar, trihelix DNA-binding domains, similar to GT-2. Gene is expressed in all aerial parts of the plant, with higher level of expression in siliques. At-GTL2 was thought to be a duplicated copy of this gene but is likely to be a cloning artefact, the result of a chimeric clone. Regulates ploidy-dependent cell growth in t…	GT-2-like 1	Trihelix	GO:0003677,GO:0003700,GO:0005634,GO:0006351,GO:0008361,GO:0009414,GO:0010090,GO:0030308,GO:0032876,GO:0042631,GO:0043565,GO:0045892,GO:2000037,GO:2000038	DNA binding|DNA-binding transcription factor activity|nucleus|transcription, DNA-templated|regulation of cell size|response to water deprivation|trichome morphogenesis|negative regulation of cell growth|negative regulation of DNA endoreduplication|cellular response to water deprivation|sequence-specific DNA binding|negative regulation of transcription, DNA-templated|regulation of stomatal complex…
AT1G33250	968.186	644.676	1291.7	2.00267	1.00193	1.41e-18	1.72e-17	Up	12.8392	11.6535	11.5588	6.60103	5.56772	6.69807	T16O9.11	Araport:AT1G33250,TAIR:AT1G33250,GeneID:840219		beta-1,3-n-acetylglucosaminyltransferase radical fringe protein, putative (DUF604)
AT1G33260	105.243	164.325	46.1623	0.280702	-1.83289	1.51e-10	1.09e-09	Down	0.571089	0.544475	0.557242	1.83153	1.73659	2.68969	T16O9.6	Araport:AT1G33260,TAIR:AT1G33260,GeneID:840220		Protein kinase superfamily protein
AT1G33440	40.3876	61.0742	19.7009	0.322264	-1.63369	0.00411875	0.0110068	Down	0.141103	0.399114	0.0513576	0.506401	0.821595	0.579871	AtNPF4.4	Araport:AT1G33440,TAIR:AT1G33440,GeneID:840237		Major facilitator superfamily protein		GO:0005886,GO:0015333,GO:0016021,GO:0035673,GO:1904680	plasma membrane|peptide:proton symporter activity|integral component of membrane|oligopeptide transmembrane transporter activity|peptide transmembrane transporter activity
AT1G33475	45.9709	23.48	68.4619	2.93282	1.55229	0.00230965	0.00655343	Up	1.29029	1.40391	1.1796	0.598197	0.662903	0.11102	AT1G33475	Araport:AT1G33475,TAIR:AT1G33475,GeneID:840241		SNARE-like superfamily protein		GO:0015031,GO:0016021	protein transport|integral component of membrane
AT1G33560	629.981	847.964	411.997	0.485912	-1.04123	1.71e-13	1.55e-12	Down	3.67107	3.13295	2.69371	6.82979	6.36556	7.28026	ADR1	Araport:AT1G33560,TAIR:AT1G33560,GeneID:840250	Encodes a NBS-LRR disease resistance protein that possesses N-terminal kinase subdomains. Activation tagged mutant of ADR1 showed elevated levels of SA and reactive oxygen species in addition to number of defense gene transcripts. Exhibits resistance to number of microbial pathogens.	Disease resistance protein (CC-NBS-LRR class) family
AT1G33700	155.522	63.2594	247.785	3.91482	1.96895	4.4e-13	3.85e-12	Up	1.15113	1.71614	1.2012	0.260456	0.355684	0.47264	F14M2.16	Araport:AT1G33700,TAIR:AT1G33700,GeneID:840261		Beta-glucosidase, GBA2 type family protein				path:ath00511,path:ath00600	Other glycan degradation|Sphingolipid metabolism
AT1G33720	3488.06	2156.25	4819.87	2.23558	1.16065	1.36e-28	2.51e-27	Up	37.5758	37.6169	32.6587	15.0722	17.0622	18.3356	CYP76C6	Araport:AT1G33720,TAIR:AT1G33720,GeneID:840263	member of CYP76C	cytochrome P450, family 76, subfamily C, polypeptide 6		GO:0005506,GO:0016020,GO:0016021,GO:0016709,GO:0020037	iron ion binding|membrane|integral component of membrane|oxidoreductase activity, acting on paired donors, with incorporation or reduction of molecular oxygen, NAD(P)H as one donor, and incorporation of one atom of oxygen|heme binding
AT1G33730	14.5207	24.9585	4.08294	0.163864	-2.60943	0.00136498	0.00407504	Down	0.103433	0.0615919	0.0150586	0.611399	0.297216	0.244951	CYP76C5	Araport:AT1G33730,TAIR:AT1G33730,GeneID:840264	member of CYP76C	cytochrome P450, family 76, subfamily C, polypeptide 5		GO:0005506,GO:0016020,GO:0016021,GO:0016709,GO:0020037	iron ion binding|membrane|integral component of membrane|oxidoreductase activity, acting on paired donors, with incorporation or reduction of molecular oxygen, NAD(P)H as one donor, and incorporation of one atom of oxygen|heme binding
AT1G33760	153.702	216.088	91.3155	0.422731	-1.24219	2.09e-06	9.94e-06	Down	2.11979	2.06714	1.10989	4.11927	4.48828	4.49453	F14M2.12	Araport:AT1G33760,TAIR:AT1G33760,GeneID:840267	encodes a member of the DREB subfamily A-4 of ERF/AP2 transcription factor family. The protein contains one AP2 domain. There are 17 members in this subfamily including TINY.	Integrase-type DNA-binding superfamily protein	ERF	GO:0003677,GO:0003700,GO:0005634,GO:0009873	DNA binding|DNA-binding transcription factor activity|nucleus|ethylene-activated signaling pathway
AT1G33770	491.358	190.451	792.264	4.15646	2.05536	1.01e-33	2.23e-32	Up	4.91522	6.7875	5.07435	1.58847	1.24825	1.39221	F14M2.11	Araport:AT1G33770,TAIR:AT1G33770,GeneID:840268		Protein kinase superfamily protein		GO:0004693,GO:0005524,GO:0005634,GO:0006468	cyclin-dependent protein serine/threonine kinase activity|ATP binding|nucleus|protein phosphorylation
AT1G33790	140.941	83.7393	198.142	2.357	1.23695	3.27e-06	1.51e-05	Up	1.61634	1.70147	1.53018	0.832568	0.434305	0.896098	F14M2.9	Araport:AT1G33790,TAIR:AT1G33790,GeneID:840271		jacalin lectin family protein		GO:0009507,GO:0030246	chloroplast|carbohydrate binding
AT1G33950	24.4219	47.1725	1.67124	0.0359985	-4.79592	3.61e-08	2.1e-07	Down	0.0940856	0	0	0.667377	0.776919	1.33951	AT1G33950	Araport:AT1G33950,TAIR:AT1G33950,GeneID:840292		Avirulence induced gene (AIG1) family protein		GO:0005525	GTP binding
AT1G33960	194.799	340.721	48.8758	0.143511	-2.80077	1.13e-20	1.51e-19	Down	0.845525	0.774309	0.248063	4.37953	4.76044	4.45986	AIG1	Araport:AT1G33960,TAIR:AT1G33960,GeneID:840293	Identified as a gene that is induced by avirulence gene avrRpt2 and RPS2 after infection with Pseudomonas syringae pv maculicola strain ES4326 carrying avrRpt2	P-loop containing nucleoside triphosphate hydrolases superfamily protein		GO:0005525,GO:0009617	GTP binding|response to bacterium
AT1G34010	301.141	169.989	432.293	2.54927	1.35008	3.4e-13	2.99e-12	Up	8.51951	8.30845	7.47224	3.19389	3.89106	2.86729	F12G12.17	Araport:AT1G34010,TAIR:AT1G34010,GeneID:840298		hypothetical protein
AT1G34300	1471.67	970.554	1972.79	2.03217	1.02302	3.51e-17	3.95e-16	Up	15.1691	17.3254	14.8441	9.48984	7.30961	7.60402	F23M19.5	Araport:AT1G34300,TAIR:AT1G34300,GeneID:840330		lectin protein kinase family protein
AT1G34630	515.044	249.497	780.591	3.13039	1.64634	7.69e-29	1.43e-27	Up	8.89679	9.36668	8.39009	3.3503	2.9335	2.62392	F12K21.3	Araport:AT1G34630,TAIR:AT1G34630,GeneID:840367		transmembrane protein
AT1G34760	749.969	279.499	1220.44	4.36683	2.12659	4.29e-61	1.86e-59	Up	21.0833	21.7259	22.9409	5.8913	4.97278	4.8976	GRF11	Araport:AT1G34760,TAIR:AT1G34760,GeneID:840380	Encodes a 14-3-3 protein. Binds H+-ATPase in response to blue light.	general regulatory factor 11		GO:0005634,GO:0005737,GO:0019904,GO:0051117	nucleus|cytoplasm|protein domain specific binding|ATPase binding
AT1G35140	7001.6	1564.85	12438.4	7.95287	2.99148	3.8e-109	3.67e-107	Up	237.86	241.263	191.04	29.0115	34.3695	24.4175	PHI-1	Araport:AT1G35140,TAIR:AT1G35140,GeneID:840399	EXL1 is involved in the C-starvation response. Phenotypic changes of an exl1 loss of function mutant became evident only under corresponding experimental conditions. For example, the mutant showed diminished biomass production in a short-day/low light growth regime, impaired survival during extended night, and impaired survival of anoxia stress.	Phosphate-responsive 1 family protein		GO:0001666,GO:0005615,GO:0005794,GO:0009505,GO:0048046	response to hypoxia|extracellular space|Golgi apparatus|plant-type cell wall|apoplast
AT1G35210	289.133	437.715	140.551	0.321043	-1.63916	2.37e-10	1.69e-09	Down	2.52442	4.20475	1.94006	10.4577	10.6024	7.08238	T32G9.25	Araport:AT1G35210,TAIR:AT1G35210,GeneID:840410		hypothetical protein
AT1G35230	188.059	286.501	89.6167	0.312657	-1.67735	2.56e-08	1.51e-07	Down	3.39555	3.35222	1.2142	8.77389	7.25255	10.7177	AGP5	Araport:AT1G35230,TAIR:AT1G35230,GeneID:840412	Encodes arabinogalactan-protein (AGP5).	arabinogalactan protein 5		GO:0005886,GO:0031225	plasma membrane|anchored component of membrane
AT1G35260	64.6493	94.6152	34.6834	0.365921	-1.4504	7.69e-05	0.000288724	Down	0.914925	1.41477	0.721872	2.52964	2.53085	3.68387	MLP165	Araport:AT1G35260,TAIR:AT1G35260,GeneID:840415		MLP-like protein 165		GO:0006952	defense response
AT1G35320	61.9263	83.3659	40.4867	0.485379	-1.04282	0.00437248	0.0116247	Down	0.259974	0.41139	0.490639	0.664018	0.846062	0.995274	T9I1.9	Araport:AT1G35320,TAIR:AT1G35320,GeneID:840421		transmembrane protein
AT1G35350	4197	2620.21	5773.78	2.20385	1.14002	7.39e-45	2.19e-43	Up	41.9651	42.9058	42.5864	19.8365	20.0387	20.6379	T9I1.12	Araport:AT1G35350,TAIR:AT1G35350,GeneID:840424		EXS (ERD1/XPR1/SYG1) family protein		GO:0005794,GO:0005802,GO:0005886,GO:0006817,GO:0015114,GO:0016021,GO:0016036	Golgi apparatus|trans-Golgi network|plasma membrane|phosphate ion transport|phosphate ion transmembrane transporter activity|integral component of membrane|cellular response to phosphate starvation
AT1G35670	657.336	244.375	1070.3	4.37359	2.12882	5.1e-51	1.72e-49	Up	12.6792	14.2183	12.5813	3.65599	2.63222	3.17244	CDPK2	Araport:AT1G35670,TAIR:AT1G35670,GeneID:840471	Encodes a Ca(2+)-dependent, calmodulin-independent protein kinase that is rapidly induced by drought and high-salt stress but not by low-temperature stress or heat stress. Positive regulator of ABA signaling. Phosphorylates ABA responsive transcription factors ABF1 and ABF4.	calcium-dependent protein kinase 2		GO:0004672,GO:0004674,GO:0004683,GO:0005509,GO:0005524,GO:0005634,GO:0005737,GO:0005829,GO:0005886,GO:0006468,GO:0009738,GO:0009789,GO:0009931,GO:0018105,GO:0035556,GO:0046777,GO:0080092,GO:1901979	protein kinase activity|protein serine/threonine kinase activity|calmodulin-dependent protein kinase activity|calcium ion binding|ATP binding|nucleus|cytoplasm|cytosol|plasma membrane|protein phosphorylation|abscisic acid-activated signaling pathway|positive regulation of abscisic acid-activated signaling pathway|calcium-dependent protein serine/threonine kinase activity|peptidyl-serine phosphory…	path:ath04626	Plant-pathogen interaction
AT1G35910	11.5426	21.684	1.40121	0.063598	-3.97487	0.000193544	0.00067851	Down	0	0.0606809	0	0.344203	0.261996	0.383286	TPPD	Araport:AT1G35910,TAIR:AT1G35910,GeneID:840493		Haloacid dehalogenase-like hydrolase (HAD) superfamily protein		GO:0004805,GO:0005992,GO:0006970,GO:0006979,GO:0009507,GO:0009651,GO:0015927	trehalose-phosphatase activity|trehalose biosynthetic process|response to osmotic stress|response to oxidative stress|chloroplast|response to salt stress|trehalase activity	path:ath00500	Starch and sucrose metabolism
AT1G36060	11.6698	1.31618	22.0235	16.9773	4.08554	0.000136919	0.000492702	Up	0.245921	0.448474	0.11278	0	0.0260347	0.0239809	F5J5.5	Araport:AT1G36060,TAIR:AT1G36060,GeneID:840510	encodes a member of the DREB subfamily A-6 of ERF/AP2 transcription factor family. The protein contains one AP2 domain. There are 8 members in this subfamily including RAP2.4.	Integrase-type DNA-binding superfamily protein	ERF	GO:0003700,GO:0005634,GO:0006355,GO:0009415,GO:0009873,GO:0043565	DNA-binding transcription factor activity|nucleus|regulation of transcription, DNA-templated|response to water|ethylene-activated signaling pathway|sequence-specific DNA binding
AT1G36370	2113.04	979.019	3247.07	3.31692	1.72984	2.4e-48	7.7e-47	Up	37.3647	28.4432	35.7914	10.0657	10.35	11.651	SHM7	Araport:AT1G36370,TAIR:AT1G36370,GeneID:840543	Encodes a putative serine hydroxymethyltransferase.	serine hydroxymethyltransferase 7		GO:0004372,GO:0005634,GO:0005737,GO:0006544,GO:0006565,GO:0006730,GO:0008270,GO:0016597,GO:0019264,GO:0030170,GO:0035999,GO:0044030,GO:0046500,GO:0046653,GO:0046655,GO:0046686,GO:0050897,GO:0055063,GO:0070905,GO:1904482	glycine hydroxymethyltransferase activity|nucleus|cytoplasm|glycine metabolic process|L-serine catabolic process|one-carbon metabolic process|zinc ion binding|amino acid binding|glycine biosynthetic process from serine|pyridoxal phosphate binding|tetrahydrofolate interconversion|regulation of DNA methylation|S-adenosylmethionine metabolic process|tetrahydrofolate metabolic process|folic acid meta…	path:ath00260,path:ath00460,path:ath00630,path:ath00670	Glycine, serine and threonine metabolism|Cyanoamino acid metabolism|Glyoxylate and dicarboxylate metabolism|One carbon pool by folate
AT1G36622	73.9377	137.871	10.0048	0.072178	-3.7923	5.69e-19	7.05e-18	Down	0.15077	0.381565	0.109752	2.82217	2.71344	3.75958	AT1G36622	Araport:AT1G36622,TAIR:AT1G36622,GeneID:5007772		transmembrane protein		GO:0008299,GO:0009507,GO:0009536,GO:0009570,GO:0010236,GO:0015979,GO:0046872,GO:0050347,GO:0052924	isoprenoid biosynthetic process|chloroplast|plastid|chloroplast stroma|plastoquinone biosynthetic process|photosynthesis|metal ion binding|trans-octaprenyltranstransferase activity|all-trans-nonaprenyl-diphosphate synthase (geranylgeranyl-diphosphate specific) activity
AT1G36940	122.869	42.3378	203.4	4.79978	2.26297	5.09e-13	4.43e-12	Up	3.65456	4.88063	2.22382	0.786495	0.71369	0.847685	T32E20.35	Araport:AT1G36940,TAIR:AT1G36940,GeneID:840603		myotubularin-like protein
AT1G37130	8730.08	5676.65	11783.5	2.07561	1.05353	6.8e-19	8.38e-18	Up	90.0324	90.2886	67.8922	40.929	36.355	48.1987	NIA2	Araport:AT1G37130,TAIR:AT1G37130,GeneID:840630	Identified as a mutant resistant to chlorate. Encodes nitrate reductase structural gene. Involved in nitrate assimilation. Has nitrate reductase activity. Up-regulated by the fungus P. indica. Binds transcription factor At2g35940.	nitrate reductase 2		GO:0005773,GO:0005829,GO:0005886,GO:0006809,GO:0008940,GO:0009416,GO:0009610,GO:0009635,GO:0009703,GO:0020037,GO:0030151,GO:0042128,GO:0043546,GO:0050464,GO:0071949	vacuole|cytosol|plasma membrane|nitric oxide biosynthetic process|nitrate reductase activity|response to light stimulus|response to symbiotic fungus|response to herbicide|nitrate reductase (NADH) activity|heme binding|molybdenum ion binding|nitrate assimilation|molybdopterin cofactor binding|nitrate reductase (NADPH) activity|FAD binding	path:ath00910	Nitrogen metabolism
AT1G43000	21.3872	34.0042	8.77017	0.258865	-1.94973	0.0066877	0.0169865	Down	0.453647	0.094548	0.0462321	1.05027	0.696377	0.66356	F13A11.6	Araport:AT1G43000,TAIR:AT1G43000,GeneID:840898		PLATZ transcription factor family protein
AT1G43160	91.8844	183.769	0	0.00102789	-9.9261	2.93e-16	3.12e-15	Down	0	0	0	3.17983	4.60953	4.605	RAP2.6	Araport:AT1G43160,TAIR:AT1G43160,GeneID:840915	encodes a member of the ERF (ethylene response factor) subfamily B-4 of ERF/AP2 transcription factor family (RAP2.6). The protein contains one AP2 domain. There are 7 members in this subfamily.	related to AP2 6	ERF	GO:0003677,GO:0003700,GO:0005634,GO:0006952,GO:0006970,GO:0009409,GO:0009414,GO:0009611,GO:0009651,GO:0009658,GO:0009737,GO:0009751,GO:0009753,GO:0009873,GO:0034605,GO:0045893	DNA binding|DNA-binding transcription factor activity|nucleus|defense response|response to osmotic stress|response to cold|response to water deprivation|response to wounding|response to salt stress|chloroplast organization|response to abscisic acid|response to salicylic acid|response to jasmonic acid|ethylene-activated signaling pathway|cellular response to heat|positive regulation of transcripti…
AT1G43650	255.066	131.806	378.327	2.87569	1.52391	8.52e-15	8.28e-14	Up	5.54592	5.54311	5.95996	1.63763	2.3357	2.22512	UMAMIT22	Araport:AT1G43650,TAIR:AT1G43650,GeneID:840949	nodulin MtN21-like transporter family protein	nodulin MtN21 /EamA-like transporter family protein		GO:0005886,GO:0016021,GO:0022857	plasma membrane|integral component of membrane|transmembrane transporter activity
AT1G43790	27.783	43.7257	11.8404	0.271499	-1.88098	0.00151312	0.00447509	Down	0.607123	0.120509	0.294634	0.996875	1.13244	1.83249	TED6	Araport:AT1G43790,TAIR:AT1G43790,GeneID:840976		tracheary element differentiation-related 6
AT1G44130	30.3838	53.6842	7.08343	0.132612	-2.91472	1.97e-05	8.11e-05	Down	0.288046	0.0706279	0	0.884716	0.91483	1.04093	T7O23.17	Araport:AT1G44130,TAIR:AT1G44130,GeneID:841016		Eukaryotic aspartyl protease family protein		GO:0004190,GO:0006508,GO:0030163	aspartic-type endopeptidase activity|proteolysis|protein catabolic process
AT1G44350	3412.65	5238.99	1586.31	0.302832	-1.72341	4.64e-81	3e-79	Down	15.8903	15.192	15.5809	55.2048	54.519	51.3723	ILL6	Araport:AT1G44350,TAIR:AT1G44350,GeneID:841026	encodes a protein similar to IAA amino acid conjugate hydrolase.	IAA-amino acid hydrolase ILR1-like 6		GO:0009694,GO:0009753,GO:0010112,GO:0046872,GO:1990206	jasmonic acid metabolic process|response to jasmonic acid|regulation of systemic acquired resistance|metal ion binding|jasmonyl-Ile conjugate hydrolase activity
AT1G44608	12.5649	3.50429	21.6254	6.34767	2.66623	0.00866759	0.021385	Up	0.208103	0.433723	0.848329	0.0227799	0.220311	0	T18F15.16	Araport:AT1G44608,TAIR:AT1G44608,GeneID:841034		hypothetical protein
AT1G44900	324.09	437.212	210.967	0.482798	-1.05051	2.98e-07	1.57e-06	Down	1.57122	1.79294	1.10857	3.1309	3.68807	2.8425	MCM2	Araport:AT1G44900,TAIR:AT1G44900,GeneID:841056	Encodes MCM2 (MINICHROMOSOME MAINTENANCE 2), a protein essential to embryo development. Overexpression results in altered root meristem function.	minichromosome maintenance (MCM2/3/5) family protein		GO:0000347,GO:0003677,GO:0004386,GO:0005524,GO:0005829,GO:0006268,GO:0006270,GO:0007049,GO:0009793,GO:0010082,GO:0016032,GO:0042127,GO:0042555,GO:0046872,GO:0048364,GO:1905775	THO complex|DNA binding|helicase activity|ATP binding|cytosol|DNA unwinding involved in DNA replication|DNA replication initiation|cell cycle|embryo development ending in seed dormancy|regulation of root meristem growth|viral process|regulation of cell proliferation|MCM complex|metal ion binding|root development|negative regulation of DNA helicase activity	path:ath03030	DNA replication
AT1G44960	330.823	447.955	213.691	0.476663	-1.06896	2.05e-08	1.22e-07	Down	3.76343	4.33361	3.89291	11.2342	6.99227	8.16552	T12C22.23	Araport:AT1G44960,TAIR:AT1G44960,GeneID:841061		SNARE associated Golgi protein family
AT1G45010	381.292	554.986	207.599	0.374355	-1.41752	1.88e-13	1.69e-12	Down	2.27703	1.74782	2.8526	6.69702	6.87905	5.61067	F27F5.9	Araport:AT1G45010,TAIR:AT1G45010,GeneID:841066		TRAM, LAG1 and CLN8 (TLC) lipid-sensing domain containing protein
AT1G45145	4102.24	5715.09	2489.39	0.4356	-1.19892	9.57e-32	1.96e-30	Down	73.0043	62.9059	64.1836	180.908	148.126	151.972	TRX5	Araport:AT1G45145,TAIR:AT1G45145,GeneID:841082	encodes a cytosolic thioredoxin that reduces disulfide bridges of target proteins by the reversible formation of a disulfide bridge between two neighboring Cys residues present in the active site. Thioredoxins have been found to regulate a variety of biological reactions in prokaryotic and eukaryotic cells.	thioredoxin H-type 5		GO:0005829,GO:0005886,GO:0006662,GO:0006979,GO:0009506,GO:0010188,GO:0015035,GO:0016671,GO:0045454,GO:0046686,GO:0048046,GO:0050832	cytosol|plasma membrane|glycerol ether metabolic process|response to oxidative stress|plasmodesma|response to microbial phytotoxin|protein disulfide oxidoreductase activity|oxidoreductase activity, acting on a sulfur group of donors, disulfide as acceptor|cell redox homeostasis|response to cadmium ion|apoplast|defense response to fungus
AT1G47130	7.64864	15.2973	0	0.0123572	-6.33851	2.08e-05	8.53e-05	Down	0	0	0	1.59297	2.05414	1.47163	AT1G47130	Araport:AT1G47130,GeneID:28717332		hypothetical protein
AT1G47395	24.3771	36.4434	12.3108	0.33884	-1.56133	0.0049251	0.0129512	Down	0.353279	0.339828	0.304644	0.883493	1.4097	0.768497	AT1G47395	Araport:AT1G47395,TAIR:AT1G47395,GeneID:841143		hypothetical protein
AT1G47400	19.3159	35.2179	3.41388	0.0970928	-3.36449	5.03e-06	2.26e-05	Down	0.116236	0.0908461	0.088844	1.5173	1.04597	0.623411	T3F24.21	Araport:AT1G47400,TAIR:AT1G47400,GeneID:841144		hypothetical protein
AT1G47510	4.99671	9.99343	0	0.018844	-5.72975	0.000785051	0.00246047	Down	0	0	0	0.0389376	0.0523024	0.221611	5PTASE11	Araport:AT1G47510,TAIR:AT1G47510,GeneID:841160	Encodes a phosphatidylinositol polyphosphate 5-phosphatase. It can dephosphorylate PI(4,5)P2, PI(3,5)P2, and PI(3,4,5)P3, but, it is not active against PI(5)P or the water soluble inositol(1,4,5)P3 or inositol(1,3,4,5)P4. The transcript levels for this gene rise in response to auxin, ABA, and JA.	inositol polyphosphate 5-phosphatase 11		GO:0004439,GO:0005886,GO:0009651,GO:0009733,GO:0009737,GO:0009753,GO:0034485,GO:0043813,GO:0046855,GO:0046856	phosphatidylinositol-4,5-bisphosphate 5-phosphatase activity|plasma membrane|response to salt stress|response to auxin|response to abscisic acid|response to jasmonic acid|phosphatidylinositol-3,4,5-trisphosphate 5-phosphatase activity|phosphatidylinositol-3,5-bisphosphate 5-phosphatase activity|inositol phosphate dephosphorylation|phosphatidylinositol dephosphorylation
AT1G47655	58	35.7645	80.2355	2.24741	1.16826	0.0133	0.0313078	Up	1.77912	2.3419	1.47914	0.253688	1.11523	1.2327	AT1G47655	Araport:AT1G47655,TAIR:AT1G47655,GeneID:841175		Dof-type zinc finger DNA-binding family protein	Dof	GO:0003677,GO:0003700,GO:0005634,GO:0006355,GO:0046872	DNA binding|DNA-binding transcription factor activity|nucleus|regulation of transcription, DNA-templated|metal ion binding
AT1G47890	49.8634	76.6381	23.0887	0.301677	-1.72892	0.000894228	0.00277516	Down	0.310789	0.150637	0.0368292	0.505558	0.535615	0.690707	RLP7	Araport:AT1G47890,TAIR:AT1G47890,GeneID:841206		receptor like protein 7		GO:0005886,GO:0016021	plasma membrane|integral component of membrane
AT1G48100	145.862	268.079	23.6449	0.0881185	-3.50441	2.33e-35	5.38e-34	Down	0.292166	0.353176	0.178651	3.29284	3.17966	3.30489	F21D18.18	Araport:AT1G48100,TAIR:AT1G48100,GeneID:841228		Pectin lyase-like superfamily protein		GO:0004650,GO:0005576,GO:0005618,GO:0005975,GO:0009831	polygalacturonase activity|extracellular region|cell wall|carbohydrate metabolic process|plant-type cell wall modification involved in multidimensional cell growth
AT1G48120	286.847	434.231	139.464	0.320953	-1.63957	1.39e-19	1.77e-18	Down	0.57114	0.724563	0.769332	2.37792	2.05579	2.30527	F21D18.16	Araport:AT1G48120,TAIR:AT1G48120,GeneID:841230		serine/threonine-protein phosphatase 7 long form-like protein		GO:0004721,GO:0005634,GO:0046872	phosphoprotein phosphatase activity|nucleus|metal ion binding
AT1G48280	179.599	117.85	241.348	2.05084	1.03621	2.58e-05	0.000104353	Up	2.01315	3.22663	2.63145	1.41203	1.51736	1.07758	F11A17.16	Araport:AT1G48280,TAIR:AT1G48280,GeneID:841248		hydroxyproline-rich glycoprotein family protein		GO:0009507,GO:0009707,GO:0009902	chloroplast|chloroplast outer membrane|chloroplast relocation
AT1G48330	558.063	1011.75	104.373	0.103075	-3.27823	1.05e-62	4.73e-61	Down	1.86334	3.09631	2.87411	21.4085	29.6696	28.213	F11A17.11	Araport:AT1G48330,TAIR:AT1G48330,GeneID:841253		SsrA-binding protein
AT1G48370	490.491	683.618	297.365	0.435341	-1.19978	9.77e-16	1.01e-14	Down	2.59489	2.3394	2.63581	5.8613	6.61476	5.68508	YSL8	Araport:AT1G48370,TAIR:AT1G48370,GeneID:841257	Arabidopsis thaliana metal-nicotianamine transporter YSL4	YELLOW STRIPE like 8		GO:0005886,GO:0016021,GO:0055085	plasma membrane|integral component of membrane|transmembrane transport
AT1G48630	639.823	887.594	392.053	0.441768	-1.17864	2.47e-13	2.2e-12	Down	5.50502	6.2807	6.70653	17.0339	14.8713	11.8316	RACK1B_AT	Araport:AT1G48630,TAIR:AT1G48630,GeneID:841284	Encodes a protein with similarity to mammalian RACKs. RACKs function to shuttle activated protein kinase C to different subcellular sites and may also function as a scaffold through physical interactions with other proteins. RACK1B has no phenotype on its own and probably acts redundantly with RACK1A and RACK1C.	receptor for activated C kinase 1B		GO:0001934,GO:0003735,GO:0005078,GO:0005080,GO:0005634,GO:0005829,GO:0006417,GO:0007165,GO:0009845,GO:0009967,GO:0019899,GO:0022626,GO:0022627,GO:0042254,GO:0042788,GO:0043022,GO:0048364,GO:0048367,GO:0071215,GO:0072344	positive regulation of protein phosphorylation|structural constituent of ribosome|MAP-kinase scaffold activity|protein kinase C binding|nucleus|cytosol|regulation of translation|signal transduction|seed germination|positive regulation of signal transduction|enzyme binding|cytosolic ribosome|cytosolic small ribosomal subunit|ribosome biogenesis|polysomal ribosome|ribosome binding|root development|…
AT1G49032	1407.97	410.243	2405.7	5.86031	2.55098	1.93e-132	2.74e-130	Up	50.1552	49.956	52.8086	9.3658	8.28168	9.68614	AT1G49032	Araport:AT1G49032,TAIR:AT1G49032,GeneID:6240812		hypothetical protein
AT1G49130	464.514	127.991	801.036	6.26825	2.64806	5.94e-49	1.93e-47	Up	9.78641	10.6562	7.92798	1.26367	1.72256	1.74881	BBX17	Araport:AT1G49130,TAIR:AT1G49130,GeneID:841336		B-box type zinc finger protein with CCT domain-containing protein	CO-like	GO:0005634,GO:0006355,GO:0008270	nucleus|regulation of transcription, DNA-templated|zinc ion binding
AT1G49160	176.159	97.4134	254.905	2.61857	1.38878	1.12e-08	6.88e-08	Up	2.42328	2.48128	1.51447	0.890064	0.867065	0.806898	WNK7	Araport:AT1G49160,TAIR:AT1G49160,GeneID:841339	Encodes a member of the WNK family (9 members in all) of protein kinases, the structural design of which is clearly distinct from those of other known protein kinases, such as receptor-like kinases and mitogen-activated protein kinases. Its	Protein kinase superfamily protein		GO:0004672,GO:0004674,GO:0005524,GO:0005737,GO:0006468,GO:0035556	protein kinase activity|protein serine/threonine kinase activity|ATP binding|cytoplasm|protein phosphorylation|intracellular signal transduction
AT1G49200	104.642	11.4785	197.805	16.8727	4.07662	1.59e-26	2.71e-25	Up	4.61391	4.88322	4.67764	0.473493	0.050881	0.351503	F27J15.33	Araport:AT1G49200,TAIR:AT1G49200,GeneID:841343		RING/U-box superfamily protein		GO:0016021,GO:0016567,GO:0016740,GO:0046872	integral component of membrane|protein ubiquitination|transferase activity|metal ion binding
AT1G49210	39.1692	0.665796	77.6727	120.486	6.91272	3.42e-10	2.4e-09	Up	2.22235	2.28896	1.47478	0.0254584	0.0273573	0	F27J15.3	Araport:AT1G49210,TAIR:AT1G49210,GeneID:841344		RING/U-box superfamily protein		GO:0004842,GO:0016021,GO:0016567,GO:0046872	ubiquitin-protein transferase activity|integral component of membrane|protein ubiquitination|metal ion binding
AT1G49220	30.148	14.7885	45.5076	3.0956	1.63022	0.00613134	0.015737	Up	1.97484	0.737179	1.29167	0.609807	0.592883	0.143714	F27J15.37	Araport:AT1G49220,TAIR:AT1G49220,GeneID:841345		RING/U-box superfamily protein		GO:0016021,GO:0016567,GO:0016740,GO:0046872	integral component of membrane|protein ubiquitination|transferase activity|metal ion binding
AT1G49450	200.998	362.622	39.3738	0.108948	-3.19829	2.77e-28	5.06e-27	Down	0.664219	0.24561	0.349377	3.66239	4.72948	3.67733	F13F21.11	Araport:AT1G49450,TAIR:AT1G49450,GeneID:841369		Transducin/WD40 repeat-like superfamily protein		GO:0005634,GO:0005737,GO:0009846	nucleus|cytoplasm|pollen germination
AT1G49470	188.195	254.395	121.995	0.479532	-1.0603	4.21e-07	2.18e-06	Down	2.16344	1.88791	2.34821	4.24543	4.33864	5.40283	F13F21.10	Araport:AT1G49470,TAIR:AT1G49470,GeneID:841370		transmembrane epididymal protein (DUF716)
AT1G49490	67.1564	39.1842	95.1286	2.42699	1.27917	0.000131206	0.000474083	Up	0.628806	0.663261	0.883093	0.27197	0.300374	0.366411	F13F21.7	Araport:AT1G49490,TAIR:AT1G49490,GeneID:841373		Leucine-rich repeat (LRR) family protein		GO:0005199,GO:0005576,GO:0005618,GO:0009860,GO:0071555	structural constituent of cell wall|extracellular region|cell wall|pollen tube growth|cell wall organization
AT1G49500	1976.7	601.356	3352.05	5.57561	2.47913	1.17e-06	5.75e-06	Up	59.4776	62.1956	36.8019	6.15322	15.49	7.71368	F13F21.6	Araport:AT1G49500,TAIR:AT1G49500,GeneID:841374		transcription initiation factor TFIID subunit 1b-like protein
AT1G49620	43.1011	69.8416	16.3605	0.234083	-2.09491	3.65e-06	1.67e-05	Down	0.375406	0.234724	0.306067	1.44239	0.854472	1.83038	ICK5	Araport:AT1G49620,TAIR:AT1G49620,GeneID:841386	Kip-related protein (KRP) gene, encodes CDK (cyclin-dependent kinase) inhibitor (CKI), negative regulator of cell division. A member of seven KRP genes found in Arabidopsis thaliana. Differential expression patterns for distinct KRPs were revealed by in situ hybridization. Binds to D type cyclins and may inhibit cell cycle.	Cyclin-dependent kinase inhibitor family protein		GO:0001673,GO:0004861,GO:0005654,GO:0007050,GO:0045736	male germ cell nucleus|cyclin-dependent protein serine/threonine kinase inhibitor activity|nucleoplasm|cell cycle arrest|negative regulation of cyclin-dependent protein serine/threonine kinase activity
AT1G50040	865.018	36.4772	1693.56	46.2685	5.53196	3.49e-204	1.12e-201	Up	20.4488	20.976	23.2002	0.416026	0.43351	0.611445	F2J10.8	Araport:AT1G50040,TAIR:AT1G50040,GeneID:841428		formin-like protein, putative (DUF1005)
AT1G50280	407.603	244.167	571.04	2.33549	1.22373	2.37e-11	1.84e-10	Up	6.17895	6.36719	7.01107	2.50058	2.39528	3.89746	F14I3.11	Araport:AT1G50280,TAIR:AT1G50280,GeneID:841450		Phototropic-responsive NPH3 family protein		GO:0009737,GO:0016567,GO:0031463	response to abscisic acid|protein ubiquitination|Cul3-RING ubiquitin ligase complex
AT1G50420	177.657	251.368	103.945	0.413099	-1.27544	3.45e-08	2.01e-07	Down	0.803681	1.16652	0.994557	3.01627	2.18784	2.3138	SCL3	Araport:AT1G50420,TAIR:AT1G50420,GeneID:841464	Encodes a scarecrow-like protein (SCL3) Putative transcription factors interacting with the gene product of VHA-B1 (vacuolar ATPase subunit B1; as shown through yeast two-hybrid assay).	scarecrow-like 3	GRAS	GO:0003700,GO:0003712,GO:0005634,GO:0006355,GO:0009739,GO:0043565	DNA-binding transcription factor activity|transcription coregulator activity|nucleus|regulation of transcription, DNA-templated|response to gibberellin|sequence-specific DNA binding
AT1G50460	1666.26	1079.08	2253.44	2.08993	1.06345	3.65e-17	4.1e-16	Up	19.5877	20.2106	19.2547	9.51451	11.3406	8.61211	HKL1	Araport:AT1G50460,TAIR:AT1G50460,GeneID:841468	Involved in glucose-ethylene crosstalk.	hexokinase-like 1		GO:0001678,GO:0004340,GO:0005524,GO:0005536,GO:0005739,GO:0005829,GO:0006096,GO:0006970,GO:0008865,GO:0009409,GO:0009536,GO:0009651,GO:0019158,GO:0031307,GO:0080147	cellular glucose homeostasis|glucokinase activity|ATP binding|glucose binding|mitochondrion|cytosol|glycolytic process|response to osmotic stress|fructokinase activity|response to cold|plastid|response to salt stress|mannokinase activity|integral component of mitochondrial outer membrane|root hair cell development	path:ath00010,path:ath00051,path:ath00052,path:ath00500,path:ath00520	Glycolysis / Gluconeogenesis|Fructose and mannose metabolism|Galactose metabolism|Starch and sucrose metabolism|Amino sugar and nucleotide sugar metabolism
AT1G50630	350.32	231.915	468.724	2.02107	1.01512	6.46e-11	4.83e-10	Up	5.04167	5.6517	5.00075	2.82088	2.60334	2.70455	F11F12.5	Araport:AT1G50630,TAIR:AT1G50630,GeneID:841485		extracellular ligand-gated ion channel protein (DUF3537)
AT1G51060	919.79	1381.77	457.809	0.331243	-1.59404	7.47e-26	1.24e-24	Down	13.3286	12.5399	10.9712	48.351	31.2487	37.124	HTA10	Araport:AT1G51060,TAIR:AT1G51060,GeneID:841528	Encodes HTA10, a histone H2A protein.	histone H2A 10		GO:0000786,GO:0000790,GO:0003677,GO:0005618,GO:0005730,GO:0006325,GO:0046982	nucleosome|nuclear chromatin|DNA binding|cell wall|nucleolus|chromatin organization|protein heterodimerization activity
AT1G51090	5137.98	7164.31	3111.65	0.434353	-1.20306	1.12e-20	1.5e-19	Down	71.3819	53.0257	78.1971	147.401	158.95	181.96	F23H24.15	Araport:AT1G51090,TAIR:AT1G51090,GeneID:841532		Heavy metal transport/detoxification superfamily protein
AT1G51380	30.7314	42.8798	18.583	0.433719	-1.20517	0.0185639	0.0418928	Down	0.156616	0.326414	0.184166	0.486622	0.701476	0.411179	F11M15.24	Araport:AT1G51380,TAIR:AT1G51380,GeneID:841562		DEA(D/H)-box RNA helicase family protein		GO:0003723,GO:0004386,GO:0005524,GO:0005730,GO:0006364	RNA binding|helicase activity|ATP binding|nucleolus|rRNA processing	path:ath03013,path:ath03015,path:ath03040	RNA transport|mRNA surveillance pathway|Spliceosome
AT1G51440	120.382	197.139	43.6257	0.221201	-2.17657	4.31e-14	4.04e-13	Down	0.37034	0.63919	0.495364	2.30312	2.7322	2.05396	DAD1-Like Lipase 2	Araport:AT1G51440,TAIR:AT1G51440,GeneID:841569	Encodes a lipase that hydrolyzes phosphatidylcholine, glycolipids as well as triacylglycerols.	alpha/beta-Hydrolases superfamily protein		GO:0004620,GO:0004806,GO:0008970,GO:0009507,GO:0016042,GO:0047714	phospholipase activity|triglyceride lipase activity|phospholipase A1 activity|chloroplast|lipid catabolic process|galactolipase activity
AT1G51620	232.279	327.205	137.352	0.419544	-1.25311	1.55e-09	1.03e-08	Down	2.16754	2.51327	1.57118	5.18815	4.76714	5.65629	F19C24.15	Araport:AT1G51620,TAIR:AT1G51620,GeneID:841587		Protein kinase superfamily protein
AT1G51660	1621.59	2359.41	883.771	0.374591	-1.41661	8.64e-34	1.92e-32	Down	9.49946	9.79394	10.299	31.3504	26.7704	24.5162	MKK4	Araport:AT1G51660,TAIR:AT1G51660,GeneID:841591	Encodes a mitogen-activated map kinase kinase (there are nine in Arabidopsis) involved in innate immunity. This protein activates MPK3/MPK6 and early-defense genes redundantly with MKK5. In plants with both MKK5 and MKK6 levels reduced by RNAi plants, floral organs do not abscise suggestion a role for both proteins in mediating floral organ abscission.	mitogen-activated protein kinase kinase 4		GO:0000187,GO:0004674,GO:0004708,GO:0005524,GO:0005634,GO:0005737,GO:0009570,GO:0009626,GO:0009814,GO:0010227,GO:0010229,GO:0023014,GO:0031098,GO:0032147	activation of MAPK activity|protein serine/threonine kinase activity|MAP kinase kinase activity|ATP binding|nucleus|cytoplasm|chloroplast stroma|plant-type hypersensitive response|defense response, incompatible interaction|floral organ abscission|inflorescence development|signal transduction by protein phosphorylation|stress-activated protein kinase signaling cascade|activation of protein kinase …	path:ath04016,path:ath04075,path:ath04626	MAPK signaling pathway - plant|Plant hormone signal transduction|Plant-pathogen interaction
AT1G51680	1904.98	2830.88	979.079	0.345905	-1.53155	2.77e-51	9.41e-50	Down	8.92029	8.99139	7.92743	25.2832	26.6069	26.2166	4CL1	Araport:AT1G51680,TAIR:AT1G51680,GeneID:841593	encodes an isoform of 4-coumarate:CoA ligase (4CL), which is involved in the last step of the general phenylpropanoid pathway. In addition to 4-coumarate, it also converts ferulate. The catalytic efficiency was in the following (descending) order: p-coumaric acid, ferulic acid, caffeic acid and 5-OH-ferulic acid. At4CL1 was unable to use sinapic acid as substrate.	4-coumarate:CoA ligase 1		GO:0005524,GO:0005737,GO:0009698,GO:0016207	ATP binding|cytoplasm|phenylpropanoid metabolic process|4-coumarate-CoA ligase activity	path:ath00130,path:ath00360,path:ath00940	Ubiquinone and other terpenoid-quinone biosynthesis|Phenylalanine metabolism|Phenylpropanoid biosynthesis
AT1G51700	1249.79	1720.38	779.201	0.453105	-1.14208	4.5e-15	4.45e-14	Down	12.6693	14.0419	12.2788	26.8974	35.9919	26.738	DOF1	Araport:AT1G51700,TAIR:AT1G51700,GeneID:841595	Encodes dof zinc finger protein (adof1).	DOF zinc finger protein 1	Dof	GO:0003700,GO:0005634,GO:0006355,GO:0010200,GO:0044212,GO:0046872	DNA-binding transcription factor activity|nucleus|regulation of transcription, DNA-templated|response to chitin|transcription regulatory region DNA binding|metal ion binding
AT1G51760	7383.65	12994.7	1772.64	0.136434	-2.87372	2.4e-176	5.99e-174	Down	23.5465	19.7987	22.5239	162.665	179.731	161.762	IAR3	Araport:AT1G51760,TAIR:AT1G51760,GeneID:841602	encodes a member of the six Arabidopsis IAA-amino acid conjugate hydrolase subfamily and conjugates and conjugates IAA-Ala in vitro. Gene is expressed most strongly in roots, stems, and flowers.	peptidase M20/M25/M40 family protein		GO:0005783,GO:0005788,GO:0005886,GO:0009611,GO:0010179,GO:0046872	endoplasmic reticulum|endoplasmic reticulum lumen|plasma membrane|response to wounding|IAA-Ala conjugate hydrolase activity|metal ion binding
AT1G51780	25.3578	49.3476	1.36797	0.0277188	-5.17299	8.38e-09	5.21e-08	Down	0	0	0.0602739	0.611799	0.704391	0.966026	ILL5	Araport:AT1G51780,TAIR:AT1G51780,GeneID:841604	encodes a member of the six Arabidopsis IAA-amino acid conjugate hydrolase subfamily and conjugates and is very similar to IAR3.	IAA-amino acid hydrolase ILR1-like 5		GO:0005788,GO:0010112,GO:0010178,GO:0046872	endoplasmic reticulum lumen|regulation of systemic acquired resistance|IAA-amino acid conjugate hydrolase activity|metal ion binding
AT1G51790	1107.75	576.009	1639.5	2.84943	1.51067	7.06e-34	1.57e-32	Up	9.78156	8.76956	8.82736	3.38687	3.65135	2.99749	F19C24.24	Araport:AT1G51790,TAIR:AT1G51790,GeneID:841605		Leucine-rich repeat protein kinase family protein		GO:0002229,GO:0002237,GO:0002238,GO:0002239,GO:0004674,GO:0005524,GO:0005886,GO:0009620,GO:0009738,GO:0009788,GO:0010200,GO:0016021,GO:0042802,GO:0042803,GO:0090406,GO:1900150,GO:1900426,GO:1902289,GO:2000071	defense response to oomycetes|response to molecule of bacterial origin|response to molecule of fungal origin|response to oomycetes|protein serine/threonine kinase activity|ATP binding|plasma membrane|response to fungus|abscisic acid-activated signaling pathway|negative regulation of abscisic acid-activated signaling pathway|response to chitin|integral component of membrane|identical protein bindi…
AT1G51800	404.088	667.235	140.941	0.211481	-2.2414	1.94e-35	4.52e-34	Down	1.27501	0.95571	0.904252	4.92896	5.71496	4.83514	IOS1	Araport:AT1G51800,TAIR:AT1G51800,GeneID:841606	The gene encodes a putative member of the LRR-RLK protein family. Expressin and mutant analysis revealed that it contributes to the interaction between Arabidopsis and Hyaloperonospora arabidopsidis. and	Leucine-rich repeat protein kinase family protein		GO:0002229,GO:0002237,GO:0002238,GO:0002239,GO:0004674,GO:0005524,GO:0005886,GO:0009620,GO:0009738,GO:0009788,GO:0010200,GO:0016021,GO:0042802,GO:0042803,GO:0090406,GO:1900150,GO:1900426,GO:1902289,GO:2000071	defense response to oomycetes|response to molecule of bacterial origin|response to molecule of fungal origin|response to oomycetes|protein serine/threonine kinase activity|ATP binding|plasma membrane|response to fungus|abscisic acid-activated signaling pathway|negative regulation of abscisic acid-activated signaling pathway|response to chitin|integral component of membrane|identical protein bindi…
AT1G51850	73.941	23.7381	124.144	5.28466	2.40181	6.1e-08	3.46e-07	Up	1.13377	1.10165	0.601143	0.0905645	0.332509	0.134463	T14L22.6	Araport:AT1G51850,TAIR:AT1G51850,GeneID:841612		Leucine-rich repeat protein kinase family protein
AT1G51860	32.8845	44.9045	20.8646	0.463943	-1.10798	0.017562	0.0399569	Down	0.140646	0.139237	0.157669	0.443398	0.238235	0.308589	T14L22.7	Araport:AT1G51860,TAIR:AT1G51860,GeneID:841613		Leucine-rich repeat protein kinase family protein
AT1G51890	201.761	350.615	52.9078	0.150984	-2.72753	1.49e-26	2.55e-25	Down	0.48135	0.381505	0.207276	2.37776	2.28238	2.77005	T14L22.10	Araport:AT1G51890,TAIR:AT1G51890,GeneID:841616		Leucine-rich repeat protein kinase family protein
AT1G51920	6.42526	12.5002	0.350302	0.0294083	-5.08763	0.000969718	0.00298611	Down	0	0.074888	0	0.495589	0.912951	1.40155	T14L22.80	Araport:AT1G51920,TAIR:AT1G51920,GeneID:841620		transmembrane protein
AT1G51940	4969.51	2071.92	7867.1	3.79764	1.9251	1.94e-113	2.02e-111	Up	71.8375	69.2612	75.146	20.6852	19.574	19.3151	LYK3	Araport:AT1G51940,TAIR:AT1G51940,GeneID:841622	Encodes a LysM-containing receptor-like kinase. Induction of chitin-responsive genes by chitin treatment is not blocked in the mutant.	protein kinase family protein / peptidoglycan-binding LysM domain-containing protein		GO:0004674,GO:0005524,GO:0005886,GO:0006952,GO:0009737,GO:0009738,GO:0009789,GO:0016021,GO:0031348,GO:0045087,GO:0050832	protein serine/threonine kinase activity|ATP binding|plasma membrane|defense response|response to abscisic acid|abscisic acid-activated signaling pathway|positive regulation of abscisic acid-activated signaling pathway|integral component of membrane|negative regulation of defense response|innate immune response|defense response to fungus
AT1G52030	69.9535	21.2126	118.694	5.57857	2.4799	6.02e-06	2.68e-05	Up	1.03505	0.387989	1.2142	0.359465	0.0788321	0.0580906	MBP2	Araport:AT1G52030,TAIR:AT1G52030,GeneID:841632	Similar to myrosinase binding proteins which may be involved in metabolizing glucosinolates and forming defense compounds to protect against herbivory. Also similar to lectins and other agglutinating factors. Expressed only in flowers.	myrosinase-binding protein 2		GO:0006952,GO:0007155,GO:0009611,GO:0009908,GO:0010169,GO:0010180,GO:0030246	defense response|cell adhesion|response to wounding|flower development|thioglucosidase complex|thioglucosidase binding|carbohydrate binding
AT1G52040	2914.33	1605.23	4223.44	2.6321	1.39621	7.5e-26	1.25e-24	Up	59.5724	43.7171	59.5784	19.6651	23.8965	21.0155	MBP1	Araport:AT1G52040,TAIR:AT1G52040,GeneID:841633	Encodes myrosinase-binding protein expressed in flowers.	myrosinase-binding protein 1		GO:0005634,GO:0005773,GO:0006952,GO:0030246	nucleus|vacuole|defense response|carbohydrate binding
AT1G52200	1677.28	621.436	2733.12	4.39754	2.1367	2.35e-109	2.28e-107	Up	34.9753	34.3743	33.2703	8.4716	7.66399	8.29939	F9I5.19	Araport:AT1G52200,TAIR:AT1G52200,GeneID:841650		PLAC8 family protein		GO:0005886,GO:0006979,GO:0016021	plasma membrane|response to oxidative stress|integral component of membrane
AT1G52240	16.2306	31.7926	0.668497	0.0211742	-5.56155	0.0198529	0.0443863	Down	0.0216208	0	0	1.04372	0.0228892	0.0210835	ROPGEF11	Araport:AT1G52240,TAIR:AT1G52240,GeneID:841654	Encodes a member of KPP-like gene family, homolog of KPP (kinase partner protein) gene in tomato. Also a member of the RopGEF (guanine nucleotide exchange factor) family, containing the novel PRONE domain (plant-specific Rop nucleotide exchanger), which is exclusively active towards members of the Rop subfamily .	rop guanine nucleotide exchange factor-like protein		GO:0005089,GO:0005634,GO:0005737,GO:0048364,GO:0080147	Rho guanyl-nucleotide exchange factor activity|nucleus|cytoplasm|root development|root hair cell development
AT1G52565	13.5552	24.0313	3.07906	0.128517	-2.95997	0.00194863	0.00561471	Down	0.0419982	0.0437657	0.107003	0.0827515	0.9337	0.532407	AT1G52565	Araport:AT1G52565,TAIR:AT1G52565,GeneID:841688		cytochrome P450 family protein
AT1G52690	4.1254	8.25079	0	0.0228501	-5.45165	0.0016017	0.00470339	Down	0	0	0	0.345377	0.13255	0.17093	LEA7	Araport:AT1G52690,TAIR:AT1G52690,GeneID:841701		Late embryogenesis abundant protein (LEA) family protein
AT1G52700	55.151	75.996	34.3059	0.45114	-1.14835	0.00127001	0.00381686	Down	0.330199	0.484284	0.43622	0.951821	0.958081	0.989831	F6D8.5	Araport:AT1G52700,TAIR:AT1G52700,GeneID:841703		alpha/beta-Hydrolases superfamily protein		GO:0002084,GO:0005634,GO:0005737,GO:0005829,GO:0006631,GO:0008474,GO:0052689	protein depalmitoylation|nucleus|cytoplasm|cytosol|fatty acid metabolic process|palmitoyl-(protein) hydrolase activity|carboxylic ester hydrolase activity
AT1G52720	1916.3	3343.93	488.675	0.146152	-2.77446	1.19e-129	1.62e-127	Down	15.2291	14.6705	13.114	114.357	99.2968	94.2552	F6D8.3	Araport:AT1G52720,TAIR:AT1G52720,GeneID:841705		hypothetical protein
AT1G52750	19.4671	2.60395	36.3303	14.0602	3.81355	4.52e-07	2.33e-06	Up	0.355807	0.440929	0.245007	0.0284216	0.0305416	0.0187548	F14G24.2	Araport:AT1G52750,TAIR:AT1G52750,GeneID:841708		alpha/beta-Hydrolases superfamily protein
AT1G52770	271.591	436.004	107.177	0.245941	-2.02362	1.55e-17	1.78e-16	Down	1.49061	1.65865	0.888291	5.37626	6.82038	4.90269	F14G24.4	Araport:AT1G52770,TAIR:AT1G52770,GeneID:841710		Phototropic-responsive NPH3 family protein		GO:0005886,GO:0007165,GO:0009638,GO:0016567	plasma membrane|signal transduction|phototropism|protein ubiquitination
AT1G52855	43.669	76.316	11.0219	0.143735	-2.79851	1.95e-08	1.17e-07	Down	0.171276	0.446212	0.32001	2.39045	1.32971	3.14554	AT1G52855	Araport:AT1G52855,TAIR:AT1G52855,GeneID:2745824		hypothetical protein
AT1G52890	498.487	936.659	60.3161	0.0642054	-3.96116	3.55e-70	1.9e-68	Down	0.548877	1.50794	0.932285	17.271	15.3017	16.0733	NAC019	Araport:AT1G52890,TAIR:AT1G52890,GeneID:841722	encodes a NAC transcription factor whose expression is induced by drought, high salt, and abscisic acid. This gene binds to ERD1 promoter in vitro.	NAC domain containing protein 19	NAC	GO:0003677,GO:0003700,GO:0005634,GO:0009414,GO:0045893	DNA binding|DNA-binding transcription factor activity|nucleus|response to water deprivation|positive regulation of transcription, DNA-templated
AT1G52910	35.6408	48.3074	22.9741	0.475418	-1.07273	0.0226338	0.0497579	Down	0.520706	0.713974	0.64238	0.836982	1.45066	1.84399	F14G24.18	Araport:AT1G52910,TAIR:AT1G52910,GeneID:841724		fiber (DUF1218)
AT1G53035	505.37	796.75	213.99	0.268761	-1.89561	7.22e-20	9.34e-19	Down	6.1961	2.86713	5.22035	19.2163	16.7186	19.7841	AT1G53035	Araport:AT1G53035,TAIR:AT1G53035,GeneID:841737		transmembrane protein
AT1G53070	138.516	186.11	90.9212	0.488033	-1.03495	2e-05	8.22e-05	Down	1.5493	1.39924	1.71927	3.57842	2.60608	3.86092	F8L10.7	Araport:AT1G53070,TAIR:AT1G53070,GeneID:841741		Legume lectin family protein		GO:0005618,GO:0005829,GO:0009505,GO:0030246,GO:0048046,GO:0080167	cell wall|cytosol|plant-type cell wall|carbohydrate binding|apoplast|response to karrikin
AT1G53080	5.95457	10.8748	1.03429	0.0943599	-3.40568	0.0123411	0.0292855	Down	0	0.02215	0.0433236	0.146583	0.0900092	0.497452	F8L10.6	Araport:AT1G53080,TAIR:AT1G53080,GeneID:841742		Legume lectin family protein		GO:0009505,GO:0030246,GO:0048046	plant-type cell wall|carbohydrate binding|apoplast
AT1G53160	1246.37	435.798	2056.94	4.7187	2.23839	1.71e-64	7.96e-63	Up	33.4829	30.7962	37.4526	6.5189	7.11048	8.95914	SPL4	Araport:AT1G53160,TAIR:AT1G53160,GeneID:841749	Encodes a member of the SPL (squamosa-promoter binding protein-like)gene family, a novel gene family encoding DNA binding proteins and putative transcription factors. Contains the SBP-box, which encodes the SBP-domain, required and sufficient for interaction with DNA. It is involved in regulation of flowering and vegetative phase change. Its temporal expression is regulated by the microRNA miR156…	squamosa promoter binding protein-like 4	SBP	GO:0003677,GO:0003700,GO:0005634,GO:0005737,GO:0006355,GO:0009908,GO:0010321,GO:0046872	DNA binding|DNA-binding transcription factor activity|nucleus|cytoplasm|regulation of transcription, DNA-templated|flower development|regulation of vegetative phase change|metal ion binding
AT1G53163	18.6707	4.67007	32.6713	6.89393	2.78533	0.000182642	0.000642851	Up	0.526442	0.940454	0.364059	0.166706	0.0199045	0.0916712	AT1G53163	Araport:AT1G53163,TAIR:AT1G53163,GeneID:5007796		membrane-associated kinase regulator
AT1G53340	127.942	10.2766	245.608	23.8789	4.57766	1.79e-40	4.84e-39	Up	2.3515	2.35582	2.68445	0.139198	0.096159	0.0885732	F12M16.24	Araport:AT1G53340,TAIR:AT1G53340,GeneID:841769		Cysteine/Histidine-rich C1 domain family protein
AT1G53345	89.9712	38.1772	141.765	3.6928	1.88472	2.02e-08	1.21e-07	Up	1.91609	2.24412	3.00685	0.751737	0.394928	0.892898	AT1G53345	Araport:AT1G53345,TAIR:AT1G53345,GeneID:841770		DHHA1 domain protein
AT1G53430	5844.11	2829.93	8858.28	3.13089	1.64657	3.56e-68	1.79e-66	Up	46.0614	49.886	48.4856	14.7276	16.8855	16.6091	T3F20.25	Araport:AT1G53430,TAIR:AT1G53430,GeneID:841778		Leucine-rich repeat transmembrane protein kinase
AT1G53500	1948.45	2617.08	1279.81	0.488951	-1.03224	1.05e-27	1.86e-26	Down	10.6733	11.991	11.5349	24.8619	23.0447	25.3428	MUM4	Araport:AT1G53500,TAIR:AT1G53500,GeneID:841785	encodes a putative NDP-L-rhamnose synthase, an enzyme required for the synthesis of the pectin rhamnogalacturonan I, the major component of Arabidopsis mucilage. Gene is involved in seed coat mucilage cell development. Mutant analyses suggest that MUM4 is required for complete mucilage synthesis, cytoplasmic rearrangement and seed coat development.	NAD-dependent epimerase/dehydratase family protein		GO:0005829,GO:0008460,GO:0010192,GO:0010214,GO:0010253,GO:0010280,GO:0010489,GO:0010490,GO:0050377	cytosol|dTDP-glucose 4,6-dehydratase activity|mucilage biosynthetic process|seed coat development|UDP-rhamnose biosynthetic process|UDP-L-rhamnose synthase activity|UDP-4-keto-6-deoxy-glucose-3,5-epimerase activity|UDP-4-keto-rhamnose-4-keto-reductase activity|UDP-glucose 4,6-dehydratase activity	path:ath00520	Amino sugar and nucleotide sugar metabolism
AT1G53620	4.4485	8.89699	0	0.0212719	-5.55491	0.00107849	0.00328756	Down	0	0	0	0.204977	0.572692	0.365202	F22G10.5	Araport:AT1G53620,TAIR:AT1G53620,GeneID:841797		transmembrane protein
AT1G53625	61.9709	113.953	9.98879	0.0872988	-3.51789	5.29e-16	5.55e-15	Down	0.274388	0.571872	0.174771	4.52788	3.70368	3.98008	AT1G53625	Araport:AT1G53625,TAIR:AT1G53625,GeneID:841798		hypothetical protein
AT1G53730	1999.38	881.181	3117.59	3.54028	1.82386	8.01e-56	3.07e-54	Up	23.8396	26.9913	25.2209	7.8825	7.98543	6.57366	SRF6	Araport:AT1G53730,TAIR:AT1G53730,GeneID:841811		STRUBBELIG-receptor family 6
AT1G53840	4172.47	6072.29	2272.65	0.374307	-1.4177	2.79e-40	7.46e-39	Down	21.6307	23.3249	23.9296	59.1636	70.6789	62.2485	PME1	Araport:AT1G53840,TAIR:AT1G53840,GeneID:841821	encodes a pectin methylesterase	pectin methylesterase 1		GO:0000139,GO:0005576,GO:0005618,GO:0005768,GO:0005774,GO:0005794,GO:0005802,GO:0005886,GO:0009506,GO:0016020,GO:0030599,GO:0042545,GO:0045330,GO:0045490,GO:0046910,GO:0051722	Golgi membrane|extracellular region|cell wall|endosome|vacuolar membrane|Golgi apparatus|trans-Golgi network|plasma membrane|plasmodesma|membrane|pectinesterase activity|cell wall modification|aspartyl esterase activity|pectin catabolic process|pectinesterase inhibitor activity|protein C-terminal methylesterase activity
AT1G53885	31.6181	45.184	18.0521	0.400166	-1.32133	0.0121876	0.0289687	Down	0.439303	0.188502	0.763727	1.17108	1.25843	1.20956	AT1G53885	Araport:AT1G53885,TAIR:AT1G53885,GeneID:841826		linoleate 9S-lipoxygenase-4 protein, putative (DUF581)		GO:0005634,GO:0005737,GO:0009737,GO:0009744,GO:0009749,GO:0042594,GO:0046872,GO:1902074,GO:1905582	nucleus|cytoplasm|response to abscisic acid|response to sucrose|response to glucose|response to starvation|metal ion binding|response to salt|response to mannose
AT1G54000	29.2488	54.6858	3.81178	0.0692396	-3.85226	7.15e-09	4.49e-08	Down	0	0.0820512	0.0668691	0.646421	0.903027	0.678229	GLL22	Araport:AT1G54000,TAIR:AT1G54000,GeneID:841838		GDSL-like Lipase/Acylhydrolase superfamily protein		GO:0000325,GO:0005576,GO:0005773,GO:0005774,GO:0009505,GO:0009506,GO:0016042,GO:0016788	plant-type vacuole|extracellular region|vacuole|vacuolar membrane|plant-type cell wall|plasmodesma|lipid catabolic process|hydrolase activity, acting on ester bonds
AT1G54010	222.806	385.133	60.4792	0.157186	-2.66945	5.72e-36	1.36e-34	Down	0.982942	0.85614	0.807369	5.26102	6.27469	6.06582	F15I1.9	Araport:AT1G54010,TAIR:AT1G54010,GeneID:841839		GDSL-like Lipase/Acylhydrolase superfamily protein		GO:0005773,GO:0005774,GO:0005783,GO:0009506,GO:0016020,GO:0016788	vacuole|vacuolar membrane|endoplasmic reticulum|plasmodesma|membrane|hydrolase activity, acting on ester bonds
AT1G54740	1319.65	214.271	2425.02	11.3062	3.49904	5.22e-112	5.27e-110	Up	40.702	55.3526	38.3171	4.87045	3.5613	4.02342	T22H22.16	Araport:AT1G54740,TAIR:AT1G54740,GeneID:841915		FANTASTIC four-like protein (DUF3049)
AT1G54790	14.8292	22.8711	6.78734	0.297087	-1.75104	0.0158541	0.0365681	Down	0.118456	0.0370325	0.0845049	0.396783	0.188108	0.265679	T22H22.20	Araport:AT1G54790,TAIR:AT1G54790,GeneID:841920		GDSL-like Lipase/Acylhydrolase superfamily protein		GO:0005576,GO:0016042,GO:0016788	extracellular region|lipid catabolic process|hydrolase activity, acting on ester bonds
AT1G55210	2538.83	3963.33	1114.33	0.281206	-1.8303	1.48e-50	4.94e-49	Down	27.1425	21.9943	23.5602	76.9456	90.4185	103.185	F7A10.7	Araport:AT1G55210,TAIR:AT1G55210,GeneID:841964		Disease resistance-responsive (dirigent-like protein) family protein		GO:0048046	apoplast
AT1G55265	561.241	761.088	361.394	0.474858	-1.07443	2e-10	1.43e-09	Down	12.3801	10.246	12.5835	20.9821	24.4145	32.3312	AT1G55265	Araport:AT1G55265,TAIR:AT1G55265,GeneID:841971		DUF538 family protein, putative (Protein of unknown function, DUF538)
AT1G55330	2881.85	1117.4	4646.31	4.16071	2.05683	1.07e-46	3.32e-45	Up	217.358	261.089	255.983	48.259	73.298	62.5011	AGP21	Araport:AT1G55330,TAIR:AT1G55330,GeneID:841979	Encodes a putative arabinogalactan-protein (AGP21).	arabinogalactan protein 21
AT1G55380	45.9229	25.0774	66.7684	2.68529	1.42508	0.00330205	0.00903016	Up	0.570229	0.661499	0.910074	0.158994	0.489778	0.178358	T18I3.4	Araport:AT1G55380,TAIR:AT1G55380,GeneID:841985		Cysteine/Histidine-rich C1 domain family protein
AT1G55390	45.7637	0.354812	91.1726	263.279	8.04045	8.12e-11	6.01e-10	Up	1.05799	0.852891	0.803579	0	0.0105666	0	T18I3.3	Araport:AT1G55390,TAIR:AT1G55390,GeneID:841986		Cysteine/Histidine-rich C1 domain family protein
AT1G55673	456.39	852.778	60.001	0.0703612	-3.82908	0.00668957	0.016989	Down	3.59168	2.3639	2.50445	119.609	4.0025	3.87109	AT1G55673	Araport:AT1G55673,GeneID:28717360		hypothetical protein		GO:0009507,GO:0009534,GO:0009535,GO:0009579,GO:0009773,GO:0009780,GO:0009941,GO:0015979,GO:0016021,GO:0030093,GO:0031969,GO:0042550,GO:0050821	chloroplast|chloroplast thylakoid|chloroplast thylakoid membrane|thylakoid|photosynthetic electron transport in photosystem I|photosynthetic NADP+ reduction|chloroplast envelope|photosynthesis|integral component of membrane|chloroplast photosystem I|chloroplast membrane|photosystem I stabilization|protein stabilization
AT1G55775	5.02053	9.69075	0.350302	0.0379655	-4.71917	0.00313266	0.00861695	Down	0	0.0331782	0	0.313664	0.33706	0.31047	AT1G55775	Araport:AT1G55775,GeneID:28717362		heavy metal-associated domain protein		GO:0005737,GO:0046872,GO:0070042,GO:0070475	cytoplasm|metal ion binding|rRNA (uridine-N3-)-methyltransferase activity|rRNA base methylation
AT1G55850	2943.05	1880.9	4005.2	2.12846	1.08981	2.96e-25	4.8e-24	Up	34.669	36.8257	33.7071	18.3532	14.2764	19.2571	CSLE1	Araport:AT1G55850,TAIR:AT1G55850,GeneID:842035	encodes a protein similar to cellulose synthase	cellulose synthase like E1		GO:0000139,GO:0005783,GO:0005794,GO:0005802,GO:0005886,GO:0009833,GO:0016021,GO:0016759,GO:0016760,GO:0030244,GO:0071555	Golgi membrane|endoplasmic reticulum|Golgi apparatus|trans-Golgi network|plasma membrane|plant-type primary cell wall biogenesis|integral component of membrane|cellulose synthase activity|cellulose synthase (UDP-forming) activity|cellulose biosynthetic process|cell wall organization
AT1G55910	619.493	871.911	367.074	0.421013	-1.24806	3.42e-16	3.63e-15	Down	6.29427	5.6602	5.53546	17.6114	13.0902	12.8053	ZIP11	Araport:AT1G55910,TAIR:AT1G55910,GeneID:842041	member of Putative zinc transporter ZIP2 - like family	zinc transporter 11 precursor		GO:0005385,GO:0005886,GO:0016021,GO:0071577	zinc ion transmembrane transporter activity|plasma membrane|integral component of membrane|zinc ion transmembrane transport
AT1G56060	88.5288	173.571	3.48697	0.0199834	-5.64506	6.2e-07	3.15e-06	Down	0.0410091	0.384615	0	8.12066	7.20685	6.87826	T6H22.17	Araport:AT1G56060,TAIR:AT1G56060,GeneID:842057		cysteine-rich/transmembrane domain protein B
AT1G56220	17935.6	9402.69	26468.4	2.81508	1.49318	1.76e-65	8.44e-64	Up	305.956	331.226	316.733	108.483	119.121	126.919	F14G9.17	Araport:AT1G56220,TAIR:AT1G56220,GeneID:842075		Dormancy/auxin associated family protein
AT1G56600	1317.53	2449.63	185.44	0.0757564	-3.72249	2.6e-107	2.45e-105	Down	3.32851	2.03841	3.36	35.5736	35.8723	49.4867	GolS2	Araport:AT1G56600,TAIR:AT1G56600,GeneID:842114	GolS2 is a galactinol synthase that catalyzes the formation of galactinol from UDP-galactose and myo-inositol. GolS2 transcript levels rise in response to methyl viologen, an oxidative damage-inducing agent. Plants over-expressing GolS2 have increased tolerance to salt, chilling, and high-light stress.	galactinol synthase 2		GO:0005737,GO:0006012,GO:0006979,GO:0009409,GO:0009414,GO:0009651,GO:0009737,GO:0046872,GO:0047216	cytoplasm|galactose metabolic process|response to oxidative stress|response to cold|response to water deprivation|response to salt stress|response to abscisic acid|metal ion binding|inositol 3-alpha-galactosyltransferase activity	path:ath00052	Galactose metabolism
AT1G56650	593.497	1039.39	147.608	0.142047	-2.81556	2.41e-41	6.62e-40	Down	2.71481	2.29729	3.97325	16.51	21.9121	27.8468	PAP1	Araport:AT1G56650,TAIR:AT1G56650,GeneID:842120	Encodes a putative MYB domain containing transcription factor involved in anthocyanin metabolism and radical scavenging. Essential for the sucrose-mediated expression of the dihydroflavonol reductase gene. Auxin and ethylene responsiveness of PAP1 transcription is lost in myb12 mutants.	production of anthocyanin pigment 1	MYB	GO:0002239,GO:0003700,GO:0005634,GO:0009651,GO:0009718,GO:0009723,GO:0009733,GO:0009745,GO:0009753,GO:0009867,GO:0019430,GO:0030154,GO:0031540,GO:0031542,GO:0043565,GO:0044212	response to oomycetes|DNA-binding transcription factor activity|nucleus|response to salt stress|anthocyanin-containing compound biosynthetic process|response to ethylene|response to auxin|sucrose mediated signaling|response to jasmonic acid|jasmonic acid mediated signaling pathway|removal of superoxide radicals|cell differentiation|regulation of anthocyanin biosynthetic process|positive regulatio…	path:ath04712	Circadian rhythm - plant
AT1G56660	3919.66	7515.05	324.267	0.0431362	-4.53496	1.45e-202	4.59e-200	Down	3.04617	3.86401	2.4994	66.1088	87.5659	73.7016	F25P12.91	Araport:AT1G56660,TAIR:AT1G56660,GeneID:842121		MAEBL domain protein
AT1G56720	593.642	161.447	1025.84	6.34994	2.66674	1.28e-63	5.9e-62	Up	7.5908	9.40061	8.89159	1.70909	1.27216	1.28733	F25P12.84	Araport:AT1G56720,TAIR:AT1G56720,GeneID:842128		Protein kinase superfamily protein
AT1G57560	62.3942	88.2167	36.5717	0.414008	-1.27227	0.00203576	0.00583753	Down	0.400809	1.08959	0.408473	1.63098	1.67884	1.47843	MYB50	Araport:AT1G57560,TAIR:AT1G57560,GeneID:842131	Member of the R2R3 factor gene family.	myb domain protein 50	MYB	GO:0003700,GO:0005634,GO:0009733,GO:0010087,GO:0010089,GO:0010119,GO:0010214,GO:0030154,GO:0043565,GO:0044212,GO:0048364	DNA-binding transcription factor activity|nucleus|response to auxin|phloem or xylem histogenesis|xylem development|regulation of stomatal movement|seed coat development|cell differentiation|sequence-specific DNA binding|transcription regulatory region DNA binding|root development
AT1G57630	363.194	677.779	48.6096	0.0714879	-3.80616	3.61e-54	1.32e-52	Down	0.825473	2.34905	1.42366	20.7376	20.5702	25.9754	T8L23.10	Araport:AT1G57630,TAIR:AT1G57630,GeneID:842139		Toll-Interleukin-Resistance (TIR) domain family protein		GO:0000139,GO:0002239,GO:0005524,GO:0005789,GO:0005886,GO:0006952,GO:0007165,GO:0009817,GO:0030275,GO:0043531	Golgi membrane|response to oomycetes|ATP binding|endoplasmic reticulum membrane|plasma membrane|defense response|signal transduction|defense response to fungus, incompatible interaction|LRR domain binding|ADP binding
AT1G57650	16.0565	31.7787	0.334249	0.0115693	-6.43355	1.39e-06	6.74e-06	Down	0.00893331	0	0	0.237625	0.283721	0.365874	T8L23.12	Araport:AT1G57650,TAIR:AT1G57650,GeneID:842141		ATP binding protein		GO:0005524,GO:0007165,GO:0009816,GO:0042742,GO:0043531	ATP binding|signal transduction|defense response to bacterium, incompatible interaction|defense response to bacterium|ADP binding
AT1G57680	7975.98	3264.72	12687.2	3.88613	1.95833	7.95e-112	7.94e-110	Up	128.259	131.18	129.862	38.7337	32.8647	33.2822	Cand1	Araport:AT1G57680,TAIR:AT1G57680,GeneID:842144		plasminogen activator inhibitor
AT1G57850	63.9902	94.3878	33.5927	0.355287	-1.49294	2.85e-05	0.000114338	Down	0.785366	0.986917	0.541435	2.52599	1.78514	2.52279	F12K22.22	Araport:AT1G57850,TAIR:AT1G57850,GeneID:842160		Toll-Interleukin-Resistance (TIR) domain family protein		GO:0005524,GO:0007165,GO:0009615,GO:0009626,GO:0043531,GO:0051607	ATP binding|signal transduction|response to virus|plant-type hypersensitive response|ADP binding|defense response to virus
AT1G57943	42.1924	22.9693	61.4155	2.66849	1.41603	0.000735964	0.00232388	Up	1.17377	0.838745	1.0595	0.330393	0.337285	0.539597	PUP17	Araport:AT1G57943,TAIR:AT1G57943,GeneID:842164	Member of a family of proteins related to PUP1, a purine transporter. May be involved in the transport of purine and purine derivatives such as cytokinins, across the plasma membrane.	purine permease 17		GO:0005345,GO:0006863,GO:0016020,GO:0016021	purine nucleobase transmembrane transporter activity|purine nucleobase transport|membrane|integral component of membrane
AT1G57980	722.947	247.521	1198.37	4.83741	2.27424	3.13e-69	1.64e-67	Up	16.4405	17.2858	18.8699	3.95859	3.41244	4.01875	F13D13.2	Araport:AT1G57980,TAIR:AT1G57980,GeneID:842165		Nucleotide-sugar transporter family protein		GO:0005215,GO:0016021	transporter activity|integral component of membrane
AT1G57990	8946.21	2821.95	15070.5	5.34196	2.41737	1.11e-95	8.72e-94	Up	188.491	193.326	165.748	37.1852	39.4042	30.3434	PUP18	Araport:AT1G57990,TAIR:AT1G57990,GeneID:842166	Member of a family of proteins related to PUP1, a purine transporter. May be involved in the transport of purine and purine derivatives such as cytokinins, across the plasma membrane.	purine permease 18		GO:0005345,GO:0005886,GO:0006863,GO:0016020,GO:0016021	purine nucleobase transmembrane transporter activity|plasma membrane|purine nucleobase transport|membrane|integral component of membrane
AT1G58100	1593.49	1024.53	2162.46	2.1104	1.07752	8.77e-29	1.63e-27	Up	25.9997	27.3986	25.1682	12.9512	12.2791	13.7579	TCP8	Araport:AT1G58100,TAIR:AT1G58100,GeneID:842177	Encodes TCP8, belongs to the TCP transcription factor family known to bind site II elements in promoter regions.	TCP family transcription factor	TCP	GO:0000978,GO:0003700,GO:0005634,GO:0006355,GO:0043565,GO:0044212	RNA polymerase II proximal promoter sequence-specific DNA binding|DNA-binding transcription factor activity|nucleus|regulation of transcription, DNA-templated|sequence-specific DNA binding|transcription regulatory region DNA binding
AT1G58180	2358.36	851.826	3864.9	4.53543	2.18124	2.23e-78	1.37e-76	Up	45.3313	43.5879	43.059	8.91158	9.249	12.3492	BCA6	Araport:AT1G58180,TAIR:AT1G58180,GeneID:842185		beta carbonic anhydrase 6		GO:0004089,GO:0005737,GO:0005739,GO:0008270,GO:0010037,GO:0010119,GO:0015976	carbonate dehydratase activity|cytoplasm|mitochondrion|zinc ion binding|response to carbon dioxide|regulation of stomatal movement|carbon utilization	path:ath00910	Nitrogen metabolism
AT1G58190	93.9332	37.0939	150.773	4.06711	2.024	3.67e-07	1.91e-06	Up	0.602697	0.564508	0.446041	0.236799	0.125332	0.0524748	RLP9	Araport:AT1G58190,TAIR:AT1G58190,GeneID:842186		receptor like protein 9		GO:0005886,GO:0016021	plasma membrane|integral component of membrane
AT1G58420	409.674	789.018	30.3305	0.0383008	-4.70648	1.9e-76	1.14e-74	Down	0.452264	1.14104	0.557945	17.3769	22.957	18.0124	F9K23.5	Araport:AT1G58420,TAIR:AT1G58420,GeneID:842211		Uncharacterized conserved protein UCP031279
AT1G58520	772.69	1201.84	343.544	0.285884	-1.8065	2.61e-40	7.01e-39	Down	2.45731	1.96111	2.51809	9.25006	7.48905	8.70038	RXW8	Araport:AT1G58520,TAIR:AT1G58520,GeneID:842218		GDSL-like lipase/acylhydrolase superfamily protein		GO:0005227,GO:0005886,GO:0016021	calcium activated cation channel activity|plasma membrane|integral component of membrane
AT1G59640	160.726	243.652	77.8003	0.319388	-1.64662	1.25e-12	1.06e-11	Down	1.0855	0.788019	0.9571	2.93188	2.75029	3.61564	BPEp	Araport:AT1G59640,TAIR:AT1G59640,GeneID:842254	A basic helix-loop-helix encoding gene (BIGPETAL, BPE) involved in the control of petal size. BPE is expressed via two mRNAs derived from an alternative splicing event. The BPEub (AT1G59640.1)transcript is expressed ubiquitously, whereas the BPEp (AT1G59640.2) transcript is preferentially expressed in petals. Plants that lack the petal-expressed variant BPEp have larger petals as a result of incr…	transcription factor BIG PETAL P (BPE)	bHLH	GO:0003700,GO:0005634,GO:0006355,GO:0043565,GO:0046983,GO:0048446	DNA-binding transcription factor activity|nucleus|regulation of transcription, DNA-templated|sequence-specific DNA binding|protein dimerization activity|petal morphogenesis
AT1G59710	3339.99	1240.32	5439.65	4.38595	2.13289	3.09e-135	4.64e-133	Up	65.8692	68.707	69.8774	15.8942	15.7987	17.1089	F23H11.2	Araport:AT1G59710,TAIR:AT1G59710,GeneID:842262		actin cross-linking protein (DUF569)
AT1G59860	146.898	91.2566	202.538	2.21857	1.14963	6.95e-07	3.51e-06	Up	4.26314	5.45577	5.33553	2.2105	2.26981	2.62559	F23H11.18	Araport:AT1G59860,TAIR:AT1G59860,GeneID:842280		HSP20-like chaperones superfamily protein		GO:0000302,GO:0005737,GO:0006457,GO:0006970,GO:0009408,GO:0009651,GO:0042542,GO:0043621,GO:0051082,GO:0051259	response to reactive oxygen species|cytoplasm|protein folding|response to osmotic stress|response to heat|response to salt stress|response to hydrogen peroxide|protein self-association|unfolded protein binding|protein complex oligomerization	path:ath04141	Protein processing in endoplasmic reticulum
AT1G59865	25.313	45.931	4.69497	0.103053	-3.27854	9.84e-06	4.25e-05	Down	0.365604	0	0.0620991	1.1706	1.22566	1.99056	AT1G59865	Araport:AT1G59865,TAIR:AT1G59865,GeneID:2745837		transmembrane protein
AT1G60060	170.133	81.2388	259.027	3.18339	1.67056	1.15e-12	9.76e-12	Up	3.36594	4.13987	3.65113	1.01047	1.08584	1.57775	T2K10.11	Araport:AT1G60060,TAIR:AT1G60060,GeneID:842300		Serine/threonine-protein kinase WNK (With No Lysine)-like protein		GO:0005634,GO:0005737	nucleus|cytoplasm
AT1G60140	2722.5	871.183	4573.81	5.25052	2.39246	8.94e-121	1.05e-118	Up	23.9243	25.6831	21.1919	4.56156	4.58857	4.96561	TPS10	Araport:AT1G60140,TAIR:AT1G60140,GeneID:842309	Encodes an enzyme putatively involved in trehalose biosynthesis. The protein has a trehalose synthase (TPS)-like domain that may or may not be active as well as a trehalose phosphatase (TPP)-like domain.	trehalose phosphate synthase		GO:0005737,GO:0005992,GO:0016311,GO:0016757,GO:0070413	cytoplasm|trehalose biosynthetic process|dephosphorylation|transferase activity, transferring glycosyl groups|trehalose metabolism in response to stress	path:ath00500	Starch and sucrose metabolism
AT1G60190	363.721	703.21	24.2308	0.0345244	-4.85624	7.54e-89	5.34e-87	Down	0.261699	0.194795	0.219078	7.47681	7.2825	5.69633	PUB19	Araport:AT1G60190,TAIR:AT1G60190,GeneID:842314	Encodes PUB19, a plant U-box armadillo repeat protein. Involved in salt inhibition of germination together with PUB18.	ARM repeat superfamily protein		GO:0004842,GO:0005634,GO:0005737,GO:0010029	ubiquitin-protein transferase activity|nucleus|cytoplasm|regulation of seed germination
AT1G60270	624.047	832.256	415.838	0.499824	-1.00051	3.53e-09	2.28e-08	Down	4.84727	4.14102	6.26897	12.0113	10.7321	9.16568	BGLU6	Araport:AT1G60270,TAIR:AT1G60270,GeneID:3767579		beta glucosidase 6		GO:0005975,GO:0008422,GO:0102483	carbohydrate metabolic process|beta-glucosidase activity|scopolin beta-glucosidase activity	path:ath00460,path:ath00500,path:ath00940	Cyanoamino acid metabolism|Starch and sucrose metabolism|Phenylpropanoid biosynthesis
AT1G60590	26.2615	42.1536	10.3695	0.245938	-2.02364	0.0024195	0.00683017	Down	0.0313967	0.174496	0.117322	0.45366	0.709088	0.193904	F8A5.12	Araport:AT1G60590,TAIR:AT1G60590,GeneID:842353		Pectin lyase-like superfamily protein		GO:0004650,GO:0005576,GO:0005618,GO:0005975,GO:0009831	polygalacturonase activity|extracellular region|cell wall|carbohydrate metabolic process|plant-type cell wall modification involved in multidimensional cell growth
AT1G60870	2359.5	1558.95	3160.05	2.0263	1.01884	1.24e-23	1.88e-22	Up	48.7648	46.1151	48.7806	24.2088	21.6895	28.4663	MEE9	Araport:AT1G60870,TAIR:AT1G60870,GeneID:842379		maternal effect embryo arrest 9
AT1G60960	284.969	396.989	172.949	0.435829	-1.19816	9.59e-13	8.17e-12	Down	2.09121	1.88373	2.11915	4.84208	4.81551	4.97711	IRT3	Araport:AT1G60960,TAIR:AT1G60960,GeneID:842387	Encodes a plasma membrane localized zinc/iron transporter.	iron regulated transporter 3		GO:0005381,GO:0005385,GO:0005774,GO:0005886,GO:0006826,GO:0006829,GO:0009535,GO:0009624,GO:0016021,GO:0055072,GO:0071577	iron ion transmembrane transporter activity|zinc ion transmembrane transporter activity|vacuolar membrane|plasma membrane|iron ion transport|zinc ion transport|chloroplast thylakoid membrane|response to nematode|integral component of membrane|iron ion homeostasis|zinc ion transmembrane transport
AT1G61100	12365.2	5009.06	19721.4	3.93762	1.97732	6.27e-94	4.83e-92	Up	153.755	148.034	150.295	35.2281	42.0546	42.7247	F11P17.17	Araport:AT1G61100,TAIR:AT1G61100,GeneID:842403		disease resistance protein (TIR class)		GO:0005634,GO:0005886,GO:0009416,GO:0009718,GO:0015995,GO:0045893	nucleus|plasma membrane|response to light stimulus|anthocyanin-containing compound biosynthetic process|chlorophyll biosynthetic process|positive regulation of transcription, DNA-templated
AT1G61120	1090.7	2125.34	56.0616	0.0263839	-5.2442	2.33e-09	1.53e-08	Down	0.433244	0.0644968	0.796327	13.1477	19.8616	18.1212	TPS04	Araport:AT1G61120,TAIR:AT1G61120,GeneID:842405	Encodes a geranyllinalool synthase that produces a precursor to TMTT, a volatile plant defense C16-homoterpene. GES transcript levels rise in response to alamethicin, a fungal peptide mixture that damages membranes. This transcriptional response is blocked in JA biosynthetic and JA signaling mutants, but GES transcript levels still rise in response to alamethicin in mutants with salicylic acid an…	terpene synthase 04		GO:0000287,GO:0000304,GO:0005737,GO:0009611,GO:0009617,GO:0009753,GO:0010333,GO:0016102,GO:0080013,GO:0080027	magnesium ion binding|response to singlet oxygen|cytoplasm|response to wounding|response to bacterium|response to jasmonic acid|terpene synthase activity|diterpenoid biosynthetic process|(E,E)-geranyllinalool synthase activity|response to herbivore	path:ath00904	Diterpenoid biosynthesis
AT1G61170	693.513	423.105	963.921	2.27894	1.18837	1.68e-22	2.43e-21	Up	18.8483	18.7488	17.1326	8.44044	8.26378	8.42875	F11P17.11	Araport:AT1G61170,TAIR:AT1G61170,GeneID:842410		hypothetical protein
AT1G61340	557.928	1077.6	38.2533	0.0355486	-4.81406	2.25e-110	2.21e-108	Down	0.916309	0.759558	0.700372	20.8859	28.0657	20.7138	FBS1	Araport:AT1G61340,TAIR:AT1G61340,GeneID:842428	Encodes a F-box protein induced by various biotic or abiotic stress.	F-box family protein		GO:0006970,GO:0009611,GO:0009617,GO:0009651,GO:0009737,GO:0009751,GO:0009753,GO:0009961	response to osmotic stress|response to wounding|response to bacterium|response to salt stress|response to abscisic acid|response to salicylic acid|response to jasmonic acid|response to 1-aminocyclopropane-1-carboxylic acid
AT1G61390	16.0848	26.312	5.85769	0.221337	-2.17568	0.00348272	0.00946763	Down	0.0284832	0.0667843	0.0290278	0.245534	0.0829237	0.263865	T1F9.12	Araport:AT1G61390,TAIR:AT1G61390,GeneID:842433		S-locus lectin protein kinase family protein
AT1G61560	132.516	203.02	62.0122	0.30527	-1.71184	7.04e-11	5.24e-10	Down	0.515198	0.611218	0.339262	1.73352	1.56913	1.7236	MLO6	Araport:AT1G61560,TAIR:AT1G61560,GeneID:842450	A member of a large family of seven-transmembrane domain proteins specific to plants, homologs of the barley mildew resistance locus o (MLO) protein. The Arabidopsis genome contains 15 genes encoding MLO proteins, with localization in plasma membrane. Phylogenetic analysis revealed four clades of closely-related AtMLO genes. ATMLO6 belongs to the clade IV, with AtMLO2, AtMLO3 and AtMLO12. The gen…	Seven transmembrane MLO family protein		GO:0005516,GO:0005886,GO:0009817,GO:0016021	calmodulin binding|plasma membrane|defense response to fungus, incompatible interaction|integral component of membrane
AT1G61610	629.74	1226.43	33.0463	0.0270245	-5.20959	3.75e-140	6.08e-138	Down	0.293225	0.168061	0.261478	10.1541	9.59995	8.25646	T25B24.4	Araport:AT1G61610,TAIR:AT1G61610,GeneID:842457		S-locus lectin protein kinase family protein
AT1G61667	452.636	227.818	677.453	2.96791	1.56945	1.34e-18	1.63e-17	Up	13.8563	14.2833	15.1253	6.49846	3.65029	5.15836	AT1G61667	Araport:AT1G61667,TAIR:AT1G61667,GeneID:842463		serine protease, putative (Protein of unknown function, DUF538)
AT1G61680	16.625	6.9168	26.3332	3.77627	1.91696	0.00508681	0.013328	Up	0.348632	0.338249	0.257284	0.059218	0.050908	0.152399	TPS14	Araport:AT1G61680,TAIR:AT1G61680,GeneID:842465		terpene synthase 14		GO:0000287,GO:0009507,GO:0010333,GO:0016114,GO:0034007,GO:0043693	magnesium ion binding|chloroplast|terpene synthase activity|terpenoid biosynthetic process|S-linalool synthase activity|monoterpene biosynthetic process	path:ath00902	Monoterpenoid biosynthesis
AT1G61800	350.53	667.276	33.783	0.0507214	-4.30126	1.77e-67	8.73e-66	Down	0.552721	0.422388	0.262868	8.01064	10.2075	7.2224	GPT2	Araport:AT1G61800,TAIR:AT1G61800,GeneID:842477	glucose6-Phosphate/phosphate transporter 2. Expression is upregulated in the shoot of cax1/cax3 mutant.	glucose-6-phosphate/phosphate translocator 2		GO:0005315,GO:0005774,GO:0009624,GO:0009643,GO:0009744,GO:0009749,GO:0010109,GO:0015120,GO:0015152,GO:0015713,GO:0015714,GO:0015760,GO:0015979,GO:0016021,GO:0031969,GO:0035436,GO:0071917,GO:0080167	inorganic phosphate transmembrane transporter activity|vacuolar membrane|response to nematode|photosynthetic acclimation|response to sucrose|response to glucose|regulation of photosynthesis|phosphoglycerate transmembrane transporter activity|glucose-6-phosphate transmembrane transporter activity|phosphoglycerate transmembrane transport|phosphoenolpyruvate transport|glucose-6-phosphate transport|p…
AT1G61890	14510	27035.2	1984.76	0.0734194	-3.76769	2.39e-277	1.61e-274	Down	19.6923	18.1021	18.9837	247.055	301.847	257.775	F8K4.9	Araport:AT1G61890,TAIR:AT1G61890,GeneID:842485		MATE efflux family protein		GO:0006855,GO:0015238,GO:0015297,GO:0016021,GO:0080167	drug transmembrane transport|drug transmembrane transporter activity|antiporter activity|integral component of membrane|response to karrikin
AT1G61900	1408.67	561.635	2255.7	4.0171	2.00615	3.37e-75	1.97e-73	Up	25.0707	24.7015	24.9838	7.24772	6.23536	5.99271	F8K4.10	Araport:AT1G61900,TAIR:AT1G61900,GeneID:842486		hypothetical protein		GO:0005886,GO:0009506,GO:0031225,GO:0046658	plasma membrane|plasmodesma|anchored component of membrane|anchored component of plasma membrane
AT1G61930	33.8963	65.0388	2.75369	0.0421694	-4.56766	5.45e-12	4.41e-11	Down	0.0469647	0.0978826	0.0478627	1.57314	1.71533	1.46552	F8K4.12	Araport:AT1G61930,TAIR:AT1G61930,GeneID:842488		senescence regulator (Protein of unknown function, DUF584)
AT1G62050	346.345	513.273	179.418	0.349506	-1.51661	4e-20	5.26e-19	Down	1.95945	1.74435	1.56542	5.32559	4.69084	5.78985	AT1G62050	Araport:AT1G62050,TAIR:AT1G62050,GeneID:842501		Ankyrin repeat family protein
AT1G62150	84.1114	113.086	55.1363	0.486909	-1.03827	0.00231658	0.00656841	Down	0.699393	0.789563	0.427659	1.86037	0.999568	1.27309	F19K23.9	Araport:AT1G62150,TAIR:AT1G62150,GeneID:842511		Mitochondrial transcription termination factor family protein
AT1G62180	3967.96	1636.19	6299.72	3.84965	1.94473	4.84e-70	2.57e-68	Up	71.5679	59.383	76.6292	20.7016	16.8421	18.9609	2023-04-02	Araport:AT1G62180,TAIR:AT1G62180,GeneID:842514	encodes a adenosine 5'-phosphosulfate reductase, involved in sulfate assimilation. Is a major effect locus for natural variation of shoot sulfate content in Arabidopsis.	5'adenylylphosphosulfate reductase 2		GO:0000103,GO:0004604,GO:0009507,GO:0009570,GO:0009973,GO:0019344,GO:0019379,GO:0033741,GO:0045454	sulfate assimilation|phosphoadenylyl-sulfate reductase (thioredoxin) activity|chloroplast|chloroplast stroma|adenylyl-sulfate reductase activity|cysteine biosynthetic process|sulfate assimilation, phosphoadenylyl sulfate reduction by phosphoadenylyl-sulfate reductase (thioredoxin)|adenylyl-sulfate reductase (glutathione) activity|cell redox homeostasis	path:ath00920	Sulfur metabolism
AT1G62320	34.415	61.6038	7.22622	0.116909	-3.09654	7.55e-09	4.72e-08	Down	0.0358976	0.0748167	0.0439007	0.353656	0.44084	0.588091	F24O1.4	Araport:AT1G62320,TAIR:AT1G62320,GeneID:842530		ERD (early-responsive to dehydration stress) family protein		GO:0005227,GO:0005886,GO:0016021	calcium activated cation channel activity|plasma membrane|integral component of membrane
AT1G62510	617.933	185.192	1050.67	5.67135	2.50369	1.53e-10	1.11e-09	Up	16.5767	33.8057	29.3498	3.73782	4.25924	6.77876	T3P18.7	Araport:AT1G62510,TAIR:AT1G62510,GeneID:842548		Bifunctional inhibitor/lipid-transfer protein/seed storage 2S albumin superfamily protein		GO:0005576,GO:0005783,GO:0009409,GO:0009505,GO:0009506,GO:0009651,GO:0009682,GO:0009707,GO:0009737,GO:0050832	extracellular region|endoplasmic reticulum|response to cold|plant-type cell wall|plasmodesma|response to salt stress|induced systemic resistance|chloroplast outer membrane|response to abscisic acid|defense response to fungus
AT1G62560	2304.43	3523.18	1085.69	0.308231	-1.69791	3.65e-35	8.42e-34	Down	12.3195	7.96308	11.8177	36.9772	35.7376	36.2334	FMO GS-OX3	Araport:AT1G62560,TAIR:AT1G62560,GeneID:842553	belongs to the flavin-monooxygenase (FMO) family, encodes a glucosinolate S-oxygenase that catalyzes the conversion of methylthioalkyl glucosinolates to methylsulfinylalkyl glucosinolates	flavin-monooxygenase glucosinolate S-oxygenase 3		GO:0004497,GO:0004499,GO:0016021,GO:0019761,GO:0050660,GO:0050661,GO:0080102,GO:0080103,GO:0080104,GO:0080105,GO:0080106,GO:0080107	monooxygenase activity|N,N-dimethylaniline monooxygenase activity|integral component of membrane|glucosinolate biosynthetic process|flavin adenine dinucleotide binding|NADP binding|3-methylthiopropyl glucosinolate S-oxygenase activity|4-methylthiopropyl glucosinolate S-oxygenase activity|5-methylthiopropyl glucosinolate S-oxygenase activity|6-methylthiopropyl glucosinolate S-oxygenase activity|7-…
AT1G62570	1480.26	2227.67	732.838	0.329001	-1.60384	4.28e-40	1.14e-38	Down	7.82804	6.22181	8.25854	25.2174	21.2746	24.5824	FMO GS-OX4	Araport:AT1G62570,TAIR:AT1G62570,GeneID:842554	belongs to the flavin-monooxygenase (FMO) family, encodes a glucosinolate S-oxygenase that catalyzes the conversion of methylthioalkyl glucosinolates to methylsulfinylalkyl glucosinolates	flavin-monooxygenase glucosinolate S-oxygenase 4		GO:0004497,GO:0004499,GO:0019761,GO:0050660,GO:0050661,GO:0080103,GO:0080107	monooxygenase activity|N,N-dimethylaniline monooxygenase activity|glucosinolate biosynthetic process|flavin adenine dinucleotide binding|NADP binding|4-methylthiopropyl glucosinolate S-oxygenase activity|8-methylthiopropyl glucosinolate S-oxygenase activity
AT1G62870	94.5605	152.928	36.193	0.236502	-2.08007	4.16e-10	2.9e-09	Down	0.345124	0.277911	0.223824	1.08185	0.913425	1.77452	F16P17.2	Araport:AT1G62870,TAIR:AT1G62870,GeneID:842588		hypothetical protein
AT1G62990	37.0892	50.1135	24.0649	0.479464	-1.06051	0.0160425	0.0369478	Down	0.238128	0.46528	0.364021	0.821095	0.724779	0.783707	KNAT7	Araport:AT1G62990,TAIR:AT1G62990,GeneID:842602	Encodes a homeodomain transcription factor of the Knotted family. May be involved in secondary cell wall biosynthesis. Mutants have moderately irregular xylem development. Expression of this gene is upregulated by SND1 and MYB46.	homeobox knotted-like protein	TALE	GO:0003677,GO:0003700,GO:0005634,GO:0010089,GO:0010192,GO:0045892,GO:2000652	DNA binding|DNA-binding transcription factor activity|nucleus|xylem development|mucilage biosynthetic process|negative regulation of transcription, DNA-templated|regulation of secondary cell wall biogenesis
AT1G63030	27.215	54.4299	0	0.00347466	-8.16891	5.81e-10	4e-09	Down	0	0	0	1.48241	1.75696	0.474719	ddf2	Araport:AT1G63030,TAIR:AT1G63030,GeneID:842606	encodes a member of the DREB subfamily A-1 of ERF/AP2 transcription factor family (DDF2). The protein contains one AP2 domain. There are six members in this subfamily, including CBF1, CBF2, and CBF3. Overexpression of this gene results in the reduction of gibberellic acid biosynthesis. This gene is expressed in all tissues examined, but most abundantly expressed in rosette leaves and stems. Overe…	Integrase-type DNA-binding superfamily protein	ERF	GO:0003677,GO:0003700,GO:0005634,GO:0010371,GO:0048510	DNA binding|DNA-binding transcription factor activity|nucleus|regulation of gibberellin biosynthetic process|regulation of timing of transition from vegetative to reproductive phase
AT1G63100	29.5973	16.056	43.1386	2.70158	1.43381	0.00586004	0.0151096	Up	0.295426	0.330949	0.323655	0.0582095	0.172016	0.13684	F16M19.21	Araport:AT1G63100,TAIR:AT1G63100,GeneID:842613		GRAS family transcription factor	GRAS	GO:0003700,GO:0005634,GO:0006355,GO:0043565,GO:1900459	DNA-binding transcription factor activity|nucleus|regulation of transcription, DNA-templated|sequence-specific DNA binding|positive regulation of brassinosteroid mediated signaling pathway
AT1G63120	677.465	431.021	923.909	2.14401	1.10031	6.42e-17	7.1e-16	Up	12.032	12.0136	14.5006	6.34036	6.14676	6.33036	RBL2	Araport:AT1G63120,TAIR:AT1G63120,GeneID:842616	AtRBL2 has been identified as a rhomboid protein involved in regulated intramembrane proteolysis (RIP). The enzyme has the proteolytic activity and substrate specificity comparable to the Drosophila Rho-1 protein.	RHOMBOID-like 2		GO:0000139,GO:0004252,GO:0005794,GO:0009506,GO:0016021	Golgi membrane|serine-type endopeptidase activity|Golgi apparatus|plasmodesma|integral component of membrane
AT1G63180	118.182	65.7698	170.595	2.59161	1.37385	6.99e-08	3.93e-07	Up	2.11413	2.5628	2.63823	1.11933	0.88308	0.95366	UGE3	Araport:AT1G63180,TAIR:AT1G63180,GeneID:842622	Encodes a protein with UDP-D-glucose 4-epimerase activity. Involved in pollen development.	UDP-D-glucose/UDP-D-galactose 4-epimerase 3		GO:0003978,GO:0006012,GO:0009555,GO:0033358,GO:0045227,GO:0050373,GO:0071555	UDP-glucose 4-epimerase activity|galactose metabolic process|pollen development|UDP-L-arabinose biosynthetic process|capsule polysaccharide biosynthetic process|UDP-arabinose 4-epimerase activity|cell wall organization	path:ath00052,path:ath00520	Galactose metabolism|Amino sugar and nucleotide sugar metabolism
AT1G63260	715.052	237.797	1192.31	5.02453	2.32899	3.82e-42	1.06e-40	Up	13.9072	15.8577	15.0204	3.43769	3.61408	2.24798	TET10	Araport:AT1G63260,TAIR:AT1G63260,GeneID:842632	Member of TETRASPANIN family	tetraspanin10		GO:0005886,GO:0009506,GO:0016021	plasma membrane|plasmodesma|integral component of membrane
AT1G63720	297.55	463.738	131.362	0.283614	-1.818	1.1e-22	1.59e-21	Down	2.03101	1.45771	1.78198	6.17499	6.89188	6.36131	F24D7.9	Araport:AT1G63720,TAIR:AT1G63720,GeneID:842676		hydroxyproline-rich glycoprotein family protein		GO:0005886	plasma membrane
AT1G63820	47.6759	85.7721	9.57975	0.111861	-3.16022	1.63e-10	1.18e-09	Down	0.108832	0.113412	0.221825	1.48575	1.77762	0.864177	T12P18.16	Araport:AT1G63820,TAIR:AT1G63820,GeneID:842685		CCT motif family protein		GO:0003700,GO:0005634,GO:0008270,GO:0009909,GO:0010099,GO:0010161,GO:0043565	DNA-binding transcription factor activity|nucleus|zinc ion binding|regulation of flower development|regulation of photomorphogenesis|red light signaling pathway|sequence-specific DNA binding
AT1G63840	169.32	282.501	56.1383	0.198565	-2.33232	1.65e-22	2.39e-21	Down	0.882937	0.978826	1.28272	5.36717	4.81288	6.42998	T12P18.14	Araport:AT1G63840,TAIR:AT1G63840,GeneID:842687		RING/U-box superfamily protein		GO:0004842,GO:0010200,GO:0016567,GO:0046686,GO:0046872	ubiquitin-protein transferase activity|response to chitin|protein ubiquitination|response to cadmium ion|metal ion binding
AT1G63860	4791.49	2920.92	6662.07	2.28153	1.19	3.95e-34	8.88e-33	Up	38.986	37.8979	37.209	17.0458	18.84	16.329	T12P18.12	Araport:AT1G63860,TAIR:AT1G63860,GeneID:3767624		Disease resistance protein (TIR-NBS-LRR class) family		GO:0005524,GO:0007165,GO:0043531,GO:0050832	ATP binding|signal transduction|ADP binding|defense response to fungus
AT1G63900	1792.08	1162.43	2421.72	2.08285	1.05856	2.48e-21	3.42e-20	Up	32.3734	27.1542	33.0054	15.2463	13.983	17.3397	DAL1	Araport:AT1G63900,TAIR:AT1G63900,GeneID:842693	Encodes a RING-type ubiquitin E3 ligase of the chloroplast outer membrane that associates with TOC complexes and mediated ubiquitination of TOC components, promoting their degradation.	E3 Ubiquitin ligase family protein		GO:0004842,GO:0006996,GO:0009707,GO:0016021,GO:0046872,GO:1904215	ubiquitin-protein transferase activity|organelle organization|chloroplast outer membrane|integral component of membrane|metal ion binding|regulation of protein import into chloroplast stroma
AT1G64220	37.0684	7.51566	66.6211	8.7624	3.13133	4.29e-08	2.48e-07	Up	4.2167	3.46908	7.01142	0.291523	0.313267	1.15422	TOM7-2	Araport:AT1G64220,TAIR:AT1G64220,GeneID:842727		translocase of outer membrane 7 kDa subunit 2		GO:0005742,GO:0016021,GO:0030150	mitochondrial outer membrane translocase complex|integral component of membrane|protein import into mitochondrial matrix
AT1G64330	1906.02	1101.27	2710.78	2.46055	1.29898	1.88e-19	2.39e-18	Up	28.6189	31.2706	28.5085	10.3104	10.8942	16.5185	F15H21.4	Araport:AT1G64330,TAIR:AT1G64330,GeneID:842739		myosin heavy chain-like protein		GO:0003779,GO:0005773,GO:0005774,GO:0005856,GO:0005886,GO:0006970,GO:0009507,GO:0009737,GO:0009738,GO:0009789,GO:0042306,GO:0071215	actin binding|vacuole|vacuolar membrane|cytoskeleton|plasma membrane|response to osmotic stress|chloroplast|response to abscisic acid|abscisic acid-activated signaling pathway|positive regulation of abscisic acid-activated signaling pathway|regulation of protein import into nucleus|cellular response to abscisic acid stimulus
AT1G64380	224.373	313.36	135.387	0.432287	-1.20994	6.64e-09	4.17e-08	Down	2.21631	1.48162	1.93196	4.11974	4.30897	5.21957	F15H21.12	Araport:AT1G64380,TAIR:AT1G64380,GeneID:842745	encodes a member of the DREB subfamily A-6 of ERF/AP2 transcription factor family. The protein contains one AP2 domain. There are 8 members in this subfamily including RAP2.4.	Integrase-type DNA-binding superfamily protein	ERF	GO:0003677,GO:0003700,GO:0005634,GO:0009873,GO:0010200	DNA binding|DNA-binding transcription factor activity|nucleus|ethylene-activated signaling pathway|response to chitin
AT1G64390	1576.42	2941.33	211.51	0.0719743	-3.79637	1.95e-172	4.65e-170	Down	1.89325	1.2982	1.97956	24.8127	24.9888	25.3992	GH9C2	Araport:AT1G64390,TAIR:AT1G64390,GeneID:842747		glycosyl hydrolase 9C2		GO:0005576,GO:0008810,GO:0030245,GO:0030246,GO:0071555	extracellular region|cellulase activity|cellulose catabolic process|carbohydrate binding|cell wall organization	path:ath00500	Starch and sucrose metabolism
AT1G64405	12.6511	24.968	0.334249	0.0147026	-6.08778	1.31e-05	5.57e-05	Down	0.0257531	0	0	1.11634	0.354431	0.552488	AT1G64405	Araport:AT1G64405,TAIR:AT1G64405,GeneID:842749		hypothetical protein
AT1G64450	41.3262	57.3213	25.331	0.440896	-1.18149	0.00737353	0.0185124	Down	0.469071	0.506916	0.336398	1.38636	0.643725	1.10118	F15H21.17	Araport:AT1G64450,TAIR:AT1G64450,GeneID:842753		Glycine-rich protein family
AT1G64500	248.71	361.018	136.402	0.377497	-1.40546	6.81e-11	5.08e-10	Down	1.72173	2.21544	2.15135	4.6609	4.97685	7.28514	F1N19.7	Araport:AT1G64500,TAIR:AT1G64500,GeneID:842758	A member of a protein family found in plants and animals that contain conserved C-terminal glutaredoxin-like and putative zinc-binding cysteine-rich domains. It is involved in light stimulated actin bundling and chloroplast movement.	Glutaredoxin family protein		GO:0005886,GO:0009055,GO:0015035,GO:0045454	plasma membrane|electron transfer activity|protein disulfide oxidoreductase activity|cell redox homeostasis
AT1G64583	23.255	37.4919	9.01815	0.239455	-2.06217	0.00260145	0.00729645	Down	0.0353151	0.220809	0.059984	0.695835	0.373868	0.309937	AT1G64583	Araport:AT1G64583,TAIR:AT1G64583,GeneID:10723135		Tetratricopeptide repeat (TPR)-like superfamily protein
AT1G64600	197.456	268.529	126.383	0.470397	-1.08805	2.05e-07	1.1e-06	Down	1.63727	1.35999	1.47511	3.23769	2.76326	3.97987	F1N19.17	Araport:AT1G64600,TAIR:AT1G64600,GeneID:842768		copper ion binding / methyltransferase		GO:0005507,GO:0005739,GO:0005759,GO:0005763,GO:0008168,GO:0016021,GO:0031304,GO:0032543,GO:0033617	copper ion binding|mitochondrion|mitochondrial matrix|mitochondrial small ribosomal subunit|methyltransferase activity|integral component of membrane|intrinsic component of mitochondrial inner membrane|mitochondrial translation|mitochondrial respiratory chain complex IV assembly
AT1G64640	752.463	461.464	1043.46	2.26151	1.17729	4.18e-21	5.69e-20	Up	21.0788	22.4395	23.8197	9.61566	10.2642	11.2905	ENODL8	Araport:AT1G64640,TAIR:AT1G64640,GeneID:842772		early nodulin-like protein 8		GO:0009055,GO:0046872	electron transfer activity|metal ion binding
AT1G64740	1212.35	754.73	1669.96	2.21234	1.14558	7.96e-30	1.52e-28	Up	22.1711	23.3184	22.7486	10.8673	10.1692	11.2644	TUA1	Araport:AT1G64740,TAIR:AT1G64740,GeneID:842782	alpha-tubulin expressed primarily in stamens and mature pollen	alpha-1 tubulin		GO:0000226,GO:0000278,GO:0003924,GO:0005200,GO:0005525,GO:0005737,GO:0005829,GO:0005874,GO:0005886,GO:0007017	microtubule cytoskeleton organization|mitotic cell cycle|GTPase activity|structural constituent of cytoskeleton|GTP binding|cytoplasm|cytosol|microtubule|plasma membrane|microtubule-based process	path:ath04145	Phagosome
AT1G64780	177.141	281.536	72.7464	0.257938	-1.9549	7.3e-09	4.58e-08	Down	0.669177	0.969739	0.628693	3.82165	1.2951	4.19057	AMT1;2	Araport:AT1G64780,TAIR:AT1G64780,GeneID:842786	encodes an ammonium transporter protein believed to act as a high affinity transporter. It is expressed in the root, primarily in endodermal and cortical cells, and contributes to ammonium uptake in the root.	ammonium transporter 1;2		GO:0005886,GO:0005887,GO:0008519,GO:0009624,GO:0015696,GO:0015843,GO:0072488	plasma membrane|integral component of plasma membrane|ammonium transmembrane transporter activity|response to nematode|ammonium transport|methylammonium transport|ammonium transmembrane transport
AT1G64900	3758.51	5875.16	1641.85	0.279499	-1.83909	9.75e-69	4.97e-67	Down	22.0819	17.7426	19.2699	68.2003	72.8019	80.2728	CYP89A2	Araport:AT1G64900,TAIR:AT1G64900,GeneID:842798	Encodes cytochrome P450 (CYP89A2).	cytochrome P450, family 89, subfamily A, polypeptide 2		GO:0005506,GO:0016020,GO:0016021,GO:0016709,GO:0020037	iron ion binding|membrane|integral component of membrane|oxidoreductase activity, acting on paired donors, with incorporation or reduction of molecular oxygen, NAD(P)H as one donor, and incorporation of one atom of oxygen|heme binding
AT1G64950	3154.19	4294.76	2013.62	0.468927	-1.09256	2.45e-25	3.98e-24	Down	24.2145	19.2098	22.8337	46.668	49.0044	52.1632	CYP89A5	Araport:AT1G64950,TAIR:AT1G64950,GeneID:842803	member of CYP89A	cytochrome P450, family 89, subfamily A, polypeptide 5		GO:0005506,GO:0016020,GO:0016021,GO:0016709,GO:0020037	iron ion binding|membrane|integral component of membrane|oxidoreductase activity, acting on paired donors, with incorporation or reduction of molecular oxygen, NAD(P)H as one donor, and incorporation of one atom of oxygen|heme binding
AT1G65240	68.7597	111.215	26.3043	0.236776	-2.0784	1.28e-08	7.78e-08	Down	0.293295	0.236175	0.516286	1.54981	1.63718	1.43003	T23K8.15	Araport:AT1G65240,TAIR:AT1G65240,GeneID:842831		Eukaryotic aspartyl protease family protein		GO:0004190,GO:0005886,GO:0006508,GO:0030163,GO:0031225,GO:0046658	aspartic-type endopeptidase activity|plasma membrane|proteolysis|protein catabolic process|anchored component of membrane|anchored component of plasma membrane
AT1G65330	56.9617	24.6013	89.3222	3.62133	1.85652	2.28e-06	1.08e-05	Up	1.42529	2.44634	1.70888	0.722734	0.421606	0.470103	PHE1	Araport:AT1G65330,TAIR:AT1G65330,GeneID:842841	Type I MADS-box protein, regulated by MEA and FIE, expressed transiently after fertilization in embryo and endosperm.	MADS-box transcription factor family protein	M-type_MADS	GO:0000982,GO:0000987,GO:0003700,GO:0005634,GO:0007275,GO:0008134,GO:0009793,GO:0043565,GO:0044212,GO:0045944,GO:0046983,GO:0090406	transcription factor activity, RNA polymerase II proximal promoter sequence-specific DNA binding|proximal promoter sequence-specific DNA binding|DNA-binding transcription factor activity|nucleus|multicellular organism development|transcription factor binding|embryo development ending in seed dormancy|sequence-specific DNA binding|transcription regulatory region DNA binding|positive regulation of …
AT1G65450	115.933	182.543	49.3222	0.27076	-1.88491	2.52e-10	1.8e-09	Down	0.483496	0.244924	0.260057	1.29006	1.33652	1.1918	GLC	Araport:AT1G65450,TAIR:AT1G65450,GeneID:842857	Contains dual transcription units and alternative splicing that could rescue the sterility defect of glc mutants. Shares homology to BAHD (for BEAT, AHCT, HCBT, and DAT) acyl-transferases. Functions in double fertilization.	HXXXD-type acyl-transferase family protein		GO:0010345,GO:0050734,GO:0052325,GO:0102406	suberin biosynthetic process|hydroxycinnamoyltransferase activity|cell wall pectin biosynthetic process|omega-hydroxypalmitate O-sinapoyl transferase activity
AT1G65483	11.4445	18.4331	4.45591	0.241743	-2.04846	0.0105453	0.0254504	Down	0.042207	0.0586444	0.0860279	0.207907	0.297886	0.301825	AT1G65483	Araport:AT1G65483,TAIR:AT1G65483,GeneID:5007835		hypothetical protein
AT1G65484	21.1348	32.5979	9.67173	0.296585	-1.75348	0.0184236	0.0416272	Down	0.280334	0.693815	0.0357118	1.13924	1.66939	0.717589	AT1G65484	Araport:AT1G65484,TAIR:AT1G65484,GeneID:6240315		transmembrane protein
AT1G65500	172.84	238.431	107.249	0.44965	-1.15312	4.9e-08	2.82e-07	Down	2.96437	3.65079	2.96002	7.66983	7.19583	7.41654	F5I14.4	Araport:AT1G65500,TAIR:AT1G65500,GeneID:842862		transmembrane protein
AT1G65590	885.562	585.062	1186.06	2.02886	1.02067	2.23e-15	2.25e-14	Up	11.9515	10.7925	12.5152	6.37326	6.37377	5.41411	HEXO3	Araport:AT1G65590,TAIR:AT1G65590,GeneID:842871	Encodes a protein with beta-hexosaminidase activity. Located on the plasma membrane.	beta-hexosaminidase 3		GO:0004563,GO:0005618,GO:0005886,GO:0005975,GO:0009505,GO:0015929,GO:0102148	beta-N-acetylhexosaminidase activity|cell wall|plasma membrane|carbohydrate metabolic process|plant-type cell wall|hexosaminidase activity|N-acetyl-beta-D-galactosaminidase activity	path:ath00511,path:ath00520,path:ath00531,path:ath00603,path:ath00604	Other glycan degradation|Amino sugar and nucleotide sugar metabolism|Glycosaminoglycan degradation|Glycosphingolipid biosynthesis - globo and isoglobo series|Glycosphingolipid biosynthesis - ganglio series
AT1G65690	255.542	455.924	55.1589	0.121187	-3.0447	1.99e-32	4.15e-31	Down	1.5019	0.905121	0.571674	7.82603	8.81206	9.08739	F1E22.7	Araport:AT1G65690,TAIR:AT1G65690,GeneID:842880		Late embryogenesis abundant (LEA) hydroxyproline-rich glycoprotein family		GO:0005829,GO:0005886,GO:0006970,GO:0009737,GO:0009738,GO:0010116,GO:0016021,GO:1902074	cytosol|plasma membrane|response to osmotic stress|response to abscisic acid|abscisic acid-activated signaling pathway|positive regulation of abscisic acid biosynthetic process|integral component of membrane|response to salt
AT1G65730	11.905	19.7044	4.10561	0.208012	-2.26526	0.00550169	0.0142856	Down	0.0273064	0.0284556	0.055657	0.269017	0.125269	0.168643	YSL7	Araport:AT1G65730,TAIR:AT1G65730,GeneID:842884	Arabidopsis thaliana metal-nicotianamine transporter YSL4	YELLOW STRIPE like 7		GO:0005886,GO:0016021,GO:0055085	plasma membrane|integral component of membrane|transmembrane transport
AT1G65860	1350.04	2155.26	544.812	0.252888	-1.98343	1.33e-43	3.8e-42	Down	8.51172	5.4961	7.21098	32.2948	27.8762	27.6503	FMO GS-OX1	Araport:AT1G65860,TAIR:AT1G65860,GeneID:842897	belongs to the flavin-monooxygenase (FMO) family, encodes a glucosinolate S-oxygenase that catalyzes the conversion of methylthioalkyl glucosinolates to methylsulfinylalkyl glucosinolates	flavin-monooxygenase glucosinolate S-oxygenase 1		GO:0004497,GO:0004499,GO:0033506,GO:0050660,GO:0050661,GO:0080102,GO:0080103,GO:0080104,GO:0080105,GO:0080106,GO:0080107	monooxygenase activity|N,N-dimethylaniline monooxygenase activity|glucosinolate biosynthetic process from homomethionine|flavin adenine dinucleotide binding|NADP binding|3-methylthiopropyl glucosinolate S-oxygenase activity|4-methylthiopropyl glucosinolate S-oxygenase activity|5-methylthiopropyl glucosinolate S-oxygenase activity|6-methylthiopropyl glucosinolate S-oxygenase activity|7-methylthiop…
AT1G65870	32.6696	55.8047	9.53442	0.171132	-2.54681	2.54e-06	1.19e-05	Down	0.315572	0.197312	0.0857614	0.953411	1.15816	1.55916	F12P19.3	Araport:AT1G65870,TAIR:AT1G65870,GeneID:842898		Disease resistance-responsive (dirigent-like protein) family protein		GO:0005576,GO:0005618	extracellular region|cell wall
AT1G65890	111.584	220.079	3.08794	0.013996	-6.15884	2.93e-30	5.71e-29	Down	0.0349157	0.0485136	0.0237222	2.61427	2.67373	2.70114	AAE12	Araport:AT1G65890,TAIR:AT1G65890,GeneID:842901		acyl activating enzyme 12		GO:0005777,GO:0006631,GO:0016874	peroxisome|fatty acid metabolic process|ligase activity
AT1G65930	11453.4	7523.26	15383.6	2.0449	1.03203	1.49e-35	3.5e-34	Up	148.071	155.779	150.418	82.4454	76.2979	73.6393	cICDH	Araport:AT1G65930,TAIR:AT1G65930,GeneID:842905	Encodes a NADP+-isocitrate dehydrogenase that is believed to function in the cytosol. It appears to contribute to NADPH production under oxidative stress, and thereby to participate in redox signalling linked to defense responses.	cytosolic NADP+-dependent isocitrate dehydrogenase		GO:0000287,GO:0004450,GO:0005507,GO:0005829,GO:0005886,GO:0006099,GO:0006102,GO:0006739,GO:0009506,GO:0009570,GO:0009651,GO:0010043,GO:0042742,GO:0042803,GO:0046686,GO:0048046,GO:0051287	magnesium ion binding|isocitrate dehydrogenase (NADP+) activity|copper ion binding|cytosol|plasma membrane|tricarboxylic acid cycle|isocitrate metabolic process|NADP metabolic process|plasmodesma|chloroplast stroma|response to salt stress|response to zinc ion|defense response to bacterium|protein homodimerization activity|response to cadmium ion|apoplast|NAD binding	path:ath00020,path:ath00480,path:ath04146	Citrate cycle (TCA cycle)|Glutathione metabolism|Peroxisome
AT1G66060	349.491	162.602	536.379	3.2965	1.72093	1.54e-17	1.77e-16	Up	8.45763	5.4705	8.29382	2.80479	1.98483	2.27515	F15E12.9	Araport:AT1G66060,TAIR:AT1G66060,GeneID:842920		hypothetical protein (DUF577)
AT1G66090	2064.59	3806.75	322.429	0.0846911	-3.56165	1.22e-20	1.63e-19	Down	4.22069	6.30756	2.51721	51.1945	59.7544	49.7601	F15E12.17	Araport:AT1G66090,TAIR:AT1G66090,GeneID:842923		Disease resistance protein (TIR-NBS class)		GO:0005524,GO:0007165,GO:0043531,GO:0050832	ATP binding|signal transduction|ADP binding|defense response to fungus
AT1G66100	3524.08	1755.93	5292.24	3.01544	1.59237	3.85e-25	6.21e-24	Up	117.977	103.538	138.652	36.24	52.1576	35.8487	F15E12.20	Araport:AT1G66100,TAIR:AT1G66100,GeneID:842924	Predicted to encode a PR (pathogenesis-related) protein. Belongs to the plant thionin (PR-13) family with the following members: At1g66100, At5g36910, At1g72260, At2g15010, At1g12663, At1g12660.	Plant thionin		GO:0005576,GO:0006952,GO:0090729	extracellular region|defense response|toxin activity
AT1G66150	8226.61	3171.81	13281.4	4.188	2.06626	2.7e-151	5.02e-149	Up	87.7251	87.6119	91.5034	22.1754	22.2674	22.2058	TMK1	Araport:AT1G66150,TAIR:AT1G66150,GeneID:842930	receptor-like transmembrane kinase I (TMK1)	transmembrane kinase 1
AT1G66230	285.621	77.4619	493.78	6.40282	2.67871	5.21e-28	9.39e-27	Up	6.78783	7.17577	10.1181	0.902374	1.73157	1.29193	MYB20	Araport:AT1G66230,TAIR:AT1G66230,GeneID:842938	Encodes a putative transcription factor (MYB20).	myb domain protein 20	MYB	GO:0001158,GO:0003700,GO:0005634,GO:0030154,GO:0043565,GO:0044212,GO:0045892,GO:1901002,GO:2000652	enhancer sequence-specific DNA binding|DNA-binding transcription factor activity|nucleus|cell differentiation|sequence-specific DNA binding|transcription regulatory region DNA binding|negative regulation of transcription, DNA-templated|positive regulation of response to salt stress|regulation of secondary cell wall biogenesis
AT1G66250	232.466	329.509	135.423	0.41083	-1.28339	4.46e-09	2.85e-08	Down	1.82124	1.28078	1.41197	4.49112	2.86255	4.19479	T6J19.7	Araport:AT1G66250,TAIR:AT1G66250,GeneID:842942		O-Glycosyl hydrolases family 17 protein		GO:0005886,GO:0005975,GO:0006952,GO:0031225,GO:0042973,GO:0046658	plasma membrane|carbohydrate metabolic process|defense response|anchored component of membrane|glucan endo-1,3-beta-D-glucosidase activity|anchored component of plasma membrane	path:ath00500	Starch and sucrose metabolism
AT1G66350	1023.5	1529.64	517.356	0.338297	-1.56364	7.35e-46	2.22e-44	Down	5.67556	5.40456	5.69543	16.6351	17.2888	17.9606	RGL1	Araport:AT1G66350,TAIR:AT1G66350,GeneID:842953	Negative regulator of GA responses, member of GRAS family of transcription factors. Also belongs to the DELLA proteins that restrain the cell proliferation and expansion that drives plant growth. RGL1 may be involved in reducing ROS accumulation in response to stress by up-regulating the transcription of superoxide dismutases. Rapidly degraded in response to GA. Involved in flower and fruit devel…	RGA-like 1	GRAS	GO:0003700,GO:0003712,GO:0005634,GO:0009723,GO:0009737,GO:0009739,GO:0009740,GO:0009863,GO:0009867,GO:0009908,GO:0009938,GO:0010187,GO:0030154,GO:0042538,GO:0043565,GO:2000033,GO:2000377	DNA-binding transcription factor activity|transcription coregulator activity|nucleus|response to ethylene|response to abscisic acid|response to gibberellin|gibberellic acid mediated signaling pathway|salicylic acid mediated signaling pathway|jasmonic acid mediated signaling pathway|flower development|negative regulation of gibberellic acid mediated signaling pathway|negative regulation of seed ge…	path:ath04075	Plant hormone signal transduction
AT1G66390	56.9927	112.934	1.05091	0.00911465	-6.7776	8.45e-14	7.79e-13	Down	0	0.0706279	0	2.13667	3.22881	2.55552	MYB90	Araport:AT1G66390,TAIR:AT1G66390,GeneID:842957	production of anthocyanin pigment 2 protein (PAP2)	myb domain protein 90	MYB	GO:0003700,GO:0005634,GO:0006355,GO:0030154,GO:0043565,GO:0044212,GO:0080167	DNA-binding transcription factor activity|nucleus|regulation of transcription, DNA-templated|cell differentiation|sequence-specific DNA binding|transcription regulatory region DNA binding|response to karrikin
AT1G66400	65.5045	90.5814	40.4276	0.446489	-1.1633	0.00085544	0.00266499	Down	0.928698	1.11295	0.757164	2.58469	2.28589	1.67539	CML23	Araport:AT1G66400,TAIR:AT1G66400,GeneID:842958	Encodes a calmodulin-like protein. Regulates nitric oxide levels and transition to flowering.	calmodulin like 23		GO:0005509,GO:0009909,GO:0080164	calcium ion binding|regulation of flower development|regulation of nitric oxide metabolic process	path:ath04626	Plant-pathogen interaction
AT1G66465	257.532	452.142	62.9215	0.139224	-2.84452	1.08e-28	2.01e-27	Down	1.37352	1.32262	0.567	7.36532	8.98226	8.12108	AT1G66465	Araport:AT1G66465,GeneID:28717403		transmembrane protein
AT1G66500	540.593	784.465	296.721	0.378398	-1.40202	1.83e-17	2.09e-16	Down	3.94931	4.83127	3.879	11.038	13.4367	10.4093	F28G11.6	Araport:AT1G66500,TAIR:AT1G66500,GeneID:842968		Pre-mRNA cleavage complex II		GO:0000993,GO:0003729,GO:0005737,GO:0005849,GO:0006369,GO:0006378,GO:0046872	RNA polymerase II complex binding|mRNA binding|cytoplasm|mRNA cleavage factor complex|termination of RNA polymerase II transcription|mRNA polyadenylation|metal ion binding	path:ath03015	mRNA surveillance pathway
AT1G66520	239.173	327.922	150.425	0.458458	-1.12514	3.84e-05	0.000150951	Down	1.77011	3.06844	2.79266	8.36726	5.04525	4.01655	pde194	Araport:AT1G66520,TAIR:AT1G66520,GeneID:842970		formyltransferase		GO:0004479,GO:0005737,GO:0005739,GO:0070124,GO:0071951	methionyl-tRNA formyltransferase activity|cytoplasm|mitochondrion|mitochondrial translational initiation|conversion of methionyl-tRNA to N-formyl-methionyl-tRNA	path:ath00670,path:ath00970	One carbon pool by folate|Aminoacyl-tRNA biosynthesis
AT1G66540	209.505	365.336	53.6747	0.14691	-2.767	5.43e-33	1.16e-31	Down	0.562161	0.523054	0.521757	3.19441	3.52832	4.74771	F28G11.4	Araport:AT1G66540,TAIR:AT1G66540,GeneID:842972		Cytochrome P450 superfamily protein		GO:0002213,GO:0005506,GO:0016020,GO:0016021,GO:0016709,GO:0020037,GO:0042343	defense response to insect|iron ion binding|membrane|integral component of membrane|oxidoreductase activity, acting on paired donors, with incorporation or reduction of molecular oxygen, NAD(P)H as one donor, and incorporation of one atom of oxygen|heme binding|indole glucosinolate metabolic process
AT1G66550	3.15897	6.31795	0	0.0298277	-5.0672	0.00614727	0.0157699	Down	0	0	0	0.153627	0.110057	0.253438	WRKY67	Araport:AT1G66550,TAIR:AT1G66550,GeneID:842973	member of WRKY Transcription Factor; Group III	WRKY DNA-binding protein 67	WRKY	GO:0003700,GO:0005634,GO:0043565,GO:0044212	DNA-binding transcription factor activity|nucleus|sequence-specific DNA binding|transcription regulatory region DNA binding
AT1G66700	35.6331	56.6412	14.625	0.258403	-1.95231	4.77e-05	0.000184808	Down	0.291398	0.127858	0.250079	0.967003	0.68193	1.0768	PXMT1	Araport:AT1G66700,TAIR:AT1G66700,GeneID:842988	A member of the Arabidopsis SABATH methyltransferase gene family. Encodes PXMT1, a methyltransferase that methylates 1,7-paraxanthine.	S-adenosyl-L-methionine-dependent methyltransferases superfamily protein		GO:0002238,GO:0007275,GO:0008168,GO:0009416,GO:0009617,GO:0009751,GO:0010029,GO:0035195,GO:0042742,GO:0046872,GO:0080027,GO:1900140,GO:2000280	response to molecule of fungal origin|multicellular organism development|methyltransferase activity|response to light stimulus|response to bacterium|response to salicylic acid|regulation of seed germination|gene silencing by miRNA|defense response to bacterium|metal ion binding|response to herbivore|regulation of seedling development|regulation of root development
AT1G66760	254.237	491.848	16.6256	0.0338562	-4.88444	7.18e-15	7e-14	Down	0.320872	0.140222	0.0527431	6.11839	5.1283	4.6329	F4N21.11	Araport:AT1G66760,TAIR:AT1G66760,GeneID:842994		MATE efflux family protein		GO:0006855,GO:0009611,GO:0015238,GO:0015297,GO:0016021	drug transmembrane transport|response to wounding|drug transmembrane transporter activity|antiporter activity|integral component of membrane
AT1G66830	59.4589	90.7876	28.1301	0.309114	-1.69379	1.36e-05	5.73e-05	Down	0.160438	0.238843	0.241365	0.985993	0.477196	0.715202	F4N21.23	Araport:AT1G66830,TAIR:AT1G66830,GeneID:843001		Leucine-rich repeat protein kinase family protein
AT1G66870	4.51938	8.69677	0.341993	0.042459	-4.55779	0.00660043	0.0167878	Down	0	0	0.0155352	0.0750893	0.24207	0.0891896	F4N21.2	Araport:AT1G66870,TAIR:AT1G66870,GeneID:843005		Carbohydrate-binding X8 domain superfamily protein		GO:0005576,GO:0005886,GO:0005975,GO:0006952,GO:0009505,GO:0031225,GO:0042973,GO:0046658,GO:0071555	extracellular region|plasma membrane|carbohydrate metabolic process|defense response|plant-type cell wall|anchored component of membrane|glucan endo-1,3-beta-D-glucosidase activity|anchored component of plasma membrane|cell wall organization
AT1G66880	5935.31	8303.1	3567.52	0.429669	-1.2187	5.59e-23	8.22e-22	Down	17.6221	17.2234	13.2677	33.7374	39.2554	44.1797	F4N21.1	Araport:AT1G66880,TAIR:AT1G66880,GeneID:843006		Protein kinase superfamily protein
AT1G66940	1433.12	890.543	1975.7	2.21877	1.14976	6.53e-30	1.26e-28	Up	28.8869	26.2951	25.7576	12.5852	12.3024	13.3009	T4O24.1	Araport:AT1G66940,TAIR:AT1G66940,GeneID:843012		kinase-like protein
AT1G66960	502.394	798.69	206.098	0.257998	-1.95457	0.00025614	0.000877601	Down	1.34591	2.42462	0.627453	5.5648	4.97186	7.37908	LUP5	Araport:AT1G66960,TAIR:AT1G66960,GeneID:843014		Terpenoid cyclases family protein		GO:0016104,GO:0042300	triterpenoid biosynthetic process|beta-amyrin synthase activity
AT1G67000	407.703	555.37	260.036	0.46863	-1.09348	6.63e-10	4.55e-09	Down	2.17594	1.91227	1.5375	4.00155	4.69931	3.82642	F1O19.18	Araport:AT1G67000,TAIR:AT1G67000,GeneID:843018		Protein kinase superfamily protein
AT1G67040	70.3897	38.16	102.619	2.68005	1.42226	1.22e-05	5.2e-05	Up	0.671701	0.671105	0.776287	0.286529	0.205267	0.337633	TRM22	Araport:AT1G67040,TAIR:AT1G67040,GeneID:843024		DnaA initiator-associating protein
AT1G67070	53.9414	75.3605	32.5223	0.431548	-1.21241	0.00127427	0.00382733	Down	0.312309	0.347898	0.384131	1.08219	0.798072	0.651101	DIN9	Araport:AT1G67070,TAIR:AT1G67070,GeneID:843027	Encodes a protein with phosphomannose isomerase activity that is involved in synthesis of ascorbic acid. Expression is induced after 24 hours of dark treatment, in senescing leaves and treatment with exogenous photosynthesis inhibitor. Induction of gene expression was suppressed in excised leaves supplied with sugar. The authors suggest that the gene's expression pattern is responding to the leve…	Mannose-6-phosphate isomerase, type I		GO:0000032,GO:0004476,GO:0006486,GO:0008270,GO:0009298,GO:0009646,GO:0009744,GO:0010043,GO:0019853,GO:0033591,GO:0046680,GO:0046686	cell wall mannoprotein biosynthetic process|mannose-6-phosphate isomerase activity|protein glycosylation|zinc ion binding|GDP-mannose biosynthetic process|response to absence of light|response to sucrose|response to zinc ion|L-ascorbic acid biosynthetic process|response to L-ascorbic acid|response to DDT|response to cadmium ion	path:ath00051,path:ath00520	Fructose and mannose metabolism|Amino sugar and nucleotide sugar metabolism
AT1G67230	4208.31	2332.84	6083.79	2.60796	1.38292	9.1e-36	2.16e-34	Up	31.3092	35.1892	33.5147	11.4278	13.3482	15.3704	LINC1	Araport:AT1G67230,TAIR:AT1G67230,GeneID:843043	Encodes a nuclear coiled-coil protein related to the carrot peripheral nuclear protein NMCP1 that is involved in the determination of plant nuclear structure.	little nuclei1		GO:0000789,GO:0005634,GO:0005635,GO:0005652,GO:0005654,GO:0005829,GO:0006997,GO:0031965,GO:0034399,GO:0097298	cytoplasmic chromatin|nucleus|nuclear envelope|nuclear lamina|nucleoplasm|cytosol|nucleus organization|nuclear membrane|nuclear periphery|regulation of nucleus size
AT1G67265	94.3891	59.2149	129.563	2.17904	1.12369	0.00341271	0.00929138	Up	4.40631	5.5031	3.08512	1.72315	1.03267	3.5424	RTFL21	Araport:AT1G67265,TAIR:AT1G67265,GeneID:5007837		ROTUNDIFOLIA like 21
AT1G67360	4554.54	7708.78	1400.29	0.181642	-2.46083	7.74e-145	1.33e-142	Down	24.4074	22.6046	24.769	141.819	119.333	153.499	F1N21.18	Araport:AT1G67360,TAIR:AT1G67360,GeneID:843057		Rubber elongation factor protein (REF)		GO:0005773,GO:0005783,GO:0005811,GO:0009555,GO:0034389,GO:0045927,GO:0080186,GO:1902584	vacuole|endoplasmic reticulum|lipid droplet|pollen development|lipid droplet organization|positive regulation of growth|developmental vegetative growth|positive regulation of response to water deprivation
AT1G67600	18.6085	29.0605	8.15644	0.280999	-1.83137	0.0100157	0.0243193	Down	0.217315	0.0943589	0.129191	0.999108	0.383439	0.264893	F12A21.27	Araport:AT1G67600,TAIR:AT1G67600,GeneID:843081		Acid phosphatase/vanadium-dependent haloperoxidase-related protein
AT1G67710	175.173	95.6021	254.743	2.65482	1.40861	5.66e-09	3.59e-08	Up	2.29455	2.59206	2.43668	1.0068	0.632806	1.25978	ARR11	Araport:AT1G67710,TAIR:AT1G67710,GeneID:843096	Encodes an Arabidopsis response regulator (ARR) protein that acts in concert with other type-B ARRs in the cytokinin signaling pathway.	response regulator 11	ARR-B	GO:0000156,GO:0003677,GO:0003700,GO:0005634,GO:0009735,GO:0009736,GO:0010082	phosphorelay response regulator activity|DNA binding|DNA-binding transcription factor activity|nucleus|response to cytokinin|cytokinin-activated signaling pathway|regulation of root meristem growth	path:ath04075	Plant hormone signal transduction
AT1G67810	435.896	618.238	253.553	0.410295	-1.28527	5.41e-15	5.31e-14	Down	5.45648	4.03407	4.4524	10.6786	11.436	13.4819	SUFE2	Araport:AT1G67810,TAIR:AT1G67810,GeneID:843107	Encodes a protein capable of stimulating the cysteine desulfurase activity of CpNifS (AT1G08490) in vitro. SufE2:GFP localizes to the chloroplasts where it is likely to play a role in iron-sulfur cluster assembly. Transcript levels for this gene are high in the pollen relative to other organs based on RT-PCR analysis.	sulfur E2		GO:0008047,GO:0009507,GO:0016226,GO:0051176	enzyme activator activity|chloroplast|iron-sulfur cluster assembly|positive regulation of sulfur metabolic process
AT1G67856	188.895	349.853	27.9374	0.0800737	-3.64253	1.06e-41	2.94e-40	Down	1.2127	0.68931	1.16098	11.368	15.017	13.6173	AT1G67856	Araport:AT1G67856,TAIR:AT1G67856,GeneID:6240476		RING/U-box superfamily protein		GO:0006970,GO:0009651,GO:0009687,GO:0009688,GO:0009739,GO:0010200,GO:0016021,GO:0016567,GO:0016740,GO:0046872	response to osmotic stress|response to salt stress|abscisic acid metabolic process|abscisic acid biosynthetic process|response to gibberellin|response to chitin|integral component of membrane|protein ubiquitination|transferase activity|metal ion binding
AT1G67900	2920.77	1522.23	4319.31	2.83622	1.50397	2.67e-40	7.16e-39	Up	18.5438	15.7081	18.2176	7.04195	5.26901	7.10925	T23K23.25	Araport:AT1G67900,TAIR:AT1G67900,GeneID:843118		Phototropic-responsive NPH3 family protein		GO:0016567	protein ubiquitination
AT1G67910	817.692	154.73	1480.65	9.57982	3.26	3.03e-133	4.38e-131	Up	25.3921	26.5339	25.5556	2.50676	2.89809	3.06304	T23K23.24	Araport:AT1G67910,TAIR:AT1G67910,GeneID:843119		hypothetical protein
AT1G67920	221.156	310.849	131.463	0.42314	-1.24079	1.28e-07	7.02e-07	Down	6.86315	4.06992	3.94158	11.3562	11.1596	14.3465	T23K23.23	Araport:AT1G67920,TAIR:AT1G67920,GeneID:843120		hypothetical protein
AT1G67970	2355.34	3172.82	1537.86	0.484764	-1.04465	1.45e-27	2.57e-26	Down	20.5037	20.9	18.99	41.7878	44.5422	43.9305	HSFA8	Araport:AT1G67970,TAIR:AT1G67970,GeneID:843125	member of Heat Stress Transcription Factor (Hsf) family	heat shock transcription factor A8	HSF	GO:0000978,GO:0003700,GO:0005634,GO:0005737,GO:0034605,GO:0043565,GO:0061408	RNA polymerase II proximal promoter sequence-specific DNA binding|DNA-binding transcription factor activity|nucleus|cytoplasm|cellular response to heat|sequence-specific DNA binding|positive regulation of transcription from RNA polymerase II promoter in response to heat stress
AT1G67980	36.3596	16.4162	56.303	3.40306	1.76683	0.00455727	0.0120843	Up	1.19355	1.70757	0.494795	0.219228	0.107082	0.729896	CCOAMT	Araport:AT1G67980,TAIR:AT1G67980,GeneID:843126	Encodes S-adenosyl-L-methionine: transcaffeoyl Coenzyme A 3-O-methyltransferase.	caffeoyl-CoA 3-O-methyltransferase		GO:0005829,GO:0008757,GO:0009809,GO:0042409,GO:0046872	cytosol|S-adenosylmethionine-dependent methyltransferase activity|lignin biosynthetic process|caffeoyl-CoA O-methyltransferase activity|metal ion binding	path:ath00360,path:ath00940,path:ath00941,path:ath00945	Phenylalanine metabolism|Phenylpropanoid biosynthesis|Flavonoid biosynthesis|Stilbenoid, diarylheptanoid and gingerol biosynthesis
AT1G68020	1759.27	812.134	2706.4	3.3315	1.73617	4.68e-77	2.84e-75	Up	17.0666	17.0179	17.1213	5.56288	4.95016	5.58666	ATTPS6	Araport:AT1G68020,TAIR:AT1G68020,GeneID:843130	Encodes an enzyme putatively involved in trehalose biosynthesis. The protein has a trehalose synthase (TPS)-like domain and a trehalose phosphatase (TPP)-like domain. It can complement a yeast mutant lacking both of these activities suggesting that this is a bifunctional enzyme.	UDP-Glycosyltransferase / trehalose-phosphatase family protein		GO:0003825,GO:0004805,GO:0005737,GO:0005992,GO:0070413	alpha,alpha-trehalose-phosphate synthase (UDP-forming) activity|trehalose-phosphatase activity|cytoplasm|trehalose biosynthetic process|trehalose metabolism in response to stress	path:ath00500	Starch and sucrose metabolism
AT1G68110	110.525	54.8203	166.23	3.04778	1.60776	1.7e-07	9.19e-07	Up	2.68548	2.65034	2.49534	0.933769	1.2041	0.539152	T23K23.4	Araport:AT1G68110,TAIR:AT1G68110,GeneID:843139		ENTH/ANTH/VHS superfamily protein		GO:0004016,GO:0005484,GO:0005545,GO:0005794,GO:0005905,GO:0006897,GO:0016192,GO:0030136,GO:0030276,GO:0048268,GO:0050832	adenylate cyclase activity|SNAP receptor activity|1-phosphatidylinositol binding|Golgi apparatus|clathrin-coated pit|endocytosis|vesicle-mediated transport|clathrin-coated vesicle|clathrin binding|clathrin coat assembly|defense response to fungus
AT1G68190	1139.54	483.208	1795.88	3.7217	1.89596	6.21e-44	1.8e-42	Up	20.5456	21.0883	22.0041	4.98711	6.91902	5.94445	BBX27	Araport:AT1G68190,TAIR:AT1G68190,GeneID:843148		B-box zinc finger family protein		GO:0003700,GO:0005634,GO:0006355,GO:0008270	DNA-binding transcription factor activity|nucleus|regulation of transcription, DNA-templated|zinc ion binding
AT1G68320	40.5741	1.92274	79.2255	41.0929	5.36082	1.51e-13	1.37e-12	Up	1.28231	1.72825	1.02804	0	0.0362008	0.0666901	MYB62	Araport:AT1G68320,TAIR:AT1G68320,GeneID:843161	putative transcription factor: R2R3-MYB transcription family. Involved in regulation of phosphate starvation responses and gibberellic acid biosynthesis.	myb domain protein 62	MYB	GO:0003700,GO:0005634,GO:0009686,GO:0009740,GO:0009751,GO:0010015,GO:0010373,GO:0016036,GO:0043565,GO:0045892,GO:0055062	DNA-binding transcription factor activity|nucleus|gibberellin biosynthetic process|gibberellic acid mediated signaling pathway|response to salicylic acid|root morphogenesis|negative regulation of gibberellin biosynthetic process|cellular response to phosphate starvation|sequence-specific DNA binding|negative regulation of transcription, DNA-templated|phosphate ion homeostasis
AT1G68330	84.2726	30.8979	137.647	4.4726	2.16111	7.69e-11	5.7e-10	Up	1.90477	2.11997	1.29413	0.382968	0.49384	0.366433	T22E19.4	Araport:AT1G68330,TAIR:AT1G68330,GeneID:843162		membrane-associated kinase regulator
AT1G68400	872.169	182.668	1561.67	8.55621	3.09697	9.88e-132	1.39e-129	Up	12.9664	12.3731	13.5205	1.69337	1.56351	1.49712	T2E12.5	Araport:AT1G68400,TAIR:AT1G68400,GeneID:843169		leucine-rich repeat transmembrane protein kinase family protein
AT1G68440	727.969	170.847	1285.09	7.51316	2.90942	7.08e-99	5.93e-97	Up	16.4537	18.0336	15.7136	2.63282	2.05255	2.31219	T2E12.1	Araport:AT1G68440,TAIR:AT1G68440,GeneID:843173		transmembrane protein
AT1G68520	18861.7	6591.33	31132.1	4.72367	2.23991	1.93e-183	5.14e-181	Up	263.997	266.599	272.466	58.1868	60.2558	59.3319	BBX14	Araport:AT1G68520,TAIR:AT1G68520,GeneID:843181		B-box type zinc finger protein with CCT domain-containing protein	CO-like	GO:0003700,GO:0005634,GO:0006355,GO:0008270	DNA-binding transcription factor activity|nucleus|regulation of transcription, DNA-templated|zinc ion binding
AT1G68570	628.305	1037.65	218.956	0.210906	-2.24533	9.21e-30	1.76e-28	Down	2.64224	2.67477	1.72557	11.5173	8.46024	15.1755	AtNPF3.1	Araport:AT1G68570,TAIR:AT1G68570,GeneID:843186		Major facilitator superfamily protein		GO:0005886,GO:0010336,GO:0015333,GO:0016021,GO:0035673,GO:0042128,GO:0097708,GO:1904680	plasma membrane|gibberellic acid homeostasis|peptide:proton symporter activity|integral component of membrane|oligopeptide transmembrane transporter activity|nitrate assimilation|intracellular vesicle|peptide transmembrane transporter activity
AT1G68580	2954.85	1712.33	4197.38	2.45153	1.29368	1.72e-43	4.91e-42	Up	33.8364	34.3251	31.2616	15.165	13.7483	13.5235	F24J5.18	Araport:AT1G68580,TAIR:AT1G68580,GeneID:843187		Agenet and bromo-adjacent homology (BAH) domain-containing protein		GO:0005773,GO:0040008,GO:0042803	vacuole|regulation of growth|protein homodimerization activity
AT1G68585	503.157	322.114	684.199	2.12144	1.08505	2.24e-07	1.2e-06	Up	21.4187	19.1316	17.2663	13.4814	6.14871	9.03421	AT1G68585	Araport:AT1G68585,TAIR:AT1G68585,GeneID:843188		hypothetical protein
AT1G68620	76.3215	138.619	14.0241	0.101095	-3.30621	1.8e-15	1.84e-14	Down	0.282405	0.278802	0.0605905	2.53326	1.63648	2.29006	F24J5.14	Araport:AT1G68620,TAIR:AT1G68620,GeneID:843192		alpha/beta-Hydrolases superfamily protein		GO:0052689	carboxylic ester hydrolase activity
AT1G68640	48.1096	21.5122	74.7069	3.47021	1.79502	3.72e-06	1.71e-05	Up	0.775157	0.984483	0.938099	0.250579	0.256447	0.307081	PAN	Araport:AT1G68640,TAIR:AT1G68640,GeneID:843194	Encodes bZIP-transcription factor. Mutant plants have extra floral organs. PAN is essential for AG activation in early flowers of short-day-grown plants.	bZIP transcription factor family protein	bZIP	GO:0003677,GO:0003700,GO:0005634,GO:0006351,GO:0009909,GO:0043565	DNA binding|DNA-binding transcription factor activity|nucleus|transcription, DNA-templated|regulation of flower development|sequence-specific DNA binding	path:ath04075	Plant hormone signal transduction
AT1G68690	363.3	542.629	183.971	0.338987	-1.5607	1.39e-17	1.6e-16	Down	1.18502	1.40844	0.920443	3.25625	3.67544	3.91018	PERK9	Araport:AT1G68690,TAIR:AT1G68690,GeneID:3767664	Encodes a member of the proline-rich extensin-like receptor kinase (PERK) family. This family consists of 15 predicted receptor kinases (PMID: 15653807).	Protein kinase superfamily protein
AT1G68780	371.958	202.053	541.863	2.6814	1.42298	6.06e-20	7.87e-19	Up	5.65662	5.23606	6.12977	2.15855	2.09652	2.39336	F14K14.11	Araport:AT1G68780,TAIR:AT1G68780,GeneID:843209		RNI-like superfamily protein		GO:0005886,GO:0009507,GO:0009610,GO:0044403	plasma membrane|chloroplast|response to symbiotic fungus|symbiont process
AT1G68795	23.6648	40.1776	7.152	0.178164	-2.48872	0.000146921	0.000526454	Down	0.128013	0.0444669	0.282665	1.28218	0.655027	0.748991	CLE12	Araport:AT1G68795,TAIR:AT1G68795,GeneID:843211	Member of a large family of putative ligands homologous to the Clavata3 gene. Consists of a single exon.	CLAVATA3/ESR-RELATED 12		GO:0005615,GO:0007275,GO:0033612,GO:0045168,GO:0048046	extracellular space|multicellular organism development|receptor serine/threonine kinase binding|cell-cell signaling involved in cell fate commitment|apoplast
AT1G68840	4030.06	1135.91	6924.22	6.09895	2.60856	3.55e-71	1.94e-69	Up	73.8508	78.1739	75.0946	14.9544	14.4861	9.38538	RAV2	Araport:AT1G68840,TAIR:AT1G68840,GeneID:843216	Rav2 is part of a complex that has been named `regulator of the (H+)-ATPase of the vacuolar and endosomal membranes' (RAVE)	related to ABI3/VP1 2	RAV	GO:0003700,GO:0005634,GO:0009873,GO:0043565,GO:0045892	DNA-binding transcription factor activity|nucleus|ethylene-activated signaling pathway|sequence-specific DNA binding|negative regulation of transcription, DNA-templated
AT1G68870	52.3781	31.55	73.2062	2.33474	1.22326	0.00651594	0.0166063	Up	1.78082	3.28329	2.4082	0.70852	1.81278	0.801492	SOFL2	Araport:AT1G68870,TAIR:AT1G68870,GeneID:843219	AtSOFL1 acts redundantly with AtSOFL2 as positive regulator of cytokinin levels and cytokinin-mediated development.	SOB five-like 2
AT1G69040	956.332	606.268	1306.4	2.1561	1.10842	1.33e-21	1.85e-20	Up	12.5892	12.6282	13.0099	5.65513	6.43013	6.45871	ACR4	Araport:AT1G69040,TAIR:AT1G69040,GeneID:843236	ACT-domain containing protein involved in feedback regulation of amino acid metabolism	ACT domain repeat 4		GO:0009506	plasmodesma
AT1G69160	217.871	70.7337	365.008	5.15921	2.36715	6.21e-21	8.38e-20	Up	3.132	4.84266	5.87775	1.0787	0.876109	0.856656	F4N2.12	Araport:AT1G69160,TAIR:AT1G69160,GeneID:843247		suppressor		GO:0005886,GO:0009734,GO:0010929,GO:0060918	plasma membrane|auxin-activated signaling pathway|positive regulation of auxin mediated signaling pathway|auxin transport
AT1G69200	735.26	983.204	487.316	0.496001	-1.01158	4e-12	3.28e-11	Down	6.79724	4.98644	6.05192	11.6645	13.5607	12.3354	FLN2	Araport:AT1G69200,TAIR:AT1G69200,GeneID:843251	Encodes a fructokinase-like protein (AT3G54090/FLN1, AT1G69200/FLN2), a member of the pfkB-carbohydrate kinase family. FLN1 and FLN2 are potential plastidial thioredoxin z (TRX z) targets. Mutants display mutant chloroplast development, general plant growth and development defects and defects in PEP-dependent transcription.	fructokinase-like protein		GO:0000427,GO:0005737,GO:0006355,GO:0008865,GO:0009295,GO:0009658,GO:0009662,GO:0019200,GO:0042644,GO:0042793	plastid-encoded plastid RNA polymerase complex|cytoplasm|regulation of transcription, DNA-templated|fructokinase activity|nucleoid|chloroplast organization|etioplast organization|carbohydrate kinase activity|chloroplast nucleoid|plastid transcription
AT1G69220	2021.91	1252.04	2791.79	2.2292	1.15653	1.58e-32	3.31e-31	Up	20.5819	22.7805	21.9347	10.0303	9.4498	11.2131	SIK1	Araport:AT1G69220,TAIR:AT1G69220,GeneID:843253	Encodes a putative serine/threonine kinase (SIK1).	Protein kinase superfamily protein		GO:0000165,GO:0004674,GO:0005524,GO:0005634,GO:0005737,GO:0005829,GO:0023014,GO:0031028,GO:0031098,GO:0032147,GO:0044732,GO:0048812,GO:1902412,GO:1902542	MAPK cascade|protein serine/threonine kinase activity|ATP binding|nucleus|cytoplasm|cytosol|signal transduction by protein phosphorylation|septation initiation signaling|stress-activated protein kinase signaling cascade|activation of protein kinase activity|mitotic spindle pole body|neuron projection morphogenesis|regulation of mitotic cytokinesis|regulation of protein localization to mitotic spi…
AT1G69260	83.0137	153.723	12.3042	0.0801548	-3.64107	1.27e-20	1.7e-19	Down	0.226795	0.206798	0.0866744	1.89919	2.68612	2.18394	AFP1	Araport:AT1G69260,TAIR:AT1G69260,GeneID:843257		ABI five binding protein		GO:0005634,GO:0009738,GO:0045892	nucleus|abscisic acid-activated signaling pathway|negative regulation of transcription, DNA-templated
AT1G69370	666.114	931.619	400.61	0.430278	-1.21666	9.19e-20	1.19e-18	Down	7.46788	6.7907	7.18988	17.7563	18.3776	15.9475	CM3	Araport:AT1G69370,TAIR:AT1G69370,GeneID:843269	Encodes chorismate mutase 3 (CM3).	chorismate mutase 3		GO:0000162,GO:0004106,GO:0009073,GO:0009507,GO:0009536,GO:0042742,GO:0046417	tryptophan biosynthetic process|chorismate mutase activity|aromatic amino acid family biosynthetic process|chloroplast|plastid|defense response to bacterium|chorismate metabolic process	path:ath00400	Phenylalanine, tyrosine and tryptophan biosynthesis
AT1G69440	381.67	556.353	206.988	0.371768	-1.42752	2.77e-16	2.97e-15	Down	1.43988	1.46622	1.15249	3.95766	3.06958	4.43668	AGO7	Araport:AT1G69440,TAIR:AT1G69440,GeneID:843276	Encodes ARGONAUTE7, a member of the ARGONAUTE family, characterised by the presence of PAZ and PIWI domains. Involved in the regulation of developmental timing. Required for the accumulation of TAS3 ta-siRNAs but not for accumulation of miR171, miR173, miR390 or mi391. Localized in mature rosette leaves and floral buds.	Argonaute family protein		GO:0003723,GO:0005737,GO:0006417,GO:0010050,GO:0010267,GO:0010492,GO:0010599,GO:0035195,GO:0040034,GO:0051607,GO:0060145	RNA binding|cytoplasm|regulation of translation|vegetative phase change|production of ta-siRNAs involved in RNA interference|maintenance of shoot apical meristem identity|production of lsiRNA involved in RNA interference|gene silencing by miRNA|regulation of development, heterochronic|defense response to virus|viral gene silencing in virus induced gene silencing
AT1G69490	124.929	31.1963	218.661	7.03789	2.81514	2.41e-18	2.89e-17	Up	4.57441	3.95674	3.26147	0.285003	0.727371	0.740516	NAP	Araport:AT1G69490,TAIR:AT1G69490,GeneID:843282	Encodes a member of the NAC transcription factor gene family. It is expressed in floral primordia and upregulated by AP3 and PI. Its expression is associated with leaf senescence.	NAC-like, activated by AP3/PI	NAC	GO:0003677,GO:0003700,GO:0005634,GO:0009793,GO:0009825,GO:0009835,GO:0009908,GO:0010150	DNA binding|DNA-binding transcription factor activity|nucleus|embryo development ending in seed dormancy|multidimensional cell growth|fruit ripening|flower development|leaf senescence
AT1G69530	701.452	1174.42	228.481	0.194584	-2.36154	5.77e-08	3.28e-07	Down	3.34876	3.30683	3.30846	15.055	27.1386	10.695	EXPA1	Araport:AT1G69530,TAIR:AT1G69530,GeneID:843288	Member of Alpha-Expansin Gene Family. Naming convention from the Expansin Working Group (Kende et al, Plant Mol Bio). Involved in the formation of nematode-induced syncytia in roots of Arabidopsis thaliana.	expansin A1
AT1G69570	101.084	63.9875	138.181	2.1551	1.10775	0.000146058	0.00052373	Up	2.03123	1.49271	1.31622	0.832837	0.596638	0.9274	AT1G69570	Araport:AT1G69570,TAIR:AT1G69570,GeneID:843293		Dof-type zinc finger DNA-binding family protein	Dof	GO:0003677,GO:0003700,GO:0005634,GO:0006355,GO:0009908,GO:0043565,GO:0046872,GO:0048577,GO:0048579	DNA binding|DNA-binding transcription factor activity|nucleus|regulation of transcription, DNA-templated|flower development|sequence-specific DNA binding|metal ion binding|negative regulation of short-day photoperiodism, flowering|negative regulation of long-day photoperiodism, flowering
AT1G69610	329.457	578.969	79.9454	0.138146	-2.85573	2.53e-51	8.6e-50	Down	0.878365	0.756144	0.64218	6.52773	5.37721	5.35335	F24J1.24	Araport:AT1G69610,TAIR:AT1G69610,GeneID:843297		zinc finger FYVE domain protein, putative (DUF1666)
AT1G69700	260.58	162.565	358.595	2.20944	1.14368	1.38e-09	9.22e-09	Up	8.5667	8.90129	9.16194	3.48385	4.71917	4.39546	HVA22C	Araport:AT1G69700,TAIR:AT1G69700,GeneID:843306	Part of the AtHVA22 family. Protein expression is ABA- and stress-inducible.	HVA22 homologue C		GO:0009414,GO:0009506,GO:0009737,GO:0016021,GO:0042538	response to water deprivation|plasmodesma|response to abscisic acid|integral component of membrane|hyperosmotic salinity response
AT1G69760	1079.2	382.174	1776.23	4.65238	2.21797	1.82e-62	8.15e-61	Up	26.3955	21.8175	27.4974	5.08261	6.05176	5.88094	T6C23.4	Araport:AT1G69760,TAIR:AT1G69760,GeneID:843312		suppressor SRP40-like protein
AT1G69780	733.026	184.509	1281.54	6.95395	2.79783	2.68e-102	2.34e-100	Up	17.4903	19.0032	18.2922	2.65528	2.82298	2.76804	ATHB13	Araport:AT1G69780,TAIR:AT1G69780,GeneID:843314	Encodes a homeodomain leucine zipper class I (HD-Zip I) protein.	Homeobox-leucine zipper protein family	HD-ZIP	GO:0003700,GO:0005634,GO:0009744,GO:0009965,GO:0043565,GO:0048826,GO:0080022	DNA-binding transcription factor activity|nucleus|response to sucrose|leaf morphogenesis|sequence-specific DNA binding|cotyledon morphogenesis|primary root development
AT1G69850	4111.52	1392.97	6830.08	4.90402	2.29396	5.51e-151	9.97e-149	Up	62.9476	65.6742	60.3408	12.8782	13.3084	14.1403	NRT1:2	Araport:AT1G69850,TAIR:AT1G69850,GeneID:843321	Encodes an inducible component of low-affinity nitrate uptake. mRNA found primarily in root hairs and the epidermis of roots. It also acts as an ABA importer at the site of ABA biosynthesis and is important for the regulation of stomatal aperture in inflorescence stems.	nitrate transporter 1:2		GO:0005886,GO:0009624,GO:0010119,GO:0015333,GO:0016021,GO:0035673,GO:0042128,GO:0080168,GO:0090440,GO:1904680	plasma membrane|response to nematode|regulation of stomatal movement|peptide:proton symporter activity|integral component of membrane|oligopeptide transmembrane transporter activity|nitrate assimilation|abscisic acid transport|abscisic acid transmembrane transporter activity|peptide transmembrane transporter activity
AT1G69890	3346.32	1653.55	5039.08	3.0485	1.6081	2.09e-45	6.25e-44	Up	70.0204	71.315	71.4025	26.8343	25.5237	20.5282	T17F3.8	Araport:AT1G69890,TAIR:AT1G69890,GeneID:843325		actin cross-linking protein (DUF569)
AT1G70000	201.501	290.563	112.438	0.386426	-1.37174	1.75e-08	1.05e-07	Down	1.12922	1.53251	1.7396	3.75142	3.00257	5.22411	F20P5.26	Araport:AT1G70000,TAIR:AT1G70000,GeneID:843337		myb-like transcription factor family protein	MYB_related	GO:0000122,GO:0000976,GO:0003700,GO:0005634,GO:0006355,GO:0008270,GO:0009646,GO:0009651,GO:0009723,GO:0009733,GO:0009737,GO:0009739,GO:0009744,GO:0009751,GO:0009753,GO:0010150,GO:0010252,GO:0030307,GO:0045892,GO:0046686,GO:0048366,GO:0048527,GO:0090697,GO:2000469	negative regulation of transcription by RNA polymerase II|transcription regulatory region sequence-specific DNA binding|DNA-binding transcription factor activity|nucleus|regulation of transcription, DNA-templated|zinc ion binding|response to absence of light|response to salt stress|response to ethylene|response to auxin|response to abscisic acid|response to gibberellin|response to sucrose|respons…
AT1G70090	4319.12	2225.6	6412.63	2.88235	1.52724	2.61e-55	9.91e-54	Up	66.9829	69.991	67.0243	24.9079	26.2688	22.7506	LGT8	Araport:AT1G70090,TAIR:AT1G70090,GeneID:843345	Encodes a protein with putative galacturonosyltransferase activity.	glucosyl transferase family 8		GO:0000139,GO:0005794,GO:0016021,GO:0045489,GO:0047262,GO:0071555	Golgi membrane|Golgi apparatus|integral component of membrane|pectin biosynthetic process|polygalacturonate 4-alpha-galacturonosyltransferase activity|cell wall organization
AT1G70100	1591.49	933.741	2249.24	2.40844	1.2681	1.34e-40	3.63e-39	Up	18.8498	19.742	19.2717	8.42256	7.88177	8.85837	F20P5.17	Araport:AT1G70100,TAIR:AT1G70100,GeneID:843346		neurofilament heavy protein		GO:0005737,GO:0005874	cytoplasm|microtubule
AT1G70130	28.7459	57.4917	0	0.00328537	-8.24973	7.85e-11	5.81e-10	Down	0	0	0	0.562749	0.671915	0.66017	F20P5.15	Araport:AT1G70130,TAIR:AT1G70130,GeneID:843349		Concanavalin A-like lectin protein kinase family protein
AT1G70170	9.03603	16.6952	1.37685	0.0821269	-3.606	0.000744863	0.00234942	Down	0.0152643	0.0318135	0.0155562	0.195495	0.258557	0.342354	MMP	Araport:AT1G70170,TAIR:AT1G70170,GeneID:843353	mutant has Late flowering; Early senescence; Matrix Metalloproteinase	matrix metalloproteinase		GO:0004222,GO:0005886,GO:0007275,GO:0008270,GO:0009651,GO:0009753,GO:0031012,GO:0031225,GO:0046686,GO:0080186,GO:1900056,GO:2000028	metalloendopeptidase activity|plasma membrane|multicellular organism development|zinc ion binding|response to salt stress|response to jasmonic acid|extracellular matrix|anchored component of membrane|response to cadmium ion|developmental vegetative growth|negative regulation of leaf senescence|regulation of photoperiodism, flowering
AT1G70230	882.212	585.421	1179	2.01416	1.01018	4.41e-16	4.64e-15	Up	14.2225	13.5156	16.7511	7.51694	7.48821	8.11904	TBL27	Araport:AT1G70230,TAIR:AT1G70230,GeneID:843359	Encodes a member of the TBL (TRICHOME BIREFRINGENCE-LIKE) gene family containing a plant-specific DUF231 (domain of unknown function) domain. A putative xyloglucan O-acetyltransferase. TBL gene family has 46 members, two of which (TBR/AT5G06700 and TBL3/AT5G01360) have been shown to be involved in the synthesis and deposition of secondary wall cellulose, presumably by influencing the esterificati…	TRICHOME BIREFRINGENCE-LIKE 27		GO:0000139,GO:0005794,GO:0010411,GO:0016021,GO:0016413	Golgi membrane|Golgi apparatus|xyloglucan metabolic process|integral component of membrane|O-acetyltransferase activity
AT1G70270	16.1552	2.87881	29.4316	10.1923	3.3494	4.08e-05	0.000159673	Up	0.684981	0.747801	1.4294	0.192808	0.0690633	0.0318075	F17O7.20	Araport:AT1G70270,TAIR:AT1G70270,GeneID:843363		transcription factor
AT1G70290	12484.5	1902.13	23066.9	12.1327	3.60083	0	0	Up	157.891	149.723	157.376	12.3994	14.4262	13.2091	TPS8	Araport:AT1G70290,TAIR:AT1G70290,GeneID:843365	Encodes an enzyme putatively involved in trehalose biosynthesis. Though the protein has both trehalose-6-phosphate synthase (TPS)-like and trehalose-6-phosphate phosphatase (TPP)-like domains, neither activity has been detected in enzymatic assays nor has the protein been able to complement yeast TPS or TPP mutants.	trehalose-6-phosphatase synthase S8		GO:0005737,GO:0005992,GO:0016311,GO:0016757,GO:0070413	cytoplasm|trehalose biosynthetic process|dephosphorylation|transferase activity, transferring glycosyl groups|trehalose metabolism in response to stress	path:ath00500	Starch and sucrose metabolism
AT1G70480	1233.41	1716.13	750.704	0.437553	-1.19247	9.49e-26	1.57e-24	Down	8.85173	8.1288	9.76359	22.1956	21.3345	20.397	F24J13.5	Araport:AT1G70480,TAIR:AT1G70480,GeneID:843384		OBP32pep, putative (DUF220)
AT1G70500	8.29331	14.8755	1.71109	0.115086	-3.11921	0.00254626	0.00715254	Down	0.0261699	0.0272713	0.0133352	0.167584	0.221641	0.216916	F24J13.7	Araport:AT1G70500,TAIR:AT1G70500,GeneID:843386		Pectin lyase-like superfamily protein		GO:0004650,GO:0005576,GO:0005975,GO:0009505,GO:0071555	polygalacturonase activity|extracellular region|carbohydrate metabolic process|plant-type cell wall|cell wall organization
AT1G70520	3626.62	1615.24	5638	3.49231	1.80418	7.61e-79	4.76e-77	Up	54.0914	52.4216	51.8807	15.3039	16.9041	15.1756	CRK2	Araport:AT1G70520,TAIR:AT1G70520,GeneID:843389	Encodes a cysteine-rich receptor-like protein kinase.	cysteine-rich RLK (RECEPTOR-like protein kinase) 2
AT1G70530	1787.4	1064.86	2509.94	2.35845	1.23784	1.91e-27	3.36e-26	Up	21.4149	19.161	18.4494	7.89214	9.39901	8.85745	CRK3	Araport:AT1G70530,TAIR:AT1G70530,GeneID:843390	Encodes a cysteine-rich receptor-like protein kinase.	cysteine-rich RLK (RECEPTOR-like protein kinase) 3
AT1G70560	150.641	260.642	40.6406	0.15601	-2.68029	3.5e-27	6.09e-26	Down	0.687299	0.563837	0.521605	3.76014	3.7155	4.43485	TAA1	Araport:AT1G70560,TAIR:AT1G70560,GeneID:843393	TAA1 is involved in the shade-induced production of indole-3-pyruvate (IPA), a precursor to IAA, a biologically active auxin. It is also involved in regulating many aspects of plant growth and development from embryogenesis to flower formation and plays a role in ethylene-mediated signaling. This enzyme can catalyze the formation of IPA from L-tryptophan. Though L-Trp is expected to be the prefer…	tryptophan aminotransferase of Arabidopsis 1		GO:0004021,GO:0004838,GO:0005737,GO:0009641,GO:0009684,GO:0009723,GO:0009908,GO:0009926,GO:0009958,GO:0010078,GO:0010087,GO:0016846,GO:0030170,GO:0042742,GO:0047312,GO:0048364,GO:0048366,GO:0048367,GO:0048467,GO:0050048,GO:0050362,GO:0080097,GO:0080098,GO:0080099,GO:0080100,GO:0080130	L-alanine:2-oxoglutarate aminotransferase activity|L-tyrosine:2-oxoglutarate aminotransferase activity|cytoplasm|shade avoidance|indoleacetic acid biosynthetic process|response to ethylene|flower development|auxin polar transport|positive gravitropism|maintenance of root meristem identity|phloem or xylem histogenesis|carbon-sulfur lyase activity|pyridoxal phosphate binding|defense response to bac…	path:ath00380	Tryptophan metabolism
AT1G70640	1213.48	2254.24	172.711	0.0766963	-3.7047	2.76e-97	2.26e-95	Down	2.86544	1.62099	2.54477	25.837	33.5856	36.4847	F5A18.18	Araport:AT1G70640,TAIR:AT1G70640,GeneID:843401		octicosapeptide/Phox/Bem1p (PB1) domain-containing protein
AT1G70700	16116.4	23592.8	8639.99	0.36623	-1.44918	1.07e-30	2.12e-29	Down	111.463	83.9891	119.207	301.804	324.057	270.691	TIFY7	Araport:AT1G70700,TAIR:AT1G70700,GeneID:843407	JAZ9 is a protein presumed to be involved in jasmonate signaling. JAZ9 transcript levels rise in response to a jasmonate stimulus. JAZ9 can interact with the COI1 F-box subunit of an SCF E3 ubiquitin ligase in a yeast-two-hybrid assay only in the presence of jasmonate-isoleucine (JA-ILE) or coronatine. The Jas domain appears to be important for JAZ9-COI1 interactions in the presence of coronatine…	TIFY domain/Divergent CCT motif family protein		GO:0005634,GO:0006952,GO:0009611,GO:0009753,GO:0031347,GO:2000022	nucleus|defense response|response to wounding|response to jasmonic acid|regulation of defense response|regulation of jasmonic acid mediated signaling pathway	path:ath04075	Plant hormone signal transduction
AT1G70790	388.507	570.156	206.857	0.362896	-1.46237	6.28e-16	6.53e-15	Down	1.78236	2.1243	2.67571	5.79356	6.84713	6.30698	F15H11.4	Araport:AT1G70790,TAIR:AT1G70790,GeneID:843416		Calcium-dependent lipid-binding (CaLB domain) family protein		GO:0005096,GO:0005543,GO:0005634,GO:0005886,GO:0009738,GO:0009789,GO:0043547,GO:0046872	GTPase activator activity|phospholipid binding|nucleus|plasma membrane|abscisic acid-activated signaling pathway|positive regulation of abscisic acid-activated signaling pathway|positive regulation of GTPase activity|metal ion binding
AT1G70800	494.461	702.092	286.831	0.408893	-1.2902	2.67e-16	2.86e-15	Down	6.46164	5.09449	6.62851	15.0352	16.7867	14.6334	EHB1	Araport:AT1G70800,TAIR:AT1G70800,GeneID:843417	Encodes a novel NPH3/phototropin binding factor with a calcium binding domain that negatively affects hypocotyl bending under blue light conditions in Arabidopsis thaliana and may regulate phototropism.	Calcium-dependent lipid-binding (CaLB domain) family protein		GO:0005096,GO:0005543,GO:0005634,GO:0005886,GO:0007275,GO:0009630,GO:0009637,GO:0009638,GO:0009738,GO:0009789,GO:0043547,GO:0046872	GTPase activator activity|phospholipid binding|nucleus|plasma membrane|multicellular organism development|gravitropism|response to blue light|phototropism|abscisic acid-activated signaling pathway|positive regulation of abscisic acid-activated signaling pathway|positive regulation of GTPase activity|metal ion binding
AT1G70850	7.00271	0.658092	13.3473	20.6223	4.36613	0.00179254	0.00520753	Up	0.279469	0.291231	0.0837684	0	0.0174037	0.0160308	MLP34	Araport:AT1G70850,TAIR:AT1G70850,GeneID:843422		MLP-like protein 34		GO:0006952	defense response
AT1G70940	2581.64	1053.73	4109.55	3.89757	1.96257	5.8e-43	1.64e-41	Up	33.252	34.9344	32.655	7.96077	7.15203	12.0924	PIN3	Araport:AT1G70940,TAIR:AT1G70940,GeneID:843432	A regulator of auxin efflux and involved in differential growth. PIN3 is expressed in gravity-sensing tissues, with PIN3 protein accumulating predominantly at the lateral cell surface. PIN3 localizes to the plasma membrane and to vesicles. In roots, PIN3 is expressed without pronounced polarity in tiers two and three of the columella cells, at the basal side of vascular cells, and to the lateral …	Auxin efflux carrier family protein		GO:0005783,GO:0005886,GO:0009416,GO:0009606,GO:0009630,GO:0009734,GO:0009926,GO:0009958,GO:0009986,GO:0010252,GO:0010315,GO:0010329,GO:0012506,GO:0016021,GO:0016328,GO:0048364,GO:0048766,GO:0048767	endoplasmic reticulum|plasma membrane|response to light stimulus|tropism|gravitropism|auxin-activated signaling pathway|auxin polar transport|positive gravitropism|cell surface|auxin homeostasis|auxin efflux|auxin efflux transmembrane transporter activity|vesicle membrane|integral component of membrane|lateral plasma membrane|root development|root hair initiation|root hair elongation
AT1G71020	899.237	449.94	1348.53	2.99925	1.5846	1.21e-43	3.47e-42	Up	11.8254	11.9224	11.4013	3.93506	4.19155	4.13363	F23N20.1	Araport:AT1G71020,TAIR:AT1G71020,GeneID:843442		ARM repeat superfamily protein		GO:0004842,GO:0005634,GO:0005737,GO:0016567,GO:0031648,GO:0043621,GO:0051865,GO:2000022	ubiquitin-protein transferase activity|nucleus|cytoplasm|protein ubiquitination|protein destabilization|protein self-association|protein autoubiquitination|regulation of jasmonic acid mediated signaling pathway
AT1G71030	1806.62	888.774	2724.47	3.06704	1.61685	3.53e-35	8.15e-34	Up	42.7588	40.4492	48.6368	12.3418	16.3718	16.2037	MYBL2	Araport:AT1G71030,TAIR:AT1G71030,GeneID:843443	Encodes a putative myb family transcription factor. In contrast to most other myb-like proteins its myb domain consists of a single repeat. A proline-rich region potentially involved in transactivation is found in the C-terminal part of the protein. Its transcript accumulates mainly in leaves.	MYB-like 2	MYB_related	GO:0003700,GO:0005634,GO:0009611,GO:0009651,GO:0009737,GO:0009751,GO:0009800,GO:0009892,GO:0030154,GO:0043565,GO:0044212	DNA-binding transcription factor activity|nucleus|response to wounding|response to salt stress|response to abscisic acid|response to salicylic acid|cinnamic acid biosynthetic process|negative regulation of metabolic process|cell differentiation|sequence-specific DNA binding|transcription regulatory region DNA binding
AT1G71110	266.739	420.856	112.621	0.267775	-1.9009	5.15e-22	7.3e-21	Down	1.38877	1.0544	0.889634	4.51503	4.13768	4.38199	F23N20.10	Araport:AT1G71110,TAIR:AT1G71110,GeneID:843451		transmembrane protein
AT1G71330	73.11	48.093	98.127	2.0389	1.02779	0.00070682	0.00224024	Up	2.3914	2.2501	2.15318	1.14367	1.05692	1.2905	NAP5	Araport:AT1G71330,TAIR:AT1G71330,GeneID:843474	member of NAP subfamily	non-intrinsic ABC protein 5		GO:0005215,GO:0005524,GO:0016021,GO:0042626	transporter activity|ATP binding|integral component of membrane|ATPase activity, coupled to transmembrane movement of substances
AT1G71390	21.4209	40.8042	2.0376	0.0502296	-4.31532	8.47e-08	4.75e-07	Down	0.0351643	0.0183221	0	0.363753	0.409498	0.342904	RLP11	Araport:AT1G71390,TAIR:AT1G71390,GeneID:843480		receptor like protein 11		GO:0005886,GO:0010073,GO:0016021	plasma membrane|meristem maintenance|integral component of membrane
AT1G71960	925.828	601.886	1249.77	2.07541	1.0534	3.74e-17	4.2e-16	Up	12.0424	13.1424	12.0285	5.74508	5.70846	7.34191	ABCG25	Araport:AT1G71960,TAIR:AT1G71960,GeneID:843527	Encodes a plasma membrane localized ABC transporter involved in abscisic acid transport and responses.	ATP-binding casette family G25		GO:0005524,GO:0005886,GO:0009737,GO:0016021,GO:0042626,GO:0055085,GO:0080168	ATP binding|plasma membrane|response to abscisic acid|integral component of membrane|ATPase activity, coupled to transmembrane movement of substances|transmembrane transport|abscisic acid transport
AT1G71970	774.234	266.203	1282.27	4.82002	2.26904	1.89e-47	6e-46	Up	23.7263	25.0757	26.9249	6.71192	5.43038	4.28742	F17M19.12	Araport:AT1G71970,TAIR:AT1G71970,GeneID:843528		hypothetical protein
AT1G72060	428.96	64.4287	793.491	12.3123	3.62203	2.13e-15	2.15e-14	Up	27.6537	32.4318	13.1918	1.4949	1.96703	2.77818	F28P5.12	Araport:AT1G72060,TAIR:AT1G72060,GeneID:843537		serine-type endopeptidase inhibitor
AT1G72070	53.5991	27.0287	80.1695	2.96642	1.56872	3.45e-05	0.000136346	Up	1.72068	2.07254	1.54862	0.462322	0.63875	0.784481	F28P5.5	Araport:AT1G72070,TAIR:AT1G72070,GeneID:843538		Chaperone DnaJ-domain superfamily protein		GO:0005524,GO:0006457,GO:0009408,GO:0009507,GO:0009535,GO:0009941,GO:0031072,GO:0046872,GO:0051082	ATP binding|protein folding|response to heat|chloroplast|chloroplast thylakoid membrane|chloroplast envelope|heat shock protein binding|metal ion binding|unfolded protein binding
AT1G72150	49963	16226.1	83699.9	5.15856	2.36697	1.46e-181	3.75e-179	Up	795.43	791.719	806.056	150.226	166.009	168.854	PATL1	Araport:AT1G72150,TAIR:AT1G72150,GeneID:843546	novel cell-plate-associated protein that is related in sequence to proteins involved in membrane trafficking in other eukaryotes	PATELLIN 1		GO:0002020,GO:0005773,GO:0005794,GO:0005886,GO:0007049,GO:0008289,GO:0009506,GO:0009507,GO:0009860,GO:0016020,GO:0048046,GO:0051301	protease binding|vacuole|Golgi apparatus|plasma membrane|cell cycle|lipid binding|plasmodesma|chloroplast|pollen tube growth|membrane|apoplast|cell division
AT1G72210	174.401	280.631	68.1703	0.242996	-2.04099	1.17e-17	1.35e-16	Down	0.63391	0.746752	0.486863	2.48901	2.99562	2.53533	bHLH096	Araport:AT1G72210,TAIR:AT1G72210,GeneID:843553		basic helix-loop-helix (bHLH) DNA-binding superfamily protein	bHLH	GO:0003677,GO:0003700,GO:0005634,GO:0046983	DNA binding|DNA-binding transcription factor activity|nucleus|protein dimerization activity
AT1G72240	157.242	277.617	36.8667	0.132459	-2.91638	4.08e-21	5.56e-20	Down	0.881552	1.93573	0.64172	9.21217	8.59939	9.48678	T9N14.5	Araport:AT1G72240,TAIR:AT1G72240,GeneID:843556		hypothetical protein
AT1G72260	6.78072	0.354812	13.2066	38.1616	5.25405	0.00128676	0.00386199	Up	0.423561	0.0245215	0.479622	0	0.0249116	0	THI2.1	Araport:AT1G72260,TAIR:AT1G72260,GeneID:843558	Encodes a thionin which is a cysteine rich protein having antimicrobial properties. Thi2.1 is expressed in response to a variety of pathogens and induced by ethylene and jasmonic acid. Belongs to the plant thionin (PR-13) family with the following members: At1g66100, At5g36910, At1g72260, At2g15010, At1g12663, At1g12660.	thionin 2.1		GO:0005576,GO:0006952,GO:0090729	extracellular region|defense response|toxin activity
AT1G72280	599.953	860.062	339.844	0.395169	-1.33946	2.52e-19	3.18e-18	Down	4.50239	4.75704	3.41586	11.545	11.1483	10.8543	ERO1	Araport:AT1G72280,TAIR:AT1G72280,GeneID:843560	endoplasmic reticulum oxidoreductin	endoplasmic reticulum oxidoreductins 1		GO:0003756,GO:0005783,GO:0005789,GO:0015035,GO:0016671,GO:0034975	protein disulfide isomerase activity|endoplasmic reticulum|endoplasmic reticulum membrane|protein disulfide oxidoreductase activity|oxidoreductase activity, acting on a sulfur group of donors, disulfide as acceptor|protein folding in endoplasmic reticulum	path:ath04141	Protein processing in endoplasmic reticulum
AT1G72300	931.493	522.757	1340.23	2.56252	1.35756	8.83e-34	1.95e-32	Up	7.79345	7.7886	7.62879	3.11237	2.88957	3.48842	PSY1R	Araport:AT1G72300,TAIR:AT1G72300,GeneID:843562	Encodes a leucine-rich repeat receptor kinase (LRR-RK) involved in the perception of PSY1. PSY1 is an 18-aa tyrosine-sulfated glycopeptide encoded by AT5G58650 that promotes cellular proliferation and expansion.	Leucine-rich receptor-like protein kinase family protein
AT1G72360	175.594	80.8267	270.361	3.33772	1.73886	7.01e-16	7.29e-15	Up	4.5523	4.83654	4.94742	1.69933	1.22366	1.57798	ERF73	Araport:AT1G72360,TAIR:AT1G72360,GeneID:843568	Encodes a member of the ERF (ethylene response factor) subfamily B-2 of ERF/AP2 transcription factor family. The protein contains one AP2 domain. There are 5 members in this subfamily including RAP2.2 AND RAP2.12.	Integrase-type DNA-binding superfamily protein	ERF	GO:0003677,GO:0003700,GO:0005634,GO:0009873	DNA binding|DNA-binding transcription factor activity|nucleus|ethylene-activated signaling pathway
AT1G72410	1546.44	990.933	2101.95	2.12121	1.08489	3.57e-27	6.21e-26	Up	11.0241	11.9046	10.9267	5.33725	5.41513	5.95709	T10D10.12	Araport:AT1G72410,TAIR:AT1G72410,GeneID:843573		COP1-interacting protein-like protein		GO:0005634,GO:0005886,GO:0009416,GO:0009718,GO:0015995,GO:0045893	nucleus|plasma membrane|response to light stimulus|anthocyanin-containing compound biosynthetic process|chlorophyll biosynthetic process|positive regulation of transcription, DNA-templated
AT1G72416	5325.7	1338.76	9312.64	6.95792	2.79866	1.4e-131	1.96e-129	Up	157.472	129.01	162.956	19.7828	23.2626	24.5043	AT1G72416	Araport:AT1G72416,TAIR:AT1G72416,GeneID:3767688		Chaperone DnaJ-domain superfamily protein		GO:0005788	endoplasmic reticulum lumen
AT1G72430	4603.01	1408.96	7797.05	5.53653	2.46898	9.97e-59	4.05e-57	Up	154.514	130.634	151.725	19.7845	33.193	29.2555	SAUR78	Araport:AT1G72430,TAIR:AT1G72430,GeneID:843575		SAUR-like auxin-responsive protein family		GO:0005634,GO:0005737,GO:0007275,GO:0009733,GO:0009873,GO:0019897,GO:0030307	nucleus|cytoplasm|multicellular organism development|response to auxin|ethylene-activated signaling pathway|extrinsic component of plasma membrane|positive regulation of cell growth
AT1G72450	9077.41	13057.6	5097.26	0.3904	-1.35698	8.67e-26	1.44e-24	Down	56.9861	45.1175	59.626	122.197	163.396	146.513	JAZ6	Araport:AT1G72450,TAIR:AT1G72450,GeneID:843577	JAZ6 transcript levels rise in response to a jasmonate stimulus and a GFP:JAZ6 fusion protein localizes to the nucleus. Application of jasmonate methyl ester to Arabidopsis roots reduces the levels of a JAZ6:GUS fusion protein, presumably by stimulating ubiquitin-proteasome-mediated degradation.	jasmonate-zim-domain protein 6		GO:0005634,GO:0006952,GO:0009611,GO:0009753,GO:0031347,GO:2000022	nucleus|defense response|response to wounding|response to jasmonic acid|regulation of defense response|regulation of jasmonic acid mediated signaling pathway	path:ath04075	Plant hormone signal transduction
AT1G72520	13287.9	25623.8	952.004	0.0371585	-4.75016	5.01e-246	2.3e-243	Down	8.50188	6.88485	5.71823	167.181	228.186	196.713	LOX4	Araport:AT1G72520,TAIR:AT1G72520,GeneID:843584		PLAT/LH2 domain-containing lipoxygenase family protein		GO:0009507,GO:0009555,GO:0009611,GO:0009617,GO:0009901,GO:0010193,GO:0016165,GO:0031408,GO:0034440,GO:0046872,GO:0048653,GO:0080086	chloroplast|pollen development|response to wounding|response to bacterium|anther dehiscence|response to ozone|linoleate 13S-lipoxygenase activity|oxylipin biosynthetic process|lipid oxidation|metal ion binding|anther development|stamen filament development	path:ath00591,path:ath00592	Linoleic acid metabolism|alpha-Linolenic acid metabolism
AT1G72540	31.9962	60.8562	3.1361	0.0509121	-4.29585	4.36e-10	3.03e-09	Down	0	0.117278	0.0327696	0.807796	1.03825	1.20719	F28P22.27	Araport:AT1G72540,TAIR:AT1G72540,GeneID:843586		Protein kinase superfamily protein
AT1G72610	83956	41793.3	126119	3.01774	1.59347	5.8e-73	3.28e-71	Up	2940.04	3179.9	3024.35	1004.74	1120.9	1039.73	GER1	Araport:AT1G72610,TAIR:AT1G72610,GeneID:843593	germin-like protein (GLP1)	germin-like protein 1		GO:0005618,GO:0030145,GO:0031012,GO:0045735,GO:0048046,GO:0055114	cell wall|manganese ion binding|extracellular matrix|nutrient reservoir activity|apoplast|oxidation-reduction process
AT1G72630	674.994	353.871	996.117	2.81225	1.49172	1.95e-27	3.43e-26	Up	21.1339	21.1928	25.3211	8.83984	7.20878	9.17177	ELF4-L2	Araport:AT1G72630,TAIR:AT1G72630,GeneID:843595		ELF4-like 2		GO:0005634,GO:0009648,GO:0009649,GO:0042753,GO:0042803,GO:0048511	nucleus|photoperiodism|entrainment of circadian clock|positive regulation of circadian rhythm|protein homodimerization activity|rhythmic process
AT1G72645	1563.18	961.172	2165.18	2.25324	1.172	1.04e-33	2.28e-32	Up	49.4049	51.0906	51.9131	23.0689	23.5401	24.1691	AT1G72645	Araport:AT1G72645,TAIR:AT1G72645,GeneID:2745853		transmembrane protein
AT1G72670	21.9986	10.8446	33.1526	3.05444	1.61091	0.0162676	0.0373644	Up	0.766544	0.199701	0.219713	0.106198	0.114119	0.186873	iqd8	Araport:AT1G72670,TAIR:AT1G72670,GeneID:843599		IQ-domain 8		GO:0005516,GO:0005634,GO:0005737,GO:0005874,GO:0008017	calmodulin binding|nucleus|cytoplasm|microtubule|microtubule binding
AT1G72700	1914.44	2739.69	1089.18	0.397482	-1.33104	1.15e-44	3.4e-43	Down	4.88437	5.09945	4.84285	13.7973	11.7916	13.5011	F28P22.11	Araport:AT1G72700,TAIR:AT1G72700,GeneID:843602		ATPase E1-E2 type family protein / haloacid dehalogenase-like hydrolase family protein		GO:0000139,GO:0000287,GO:0004012,GO:0005524,GO:0005802,GO:0005886,GO:0016021,GO:0045332,GO:0048194	Golgi membrane|magnesium ion binding|phospholipid-translocating ATPase activity|ATP binding|trans-Golgi network|plasma membrane|integral component of membrane|phospholipid translocation|Golgi vesicle budding
AT1G72720	10.4683	1.87891	19.0577	9.99842	3.3217	0.000604467	0.00193889	Up	0.714552	0.35742	0.553443	0.0281585	0.0302588	0.111487	F28P22.9	Araport:AT1G72720,TAIR:AT1G72720,GeneID:843604		hypothetical protein (DUF3511)
AT1G72790	1787.37	819.711	2755.03	3.36347	1.74995	1.79e-38	4.58e-37	Up	27.6126	32.0207	24.8194	7.64652	9.96908	8.59118	F28P22.2	Araport:AT1G72790,TAIR:AT1G72790,GeneID:843610		hydroxyproline-rich glycoprotein family protein
AT1G72820	618.996	369.086	868.906	2.35478	1.23559	1.98e-19	2.52e-18	Up	10.4974	11.6111	9.40892	4.94923	4.58438	4.47182	F3N23.2	Araport:AT1G72820,TAIR:AT1G72820,GeneID:843613		Mitochondrial substrate carrier family protein		GO:0000095,GO:0005743,GO:0009941,GO:0016021,GO:0031969	S-adenosyl-L-methionine transmembrane transporter activity|mitochondrial inner membrane|chloroplast envelope|integral component of membrane|chloroplast membrane
AT1G72920	668.218	1130.74	205.693	0.181956	-2.45834	1.62e-54	5.96e-53	Down	4.01774	4.26437	3.12779	19.7543	24.221	21.4759	F3N23.12	Araport:AT1G72920,TAIR:AT1G72920,GeneID:843623		Toll-Interleukin-Resistance (TIR) domain family protein		GO:0005737,GO:0006952,GO:0007165,GO:0009506	cytoplasm|defense response|signal transduction|plasmodesma
AT1G73010	58.3727	96.6634	20.082	0.208406	-2.26253	1.13e-07	6.25e-07	Down	0.380745	0.162315	0.49385	1.56861	2.19862	1.41762	PS2	Araport:AT1G73010,TAIR:AT1G73010,GeneID:843632	Encodes PPsPase1, a pyrophosphate-specific phosphatase catalyzing the specific cleavage of pyrophosphate (Km 38.8 uM) with an alkaline catalytic pH optimum. Expression is upregulated in the shoot of cax1/cax3 mutant.	inorganic pyrophosphatase 1		GO:0004427,GO:0016036,GO:0016462,GO:0016791,GO:0046872,GO:0051262	inorganic diphosphatase activity|cellular response to phosphate starvation|pyrophosphatase activity|phosphatase activity|metal ion binding|protein tetramerization	path:ath00750	Vitamin B6 metabolism
AT1G73080	2983.56	4610.65	1356.47	0.294209	-1.76509	7.46e-61	3.21e-59	Down	7.40374	8.80609	7.70802	27.7546	30.0877	27.074	PEPR1	Araport:AT1G73080,TAIR:AT1G73080,GeneID:843639	Encodes a leucine-rich repeat receptor kinase. Functions as a receptor for AtPep1 to amplify innate immunity response to pathogen attacks.	PEP1 receptor 1
AT1G73325	30.418	46.1419	14.6942	0.318435	-1.65093	0.00289239	0.00802579	Down	0.236075	0.191342	0.721767	1.36962	1.11077	1.30451	AT1G73325	Araport:AT1G73325,TAIR:AT1G73325,GeneID:843667		Kunitz family trypsin and protease inhibitor protein		GO:0004867,GO:0030246	serine-type endopeptidase inhibitor activity|carbohydrate binding
AT1G73330	289.167	128.111	450.224	3.51144	1.81206	0.00588689	0.0151672	Up	10.9922	6.71563	9.68517	3.5361	0.755652	3.99726	DR4	Araport:AT1G73330,TAIR:AT1G73330,GeneID:843668	encodes a plant-specific protease inhibitor-like protein whose transcript level in root disappears in response to progressive drought stress. The decrease in transcript level is independent from abscisic acid level.	drought-repressed 4		GO:0002237,GO:0002238,GO:0004866,GO:0005739,GO:0009611,GO:0009624,GO:0009625,GO:0009651,GO:0009751,GO:0012501,GO:0042542,GO:0042742	response to molecule of bacterial origin|response to molecule of fungal origin|endopeptidase inhibitor activity|mitochondrion|response to wounding|response to nematode|response to insect|response to salt stress|response to salicylic acid|programmed cell death|response to hydrogen peroxide|defense response to bacterium
AT1G73370	59.6898	80.9629	38.4166	0.473891	-1.07737	0.00494785	0.0130042	Down	0.251666	0.336227	0.151256	0.686592	0.45088	0.497115	SUS6	Araport:AT1G73370,TAIR:AT1G73370,GeneID:843672	Encodes a protein with sucrose synthase activity (SUS6).	sucrose synthase 6		GO:0005576,GO:0005618,GO:0005985,GO:0016157,GO:0080165	extracellular region|cell wall|sucrose metabolic process|sucrose synthase activity|callose deposition in phloem sieve plate	path:ath00500	Starch and sucrose metabolism
AT1G73390	1470.93	2001.82	940.039	0.469773	-1.08996	7.45e-20	9.63e-19	Down	8.42613	7.02289	7.62285	15.3541	18.2242	17.7414	T9L24.40	Araport:AT1G73390,TAIR:AT1G73390,GeneID:843674		Endosomal targeting BRO1-like domain-containing protein
AT1G73480	5032.16	7731.94	2332.38	0.301694	-1.72884	1.8e-56	6.99e-55	Down	22.5788	19.84	25.0467	79.8039	81.8957	71.8695	T9L24.33	Araport:AT1G73480,TAIR:AT1G73480,GeneID:843683		alpha/beta-Hydrolases superfamily protein		GO:0003846,GO:0004622,GO:0005783,GO:0005794,GO:0005886,GO:0006979,GO:0009506,GO:0009809,GO:0010043,GO:0016020,GO:0016787,GO:0042542,GO:0046686,GO:0090430	2-acylglycerol O-acyltransferase activity|lysophospholipase activity|endoplasmic reticulum|Golgi apparatus|plasma membrane|response to oxidative stress|plasmodesma|lignin biosynthetic process|response to zinc ion|membrane|hydrolase activity|response to hydrogen peroxide|response to cadmium ion|caffeoyl-CoA: alcohol caffeoyl transferase activity	path:ath00561	Glycerolipid metabolism
AT1G73805	2894.75	4191.49	1598	0.381241	-1.39122	1.02e-23	1.55e-22	Down	15.3935	18.0392	11.5686	37.3181	41.9912	44.1488	SARD1	Araport:AT1G73805,TAIR:AT1G73805,GeneID:843716	Encodes SAR Deficient 1 (SARD1), a key regulator for ICS1 (Isochorismate Synthase 1) induction and salicylic acid (SA) synthesis.	Calmodulin binding protein-like protein		GO:0002229,GO:0003700,GO:0005634,GO:0006355,GO:0009617,GO:0009626,GO:0010112,GO:0010224,GO:0042742,GO:0043565,GO:0071219,GO:0080142,GO:1900426	defense response to oomycetes|DNA-binding transcription factor activity|nucleus|regulation of transcription, DNA-templated|response to bacterium|plant-type hypersensitive response|regulation of systemic acquired resistance|response to UV-B|defense response to bacterium|sequence-specific DNA binding|cellular response to molecule of bacterial origin|regulation of salicylic acid biosynthetic process…
AT1G73810	860.243	1189.62	530.863	0.446358	-1.16373	6.87e-13	5.92e-12	Down	9.00983	8.92035	5.80565	17.2209	19.8862	18.4343	F25P22.23	Araport:AT1G73810,TAIR:AT1G73810,GeneID:843717		Core-2/I-branching beta-1,6-N-acetylglucosaminyltransferase family protein
AT1G73830	191.41	11.5798	371.239	32.058	5.00261	5.07e-47	1.59e-45	Up	6.25871	10.0161	6.2127	0.380367	0.215125	0.138708	BEE3	Araport:AT1G73830,TAIR:AT1G73830,GeneID:843719	Encodes the brassinosteroid signaling component BEE3 (BR-ENHANCED EXPRESSION 3). Positively modulates the shade avoidance syndrome in Arabidopsis seedlings.	BR enhanced expression 3	bHLH	GO:0003700,GO:0005634,GO:0006351,GO:0006355,GO:0043565,GO:0046983	DNA-binding transcription factor activity|nucleus|transcription, DNA-templated|regulation of transcription, DNA-templated|sequence-specific DNA binding|protein dimerization activity
AT1G74090	2663.85	3992.23	1335.47	0.334589	-1.57954	4.1e-42	1.14e-40	Down	23.9001	18.9572	22.4847	60.4565	70.3667	73.3734	SOT18	Araport:AT1G74090,TAIR:AT1G74090,GeneID:843749	encodes a desulfoglucosinolate sulfotransferase, involved in the final step of glucosinolate core structure biosynthesis. Has a broad-substrate specificity with preference with methionine-derived desulfoglucosinolates.	desulfo-glucosinolate sulfotransferase 18		GO:0005737,GO:0019761,GO:0047364,GO:0080066,GO:0080067,GO:0080068,GO:0080069,GO:0080070,GO:0080071	cytoplasm|glucosinolate biosynthetic process|desulfoglucosinolate sulfotransferase activity|3-methylthiopropyl-desulfoglucosinolate sulfotransferase activity|4-methylthiobutyl-desulfoglucosinolate sulfotransferase activity|5-methylthiopentyl-desulfoglucosinolate sulfotransferase activity|7-methylthioheptyl-desulfoglucosinolate sulfotransferase activity|8-methylthiooctyl-desulfoglucosinolate sulfo…	path:ath00966	Glucosinolate biosynthesis
AT1G74100	6123.83	10523	1724.68	0.163908	-2.60904	4.13e-151	7.53e-149	Down	29.0089	29.6357	27.5983	171.606	198.962	178.77	SOT16	Araport:AT1G74100,TAIR:AT1G74100,GeneID:843750	encodes a desulfoglucosinolate sulfotransferase, involved in the final step of glucosinolate core structure biosynthesis. Has a broad-substrate specificity with different desulfoglucosinolates, the best substrate is indole-3-methyl-dsGS, followed by benzyl-dsGS. Expression was induced by wounding, jasmonate and ethylene stimulates.	sulfotransferase 16		GO:0005737,GO:0019761,GO:0032260,GO:0047364	cytoplasm|glucosinolate biosynthetic process|response to jasmonic acid stimulus involved in jasmonic acid and ethylene-dependent systemic resistance|desulfoglucosinolate sulfotransferase activity	path:ath00380,path:ath00966	Tryptophan metabolism|Glucosinolate biosynthesis
AT1G74310	1224.57	522.649	1926.49	3.68435	1.88141	9.15e-41	2.48e-39	Up	11.1367	15.7662	11.7682	3.64837	3.32886	4.02487	HSP101	Araport:AT1G74310,TAIR:AT1G74310,GeneID:843771	Encodes ClpB1, which belongs to the Casein lytic proteinase/heat shock protein 100 (Clp/Hsp100) family. Involved in refolding of proteins which form aggregates under heat stress. Also known as AtHsp101. AtHsp101 is a cytosolic heat shock protein required for acclimation to high temperature.	heat shock protein 101		GO:0005524,GO:0005634,GO:0005829,GO:0009408,GO:0009570,GO:0009644,GO:0009941,GO:0019538,GO:0042542,GO:0043335,GO:0045727	ATP binding|nucleus|cytosol|response to heat|chloroplast stroma|response to high light intensity|chloroplast envelope|protein metabolic process|response to hydrogen peroxide|protein unfolding|positive regulation of translation
AT1G74360	891.043	1419.76	362.328	0.255224	-1.97017	8.67e-38	2.17e-36	Down	2.59829	2.38196	1.64249	8.68153	8.62194	9.87194	F1M20.4	Araport:AT1G74360,TAIR:AT1G74360,GeneID:843777		Leucine-rich repeat protein kinase family protein
AT1G74420	38.3405	71.5262	5.15482	0.071839	-3.79909	1.8e-09	1.19e-08	Down	0	0.035491	0.138835	0.883561	0.624964	1.04062	FUT3	Araport:AT1G74420,TAIR:AT1G74420,GeneID:843783	Predicted fucosyltransferase, based on similarity to FUT1, but not functionally redundantwith FUT1.	fucosyltransferase 3		GO:0005794,GO:0006486,GO:0008107,GO:0008417,GO:0009969,GO:0016021,GO:0032580,GO:0042546,GO:0071555	Golgi apparatus|protein glycosylation|galactoside 2-alpha-L-fucosyltransferase activity|fucosyltransferase activity|xyloglucan biosynthetic process|integral component of membrane|Golgi cisterna membrane|cell wall biogenesis|cell wall organization
AT1G74430	4430.96	8201.84	660.089	0.080484	-3.63515	2.57e-173	6.2e-171	Down	9.63142	10.1193	11.43	111.664	153.382	139.135	MYB95	Araport:AT1G74430,TAIR:AT1G74430,GeneID:843784	Encodes a putative transcription factor (MYB95).	myb domain protein 95	MYB	GO:0000902,GO:0003677,GO:0005634,GO:0010091,GO:0035017,GO:1901957	cell morphogenesis|DNA binding|nucleus|trichome branching|cuticle pattern formation|regulation of cutin biosynthetic process
AT1G74450	3025.06	4268.17	1781.96	0.417595	-1.25982	6.57e-28	1.18e-26	Down	22.7137	22.3383	22.8355	53.6394	64.3213	51.561	F1M20.13	Araport:AT1G74450,TAIR:AT1G74450,GeneID:843786		BPS1-like protein (DUF793)
AT1G74670	714.811	371.108	1058.51	2.85365	1.51281	0.00107776	0.00328584	Up	20.1992	31.4962	26.7965	8.23441	14.4316	5.77331	GASA6	Araport:AT1G74670,TAIR:AT1G74670,GeneID:843806		Gibberellin-regulated family protein		GO:0005576,GO:0009740,GO:0009744,GO:0009749,GO:0009750,GO:0080167	extracellular region|gibberellic acid mediated signaling pathway|response to sucrose|response to glucose|response to fructose|response to karrikin
AT1G74710	1216.43	2135.07	297.799	0.139421	-2.84248	5.19e-82	3.41e-80	Down	3.06326	3.7657	2.39164	21.4115	21.7224	26.145	EDS16	Araport:AT1G74710,TAIR:AT1G74710,GeneID:843810	Encodes a protein with isochorismate synthase activity. Mutants fail to accumulate salicylic acid. Its function may be redundant with that of ICS2 (AT1G18870).	ADC synthase superfamily protein		GO:0008909,GO:0009409,GO:0009507,GO:0009536,GO:0009617,GO:0009627,GO:0009697,GO:0010118,GO:0031348,GO:0042372,GO:0042742,GO:0050829,GO:0050832,GO:0060866	isochorismate synthase activity|response to cold|chloroplast|plastid|response to bacterium|systemic acquired resistance|salicylic acid biosynthetic process|stomatal movement|negative regulation of defense response|phylloquinone biosynthetic process|defense response to bacterium|defense response to Gram-negative bacterium|defense response to fungus|leaf abscission	path:ath00130	Ubiquinone and other terpenoid-quinone biosynthesis
AT1G74740	599.572	276.46	922.684	3.33626	1.73823	1.55e-38	3.96e-37	Up	10.0742	10.703	9.25463	3.06458	2.94651	3.41653	CPK30	Araport:AT1G74740,TAIR:AT1G74740,GeneID:843813	member of Calcium Dependent Protein Kinase	calcium-dependent protein kinase 30		GO:0004672,GO:0004683,GO:0005509,GO:0005524,GO:0005634,GO:0005737,GO:0005886,GO:0009738,GO:0009931,GO:0018105,GO:0035556	protein kinase activity|calmodulin-dependent protein kinase activity|calcium ion binding|ATP binding|nucleus|cytoplasm|plasma membrane|abscisic acid-activated signaling pathway|calcium-dependent protein serine/threonine kinase activity|peptidyl-serine phosphorylation|intracellular signal transduction	path:ath04626	Plant-pathogen interaction
AT1G74770	4.93908	9.53616	0.341993	0.0385094	-4.69865	0.00346865	0.0094325	Down	0	0	0.00512549	0.0495479	0.0372705	0.0637564	F25A4.26	Araport:AT1G74770,TAIR:AT1G74770,GeneID:843816		zinc ion binding protein		GO:0005634,GO:0008270,GO:0016021,GO:0016567,GO:0016874	nucleus|zinc ion binding|integral component of membrane|protein ubiquitination|ligase activity
AT1G74840	1801.13	1031.31	2570.94	2.4913	1.3169	2.06e-22	2.97e-21	Up	38.5688	35.4343	30.5005	14.7692	11.5136	17.7951	F25A4.19	Araport:AT1G74840,TAIR:AT1G74840,GeneID:843823		Homeodomain-like superfamily protein	MYB_related	GO:0003677,GO:0005634,GO:0005829	DNA binding|nucleus|cytosol
AT1G74910	4637.57	2591.48	6683.66	2.57957	1.36713	8.3e-58	3.28e-56	Up	66.3402	70.8017	70.1955	28.2459	28.3152	27.5017	F25A4.12	Araport:AT1G74910,TAIR:AT1G74910,GeneID:843830		ADP-glucose pyrophosphorylase family protein		GO:0004475,GO:0005525,GO:0005634,GO:0005829,GO:0006486,GO:0009298	mannose-1-phosphate guanylyltransferase activity|GTP binding|nucleus|cytosol|protein glycosylation|GDP-mannose biosynthetic process	path:ath00051,path:ath00520	Fructose and mannose metabolism|Amino sugar and nucleotide sugar metabolism
AT1G74929	31.1206	18.1702	44.0711	2.41939	1.27465	0.00654985	0.016678	Up	11.3185	9.71341	8.14229	4.59149	3.28931	4.76115	AT1G74929	Araport:AT1G74929,TAIR:AT1G74929,GeneID:6240887		hypothetical protein
AT1G74930	397.363	748.692	46.0353	0.0614632	-4.02413	3.63e-16	3.85e-15	Down	0.843266	1.30837	0.420146	14.1415	18.4697	10.8545	ORA47	Araport:AT1G74930,TAIR:AT1G74930,GeneID:843832	encodes a member of the DREB subfamily A-5 of ERF/AP2 transcription factor family. The protein contains one AP2 domain. There are 15 members in this subfamily including RAP2.1, RAP2.9 and RAP2.10.	Integrase-type DNA-binding superfamily protein	ERF	GO:0002213,GO:0003677,GO:0003700,GO:0005634,GO:0009611,GO:0009873,GO:0010087,GO:0051301	defense response to insect|DNA binding|DNA-binding transcription factor activity|nucleus|response to wounding|ethylene-activated signaling pathway|phloem or xylem histogenesis|cell division
AT1G74950	5470.81	8540.53	2401.08	0.281184	-1.83041	7.97e-69	4.09e-67	Down	42.5082	35.5304	39.8647	136.177	157.175	144.503	TIFY10B	Araport:AT1G74950,TAIR:AT1G74950,GeneID:843834		TIFY domain/Divergent CCT motif family protein		GO:0005634,GO:0006952,GO:0009611,GO:0009753,GO:0031347,GO:2000022	nucleus|defense response|response to wounding|response to jasmonic acid|regulation of defense response|regulation of jasmonic acid mediated signaling pathway	path:ath04075	Plant hormone signal transduction
AT1G75000	220.11	323.127	117.094	0.362376	-1.46444	6e-14	5.57e-13	Down	1.67317	1.89743	2.15653	5.34913	5.52236	5.66257	F25A4.4	Araport:AT1G75000,TAIR:AT1G75000,GeneID:843838		GNS1/SUR4 membrane protein family		GO:0009922,GO:0019367,GO:0030148,GO:0030176,GO:0030497,GO:0034625,GO:0034626,GO:0042761,GO:0071215	fatty acid elongase activity|fatty acid elongation, saturated fatty acid|sphingolipid biosynthetic process|integral component of endoplasmic reticulum membrane|fatty acid elongation|fatty acid elongation, monounsaturated fatty acid|fatty acid elongation, polyunsaturated fatty acid|very long-chain fatty acid biosynthetic process|cellular response to abscisic acid stimulus
AT1G75030	14.9819	25.1255	4.83832	0.191493	-2.38464	0.00182479	0.00529253	Down	0.0192984	0.140774	0.118004	0.589384	0.367749	0.564563	TLP-3	Araport:AT1G75030,TAIR:AT1G75030,GeneID:843841	encodes a PR5-like protein	thaumatin-like protein 3		GO:0005618,GO:0005773,GO:0009615,GO:0009627,GO:0010224,GO:0031540,GO:0046686,GO:0048046	cell wall|vacuole|response to virus|systemic acquired resistance|response to UV-B|regulation of anthocyanin biosynthetic process|response to cadmium ion|apoplast
AT1G75040	7002.36	12205.6	1799.16	0.147404	-2.76215	1.72e-06	8.27e-06	Down	41.5942	56.1845	13.1256	255.195	230.676	303.72	PR5	Araport:AT1G75040,TAIR:AT1G75040,GeneID:843842	Thaumatin-like protein involved in response to pathogens. mRNA level of the PR-5 gene (At1g75040)is significantly changed after cutting the inflorescence stem indicating the existence of a network of signal transducing pathways as other stress-regulated genes (At5g01410, At3g17800, At1g29930)do not response to the treatment.	pathogenesis-related protein 5		GO:0005618,GO:0005773,GO:0009615,GO:0009627,GO:0010224,GO:0031540,GO:0046686,GO:0048046	cell wall|vacuole|response to virus|systemic acquired resistance|response to UV-B|regulation of anthocyanin biosynthetic process|response to cadmium ion|apoplast
AT1G75090	73.9115	99.6473	48.1756	0.483353	-1.04885	0.00163494	0.00479266	Down	0.876489	0.755292	0.79018	2.37462	1.46324	1.41355	F9E10.6	Araport:AT1G75090,TAIR:AT1G75090,GeneID:843846		DNA glycosylase superfamily protein				path:ath03410	Base excision repair
AT1G75170	284.793	389.255	180.331	0.462686	-1.11189	6.63e-08	3.74e-07	Down	2.80794	2.92611	2.74909	7.00905	4.42558	7.86065	F22H5.20	Araport:AT1G75170,TAIR:AT1G75170,GeneID:843854		Sec14p-like phosphatidylinositol transfer family protein		GO:0005628,GO:0005886,GO:0120010,GO:0120014	prospore membrane|plasma membrane|intermembrane phospholipid transfer|intermembrane phospholipid transfer activity
AT1G75180	567.433	307.29	827.576	2.69596	1.4308	1.22e-17	1.42e-16	Up	7.83135	8.46238	10.1429	3.81015	3.6747	2.758	F22H5.9	Araport:AT1G75180,TAIR:AT1G75180,GeneID:843855		Erythronate-4-phosphate dehydrogenase family protein		GO:0004617,GO:0016021	phosphoglycerate dehydrogenase activity|integral component of membrane
AT1G75190	600.261	218.383	982.14	4.51092	2.17342	2.52e-26	4.27e-25	Up	17.9637	20.6718	19.111	3.26364	6.24174	3.80726	F22H5.8	Araport:AT1G75190,TAIR:AT1G75190,GeneID:843856		hypothetical protein
AT1G75230	1404.89	2338.89	470.89	0.201325	-2.3124	3.02e-89	2.14e-87	Down	3.0371	3.52558	3.3543	17.3611	17.8933	16.2132	F22H5.5	Araport:AT1G75230,TAIR:AT1G75230,GeneID:843860		DNA glycosylase superfamily protein		GO:0003684,GO:0003905,GO:0005634,GO:0006285,GO:0006307,GO:0008725,GO:0032131,GO:0032993,GO:0043916,GO:0045007,GO:0052820,GO:0052821,GO:0052822	damaged DNA binding|alkylbase DNA N-glycosylase activity|nucleus|base-excision repair, AP site formation|DNA dealkylation involved in DNA repair|DNA-3-methyladenine glycosylase activity|alkylated DNA binding|protein-DNA complex|DNA-7-methylguanine glycosylase activity|depurination|DNA-1,N6-ethenoadenine N-glycosylase activity|DNA-7-methyladenine glycosylase activity|DNA-3-methylguanine glycosylas…	path:ath03410	Base excision repair
AT1G75240	411.398	186.283	636.514	3.4159	1.77227	2.96e-31	5.96e-30	Up	8.15091	8.02437	8.9821	2.83339	2.37124	2.50728	HB33	Araport:AT1G75240,TAIR:AT1G75240,GeneID:843861	Encodes a zinc finger-homeodomain transcription factor ZHD5. Nuclear import and DNA binding of the ZHD5 transcription factor is modulated by a competitive peptide inhibitor MIF1 (AT1G74660).	homeobox protein 33	ZF-HD	GO:0003700,GO:0005634,GO:0009737,GO:0009738,GO:0042803,GO:0043565,GO:0045893,GO:0046872	DNA-binding transcription factor activity|nucleus|response to abscisic acid|abscisic acid-activated signaling pathway|protein homodimerization activity|sequence-specific DNA binding|positive regulation of transcription, DNA-templated|metal ion binding
AT1G75250	349.093	139.399	558.788	4.01482	2.00533	3.54e-29	6.65e-28	Up	9.37143	11.3777	9.56916	2.22298	2.88967	2.78592	RL6	Araport:AT1G75250,TAIR:AT1G75250,GeneID:843862		RAD-like 6	MYB_related	GO:0003677,GO:0003700,GO:0005634,GO:0006355	DNA binding|DNA-binding transcription factor activity|nucleus|regulation of transcription, DNA-templated
AT1G75300	142.949	236.197	49.7007	0.210193	-2.25021	4.31e-18	5.11e-17	Down	0.71548	0.973412	1.25578	5.24742	4.33431	5.09708	F22H5.16	Araport:AT1G75300,TAIR:AT1G75300,GeneID:843867	encodes a protein whose sequence is similar to an isoflavone reductase	NmrA-like negative transcriptional regulator family protein		GO:0005737,GO:0005886,GO:0006979,GO:0016491,GO:0046686	cytoplasm|plasma membrane|response to oxidative stress|oxidoreductase activity|response to cadmium ion
AT1G75310	3537.49	1540.09	5534.9	3.59397	1.84558	1.71e-67	8.43e-66	Up	25.3298	28.3245	24.8687	6.7542	7.51486	8.60615	AUL1	Araport:AT1G75310,TAIR:AT1G75310,GeneID:843868		auxin-like 1 protein		GO:0005737,GO:0006898,GO:0030276,GO:0031982,GO:0043231,GO:0072318,GO:0072583	cytoplasm|receptor-mediated endocytosis|clathrin binding|vesicle|intracellular membrane-bounded organelle|clathrin coat disassembly|clathrin-dependent endocytosis
AT1G75360	40.2661	56.8243	23.708	0.415627	-1.26664	0.00872422	0.0215195	Down	0.268647	0.456765	0.273783	0.975082	0.404156	1.15818	F1B16.16	Araport:AT1G75360,TAIR:AT1G75360,GeneID:843872		transmembrane protein
AT1G75450	67.7053	110.583	24.828	0.223917	-2.15896	1.45e-07	7.96e-07	Down	0.0747096	0.285464	0.253793	1.12039	0.834863	0.914708	CKX5	Araport:AT1G75450,TAIR:AT1G75450,GeneID:843881	This gene used to be called AtCKX6. It encodes a protein whose sequence is similar to cytokinin oxidase/dehydrogenase, which catalyzes the degradation of cytokinins.	cytokinin oxidase 5		GO:0005576,GO:0005615,GO:0009823,GO:0019139,GO:0071949	extracellular region|extracellular space|cytokinin catabolic process|cytokinin dehydrogenase activity|FAD binding	path:ath00908	Zeatin biosynthesis
AT1G75590	12.1621	4.3899	19.9343	4.50058	2.17011	0.0187098	0.0421846	Up	0.307504	0.591592	0.506234	0.279643	0.0250418	0.0230663	F10A5.20	Araport:AT1G75590,TAIR:AT1G75590,GeneID:843894		SAUR-like auxin-responsive protein family		GO:0009734,GO:0040008	auxin-activated signaling pathway|regulation of growth	path:ath04075	Plant hormone signal transduction
AT1G75640	7.60187	13.1429	2.06083	0.156459	-2.67614	0.0137262	0.0321728	Down	0.00593835	0.0123766	0.0181557	0.0292517	0.0817273	0.133188	F10A5.16	Araport:AT1G75640,TAIR:AT1G75640,GeneID:843899		Leucine-rich receptor-like protein kinase family protein
AT1G75730	493.941	306.451	681.431	2.22324	1.15266	2.08e-16	2.23e-15	Up	5.10621	5.13163	5.15751	2.20925	2.30988	2.73345	F10A5.7	Araport:AT1G75730,TAIR:AT1G75730,GeneID:843907		hypothetical protein
AT1G75750	7350.15	1119.37	13580.9	12.1412	3.60184	3.26e-219	1.25e-216	Up	386.378	450.874	368.935	32.2198	38.5962	32.9083	GASA1	Araport:AT1G75750,TAIR:AT1G75750,GeneID:843908	GA-responsive GAST1 protein homolog regulated by BR and GA antagonistically. Possibly involved in cell elongation based on expression data	GAST1 protein homolog 1		GO:0005576,GO:0005618,GO:0009505,GO:0009737,GO:0009739,GO:0009740,GO:0009741,GO:0009826	extracellular region|cell wall|plant-type cell wall|response to abscisic acid|response to gibberellin|gibberellic acid mediated signaling pathway|response to brassinosteroid|unidimensional cell growth
AT1G75760	942.652	533.251	1352.05	2.53645	1.34281	8.52e-31	1.69e-29	Up	18.0544	18.9868	18.6106	6.98962	7.75939	8.21061	F10A5.5	Araport:AT1G75760,TAIR:AT1G75760,GeneID:843909		ER lumen protein retaining receptor family protein		GO:0005789,GO:0006621,GO:0015031,GO:0016021,GO:0016192,GO:0046923	endoplasmic reticulum membrane|protein retention in ER lumen|protein transport|integral component of membrane|vesicle-mediated transport|ER retention sequence binding
AT1G75770	312.427	130.952	493.903	3.77202	1.91534	7.26e-24	1.11e-22	Up	10.4814	11.3527	11.944	3.90898	2.91367	2.54963	F10A5.4	Araport:AT1G75770,TAIR:AT1G75770,GeneID:843910		hypothetical protein
AT1G75800	11600.1	6175.24	17024.9	2.75673	1.46296	1.17e-54	4.37e-53	Up	222.892	236.741	214.421	80.7563	77.236	98.4221	T4O12.3	Araport:AT1G75800,TAIR:AT1G75800,GeneID:843913		Pathogenesis-related thaumatin superfamily protein		GO:0004672,GO:0004675,GO:0005524,GO:0009506,GO:0009620,GO:0016021	protein kinase activity|transmembrane receptor protein serine/threonine kinase activity|ATP binding|plasmodesma|response to fungus|integral component of membrane
AT1G75840	2543.78	1137.16	3950.4	3.47274	1.79607	4.2e-73	2.38e-71	Up	63.9653	69.5108	66.8696	22.5193	17.9512	19.9847	ARAC5	Araport:AT1G75840,TAIR:AT1G75840,GeneID:843917	Belongs to the plant-specific ROP group of Rho GTPases; localized to the plasma membrane of tips of root hairs; involved in polar growth control.	RAC-like GTP binding protein 5		GO:0000902,GO:0003924,GO:0005525,GO:0005634,GO:0005730,GO:0005737,GO:0005886,GO:0007015,GO:0007266,GO:0009524,GO:0009860,GO:0016477,GO:0019901,GO:0030036,GO:0030838,GO:0031532	cell morphogenesis|GTPase activity|GTP binding|nucleus|nucleolus|cytoplasm|plasma membrane|actin filament organization|Rho protein signal transduction|phragmoplast|pollen tube growth|cell migration|protein kinase binding|actin cytoskeleton organization|positive regulation of actin filament polymerization|actin cytoskeleton reorganization	path:ath04145,path:ath04933	Phagosome|AGE-RAGE signaling pathway in diabetic complications
AT1G76040	1638.57	2745.74	531.395	0.193511	-2.36951	9.37e-73	5.26e-71	Down	4.47726	5.43086	4.27996	21.9751	26.8468	27.8201	CPK29	Araport:AT1G76040,TAIR:AT1G76040,GeneID:843936	member of Calcium Dependent Protein Kinase	calcium-dependent protein kinase 29		GO:0004683,GO:0005509,GO:0005524,GO:0005634,GO:0005737,GO:0005886,GO:0009738,GO:0009931,GO:0018105,GO:0035556	calmodulin-dependent protein kinase activity|calcium ion binding|ATP binding|nucleus|cytoplasm|plasma membrane|abscisic acid-activated signaling pathway|calcium-dependent protein serine/threonine kinase activity|peptidyl-serine phosphorylation|intracellular signal transduction	path:ath04626	Plant-pathogen interaction
AT1G76090	1347.54	248.781	2446.3	9.83927	3.29855	6.03e-150	1.07e-147	Up	29.5458	37.051	34.386	3.76466	3.56176	3.4158	SMT3	Araport:AT1G76090,TAIR:AT1G76090,GeneID:843941	Encodes S-adenosyl-methionine-sterol-C-methyltransferase, an enzyme in the sterol biosynthetic pathway.	sterol methyltransferase 3		GO:0003838,GO:0005783,GO:0016021,GO:0016126,GO:0030797	sterol 24-C-methyltransferase activity|endoplasmic reticulum|integral component of membrane|sterol biosynthetic process|24-methylenesterol C-methyltransferase activity	path:ath00100	Steroid biosynthesis
AT1G76100	9784.9	5717.2	13852.6	2.42336	1.27701	2.48e-35	5.74e-34	Up	288.384	289.829	314.084	116.508	141.869	125.938	PETE1	Araport:AT1G76100,TAIR:AT1G76100,GeneID:843942	One of two Arabidopsis plastocyanin genes. Expressed at 1/10th level of PETE2. Does not respond to increased copper levels and is thought to be the isoform that participates in electron transport under copper-limiting conditions. Mutation of this gene does not have obvious effect on photosynthesis.	plastocyanin 1		GO:0005507,GO:0009055,GO:0009507,GO:0009535,GO:0009579,GO:0031977	copper ion binding|electron transfer activity|chloroplast|chloroplast thylakoid membrane|thylakoid|thylakoid lumen	path:ath00195	Photosynthesis
AT1G76110	1323.57	618.284	2028.86	3.28543	1.71608	3.03e-41	8.3e-40	Up	34.1946	30.7995	31.4692	10.1613	11.5437	8.93859	T23E18.4	Araport:AT1G76110,TAIR:AT1G76110,GeneID:843943		HMG (high mobility group) box protein with ARID/BRIGHT DNA-binding domain-containing protein		GO:0000741,GO:0003677,GO:0003700,GO:0005634,GO:0006355,GO:0010197	karyogamy|DNA binding|DNA-binding transcription factor activity|nucleus|regulation of transcription, DNA-templated|polar nucleus fusion
AT1G76210	10.0975	19.8607	0.334249	0.018565	-5.75127	7.04e-05	0.000265587	Down	0.0216208	0	0	0.468609	0.663786	0.189751	T23E18.14	Araport:AT1G76210,TAIR:AT1G76210,GeneID:843954		DUF241 domain protein, putative (DUF241)
AT1G76240	111.367	197.715	25.0183	0.126507	-2.98271	6.59e-18	7.74e-17	Down	0.368681	0.480247	0.526022	2.28827	4.33243	4.72766	T23E18.17	Araport:AT1G76240,TAIR:AT1G76240,GeneID:843957		DUF241 domain protein (DUF241)
AT1G76360	3121.04	4341.57	1900.52	0.437775	-1.19174	5.54e-41	1.51e-39	Down	23.4604	22.8809	21.2943	52.1035	52.9958	56.5882	F15M4.14	Araport:AT1G76360,TAIR:AT1G76360,GeneID:843968		Protein kinase superfamily protein
AT1G76380	467.823	731.739	203.908	0.278634	-1.84356	2.41e-32	5.02e-31	Down	1.76565	2.25474	2.18425	7.51093	8.12518	7.63349	F15M4.12	Araport:AT1G76380,TAIR:AT1G76380,GeneID:843970		DNA-binding bromodomain-containing protein		GO:0000124,GO:0000775,GO:0003713,GO:0004402,GO:0005634,GO:0005671,GO:0005829,GO:0006325,GO:0006338,GO:0010484,GO:0016573,GO:0032968,GO:0046695,GO:0070577	SAGA complex|chromosome, centromeric region|transcription coactivator activity|histone acetyltransferase activity|nucleus|Ada2/Gcn5/Ada3 transcription activator complex|cytosol|chromatin organization|chromatin remodeling|H3 histone acetyltransferase activity|histone acetylation|positive regulation of transcription elongation from RNA polymerase II promoter|SLIK (SAGA-like) complex|lysine-acetylat…
AT1G76390	1258.96	1829.57	688.358	0.376294	-1.41007	7.22e-32	1.48e-30	Down	5.02962	4.49807	5.72392	13.2257	13.8268	15.3804	PUB43	Araport:AT1G76390,TAIR:AT1G76390,GeneID:843971		ARM repeat superfamily protein		GO:0004842,GO:0005886	ubiquitin-protein transferase activity|plasma membrane
AT1G76410	57.2772	34.1996	80.3548	2.34489	1.22952	0.00127132	0.00381905	Up	1.19022	2.09898	2.19268	0.744136	0.702714	1.0044	ATL8	Araport:AT1G76410,TAIR:AT1G76410,GeneID:843974		RING/U-box superfamily protein		GO:0016021,GO:0016567,GO:0016740,GO:0046872	integral component of membrane|protein ubiquitination|transferase activity|metal ion binding
AT1G76470	5.2307	10.4614	0	0.0180199	-5.79427	0.00033325	0.00111797	Down	0	0	0	0.188331	0.118054	0.217482	F14G6.7	Araport:AT1G76470,TAIR:AT1G76470,GeneID:843980		NAD(P)-binding Rossmann-fold superfamily protein		GO:0006952,GO:0007623,GO:0009409,GO:0009699,GO:0016491,GO:0016616,GO:0016621,GO:0042754,GO:0050662	defense response|circadian rhythm|response to cold|phenylpropanoid biosynthetic process|oxidoreductase activity|oxidoreductase activity, acting on the CH-OH group of donors, NAD or NADP as acceptor|cinnamoyl-CoA reductase activity|negative regulation of circadian rhythm|coenzyme binding
AT1G76490	16196.3	9181.17	23211.5	2.52818	1.3381	1.14e-48	3.69e-47	Up	182.645	221.307	194.929	80.4338	81.1016	86.4159	HMG1	Araport:AT1G76490,TAIR:AT1G76490,GeneID:843982	Encodes a 3-hydroxy-3-methylglutaryl coenzyme A reductase, which is involved in melavonate biosynthesis and performs the first committed step in isoprenoid biosynthesis. Expression is activated in dark in leaf tissue but not controlled by light in the root (confine	hydroxy methylglutaryl CoA reductase 1		GO:0004420,GO:0005778,GO:0005783,GO:0005789,GO:0008299,GO:0015936,GO:0016021,GO:0016126,GO:0019287,GO:0042282,GO:0050661	hydroxymethylglutaryl-CoA reductase (NADPH) activity|peroxisomal membrane|endoplasmic reticulum|endoplasmic reticulum membrane|isoprenoid biosynthetic process|coenzyme A metabolic process|integral component of membrane|sterol biosynthetic process|isopentenyl diphosphate biosynthetic process, mevalonate pathway|hydroxymethylglutaryl-CoA reductase activity|NADP binding	path:ath00900	Terpenoid backbone biosynthesis
AT1G76520	5738.98	3734.27	7743.69	2.07356	1.05211	1.23e-38	3.16e-37	Up	69.2713	72.8515	74.5061	38.3738	34.0455	37.0042	F14G6.12	Araport:AT1G76520,TAIR:AT1G76520,GeneID:843985		Auxin efflux carrier family protein		GO:0005789,GO:0009733,GO:0009734,GO:0016021,GO:0055085	endoplasmic reticulum membrane|response to auxin|auxin-activated signaling pathway|integral component of membrane|transmembrane transport
AT1G76530	116.025	188.619	43.4313	0.230073	-2.11984	5.48e-15	5.38e-14	Down	0.539603	0.521168	0.643809	2.86549	2.07603	2.83631	F14G6.13	Araport:AT1G76530,TAIR:AT1G76530,GeneID:843986		Auxin efflux carrier family protein		GO:0005789,GO:0009733,GO:0009734,GO:0016021,GO:0055085	endoplasmic reticulum membrane|response to auxin|auxin-activated signaling pathway|integral component of membrane|transmembrane transport
AT1G76560	417.33	274.685	559.974	2.03928	1.02806	3.2e-10	2.26e-09	Up	19.0844	13.9825	15.9783	7.80987	8.2059	9.16189	CP12-3	Araport:AT1G76560,TAIR:AT1G76560,GeneID:843989		CP12 domain-containing protein 3		GO:0005507,GO:0009507,GO:0016151,GO:0019253,GO:0032991,GO:0034605,GO:0071454,GO:0080153	copper ion binding|chloroplast|nickel cation binding|reductive pentose-phosphate cycle|protein-containing complex|cellular response to heat|cellular response to anoxia|negative regulation of reductive pentose-phosphate cycle
AT1G76610	25.2905	38.8679	11.7131	0.300638	-1.7339	0.00265307	0.00742477	Down	0.0901873	0.32894	0.367647	0.910719	0.859301	0.967405	F14G6.21	Araport:AT1G76610,TAIR:AT1G76610,GeneID:843994		MIZU-KUSSEI-like protein (Protein of unknown function, DUF617)		GO:0005737,GO:0005783,GO:0005789,GO:0009658,GO:0010274,GO:0016020,GO:0032541	cytoplasm|endoplasmic reticulum|endoplasmic reticulum membrane|chloroplast organization|hydrotropism|membrane|cortical endoplasmic reticulum
AT1G76620	520.219	805.241	235.198	0.292101	-1.77546	3.1e-32	6.43e-31	Down	2.1852	2.45404	2.79995	8.21415	9.13004	9.28905	F14G6.22	Araport:AT1G76620,TAIR:AT1G76620,GeneID:843995		Serine/Threonine-kinase, putative (Protein of unknown function, DUF547)
AT1G76640	36.42	72.84	0	0.00259253	-8.59142	6.95e-12	5.59e-11	Down	0	0	0	2.292	2.893	3.20493	CALMODULIN LIKE 39	Araport:AT1G76640,TAIR:AT1G76640,GeneID:843997		Calcium-binding EF-hand family protein		GO:0005509,GO:0005737	calcium ion binding|cytoplasm	path:ath04626	Plant-pathogen interaction
AT1G76650	1904.71	3508.57	300.857	0.0857426	-3.54384	7.18e-23	1.05e-21	Down	6.97575	9.43113	4.04245	81.6375	94.6531	72.3143	CML38	Araport:AT1G76650,TAIR:AT1G76650,GeneID:843998		calmodulin-like 38		GO:0005509,GO:0005886,GO:0009611	calcium ion binding|plasma membrane|response to wounding	path:ath04626	Plant-pathogen interaction
AT1G76790	3516.23	5349.85	1682.61	0.314575	-1.66852	1.84e-46	5.69e-45	Down	29.3124	22.8149	30.7991	87.6271	95.4575	92.4225	IGMT5	Araport:AT1G76790,TAIR:AT1G76790,GeneID:844013		O-methyltransferase family protein		GO:0005829,GO:0008171,GO:0008757,GO:0009759,GO:0019438,GO:0046983	cytosol|O-methyltransferase activity|S-adenosylmethionine-dependent methyltransferase activity|indole glucosinolate biosynthetic process|aromatic compound biosynthetic process|protein dimerization activity
AT1G76890	1911.27	625.835	3196.71	5.11268	2.35408	1.34e-81	8.78e-80	Up	34.9864	33.6646	33.1949	5.73588	7.70181	7.3755	GT2	Araport:AT1G76890,TAIR:AT1G76890,GeneID:844024	encodes a plant trihelix DNA-binding protein	Duplicated homeodomain-like superfamily protein	Trihelix	GO:0003700,GO:0005634,GO:0043565	DNA-binding transcription factor activity|nucleus|sequence-specific DNA binding
AT1G76970	1905.12	2570.03	1240.2	0.482524	-1.05133	2.68e-13	2.38e-12	Down	11.3459	13.9195	8.54404	25.7152	23.6165	24.0001	F22K20.7	Araport:AT1G76970,TAIR:AT1G76970,GeneID:844033		Target of Myb protein 1		GO:0005737,GO:0006886,GO:0016020	cytoplasm|intracellular protein transport|membrane
AT1G76980	357.649	599.456	115.842	0.193269	-2.37132	1.92e-45	5.75e-44	Down	1.73407	1.52689	1.38364	8.78023	7.59934	8.80879	F22K20.8	Araport:AT1G76980,TAIR:AT1G76980,GeneID:844034		patatin-like phospholipase domain protein
AT1G76990	6937.6	3387.52	10487.7	3.09524	1.63005	1.94e-44	5.67e-43	Up	59.8441	57.456	67.9419	20.9128	16.8482	25.1297	ACR3	Araport:AT1G76990,TAIR:AT1G76990,GeneID:844035		ACT domain repeat 3		GO:0005829,GO:0016597	cytosol|amino acid binding
AT1G77020	163.296	87.176	239.415	2.73654	1.45235	4.06e-07	2.11e-06	Up	2.57239	4.27493	2.81474	1.28047	0.759655	1.67671	F22K20.12	Araport:AT1G77020,TAIR:AT1G77020,GeneID:844038		DNAJ heat shock N-terminal domain-containing protein
AT1G77210	1425.11	418.496	2431.73	5.81662	2.54018	2.38e-97	1.95e-95	Up	21.7163	22.8725	22.8518	4.45297	4.20421	3.46443	STP14	Araport:AT1G77210,TAIR:AT1G77210,GeneID:844057	AtSTP14 belongs to the family of sugar transport proteins (AtSTPs)in volved in monosaccharide transport. Heterologous expression in yeast revealed that AtSTP14 is the transporter specifc for galactose and does not transport other monosaccharides such as glucose or fructose.	sugar transporter 14		GO:0005351,GO:0005355,GO:0005886,GO:0005887,GO:0008645	carbohydrate:proton symporter activity|glucose transmembrane transporter activity|plasma membrane|integral component of plasma membrane|hexose transmembrane transport
AT1G77280	249.228	378.473	119.984	0.316659	-1.659	3.1e-16	3.3e-15	Down	0.835594	1.08449	0.79738	2.86627	2.56538	3.57043	T14N5.13	Araport:AT1G77280,TAIR:AT1G77280,GeneID:844064		kinase with adenine nucleotide alpha hydrolases-like domain-containing protein
AT1G77290	379.314	247.906	510.722	2.06037	1.0429	1.41e-11	1.11e-10	Up	6.47878	5.9445	7.23398	3.33124	3.19715	3.46093	T14N5.14	Araport:AT1G77290,TAIR:AT1G77290,GeneID:844065		Glutathione S-transferase family protein		GO:0004364,GO:0005886,GO:0009636	glutathione transferase activity|plasma membrane|response to toxic substance
AT1G77390	117.284	189.722	44.8459	0.236146	-2.08225	5.05e-13	4.39e-12	Down	0.655385	0.710287	0.387391	2.91844	2.10925	2.7609	CYCA1;2	Araport:AT1G77390,TAIR:AT1G77390,GeneID:844075	Encodes a core cell cycle gene involved in meiosis II during microsporogenesis. Recessive mutants exhibit delayed and asynchronous meiosis in pollen mother cell populations and uncoordinated nuclear division and cytokinesis resulting in dyad microspores.	CYCLIN A1;2		GO:0000079,GO:0000278,GO:0000307,GO:0005634,GO:0005737,GO:0006468,GO:0007088,GO:0007135,GO:0007140,GO:0008284,GO:0009556,GO:0016538,GO:0019901,GO:0045787,GO:0051301,GO:0051445	regulation of cyclin-dependent protein serine/threonine kinase activity|mitotic cell cycle|cyclin-dependent protein kinase holoenzyme complex|nucleus|cytoplasm|protein phosphorylation|regulation of mitotic nuclear division|meiosis II|male meiotic nuclear division|positive regulation of cell proliferation|microsporogenesis|cyclin-dependent protein serine/threonine kinase regulator activity|protein…
AT1G77400	144.91	214.766	75.0546	0.349457	-1.51681	7.44e-09	4.66e-08	Down	1.23992	1.53656	0.973338	4.40748	3.79608	3.00643	F2P24.15	Araport:AT1G77400,TAIR:AT1G77400,GeneID:844076		extensin-like protein
AT1G77500	862.903	1249.19	476.613	0.381539	-1.3901	3.84e-31	7.71e-30	Down	3.02574	3.40038	2.94251	8.76734	8.56988	8.3438	T5M16.9	Araport:AT1G77500,TAIR:AT1G77500,GeneID:844086		DUF630 family protein, putative (DUF630 and DUF632)		GO:0005634,GO:0010167,GO:0015706,GO:0071249,GO:0071705,GO:1901698	nucleus|response to nitrate|nitrate transport|cellular response to nitrate|nitrogen compound transport|response to nitrogen compound
AT1G77510	2899.49	4209.23	1589.74	0.377696	-1.4047	2.51e-47	7.93e-46	Down	20.5268	18.6294	17.6934	50.013	50.0878	57.5361	PDIL1-2	Araport:AT1G77510,TAIR:AT1G77510,GeneID:844087	Encodes a protein disulfide isomerase-like (PDIL) protein, a member of a multigene family within the thioredoxin (TRX) superfamily. Transcript levels for this gene are up-regulated in response to three different chemical inducers of ER stress (dithiothreitol, beta-mercaptoethanol, and tunicamycin). AtIRE1-2 does not appear to be required for this response, but the atbzip60 mutant has a diminished…	PDI-like 1-2		GO:0003756,GO:0005774,GO:0005783,GO:0005788,GO:0005794,GO:0005886,GO:0006457,GO:0009507,GO:0009570,GO:0009644,GO:0009651,GO:0010205,GO:0034976,GO:0045454,GO:0046686	protein disulfide isomerase activity|vacuolar membrane|endoplasmic reticulum|endoplasmic reticulum lumen|Golgi apparatus|plasma membrane|protein folding|chloroplast|chloroplast stroma|response to high light intensity|response to salt stress|photoinhibition|response to endoplasmic reticulum stress|cell redox homeostasis|response to cadmium ion	path:ath04141	Protein processing in endoplasmic reticulum
AT1G77520	19.2126	30.2855	8.13982	0.26864	-1.89625	0.00766077	0.0191505	Down	0.170524	0.0444251	0.130338	0.545988	0.165483	0.651285	T5M16.11	Araport:AT1G77520,TAIR:AT1G77520,GeneID:844088		O-methyltransferase family protein		GO:0005829,GO:0008168,GO:0008171,GO:0008757,GO:0019438,GO:0042343,GO:0046983	cytosol|methyltransferase activity|O-methyltransferase activity|S-adenosylmethionine-dependent methyltransferase activity|aromatic compound biosynthetic process|indole glucosinolate metabolic process|protein dimerization activity
AT1G77630	687.028	244.906	1129.15	4.61003	2.20477	3.28e-68	1.65e-66	Up	13.649	14.1461	13.8343	3.00845	3.02343	3.42389	LYM3	Araport:AT1G77630,TAIR:AT1G77630,GeneID:844098	Encodes a lysin-motif protein mediating bacterial peptidoglycan sensing and immunity to bacterial infection. Induction of chitin-responsive genes by chitin treatment is not blocked in the mutant.	Peptidoglycan-binding LysM domain-containing protein		GO:0005886,GO:0006952,GO:0006955,GO:0031225,GO:0042834,GO:0046658	plasma membrane|defense response|immune response|anchored component of membrane|peptidoglycan binding|anchored component of plasma membrane
AT1G77640	377.571	74.2415	680.901	9.20209	3.20196	6.41e-60	2.71e-58	Up	14.5124	14.0774	10.6007	1.52099	1.65487	1.27968	T5M16.23	Araport:AT1G77640,TAIR:AT1G77640,GeneID:844099	encodes a member of the DREB subfamily A-5 of ERF/AP2 transcription factor family. The protein contains one AP2 domain. There are 15 members in this subfamily including RAP2.1, RAP2.9 and RAP2.10.	Integrase-type DNA-binding superfamily protein	ERF	GO:0003677,GO:0003700,GO:0005634,GO:0009873	DNA binding|DNA-binding transcription factor activity|nucleus|ethylene-activated signaling pathway
AT1G77810	920.597	1407.52	433.677	0.308066	-1.69869	3.44e-42	9.61e-41	Down	6.32675	6.19986	6.24068	19.6139	19.5407	24.7064	T32E8.14	Araport:AT1G77810,TAIR:AT1G77810,GeneID:844443		Galactosyltransferase family protein		GO:0000139,GO:0005783,GO:0005794,GO:0006486,GO:0016021,GO:0048531	Golgi membrane|endoplasmic reticulum|Golgi apparatus|protein glycosylation|integral component of membrane|beta-1,3-galactosyltransferase activity
AT1G77870	12.2233	20.6669	3.77967	0.182619	-2.45309	0.0024524	0.00691479	Down	0.0376343	0.0784363	0.0958846	0.296612	0.438262	0.477086	MUB5	Araport:AT1G77870,TAIR:AT1G77870,GeneID:844123		membrane-anchored ubiquitin-fold protein 5 precursor		GO:0005886	plasma membrane
AT1G77990	582.366	379.687	785.044	2.06511	1.04622	8.24e-10	5.62e-09	Up	7.18374	6.76878	8.74381	3.69623	2.96611	4.88757	AST56	Araport:AT1G77990,TAIR:AT1G77990,GeneID:844134	cDNA encoding a sulfate transporter.	STAS domain / Sulfate transporter family		GO:0008271,GO:0015116,GO:0015293,GO:0015301,GO:0016021,GO:1902358	secondary active sulfate transmembrane transporter activity|sulfate transmembrane transporter activity|symporter activity|anion:anion antiporter activity|integral component of membrane|sulfate transmembrane transport
AT1G78070	9585.08	16658.6	2511.55	0.150776	-2.72952	5.96e-157	1.16e-154	Down	19.9511	16.6809	21.1821	125.917	128.322	147.318	F28K19.28	Araport:AT1G78070,TAIR:AT1G78070,GeneID:844142		Transducin/WD40 repeat-like superfamily protein		GO:0005829	cytosol
AT1G78110	363.586	149.385	577.786	3.86691	1.95118	9.66e-34	2.13e-32	Up	7.67401	7.72027	7.48247	1.85737	1.98185	2.35633	T11I11.5	Araport:AT1G78110,TAIR:AT1G78110,GeneID:844147		nucleolar GTP-binding protein
AT1G78170	244.248	342.789	145.707	0.424859	-1.23495	8.87e-08	4.95e-07	Down	2.79215	2.75344	2.59727	4.94769	5.89205	9.28295	T11I11.11	Araport:AT1G78170,TAIR:AT1G78170,GeneID:844153		E3 ubiquitin-protein ligase
AT1G78230	588.159	858.031	318.287	0.371166	-1.42986	1.23e-15	1.26e-14	Down	2.8067	2.20795	3.69229	7.40974	8.99172	8.09455	T11I11.17	Araport:AT1G78230,TAIR:AT1G78230,GeneID:844159		Outer arm dynein light chain 1 protein
AT1G78260	55.8759	30.9127	80.8391	2.61462	1.3866	0.00122515	0.00369675	Up	0.347439	0.863378	0.935141	0.228193	0.292371	0.338805	F3F9.20	Araport:AT1G78260,TAIR:AT1G78260,GeneID:844161		RNA-binding (RRM/RBD/RNP motifs) family protein		GO:0003729,GO:0005634,GO:0009414,GO:0009651,GO:0009737,GO:0010029	mRNA binding|nucleus|response to water deprivation|response to salt stress|response to abscisic acid|regulation of seed germination
AT1G78270	1358.36	418.766	2297.96	5.4881	2.45631	3.64e-76	2.15e-74	Up	27.7657	24.9719	33.8323	5.05269	5.38944	6.07293	UGT85A4	Araport:AT1G78270,TAIR:AT1G78270,GeneID:844162		UDP-glucosyl transferase 85A4		GO:0008194,GO:0015020,GO:0043231	UDP-glycosyltransferase activity|glucuronosyltransferase activity|intracellular membrane-bounded organelle
AT1G78290	171.05	249.838	92.261	0.368991	-1.43834	3.05e-09	1.98e-08	Down	1.19971	1.04815	1.0868	2.81754	2.47604	4.2069	SNRK2-8	Araport:AT1G78290,TAIR:AT1G78290,GeneID:844164	encodes a member of SNF1-related protein kinase (SnRK2) family whose activity is activated by ionic (salt) and non-ionic (mannitol) osmotic stress and dehydration.	Protein kinase superfamily protein		GO:0004674,GO:0005524,GO:0005634,GO:0005737,GO:0006468,GO:0006970,GO:0035556,GO:0080167	protein serine/threonine kinase activity|ATP binding|nucleus|cytoplasm|protein phosphorylation|response to osmotic stress|intracellular signal transduction|response to karrikin	path:ath04016,path:ath04075	MAPK signaling pathway - plant|Plant hormone signal transduction
AT1G78410	166.166	266.525	65.8068	0.246673	-2.01933	1.09e-17	1.27e-16	Down	1.20932	1.5162	0.982104	5.02622	4.821	5.89634	F3F9.8	Araport:AT1G78410,TAIR:AT1G78410,GeneID:844177		VQ motif-containing protein		GO:0005634,GO:0006979	nucleus|response to oxidative stress
AT1G78440	33.3212	59.1954	7.44696	0.126212	-2.98608	4.4e-07	2.27e-06	Down	0.189937	0.0179937	0.175971	1.15675	0.694637	1.36387	ATGA2OX1	Araport:AT1G78440,TAIR:AT1G78440,GeneID:844180	Encodes a gibberellin 2-oxidase that acts on C19 gibberellins.	gibberellin 2-beta-dioxygenase		GO:0009686,GO:0045487,GO:0046872,GO:0051213,GO:0052634	gibberellin biosynthetic process|gibberellin catabolic process|metal ion binding|dioxygenase activity|C-19 gibberellin 2-beta-dioxygenase activity	path:ath00904	Diterpenoid biosynthesis
AT1G78460	4293.9	1861.5	6726.3	3.61273	1.85309	5.59e-84	3.75e-82	Up	143.648	135.787	153.03	39.8029	38.4581	47.1972	F3F9.3	Araport:AT1G78460,TAIR:AT1G78460,GeneID:844182		SOUL heme-binding family protein
AT1G78830	17615.3	1743.23	33487.4	19.222	4.26469	2.15e-302	1.98e-299	Up	376.034	394.669	384.992	19.6449	24.455	18.5759	F9K20.12	Araport:AT1G78830,TAIR:AT1G78830,GeneID:844220		Curculin-like (mannose-binding) lectin family protein		GO:0005618,GO:0005794,GO:0005886,GO:0009505,GO:0009506,GO:0009735,GO:0030246,GO:0048046	cell wall|Golgi apparatus|plasma membrane|plant-type cell wall|plasmodesma|response to cytokinin|carbohydrate binding|apoplast
AT1G78850	4624.82	1258.12	7991.53	6.35314	2.66747	1.88e-19	2.39e-18	Up	100.03	134.529	87.2552	15.7149	22.1633	14.8041	F9K20.10	Araport:AT1G78850,TAIR:AT1G78850,GeneID:844222	curculin-like (mannose-binding) lectin family protein, low similarity to ser/thr protein kinase from Zea mays (GI:2598067); contains Pfam lectin (probable mannose binding) domain PF01453 but not the protein kinase domain of the Z. mays protein	D-mannose binding lectin protein with Apple-like carbohydrate-binding domain-containing protein		GO:0005618,GO:0005774,GO:0005794,GO:0005829,GO:0009505,GO:0030246,GO:0048046	cell wall|vacuolar membrane|Golgi apparatus|cytosol|plant-type cell wall|carbohydrate binding|apoplast
AT1G78940	77.7429	109.321	46.1652	0.422687	-1.24234	6.7e-05	0.000253726	Down	0.431972	0.415525	0.29631	0.941165	1.01137	0.874876	YUP8H12R.45	Araport:AT1G78940,TAIR:AT1G78940,GeneID:844233		kinase with adenine nucleotide alpha hydrolases-like domain-containing protein
AT1G78990	143.701	200.531	86.8715	0.433299	-1.20656	6.14e-07	3.12e-06	Down	1.15198	1.12814	1.31545	2.36552	2.92399	3.39711	YUP8H12R.39	Araport:AT1G78990,TAIR:AT1G78990,GeneID:844239		HXXXD-type acyl-transferase family protein		GO:0005737,GO:0005829,GO:0009809,GO:0009963,GO:0010252,GO:0016020,GO:0047172,GO:0047205,GO:0071555	cytoplasm|cytosol|lignin biosynthetic process|positive regulation of flavonoid biosynthetic process|auxin homeostasis|membrane|shikimate O-hydroxycinnamoyltransferase activity|quinate O-hydroxycinnamoyltransferase activity|cell wall organization
AT1G79110	1142.08	1657.25	626.915	0.378119	-1.40309	1.24e-18	1.51e-17	Down	8.01167	9.58157	7.53468	20.7653	18.6426	30.4637	BRG2	Araport:AT1G79110,TAIR:AT1G79110,GeneID:844252	Encodes one of the BRGs (BOI-related gene) involved in resistance to Botrytis cinerea.	zinc ion binding protein		GO:0004842,GO:0006952,GO:0043067,GO:0043161,GO:0046872	ubiquitin-protein transferase activity|defense response|regulation of programmed cell death|proteasome-mediated ubiquitin-dependent protein catabolic process|metal ion binding
AT1G79160	212.207	324.647	99.7658	0.307028	-1.70356	2.11e-14	2.01e-13	Down	1.72489	2.2237	1.34106	5.64107	5.45942	6.95353	YUP8H12R.23	Araport:AT1G79160,TAIR:AT1G79160,GeneID:844257		filamentous hemagglutinin transporter
AT1G79270	893.239	1336.63	449.852	0.336587	-1.57095	7.78e-33	1.65e-31	Down	3.02393	2.4842	3.2548	8.82152	8.3179	10.1519	ECT8	Araport:AT1G79270,TAIR:AT1G79270,GeneID:844267		evolutionarily conserved C-terminal region 8		GO:0003723,GO:0005737	RNA binding|cytoplasm
AT1G79310	41.5574	75.9551	7.15974	0.0944361	-3.40452	4.01e-10	2.8e-09	Down	0.0675732	0.0281668	0.192822	0.892061	1.07306	1.2388	MC7	Araport:AT1G79310,TAIR:AT1G79310,GeneID:844269	Encodes a putative metacaspase. Arabidopsis contains three type I MCP genes (MCP1a-c) and six type II MCP genes (MCP2a#Aeif): AtMCP1a/At5g64240, AtMCP1b/At1g02170, AtMCP1c/At4g25110, AtMCP2a/At1g79310, AtMCP2b/At1g79330, AtMCP2c/At1g79320, AtMCP2d/At1g79340, AtMCP2e/At1g16420, AtMCP2f/At5g04200.	metacaspase 7		GO:0008234	cysteine-type peptidase activity
AT1G79410	223.04	351.822	94.2582	0.268026	-1.89956	2.46e-20	3.26e-19	Down	1.23091	1.00174	1.06329	5.01236	3.94659	3.92104	2023-10-05	Araport:AT1G79410,TAIR:AT1G79410,GeneID:844279		organic cation/carnitine transporter5		GO:0005524,GO:0006811,GO:0009705,GO:0016021,GO:0022857,GO:0042631,GO:0070417,GO:0071472	ATP binding|ion transport|plant-type vacuole membrane|integral component of membrane|transmembrane transporter activity|cellular response to water deprivation|cellular response to cold|cellular response to salt stress
AT1G79530	111.911	162.818	61.0038	0.374491	-1.417	3.7e-08	2.15e-07	Down	0.613405	0.786734	0.745351	2.06861	1.93568	1.99003	GAPCP-1	Araport:AT1G79530,TAIR:AT1G79530,GeneID:844291	Encodes one of the chloroplast/plastid localized GAPDH isoforms (GAPCp1/At1g79530 and GAPCp2/At1g16300). gapcp double mutants display a drastic phenotype of arrested root development, dwarfism and sterility. GAPCps are important for the synthesis of serine in roots.	glyceraldehyde-3-phosphate dehydrogenase of plastid 1		GO:0004365,GO:0005507,GO:0005829,GO:0005975,GO:0006006,GO:0006096,GO:0008270,GO:0009536,GO:0009555,GO:0009570,GO:0009735,GO:0016020,GO:0048658,GO:0050661,GO:0051287,GO:0080022,GO:0080144	glyceraldehyde-3-phosphate dehydrogenase (NAD+) (phosphorylating) activity|copper ion binding|cytosol|carbohydrate metabolic process|glucose metabolic process|glycolytic process|zinc ion binding|plastid|pollen development|chloroplast stroma|response to cytokinin|membrane|anther wall tapetum development|NADP binding|NAD binding|primary root development|amino acid homeostasis	path:ath00010,path:ath00710	Glycolysis / Gluconeogenesis|Carbon fixation in photosynthetic organisms
AT1G79660	1531.76	899.113	2164.4	2.40624	1.26678	9.13e-34	2.02e-32	Up	60.0348	60.4948	62.3376	29.5865	23.4251	26.633	F20B17.9	Araport:AT1G79660,TAIR:AT1G79660,GeneID:844305		ephrin-A3 protein
AT1G79670	1470.81	937.373	2004.24	2.13686	1.09549	2.37e-22	3.42e-21	Up	19.2559	19.2919	16.9734	9.38915	7.7392	10.1269	RFO1	Araport:AT1G79670,TAIR:AT1G79670,GeneID:844306	Encodes a receptor-like kinase that does not contain an extracellular leucine-rich repeat domain. A novel type of dominant disease-resistance protein that confers resistance to a broad spectrum of Fusarium races.	Wall-associated kinase family protein
AT1G79680	246.424	400.15	92.6982	0.231739	-2.10943	8.25e-29	1.53e-27	Down	0.793822	0.790869	0.82678	3.36027	3.72173	3.80241	WAKL10	Araport:AT1G79680,TAIR:AT1G79680,GeneID:844307	Encodes a twin-domain, kinase-GC signaling molecule that may function in biotic stress responses that is critically dependent on the second messenger cGMP.	WALL ASSOCIATED KINASE (WAK)-LIKE 10
AT1G79700	519.55	44.6077	994.491	22.2711	4.4771	9.34e-96	7.37e-94	Up	12.5952	18.3426	11.5934	0.621842	0.622664	0.755398	WRI4	Araport:AT1G79700,TAIR:AT1G79700,GeneID:844309		Integrase-type DNA-binding superfamily protein	AP2	GO:0003677,GO:0003700,GO:0005634,GO:0009873	DNA binding|DNA-binding transcription factor activity|nucleus|ethylene-activated signaling pathway
AT1G79720	671.002	270.336	1071.67	3.95525	1.98377	2.38e-38	6.05e-37	Up	13.5068	15.1979	14.3277	4.12598	2.80851	4.49105	F19K16.30	Araport:AT1G79720,TAIR:AT1G79720,GeneID:844311		Eukaryotic aspartyl protease family protein		GO:0004190,GO:0005886,GO:0006508,GO:0030163,GO:0031225	aspartic-type endopeptidase activity|plasma membrane|proteolysis|protein catabolic process|anchored component of membrane
AT1G79760	50.646	30.8008	70.4913	2.27997	1.18901	0.00386263	0.0103934	Up	0.714352	1.45575	1.16482	0.609929	0.35292	0.572758	DTA4	Araport:AT1G79760,TAIR:AT1G79760,GeneID:844315	Identified as target of the AGL15 binding motif CArG.	downstream target of AGL15-4
AT1G80110	577.563	914.379	240.748	0.263419	-1.92457	8.93e-39	2.3e-37	Down	3.8346	3.69376	4.03927	13.4285	16.5111	15.947	PP2-B11	Araport:AT1G80110,TAIR:AT1G80110,GeneID:844351		phloem protein 2-B11		GO:0005634,GO:0016567,GO:0030246	nucleus|protein ubiquitination|carbohydrate binding
AT1G80120	2377.94	3845.66	910.23	0.236732	-2.07868	5.34e-100	4.55e-98	Down	14.7214	13.9804	15.6017	67.0975	65.9166	62.6742	F18B13.20	Araport:AT1G80120,TAIR:AT1G80120,GeneID:844352		LURP-one-like protein (DUF567)
AT1G80180	4415.21	1882.62	6947.79	3.69027	1.88373	4.41e-95	3.45e-93	Up	137.75	140.345	138.071	36.4502	37.638	44.0313	F18B13.26	Araport:AT1G80180,TAIR:AT1G80180,GeneID:844358	Encodes a substrate of the MAPK kinases. Phenotypic analyses of Arabidopsis expressing phosphorylation site mutant forms of At1g80180.1 showed clustered stomata and higher stomatal index in cotyledons expressing the phosphomimetic form of At1g80180.1.	hypothetical protein		GO:0005886,GO:0010375	plasma membrane|stomatal complex patterning
AT1G80270	321.205	470.439	171.971	0.365859	-1.45064	3.19e-17	3.6e-16	Down	1.68005	1.5686	1.73197	4.34358	5.18161	4.69709	PPR596	Araport:AT1G80270,TAIR:AT1G80270,GeneID:844367		PENTATRICOPEPTIDE REPEAT 596
AT1G80420	1709.85	758.985	2660.72	3.50615	1.80989	3.32e-77	2.03e-75	Up	29.3071	28.9505	28.2236	8.19261	8.43447	9.19325	ATXRCC1	Araport:AT1G80420,TAIR:AT1G80420,GeneID:844382	Encodes a component of plant break excision repair and functions at several stages during active DNA demethylation in Arabidopsis.	BRCT domain-containing DNA repair protein		GO:0005634,GO:0006266,GO:0006303,GO:0010385,GO:0080111,GO:1901969,GO:1901972	nucleus|DNA ligation|double-strand break repair via nonhomologous end joining|double-stranded methylated DNA binding|DNA demethylation|positive regulation of polynucleotide 3'-phosphatase activity|positive regulation of DNA-5-methylcytosine glycosylase activity	path:ath03410	Base excision repair
[truncated: 2,362 more rows]
