# Supplementary material for: Overexpression of Umellularia californica FatB thioesterase affects plant growth and lipid metabolome leading to improved drought tolerance in Arabidopsis and tomato
Source: Front Plant Sci. 2025 Jan 10;15:1446210. doi: 10.3389/fpls.2024.1446210 (PMC11757637; doi:10.3389/fpls.2024.1446210)
Supplement: Supplementary Table 6 — Correlation analysis between differential metabolites and differential genes. [file Table6.xls]

## Sheet: correlation_melt
Supplemental Table S6. Correlation analysis between differential metabolites and differential genes.
RNA	Metabolite	Correlation	Pvalue	AdjPvalue
AT5G56230	PC(14:0/20:3(8Z,11Z,14Z))	0.999683	1.50357e-07	0.00469952
AT1G21910	PC(14:1(9Z)/22:2(13Z,16Z))	0.999676	1.57791e-07	0.00469952
AT5G24030	PC(14:1(9Z)/22:2(13Z,16Z))	0.999611	2.27396e-07	0.00469952
AT3G49620	PC(16:0/18:2(9Z,12Z))	0.999441	4.67965e-07	0.00595413
AT4G16000	PC(14:1(9Z)/22:2(13Z,16Z))	0.999434	4.80172e-07	0.00595413
AT1G55390	PC(18:1(11Z)/18:3(6Z,9Z,12Z))	0.999365	6.04684e-07	0.0062484
AT1G11362	PC(16:0/18:2(9Z,12Z))	0.999221	9.10554e-07	0.00634144
AT2G23690	PC(18:1(11Z)/18:3(6Z,9Z,12Z))	0.999206	9.46224e-07	0.00634144
AT3G06070	PC(16:0/18:2(9Z,12Z))	0.999042	1.37743e-06	0.00634144
AT5G36925	TG(16:0/16:1(9Z)/20:5(5Z,8Z,11Z,14Z,17Z))	0.999024	1.42824e-06	0.00634144
AT5G57010	TG(16:0/16:1(9Z)/20:5(5Z,8Z,11Z,14Z,17Z))	0.998984	1.54765e-06	0.00634144
AT1G76640	TG(16:0/16:1(9Z)/20:5(5Z,8Z,11Z,14Z,17Z))	0.998984	1.54874e-06	0.00634144
AT4G38560	TG(16:0/16:1(9Z)/20:5(5Z,8Z,11Z,14Z,17Z))	0.998983	1.5508e-06	0.00634144
AT1G19610	TG(20:4(5Z,8Z,11Z,14Z)/22:6(4Z,7Z,10Z,13Z,16Z,19Z)/22:6(4Z,7Z,10Z,13Z,16Z,19Z))	0.998978	1.56595e-06	0.00634144
AT1G78270	PC(14:1(9Z)/22:1(13Z))	0.998961	1.61847e-06	0.00634144
AT5G38310	18:3-Glc-Stigmasterol	-0.998955	1.6365e-06	0.00634144
AT5G18937	DG(16:1(9Z)/18:1(9Z)/0:0)	0.998912	1.77602e-06	0.00645808
AT1G29640	TG(18:1(9Z)/18:2(9Z,12Z)/18:3(9Z,12Z,15Z))	0.998867	1.92629e-06	0.00645808
AT1G65690	18:3-Glc-Sitosterol	-0.998834	2.04008e-06	0.00645808
AT1G32170	PC(18:1(11Z)/18:3(6Z,9Z,12Z))	0.998821	2.08325e-06	0.00645808
AT5G56230	PC(18:2(9Z,12Z)/18:4(6Z,9Z,12Z,15Z))	0.998722	2.44926e-06	0.00723114
AT3G15357	TG(18:2(9Z,12Z)/18:2(9Z,12Z)/18:3(9Z,12Z,15Z))	0.998687	2.58511e-06	0.00728532
AT5G13320	TG(16:0/16:1(9Z)/20:5(5Z,8Z,11Z,14Z,17Z))	0.998611	2.89451e-06	0.00780259
AT2G43820	PC(14:1(9Z)/22:2(13Z,16Z))	0.998575	3.04645e-06	0.00786209
AT2G26400	TG(16:0/16:1(9Z)/20:5(5Z,8Z,11Z,14Z,17Z))	0.998507	3.3419e-06	0.00786209
AT3G21305	TG(18:2(9Z,12Z)/18:3(9Z,12Z,15Z)/18:3(9Z,12Z,15Z))	0.998486	3.43674e-06	0.00786209
AT5G54380	PC(14:1(9Z)/22:2(13Z,16Z))	0.998469	3.51351e-06	0.00786209
AT4G18210	PC(14:1(9Z)/22:2(13Z,16Z))	0.998461	3.55062e-06	0.00786209
AT5G37710	PC(14:1(9Z)/22:2(13Z,16Z))	0.998392	3.87601e-06	0.00819228
AT5G24030	PC(18:1(11Z)/18:3(6Z,9Z,12Z))	0.998346	4.10013e-06	0.00819228
AT5G38700	TG(16:0/16:1(9Z)/20:5(5Z,8Z,11Z,14Z,17Z))	0.998306	4.30453e-06	0.00819228
AT5G67480	PC(14:1(9Z)/22:2(13Z,16Z))	0.998303	4.31542e-06	0.00819228
AT4G15280	TG(16:0/16:1(9Z)/20:5(5Z,8Z,11Z,14Z,17Z))	0.998269	4.49199e-06	0.00819228
AT1G32170	PC(14:1(9Z)/22:2(13Z,16Z))	0.99823	4.69451e-06	0.00819228
AT1G16515	DG(18:3(6Z,9Z,12Z)/16:1(9Z)/0:0)	0.998227	4.71513e-06	0.00819228
AT1G26210	18:2-Glc-Sitosterol	0.998216	4.77207e-06	0.00819228
AT2G41990	TG(20:4(5Z,8Z,11Z,14Z)/22:6(4Z,7Z,10Z,13Z,16Z,19Z)/22:6(4Z,7Z,10Z,13Z,16Z,19Z))	0.998194	4.88894e-06	0.00819228
AT5G48400	DG(18:0/18:3(9Z,12Z,15Z)/0:0)	0.998157	5.09219e-06	0.0083083
AT1G15520	18:3-Glc-Sitosterol	-0.998126	5.2619e-06	0.00833354
AT4G30280	TG(18:2(9Z,12Z)/18:3(9Z,12Z,15Z)/18:3(9Z,12Z,15Z))	0.998106	5.37648e-06	0.00833354
AT4G16563	PC(14:1(9Z)/22:2(13Z,16Z))	0.997984	6.09503e-06	0.00902648
AT5G38130	TG(16:0/16:1(9Z)/20:5(5Z,8Z,11Z,14Z,17Z))	0.99798	6.11471e-06	0.00902648
AT1G12610	TG(18:2(9Z,12Z)/18:2(9Z,12Z)/18:3(9Z,12Z,15Z))	0.997934	6.39546e-06	0.00922136
AT5G10280	TG(18:0/18:2(9Z,12Z)/18:3(9Z,12Z,15Z))	0.997896	6.63417e-06	0.00930901
AT3G15635	18:2-Glc-Sitosterol	0.99787	6.80248e-06	0.00930901
AT4G15680	PC(16:0/20:5(5Z,8Z,11Z,14Z,17Z))	0.997831	7.05174e-06	0.00930901
AT1G09155	DG(18:0/20:5(5Z,8Z,11Z,14Z,17Z)/0:0)	0.997717	7.81002e-06	0.00930901
AT1G70640	TG(16:0/16:1(9Z)/20:5(5Z,8Z,11Z,14Z,17Z))	0.997655	8.242e-06	0.00930901
AT1G03300	18:2-Glc-Sitosterol	0.997631	8.41149e-06	0.00930901
AT1G21910	PC(18:1(11Z)/18:3(6Z,9Z,12Z))	0.997617	8.51291e-06	0.00930901
AT3G56000	PC(18:1(11Z)/18:3(6Z,9Z,12Z))	0.99761	8.56375e-06	0.00930901
AT3G29000	TG(18:2(9Z,12Z)/18:3(9Z,12Z,15Z)/18:3(9Z,12Z,15Z))	0.997581	8.77021e-06	0.00930901
AT4G05100	TG(16:0/16:1(9Z)/20:5(5Z,8Z,11Z,14Z,17Z))	0.997545	9.02978e-06	0.00930901
AT4G14630	18:3-Glc-Stigmasterol	-0.997534	9.11421e-06	0.00930901
AT2G21510	TG(16:1(9Z)/18:3(9Z,12Z,15Z)/20:5(5Z,8Z,11Z,14Z,17Z))	0.997529	9.15328e-06	0.00930901
AT4G34790	PC(16:0/18:2(9Z,12Z))	0.997527	9.16414e-06	0.00930901
AT2G30010	PC(14:0/20:1(11Z))	0.997524	9.18968e-06	0.00930901
AT2G38210	TG(16:0/16:1(9Z)/20:5(5Z,8Z,11Z,14Z,17Z))	0.997434	9.87192e-06	0.00930901
AT4G01420	TG(16:0/18:2(9Z,12Z)/18:2(9Z,12Z))	0.997408	1.00727e-05	0.00930901
AT1G11190	PE(16:0/20:5(5Z,8Z,11Z,14Z,17Z))	0.9974	1.0134e-05	0.00930901
AT4G34970	16:0-Glc-Stigmasterol	0.997397	1.01511e-05	0.00930901
AT2G24610	PC(14:0/20:1(11Z))	-0.997384	1.0255e-05	0.00930901
AT2G45220	DG(18:0/18:3(9Z,12Z,15Z)/0:0)	0.997365	1.04065e-05	0.00930901
AT5G52020	TG(16:1(9Z)/18:3(9Z,12Z,15Z)/20:5(5Z,8Z,11Z,14Z,17Z))	0.997349	1.05352e-05	0.00930901
AT4G35100	PC(14:0/20:1(11Z))	0.997341	1.05926e-05	0.00930901
AT2G23690	PC(14:1(9Z)/22:2(13Z,16Z))	0.997341	1.05987e-05	0.00930901
AT3G45970	PC(14:1(9Z)/22:2(13Z,16Z))	0.997306	1.08764e-05	0.00930901
AT3G25250	TG(18:0/18:2(9Z,12Z)/18:3(9Z,12Z,15Z))	0.997299	1.09361e-05	0.00930901
AT5G22380	18:3-Glc-Sitosterol	-0.997257	1.12783e-05	0.00930901
AT3G23550	PC(16:0/20:3(8Z,11Z,14Z))	0.99725	1.13373e-05	0.00930901
AT2G18620	16:3-Glc-Sitosterol	-0.997223	1.15575e-05	0.00930901
AT5G11160	PC(14:1(9Z)/22:1(13Z))	0.997199	1.17577e-05	0.00930901
AT5G25140	18:2-Glc-Sitosterol	0.997179	1.19272e-05	0.00930901
AT1G10000	PC(14:1(9Z)/22:2(13Z,16Z))	0.997169	1.20124e-05	0.00930901
AT2G04495	18:3-Glc-Sitosterol	-0.997155	1.21321e-05	0.00930901
AT1G52890	PC(14:1(9Z)/22:2(13Z,16Z))	-0.997152	1.21588e-05	0.00930901
AT1G74930	TG(18:2(9Z,12Z)/18:3(9Z,12Z,15Z)/18:3(9Z,12Z,15Z))	0.997131	1.2331e-05	0.00930901
AT1G03457	TG(20:4(5Z,8Z,11Z,14Z)/22:6(4Z,7Z,10Z,13Z,16Z,19Z)/22:6(4Z,7Z,10Z,13Z,16Z,19Z))	0.997121	1.2424e-05	0.00930901
AT3G46650	PC(14:1(9Z)/22:2(13Z,16Z))	-0.997117	1.24577e-05	0.00930901
AT2G28120	PC(14:1(9Z)/22:2(13Z,16Z))	0.997115	1.24763e-05	0.00930901
AT1G76090	TG(20:4(5Z,8Z,11Z,14Z)/22:6(4Z,7Z,10Z,13Z,16Z,19Z)/22:6(4Z,7Z,10Z,13Z,16Z,19Z))	0.997112	1.25019e-05	0.00930901
AT2G42360	TG(16:0/16:1(9Z)/20:5(5Z,8Z,11Z,14Z,17Z))	0.997085	1.2732e-05	0.00930901
AT5G54148	DG(14:1(9Z)/20:3(8Z,11Z,14Z)/0:0)	0.997044	1.30911e-05	0.00930901
AT2G13810	TG(16:0/16:1(9Z)/20:5(5Z,8Z,11Z,14Z,17Z))	0.997018	1.33265e-05	0.00930901
AT1G57650	TG(16:0/16:1(9Z)/20:5(5Z,8Z,11Z,14Z,17Z))	0.997002	1.34689e-05	0.00930901
AT1G72430	PC(16:0/18:2(9Z,12Z))	0.996985	1.36257e-05	0.00930901
AT4G34790	PC(14:1(9Z)/22:2(13Z,16Z))	0.996983	1.36422e-05	0.00930901
AT1G66230	DG(14:1(9Z)/20:3(8Z,11Z,14Z)/0:0)	0.996971	1.37457e-05	0.00930901
AT1G18620	PC(14:0/20:1(11Z))	0.996941	1.40222e-05	0.00930901
AT3G30775	TG(20:4(5Z,8Z,11Z,14Z)/22:6(4Z,7Z,10Z,13Z,16Z,19Z)/22:6(4Z,7Z,10Z,13Z,16Z,19Z))	0.996937	1.40551e-05	0.00930901
AT1G56720	TG(20:4(5Z,8Z,11Z,14Z)/22:6(4Z,7Z,10Z,13Z,16Z,19Z)/22:6(4Z,7Z,10Z,13Z,16Z,19Z))	0.99693	1.41236e-05	0.00930901
AT4G13340	PC(14:1(9Z)/22:2(13Z,16Z))	0.996905	1.43537e-05	0.00930901
AT5G11160	PC(16:0/20:3(8Z,11Z,14Z))	0.99689	1.44946e-05	0.00930901
AT5G66110	18:2-Glc-Sitosterol	0.996882	1.45687e-05	0.00930901
AT4G03140	TG(16:0/18:2(9Z,12Z)/18:2(9Z,12Z))	-0.996842	1.49413e-05	0.00930901
AT2G32190	18:2-Glc-Stigmasterol	-0.996829	1.5071e-05	0.00930901
AT1G12610	TG(18:2(9Z,12Z)/18:3(9Z,12Z,15Z)/18:3(9Z,12Z,15Z))	0.996825	1.51015e-05	0.00930901
AT5G53290	18:2-Glc-Stigmasterol	-0.996783	1.55033e-05	0.00930901
AT5G56550	TG(20:4(5Z,8Z,11Z,14Z)/22:6(4Z,7Z,10Z,13Z,16Z,19Z)/22:6(4Z,7Z,10Z,13Z,16Z,19Z))	0.99678	1.55343e-05	0.00930901
AT1G10000	PC(18:1(11Z)/18:3(6Z,9Z,12Z))	0.996738	1.59397e-05	0.00930901
AT1G70290	PC(14:1(9Z)/22:2(13Z,16Z))	0.996707	1.6252e-05	0.00930901
AT1G44130	DG(14:1(9Z)/20:5(5Z,8Z,11Z,14Z,17Z)/0:0)	-0.996682	1.64974e-05	0.00930901
AT4G21940	18:3-Glc-Sitosterol	-0.996647	1.68471e-05	0.00930901
AT5G63130	PC(14:1(9Z)/22:2(13Z,16Z))	-0.996644	1.68719e-05	0.00930901
AT4G02330	18:2-Glc-Stigmasterol	-0.996637	1.69433e-05	0.00930901
AT4G16000	PC(18:1(11Z)/18:3(6Z,9Z,12Z))	0.996619	1.7128e-05	0.00930901
AT1G55390	PE(16:0/18:2(9Z,12Z))	0.996612	1.7197e-05	0.00930901
AT4G21940	TG(16:0/16:1(9Z)/20:5(5Z,8Z,11Z,14Z,17Z))	0.996574	1.75869e-05	0.00930901
AT5G11140	TG(18:1(9Z)/18:2(9Z,12Z)/18:3(9Z,12Z,15Z))	0.996566	1.76695e-05	0.00930901
AT1G78070	TG(16:0/16:1(9Z)/20:5(5Z,8Z,11Z,14Z,17Z))	0.99656	1.7729e-05	0.00930901
AT1G66760	TG(16:1(9Z)/18:3(9Z,12Z,15Z)/20:5(5Z,8Z,11Z,14Z,17Z))	0.996551	1.78207e-05	0.00930901
AT1G78270	PC(16:0/20:3(8Z,11Z,14Z))	0.996541	1.79279e-05	0.00930901
AT5G58650	PC(16:0/18:2(9Z,12Z))	0.99652	1.81488e-05	0.00930901
AT1G72416	PC(16:0/18:2(9Z,12Z))	0.996519	1.81499e-05	0.00930901
AT3G18710	TG(18:2(9Z,12Z)/18:3(9Z,12Z,15Z)/18:3(9Z,12Z,15Z))	0.996518	1.81655e-05	0.00930901
AT2G43140	PC(14:0/20:1(11Z))	0.996511	1.82412e-05	0.00930901
AT3G44860	TG(16:1(9Z)/18:3(9Z,12Z,15Z)/20:5(5Z,8Z,11Z,14Z,17Z))	0.996509	1.82557e-05	0.00930901
AT1G69490	PC(14:0/20:3(8Z,11Z,14Z))	0.996505	1.82978e-05	0.00930901
AT5G59340	PC(14:1(9Z)/22:1(13Z))	0.996494	1.84184e-05	0.00930901
AT5G59510	18:3-Glc-Sitosterol	-0.996466	1.87136e-05	0.00930901
AT3G05900	PC(14:0/20:1(11Z))	0.996446	1.89284e-05	0.00930901
AT2G43820	PC(18:1(11Z)/18:3(6Z,9Z,12Z))	0.996443	1.89606e-05	0.00930901
AT2G36080	TG(20:4(5Z,8Z,11Z,14Z)/22:6(4Z,7Z,10Z,13Z,16Z,19Z)/22:6(4Z,7Z,10Z,13Z,16Z,19Z))	0.99639	1.95291e-05	0.00930901
AT3G50760	TG(16:0/16:1(9Z)/20:5(5Z,8Z,11Z,14Z,17Z))	0.99638	1.96321e-05	0.00930901
AT3G11402	PC(14:0/20:3(8Z,11Z,14Z))	0.996379	1.96444e-05	0.00930901
AT4G05100	TG(18:1(9Z)/18:2(9Z,12Z)/18:3(9Z,12Z,15Z))	0.996371	1.97359e-05	0.00930901
AT3G59750	PC(14:1(9Z)/22:2(13Z,16Z))	-0.996366	1.97876e-05	0.00930901
AT2G44578	TG(16:1(9Z)/18:3(9Z,12Z,15Z)/20:5(5Z,8Z,11Z,14Z,17Z))	0.996364	1.98057e-05	0.00930901
AT1G02620	PC(14:0/20:1(11Z))	0.996348	1.9977e-05	0.00930901
AT5G25260	DG(14:1(9Z)/20:5(5Z,8Z,11Z,14Z,17Z)/0:0)	-0.996317	2.03267e-05	0.00930901
AT2G30360	TG(16:1(9Z)/18:3(9Z,12Z,15Z)/20:5(5Z,8Z,11Z,14Z,17Z))	0.996314	2.03526e-05	0.00930901
AT3G18710	TG(18:2(9Z,12Z)/18:2(9Z,12Z)/18:3(9Z,12Z,15Z))	0.996308	2.04256e-05	0.00930901
AT5G65390	TG(20:4(5Z,8Z,11Z,14Z)/22:6(4Z,7Z,10Z,13Z,16Z,19Z)/22:6(4Z,7Z,10Z,13Z,16Z,19Z))	0.996283	2.06981e-05	0.00930901
AT4G03210	PC(14:0/20:1(11Z))	0.996249	2.10808e-05	0.00930901
AT5G44130	PC(16:0/18:2(9Z,12Z))	0.996239	2.11963e-05	0.00930901
AT3G11402	PC(18:2(9Z,12Z)/18:4(6Z,9Z,12Z,15Z))	0.996233	2.12632e-05	0.00930901
AT3G57260	18:3-Glc-Sitosterol	-0.996223	2.13737e-05	0.00930901
AT4G27652	TG(18:0/18:2(9Z,12Z)/18:3(9Z,12Z,15Z))	0.996222	2.13832e-05	0.00930901
AT4G39670	PC(14:1(9Z)/22:2(13Z,16Z))	-0.996218	2.14247e-05	0.00930901
AT1G79310	TG(18:1(9Z)/18:2(9Z,12Z)/18:3(9Z,12Z,15Z))	0.9962	2.16358e-05	0.00930901
AT3G21520	DG(18:3(6Z,9Z,12Z)/16:1(9Z)/0:0)	0.996192	2.17229e-05	0.00930901
AT1G16515	PE(18:3(9Z,12Z,15Z)/18:1(9Z))	0.996169	2.19891e-05	0.00930901
AT2G42870	TG(20:4(5Z,8Z,11Z,14Z)/22:6(4Z,7Z,10Z,13Z,16Z,19Z)/22:6(4Z,7Z,10Z,13Z,16Z,19Z))	0.996139	2.23282e-05	0.00930901
AT2G22760	18:3-Glc-Sitosterol	-0.996122	2.25236e-05	0.00930901
AT5G16580	18:3-Glc-Sitosterol	0.996116	2.25997e-05	0.00930901
AT5G62520	TG(18:0/18:2(9Z,12Z)/18:3(9Z,12Z,15Z))	0.996077	2.30547e-05	0.00930901
AT2G39400	PC(14:1(9Z)/22:2(13Z,16Z))	0.996057	2.32934e-05	0.00930901
AT4G21940	DG(14:1(9Z)/20:5(5Z,8Z,11Z,14Z,17Z)/0:0)	-0.996039	2.35054e-05	0.00930901
AT4G38340	16:0-Glc-Stigmasterol	0.996013	2.38128e-05	0.00930901
AT1G55390	PC(14:1(9Z)/22:2(13Z,16Z))	0.996007	2.38804e-05	0.00930901
AT2G23130	PC(16:0/18:2(9Z,12Z))	0.996001	2.39525e-05	0.00930901
AT3G23730	DG(16:1(9Z)/18:1(9Z)/0:0)	0.995963	2.44143e-05	0.00930901
AT1G05310	DG(16:1(9Z)/18:1(9Z)/0:0)	0.99594	2.46911e-05	0.00930901
AT5G06980	PC(16:0/20:3(8Z,11Z,14Z))	0.99594	2.46917e-05	0.00930901
AT4G03110	PC(14:1(9Z)/22:2(13Z,16Z))	0.995932	2.47943e-05	0.00930901
AT1G32960	18:3-Glc-Stigmasterol	-0.995931	2.47997e-05	0.00930901
AT1G74710	TG(16:0/16:1(9Z)/20:5(5Z,8Z,11Z,14Z,17Z))	0.995926	2.48682e-05	0.00930901
AT3G51910	16:3-Glc-Sitosterol	0.995878	2.54552e-05	0.00930901
AT3G55110	TG(16:0/16:1(9Z)/20:5(5Z,8Z,11Z,14Z,17Z))	0.995855	2.57358e-05	0.00930901
AT5G62520	TG(16:1(9Z)/18:3(9Z,12Z,15Z)/20:5(5Z,8Z,11Z,14Z,17Z))	0.995832	2.60228e-05	0.00930901
AT5G56550	DG(16:1(9Z)/18:1(9Z)/0:0)	0.995808	2.63279e-05	0.00930901
AT5G22920	18:3-Glc-Sitosterol	0.995805	2.63618e-05	0.00930901
AT3G53600	TG(16:0/16:1(9Z)/20:5(5Z,8Z,11Z,14Z,17Z))	0.99579	2.65516e-05	0.00930901
AT3G29035	DG(18:4(6Z,9Z,12Z,15Z)/16:1(9Z)/0:0)	-0.995786	2.65943e-05	0.00930901
AT2G25297	TG(16:0/16:1(9Z)/20:5(5Z,8Z,11Z,14Z,17Z))	0.995771	2.67935e-05	0.00930901
AT1G09932	TG(16:0/16:1(9Z)/20:5(5Z,8Z,11Z,14Z,17Z))	0.995761	2.69095e-05	0.00930901
AT1G53340	18:3-Glc-Sitosterol	0.995755	2.6992e-05	0.00930901
AT5G58650	18:2-Glc-Sitosterol	0.995752	2.70252e-05	0.00930901
AT5G15350	PC(14:0/20:1(11Z))	0.995732	2.7287e-05	0.00930901
AT1G79310	TG(16:0/16:1(9Z)/20:5(5Z,8Z,11Z,14Z,17Z))	0.995725	2.73766e-05	0.00930901
AT1G68620	18:3-Glc-Stigmasterol	-0.995674	2.80299e-05	0.00930901
AT5G11140	TG(16:0/18:2(9Z,12Z)/18:2(9Z,12Z))	0.995646	2.839e-05	0.00930901
AT3G21305	TG(18:2(9Z,12Z)/18:2(9Z,12Z)/18:3(9Z,12Z,15Z))	0.995646	2.83975e-05	0.00930901
AT3G20660	18:2-Glc-Sitosterol	0.995637	2.85093e-05	0.00930901
AT5G06980	PC(14:1(9Z)/22:1(13Z))	0.99562	2.87323e-05	0.00930901
AT1G33960	18:3-Glc-Sitosterol	-0.995602	2.89645e-05	0.00930901
AT5G05440	PC(14:1(9Z)/22:2(13Z,16Z))	0.995583	2.92177e-05	0.00930901
AT1G09932	18:3-Glc-Sitosterol	-0.995567	2.94359e-05	0.00930901
AT3G23550	PC(14:1(9Z)/22:1(13Z))	0.995566	2.94404e-05	0.00930901
AT1G33240	PC(14:1(9Z)/22:2(13Z,16Z))	0.995564	2.9475e-05	0.00930901
AT4G15233	PC(14:1(9Z)/22:2(13Z,16Z))	0.995558	2.95473e-05	0.00930901
AT4G09300	PC(14:1(9Z)/22:2(13Z,16Z))	-0.995548	2.96921e-05	0.00930901
AT5G13700	18:2-Glc-Sitosterol	-0.995486	3.05158e-05	0.00930901
AT4G21930	18:3-Glc-Stigmasterol	-0.995479	3.06065e-05	0.00930901
AT2G29300	18:3-Glc-Sitosterol	0.995466	3.07933e-05	0.00930901
AT1G72240	PC(16:0/18:2(9Z,12Z))	-0.995457	3.09103e-05	0.00930901
AT3G05500	TG(16:1(9Z)/18:3(9Z,12Z,15Z)/20:5(5Z,8Z,11Z,14Z,17Z))	0.995434	3.1227e-05	0.00930901
AT5G22545	TG(16:0/16:1(9Z)/20:5(5Z,8Z,11Z,14Z,17Z))	0.995429	3.12979e-05	0.00930901
AT1G19210	TG(18:2(9Z,12Z)/18:2(9Z,12Z)/18:3(9Z,12Z,15Z))	0.995429	3.12982e-05	0.00930901
AT5G65280	PC(14:1(9Z)/22:2(13Z,16Z))	-0.995428	3.13018e-05	0.00930901
AT3G54400	PC(14:0/20:1(11Z))	0.995426	3.13313e-05	0.00930901
AT2G14290	PC(14:1(9Z)/22:2(13Z,16Z))	-0.995407	3.15948e-05	0.00930901
AT5G08350	DG(18:4(6Z,9Z,12Z,15Z)/16:1(9Z)/0:0)	-0.995402	3.16665e-05	0.00930901
AT3G50770	TG(16:0/16:1(9Z)/20:5(5Z,8Z,11Z,14Z,17Z))	0.995398	3.17143e-05	0.00930901
AT1G69490	PC(18:2(9Z,12Z)/18:4(6Z,9Z,12Z,15Z))	0.995389	3.18426e-05	0.00930901
AT1G14280	18:3-Glc-Sitosterol	0.995386	3.18876e-05	0.00930901
AT5G39670	18:3-Glc-Stigmasterol	-0.995383	3.19197e-05	0.00930901
AT4G03210	TG(20:4(5Z,8Z,11Z,14Z)/22:6(4Z,7Z,10Z,13Z,16Z,19Z)/22:6(4Z,7Z,10Z,13Z,16Z,19Z))	0.995364	3.21875e-05	0.00930901
AT2G45080	PE(18:3(9Z,12Z,15Z)/18:1(9Z))	0.99536	3.22479e-05	0.00930901
AT4G15680	PC(18:2(9Z,12Z)/18:4(6Z,9Z,12Z,15Z))	0.995356	3.22947e-05	0.00930901
AT5G14700	18:3-Glc-Sitosterol	-0.995344	3.24725e-05	0.00930901
AT5G05220	PC(14:1(9Z)/22:2(13Z,16Z))	-0.995344	3.24737e-05	0.00930901
AT3G61060	PC(14:1(9Z)/22:2(13Z,16Z))	0.995329	3.26767e-05	0.00930901
AT5G14700	TG(16:0/16:1(9Z)/20:5(5Z,8Z,11Z,14Z,17Z))	0.995314	3.28799e-05	0.00930901
AT3G29250	18:3-Glc-Stigmasterol	-0.995313	3.28946e-05	0.00930901
AT2G28120	PC(16:0/18:2(9Z,12Z))	0.995285	3.32881e-05	0.00930901
AT3G44990	TG(18:2(9Z,12Z)/18:2(9Z,12Z)/18:3(9Z,12Z,15Z))	0.995273	3.34575e-05	0.00930901
AT5G25240	18:2-Glc-Sitosterol	0.995266	3.35644e-05	0.00930901
AT4G11460	PC(16:0/20:5(5Z,8Z,11Z,14Z,17Z))	0.99523	3.40757e-05	0.00930901
AT1G70560	TG(16:0/16:1(9Z)/20:5(5Z,8Z,11Z,14Z,17Z))	0.995193	3.46066e-05	0.00930901
AT3G22160	TG(16:0/16:1(9Z)/20:5(5Z,8Z,11Z,14Z,17Z))	0.995187	3.4692e-05	0.00930901
AT3G15357	TG(18:2(9Z,12Z)/18:3(9Z,12Z,15Z)/18:3(9Z,12Z,15Z))	0.995121	3.56461e-05	0.00930901
AT2G25200	PC(14:1(9Z)/22:2(13Z,16Z))	0.995074	3.63313e-05	0.00930901
AT5G16410	DG(14:1(9Z)/20:3(8Z,11Z,14Z)/0:0)	0.995061	3.65315e-05	0.00930901
AT3G54920	PC(14:0/20:1(11Z))	0.995048	3.67178e-05	0.00930901
AT5G03270	TG(18:1(9Z)/18:2(9Z,12Z)/18:3(9Z,12Z,15Z))	0.995048	3.67201e-05	0.00930901
AT5G19190	PC(16:0/18:2(9Z,12Z))	0.995037	3.68916e-05	0.00930901
AT3G07340	18:2-Glc-Sitosterol	0.995005	3.73632e-05	0.00930901
AT5G01540	PC(14:1(9Z)/22:2(13Z,16Z))	-0.994994	3.75318e-05	0.00930901
AT5G62280	TG(20:4(5Z,8Z,11Z,14Z)/22:6(4Z,7Z,10Z,13Z,16Z,19Z)/22:6(4Z,7Z,10Z,13Z,16Z,19Z))	0.994993	3.75378e-05	0.00930901
AT5G22545	18:3-Glc-Sitosterol	-0.994982	3.77006e-05	0.00930901
AT3G49580	PC(14:1(9Z)/22:2(13Z,16Z))	0.994975	3.78079e-05	0.00930901
AT3G51910	DG(16:1(9Z)/18:1(9Z)/0:0)	0.99497	3.78807e-05	0.00930901
AT5G60680	PC(14:1(9Z)/22:2(13Z,16Z))	0.994964	3.79785e-05	0.00930901
AT3G06890	TG(18:2(9Z,12Z)/18:2(9Z,12Z)/18:3(9Z,12Z,15Z))	0.99496	3.80444e-05	0.00930901
AT5G67480	PC(18:1(11Z)/18:3(6Z,9Z,12Z))	0.994946	3.82481e-05	0.00930901
AT1G02380	PC(14:0/20:1(11Z))	0.994929	3.85133e-05	0.00930901
AT4G38560	18:3-Glc-Sitosterol	-0.994925	3.85658e-05	0.00930901
AT3G29000	TG(18:2(9Z,12Z)/18:2(9Z,12Z)/18:3(9Z,12Z,15Z))	0.994918	3.8674e-05	0.00930901
AT5G59340	DG(14:1(9Z)/20:3(8Z,11Z,14Z)/0:0)	0.994881	3.92375e-05	0.00930901
AT5G02490	PC(14:1(9Z)/22:2(13Z,16Z))	-0.994881	3.92414e-05	0.00930901
AT1G21245	TG(18:1(9Z)/18:2(9Z,12Z)/18:3(9Z,12Z,15Z))	0.994863	3.95086e-05	0.00930901
AT1G21240	PC(14:1(9Z)/22:2(13Z,16Z))	-0.994852	3.96793e-05	0.00930901
AT3G19680	PC(16:0/18:2(9Z,12Z))	0.994847	3.97565e-05	0.00930901
AT2G39870	PC(14:1(9Z)/22:1(13Z))	0.994845	3.97921e-05	0.00930901
AT1G57630	TG(16:0/16:1(9Z)/20:5(5Z,8Z,11Z,14Z,17Z))	0.994845	3.97986e-05	0.00930901
AT1G02610	PC(14:1(9Z)/22:2(13Z,16Z))	0.994844	3.98139e-05	0.00930901
AT1G09950	DG(18:1(9Z)/18:3(9Z,12Z,15Z)/0:0)	-0.994836	3.99371e-05	0.00930901
AT3G60130	PC(14:1(9Z)/22:2(13Z,16Z))	0.994833	3.99772e-05	0.00930901
AT5G61590	PC(14:1(9Z)/22:2(13Z,16Z))	0.994799	4.0498e-05	0.00930901
AT1G54010	18:3-Glc-Sitosterol	-0.994791	4.06265e-05	0.00930901
AT3G06080	PC(14:1(9Z)/22:2(13Z,16Z))	0.99479	4.06412e-05	0.00930901
AT1G72540	TG(16:0/16:1(9Z)/20:5(5Z,8Z,11Z,14Z,17Z))	0.994786	4.07022e-05	0.00930901
AT2G26400	18:3-Glc-Sitosterol	-0.994781	4.0786e-05	0.00930901
AT1G80440	PC(16:0/18:2(9Z,12Z))	0.994777	4.0847e-05	0.00930901
AT1G01620	PC(14:0/20:1(11Z))	0.994775	4.08771e-05	0.00930901
AT5G18670	PC(14:0/20:1(11Z))	0.994754	4.12113e-05	0.00930901
AT4G23680	Cer(d14:1(4E)/26:0(2OH))	0.994746	4.13354e-05	0.00930901
AT2G25200	PC(18:1(11Z)/18:3(6Z,9Z,12Z))	0.994736	4.1496e-05	0.00930901
AT4G02540	18:2-Glc-Sitosterol	0.994713	4.18599e-05	0.00930901
AT2G23130	PC(14:1(9Z)/22:2(13Z,16Z))	0.99471	4.1909e-05	0.00930901
AT4G19420	18:2-Glc-Sitosterol	0.994685	4.23032e-05	0.00930901
AT5G18470	18:3-Glc-Stigmasterol	-0.994657	4.27449e-05	0.00930901
AT4G18210	PC(18:1(11Z)/18:3(6Z,9Z,12Z))	0.99465	4.28605e-05	0.00930901
AT3G22600	18:3-Glc-Stigmasterol	-0.994642	4.2984e-05	0.00930901
AT1G23480	PC(16:0/20:3(8Z,11Z,14Z))	0.994637	4.30671e-05	0.00930901
AT1G66465	18:3-Glc-Sitosterol	-0.994637	4.30687e-05	0.00930901
AT4G23200	PC(14:1(9Z)/22:2(13Z,16Z))	-0.994634	4.31064e-05	0.00930901
AT1G19300	TG(16:0/16:1(9Z)/20:5(5Z,8Z,11Z,14Z,17Z))	0.994629	4.31941e-05	0.00930901
AT4G21850	PC(14:1(9Z)/22:2(13Z,16Z))	-0.994618	4.33763e-05	0.00930901
AT4G18210	PC(16:0/18:2(9Z,12Z))	0.994614	4.34363e-05	0.00930901
AT3G02140	PC(14:0/20:1(11Z))	0.994609	4.35093e-05	0.00930901
AT2G15890	PC(14:1(9Z)/22:2(13Z,16Z))	0.994589	4.38464e-05	0.00930901
AT4G03110	PC(18:1(11Z)/18:3(6Z,9Z,12Z))	0.994587	4.38788e-05	0.00930901
AT5G37710	PC(18:1(11Z)/18:3(6Z,9Z,12Z))	0.994577	4.40256e-05	0.00930901
AT4G19420	PC(16:0/18:2(9Z,12Z))	0.994572	4.41199e-05	0.00930901
AT1G48100	PC(14:1(9Z)/22:2(13Z,16Z))	-0.994569	4.41622e-05	0.00930901
AT3G62950	PC(14:0/20:1(11Z))	0.994564	4.42439e-05	0.00930901
AT1G25230	18:3-Glc-Sitosterol	0.994564	4.42507e-05	0.00930901
AT1G09950	TG(16:0/18:2(9Z,12Z)/18:3(9Z,12Z,15Z))	0.994552	4.44369e-05	0.00930901
AT1G65890	PC(14:1(9Z)/22:2(13Z,16Z))	-0.994535	4.47185e-05	0.00930901
AT1G70640	TG(18:1(9Z)/18:2(9Z,12Z)/18:3(9Z,12Z,15Z))	0.994506	4.51902e-05	0.00930901
AT5G19190	PC(14:1(9Z)/22:2(13Z,16Z))	0.994506	4.51931e-05	0.00930901
AT4G17460	PC(16:0/18:2(9Z,12Z))	0.994502	4.52621e-05	0.00930901
AT5G41070	PC(18:1(11Z)/18:3(6Z,9Z,12Z))	-0.994499	4.53154e-05	0.00930901
AT5G06760	DG(18:3(6Z,9Z,12Z)/16:1(9Z)/0:0)	0.994493	4.54013e-05	0.00930901
AT2G20835	PC(14:1(9Z)/22:1(13Z))	0.994493	4.541e-05	0.00930901
AT1G22330	PC(14:0/20:1(11Z))	0.994492	4.54156e-05	0.00930901
AT5G54380	PC(18:1(11Z)/18:3(6Z,9Z,12Z))	0.994487	4.55039e-05	0.00930901
AT3G21150	PC(14:1(9Z)/22:2(13Z,16Z))	-0.994486	4.5523e-05	0.00930901
AT2G30930	PC(14:1(9Z)/22:2(13Z,16Z))	0.994476	4.56794e-05	0.00930901
AT1G11960	18:3-Glc-Sitosterol	-0.994471	4.57633e-05	0.00930901
AT2G40475	TG(16:0/16:1(9Z)/20:5(5Z,8Z,11Z,14Z,17Z))	0.994445	4.61977e-05	0.00930901
AT5G54490	18:2-Glc-Sitosterol	-0.994439	4.63035e-05	0.00930901
AT2G43140	DG(16:1(9Z)/18:3(9Z,12Z,15Z)/0:0)	0.994436	4.63496e-05	0.00930901
AT1G18620	18:3-Glc-Sitosterol	0.994435	4.63682e-05	0.00930901
AT2G39870	PC(16:0/20:3(8Z,11Z,14Z))	0.994433	4.64001e-05	0.00930901
AT5G53030	TG(18:2(9Z,12Z)/18:2(9Z,12Z)/18:3(9Z,12Z,15Z))	0.994426	4.65115e-05	0.00930901
AT3G48450	TG(16:1(9Z)/18:3(9Z,12Z,15Z)/20:5(5Z,8Z,11Z,14Z,17Z))	0.994426	4.65152e-05	0.00930901
AT3G46700	DG(18:3(6Z,9Z,12Z)/16:1(9Z)/0:0)	0.994412	4.67515e-05	0.00930901
AT1G72430	PC(14:1(9Z)/22:2(13Z,16Z))	0.994409	4.6805e-05	0.00930901
AT5G60270	PC(14:1(9Z)/22:2(13Z,16Z))	0.994408	4.68133e-05	0.00930901
AT2G42360	DG(14:1(9Z)/20:5(5Z,8Z,11Z,14Z,17Z)/0:0)	-0.994408	4.68172e-05	0.00930901
AT3G13520	PC(14:0/20:1(11Z))	0.994395	4.70407e-05	0.00930901
AT2G45180	18:3-Glc-Sitosterol	0.994394	4.70482e-05	0.00930901
AT2G17230	PC(14:1(9Z)/22:2(13Z,16Z))	0.994376	4.73614e-05	0.00930901
AT1G01620	18:3-Glc-Sitosterol	0.99437	4.7451e-05	0.00930901
AT5G14120	18:3-Glc-Sitosterol	0.994354	4.77286e-05	0.00930901
AT2G32140	18:3-Glc-Sitosterol	-0.994338	4.8005e-05	0.00930901
AT4G16563	PC(18:1(11Z)/18:3(6Z,9Z,12Z))	0.99433	4.81339e-05	0.00930901
AT5G15430	DG(18:0/18:3(9Z,12Z,15Z)/0:0)	0.994327	4.81754e-05	0.00930901
AT3G60470	PC(14:1(9Z)/22:2(13Z,16Z))	-0.994323	4.82565e-05	0.00930901
AT5G51790	18:2-Glc-Sitosterol	0.994319	4.83153e-05	0.00930901
AT3G46650	PC(18:1(11Z)/18:3(6Z,9Z,12Z))	-0.994311	4.84587e-05	0.00930901
AT1G22330	TG(20:4(5Z,8Z,11Z,14Z)/22:6(4Z,7Z,10Z,13Z,16Z,19Z)/22:6(4Z,7Z,10Z,13Z,16Z,19Z))	0.994308	4.85097e-05	0.00930901
AT2G01850	PC(14:1(9Z)/22:2(13Z,16Z))	0.994307	4.85227e-05	0.00930901
AT3G25180	PC(14:1(9Z)/22:2(13Z,16Z))	-0.994303	4.85883e-05	0.00930901
AT1G15670	18:3-Glc-Sitosterol	0.994299	4.86577e-05	0.00930901
AT1G74930	TG(18:2(9Z,12Z)/18:2(9Z,12Z)/18:3(9Z,12Z,15Z))	0.994298	4.8683e-05	0.00930901
AT5G44130	PC(14:1(9Z)/22:2(13Z,16Z))	0.99429	4.88199e-05	0.00930901
AT1G52720	TG(16:1(9Z)/18:3(9Z,12Z,15Z)/20:5(5Z,8Z,11Z,14Z,17Z))	0.994288	4.88546e-05	0.00930901
AT3G57520	PC(14:1(9Z)/22:2(13Z,16Z))	0.994276	4.90506e-05	0.00930901
AT2G13810	18:3-Glc-Sitosterol	-0.994272	4.91223e-05	0.00930901
AT4G15248	PC(14:1(9Z)/22:2(13Z,16Z))	-0.994268	4.91894e-05	0.00930901
AT3G44990	TG(18:2(9Z,12Z)/18:3(9Z,12Z,15Z)/18:3(9Z,12Z,15Z))	0.994267	4.91999e-05	0.00930901
AT3G58120	TG(20:4(5Z,8Z,11Z,14Z)/22:6(4Z,7Z,10Z,13Z,16Z,19Z)/22:6(4Z,7Z,10Z,13Z,16Z,19Z))	0.994265	4.9238e-05	0.00930901
AT5G36925	DG(14:1(9Z)/20:5(5Z,8Z,11Z,14Z,17Z)/0:0)	-0.994263	4.92679e-05	0.00930901
AT5G43650	18:3-Glc-Sitosterol	-0.994261	4.9311e-05	0.00930901
AT1G72416	18:2-Glc-Sitosterol	0.99425	4.94916e-05	0.00930901
AT3G15635	16:0-Glc-Stigmasterol	0.994235	4.97557e-05	0.00930901
AT5G59730	TG(16:1(9Z)/18:3(9Z,12Z,15Z)/20:5(5Z,8Z,11Z,14Z,17Z))	0.994234	4.9773e-05	0.00930901
AT3G45970	PC(18:1(11Z)/18:3(6Z,9Z,12Z))	0.994232	4.98121e-05	0.00930901
AT2G39870	18:2-Glc-Sitosterol	0.994217	5.00596e-05	0.00930901
AT5G38700	18:3-Glc-Sitosterol	-0.994215	5.00964e-05	0.00930901
AT3G06890	TG(18:2(9Z,12Z)/18:3(9Z,12Z,15Z)/18:3(9Z,12Z,15Z))	0.994206	5.02647e-05	0.00930901
AT1G43160	TG(18:1(9Z)/18:2(9Z,12Z)/18:3(9Z,12Z,15Z))	0.994202	5.03211e-05	0.00930901
AT5G03120	PC(14:1(9Z)/22:2(13Z,16Z))	0.994169	5.09086e-05	0.00930901
AT5G52570	TG(16:0/16:1(9Z)/20:5(5Z,8Z,11Z,14Z,17Z))	0.994167	5.09365e-05	0.00930901
AT4G17460	18:2-Glc-Sitosterol	0.994136	5.14851e-05	0.00930901
AT2G20562	TG(18:1(9Z)/18:2(9Z,12Z)/18:3(9Z,12Z,15Z))	0.99411	5.19384e-05	0.00930901
AT4G34790	PC(18:1(11Z)/18:3(6Z,9Z,12Z))	0.994106	5.20037e-05	0.00930901
AT5G46330	PC(14:1(9Z)/22:2(13Z,16Z))	0.9941	5.21154e-05	0.00930901
AT2G36080	PC(14:0/20:1(11Z))	0.994093	5.22411e-05	0.00930901
AT3G10020	PC(14:1(9Z)/22:2(13Z,16Z))	0.994086	5.23544e-05	0.00930901
AT1G50040	18:3-Glc-Sitosterol	0.994078	5.25078e-05	0.00930901
AT4G16750	DG(18:3(6Z,9Z,12Z)/16:1(9Z)/0:0)	0.994066	5.27072e-05	0.00930901
AT5G01810	PC(14:1(9Z)/22:2(13Z,16Z))	0.994064	5.27462e-05	0.00930901
AT4G36950	PC(14:1(9Z)/22:2(13Z,16Z))	-0.994061	5.27992e-05	0.00930901
AT5G10150	18:3-Glc-Sitosterol	0.99405	5.29912e-05	0.00930901
AT5G25240	PC(16:0/20:3(8Z,11Z,14Z))	0.994044	5.31036e-05	0.00930901
AT3G44350	18:3-Glc-Sitosterol	-0.994043	5.31233e-05	0.00930901
AT1G64390	PC(14:1(9Z)/22:2(13Z,16Z))	-0.99403	5.33543e-05	0.00930901
AT4G16000	PC(16:0/18:2(9Z,12Z))	0.994011	5.36983e-05	0.00930901
AT5G25240	PC(14:1(9Z)/22:1(13Z))	0.994002	5.38633e-05	0.00930901
AT1G14280	PC(14:0/20:1(11Z))	0.993999	5.39048e-05	0.00930901
AT2G18690	PC(14:1(9Z)/22:2(13Z,16Z))	-0.993997	5.39466e-05	0.00930901
AT1G60190	TG(16:1(9Z)/18:3(9Z,12Z,15Z)/20:5(5Z,8Z,11Z,14Z,17Z))	0.993996	5.39553e-05	0.00930901
AT5G19100	TG(16:0/16:1(9Z)/20:5(5Z,8Z,11Z,14Z,17Z))	0.993992	5.40359e-05	0.00930901
AT2G20835	DG(14:1(9Z)/20:3(8Z,11Z,14Z)/0:0)	0.993967	5.44816e-05	0.00930901
AT1G22530	PC(14:1(9Z)/22:2(13Z,16Z))	0.993948	5.48299e-05	0.00930901
AT1G77210	18:3-Glc-Sitosterol	0.993946	5.48681e-05	0.00930901
AT1G70130	18:3-Glc-Sitosterol	-0.993936	5.50462e-05	0.00930901
AT1G15520	TG(16:0/16:1(9Z)/20:5(5Z,8Z,11Z,14Z,17Z))	0.993922	5.53088e-05	0.00930901
AT5G43650	TG(16:0/16:1(9Z)/20:5(5Z,8Z,11Z,14Z,17Z))	0.993919	5.53621e-05	0.00930901
AT3G50760	TG(18:1(9Z)/18:2(9Z,12Z)/18:3(9Z,12Z,15Z))	0.993918	5.53785e-05	0.00930901
AT3G57740	DG(16:1(9Z)/18:3(9Z,12Z,15Z)/0:0)	0.993903	5.56405e-05	0.00930901
AT3G02170	PC(14:1(9Z)/22:2(13Z,16Z))	0.993887	5.5943e-05	0.00930901
AT3G49340	TG(16:0/16:1(9Z)/20:5(5Z,8Z,11Z,14Z,17Z))	0.993886	5.59498e-05	0.00930901
AT3G50770	TG(18:1(9Z)/18:2(9Z,12Z)/18:3(9Z,12Z,15Z))	0.99388	5.60616e-05	0.00930901
AT1G19210	TG(18:2(9Z,12Z)/18:3(9Z,12Z,15Z)/18:3(9Z,12Z,15Z))	0.993875	5.61643e-05	0.00930901
AT5G26920	PC(14:1(9Z)/22:2(13Z,16Z))	-0.993873	5.61907e-05	0.00930901
AT4G10390	PC(14:1(9Z)/22:2(13Z,16Z))	-0.993857	5.64866e-05	0.00930901
AT2G38240	PC(14:1(9Z)/22:2(13Z,16Z))	-0.993853	5.65653e-05	0.00930901
AT3G49790	PC(14:1(9Z)/22:2(13Z,16Z))	0.993853	5.65672e-05	0.00930901
AT5G23870	18:2-Glc-Sitosterol	0.99382	5.71715e-05	0.00930901
AT5G44020	PC(14:0/20:1(11Z))	0.993809	5.73778e-05	0.00930901
AT5G16580	PC(14:0/20:1(11Z))	0.993802	5.75075e-05	0.00930901
AT3G09940	PC(14:1(9Z)/22:2(13Z,16Z))	-0.993798	5.75853e-05	0.00930901
AT3G44350	TG(16:0/16:1(9Z)/20:5(5Z,8Z,11Z,14Z,17Z))	0.993795	5.76332e-05	0.00930901
AT2G24210	18:3-Glc-Stigmasterol	-0.993791	5.77026e-05	0.00930901
AT1G44130	PC(14:0/20:1(11Z))	-0.99379	5.77289e-05	0.00930901
AT5G26920	18:3-Glc-Sitosterol	-0.993788	5.77611e-05	0.00930901
AT2G23690	PE(16:0/18:2(9Z,12Z))	0.993788	5.77712e-05	0.00930901
AT4G38340	18:2-Glc-Sitosterol	0.993781	5.78937e-05	0.00930901
AT5G44680	PC(14:1(9Z)/22:2(13Z,16Z))	0.993777	5.79739e-05	0.00930901
AT2G43820	PC(16:0/18:2(9Z,12Z))	0.993776	5.79913e-05	0.00930901
AT1G24330	PC(14:1(9Z)/22:2(13Z,16Z))	-0.993771	5.80854e-05	0.00930901
AT1G56600	TG(16:0/16:1(9Z)/20:5(5Z,8Z,11Z,14Z,17Z))	0.993759	5.82943e-05	0.00930901
AT4G03140	TG(18:1(9Z)/18:2(9Z,12Z)/18:3(9Z,12Z,15Z))	-0.993758	5.8315e-05	0.00930901
AT3G56000	PE(16:0/18:2(9Z,12Z))	0.993753	5.84225e-05	0.00930901
AT2G18700	PC(14:1(9Z)/22:2(13Z,16Z))	0.993752	5.8438e-05	0.00930901
AT2G25440	18:3-Glc-Stigmasterol	-0.993738	5.86966e-05	0.00930901
AT4G08930	18:3-Glc-Sitosterol	0.993734	5.87635e-05	0.00930901
AT1G21245	TG(16:0/16:1(9Z)/20:5(5Z,8Z,11Z,14Z,17Z))	0.993726	5.89194e-05	0.00930901
AT1G21910	PC(16:0/18:2(9Z,12Z))	0.993717	5.90943e-05	0.00930901
AT5G59480	18:3-Glc-Sitosterol	-0.993715	5.91198e-05	0.00930901
AT4G15233	PC(18:1(11Z)/18:3(6Z,9Z,12Z))	0.993709	5.92483e-05	0.00930901
AT4G34970	18:2-Glc-Sitosterol	0.993686	5.96782e-05	0.00930901
AT5G52390	TG(16:0/16:1(9Z)/20:5(5Z,8Z,11Z,14Z,17Z))	0.993677	5.98368e-05	0.00930901
AT4G21840	TG(16:1(9Z)/18:3(9Z,12Z,15Z)/20:5(5Z,8Z,11Z,14Z,17Z))	0.993669	6.00035e-05	0.00930901
AT5G01810	18:2-Glc-Sitosterol	0.993656	6.02328e-05	0.00930901
AT1G23480	18:2-Glc-Sitosterol	0.993653	6.02938e-05	0.00930901
AT2G02950	18:2-Glc-Sitosterol	0.993653	6.03049e-05	0.00930901
AT2G34510	PC(14:1(9Z)/22:2(13Z,16Z))	0.993648	6.03944e-05	0.00930901
AT3G07380	PC(14:1(9Z)/22:1(13Z))	0.993648	6.03966e-05	0.00930901
AT5G03210	PC(14:1(9Z)/22:2(13Z,16Z))	-0.99364	6.05532e-05	0.00930901
AT1G23030	PC(14:1(9Z)/22:2(13Z,16Z))	0.993639	6.05575e-05	0.00930901
AT3G12833	DG(16:1(9Z)/18:0/0:0)	0.993635	6.06483e-05	0.00930901
AT1G23480	PC(14:1(9Z)/22:1(13Z))	0.993623	6.08658e-05	0.00930901
AT5G57550	PC(14:1(9Z)/22:2(13Z,16Z))	0.99362	6.09306e-05	0.00930901
AT2G03090	DG(18:1(9Z)/18:3(9Z,12Z,15Z)/0:0)	-0.993617	6.09756e-05	0.00930901
AT4G03140	DG(18:4(6Z,9Z,12Z,15Z)/16:1(9Z)/0:0)	-0.993604	6.12291e-05	0.00930901
AT5G63450	18:3-Glc-Sitosterol	-0.993601	6.12838e-05	0.00930901
AT3G50280	TG(16:1(9Z)/18:3(9Z,12Z,15Z)/20:5(5Z,8Z,11Z,14Z,17Z))	0.993599	6.13235e-05	0.00930901
AT1G15520	DG(14:1(9Z)/20:5(5Z,8Z,11Z,14Z,17Z)/0:0)	-0.993583	6.16412e-05	0.00930901
AT4G10500	TG(16:0/16:1(9Z)/20:5(5Z,8Z,11Z,14Z,17Z))	0.993577	6.17559e-05	0.00930901
AT3G13520	18:3-Glc-Sitosterol	0.993569	6.19088e-05	0.00930901
AT1G10000	PE(16:0/18:2(9Z,12Z))	0.993568	6.19249e-05	0.00930901
AT1G56060	PC(14:1(9Z)/22:2(13Z,16Z))	-0.993567	6.19459e-05	0.00930901
AT1G11380	18:3-Glc-Sitosterol	0.993567	6.195e-05	0.00930901
AT1G17060	PC(14:1(9Z)/22:2(13Z,16Z))	0.993563	6.20275e-05	0.00930901
AT4G36670	PC(14:1(9Z)/22:2(13Z,16Z))	0.993559	6.2092e-05	0.00930901
AT3G07340	PC(14:1(9Z)/22:2(13Z,16Z))	0.993557	6.21343e-05	0.00930901
AT1G64220	PG(16:1(9Z)/18:3(9Z,12Z,15Z))	0.993555	6.21729e-05	0.00930901
AT3G46660	PC(14:1(9Z)/22:2(13Z,16Z))	-0.993541	6.24339e-05	0.00930901
AT3G06070	PC(14:1(9Z)/22:2(13Z,16Z))	0.99354	6.24605e-05	0.00930901
AT2G33380	TG(18:1(9Z)/18:2(9Z,12Z)/18:3(9Z,12Z,15Z))	0.993525	6.27545e-05	0.0093304
AT2G15880	PC(14:1(9Z)/22:2(13Z,16Z))	0.993515	6.295e-05	0.0093328
AT2G30830	PC(14:1(9Z)/22:2(13Z,16Z))	-0.993507	6.31102e-05	0.0093328
AT2G18680	18:3-Glc-Stigmasterol	-0.993501	6.32222e-05	0.0093328
AT1G68400	PC(14:1(9Z)/22:2(13Z,16Z))	0.993464	6.39461e-05	0.00934415
AT1G55390	PC(14:0/20:3(8Z,11Z,14Z))	0.993442	6.43625e-05	0.00934415
AT5G55090	TG(18:0/18:2(9Z,12Z)/18:3(9Z,12Z,15Z))	0.993436	6.44813e-05	0.00934415
AT5G56880	TG(16:0/16:1(9Z)/20:5(5Z,8Z,11Z,14Z,17Z))	0.99343	6.46109e-05	0.00934415
AT5G65730	18:2-Glc-Sitosterol	0.993412	6.49591e-05	0.00934415
AT1G11362	PE(16:0/18:2(9Z,12Z))	0.993398	6.52448e-05	0.00934415
AT5G52320	PC(14:1(9Z)/22:2(13Z,16Z))	-0.99339	6.53847e-05	0.00934415
AT5G54470	18:3-Glc-Sitosterol	-0.993372	6.57482e-05	0.00934415
AT5G52390	18:3-Glc-Sitosterol	-0.993361	6.59608e-05	0.00934415
AT1G61120	TG(18:1(9Z)/18:2(9Z,12Z)/18:3(9Z,12Z,15Z))	0.993352	6.61535e-05	0.00934415
AT2G29440	PC(14:1(9Z)/22:2(13Z,16Z))	-0.993346	6.62749e-05	0.00934415
AT1G16370	TG(16:1(9Z)/18:3(9Z,12Z,15Z)/20:5(5Z,8Z,11Z,14Z,17Z))	0.993345	6.62937e-05	0.00934415
AT5G01790	TG(16:0/16:1(9Z)/20:5(5Z,8Z,11Z,14Z,17Z))	0.993331	6.65695e-05	0.00934415
AT1G13670	DG(16:1(9Z)/18:3(9Z,12Z,15Z)/0:0)	0.993323	6.67209e-05	0.00934415
AT4G04500	TG(16:0/16:1(9Z)/20:5(5Z,8Z,11Z,14Z,17Z))	0.993317	6.68384e-05	0.00934415
AT2G20880	TG(16:1(9Z)/18:3(9Z,12Z,15Z)/20:5(5Z,8Z,11Z,14Z,17Z))	0.993308	6.70187e-05	0.00934415
AT1G19300	18:3-Glc-Sitosterol	-0.993307	6.70486e-05	0.00934415
AT3G59750	18:2-Glc-Sitosterol	-0.993304	6.70949e-05	0.00934415
AT3G15635	PC(14:1(9Z)/22:1(13Z))	0.993293	6.73347e-05	0.00934415
AT3G29035	TG(16:0/18:2(9Z,12Z)/18:2(9Z,12Z))	-0.993283	6.75296e-05	0.00934415
AT4G16563	PC(16:0/18:2(9Z,12Z))	0.99328	6.75957e-05	0.00934415
AT1G11260	PC(14:1(9Z)/22:2(13Z,16Z))	0.993274	6.77002e-05	0.00934415
AT3G56000	PC(14:1(9Z)/22:2(13Z,16Z))	0.993268	6.78172e-05	0.00934415
AT5G17490	PC(14:1(9Z)/22:2(13Z,16Z))	-0.993267	6.78546e-05	0.00934415
AT2G04515	TG(18:2(9Z,12Z)/18:3(9Z,12Z,15Z)/18:3(9Z,12Z,15Z))	0.993261	6.79687e-05	0.00934415
AT3G02140	18:3-Glc-Sitosterol	0.993257	6.80403e-05	0.00934415
AT1G70500	18:3-Glc-Sitosterol	-0.993257	6.8056e-05	0.00934415
AT1G50040	PC(14:0/20:1(11Z))	0.99325	6.81931e-05	0.00934415
AT2G02950	PC(16:0/18:2(9Z,12Z))	0.993229	6.86214e-05	0.00934415
AT1G67910	PC(14:1(9Z)/22:2(13Z,16Z))	0.993215	6.89061e-05	0.00934415
AT5G25140	PC(16:0/18:2(9Z,12Z))	0.993204	6.91234e-05	0.00934415
AT5G08350	PC(14:0/20:3(8Z,11Z,14Z))	0.993189	6.94169e-05	0.00934415
AT1G66540	TG(16:0/16:1(9Z)/20:5(5Z,8Z,11Z,14Z,17Z))	0.993179	6.96288e-05	0.00934415
AT5G51550	18:3-Glc-Sitosterol	0.99317	6.98082e-05	0.00934415
AT1G70130	TG(16:0/16:1(9Z)/20:5(5Z,8Z,11Z,14Z,17Z))	0.993165	6.99148e-05	0.00934415
AT3G53600	TG(18:1(9Z)/18:2(9Z,12Z)/18:3(9Z,12Z,15Z))	0.993148	7.0262e-05	0.00934415
AT2G39870	PC(16:0/18:2(9Z,12Z))	0.993144	7.03409e-05	0.00934415
AT3G08970	DG(18:0/18:3(9Z,12Z,15Z)/0:0)	0.993141	7.04025e-05	0.00934415
AT5G66110	16:0-Glc-Stigmasterol	0.993131	7.06037e-05	0.00934415
AT1G19610	DG(14:1(9Z)/20:5(5Z,8Z,11Z,14Z,17Z)/0:0)	0.993128	7.06642e-05	0.00934415
AT5G48400	TG(16:1(9Z)/18:3(9Z,12Z,15Z)/20:5(5Z,8Z,11Z,14Z,17Z))	0.993123	7.07802e-05	0.00934415
AT1G55775	PC(14:1(9Z)/22:2(13Z,16Z))	-0.993121	7.08177e-05	0.00934415
AT5G54148	PG(16:1(9Z)/18:3(9Z,12Z,15Z))	0.993112	7.09954e-05	0.00934415
AT2G28120	PC(18:1(11Z)/18:3(6Z,9Z,12Z))	0.993104	7.11725e-05	0.00934415
AT4G03400	PC(14:1(9Z)/22:1(13Z))	0.9931	7.12583e-05	0.00934415
AT1G01480	18:3-Glc-Stigmasterol	-0.993097	7.132e-05	0.00934415
AT5G36925	18:3-Glc-Sitosterol	-0.993082	7.16163e-05	0.00934415
AT5G62280	PC(14:0/20:1(11Z))	0.993071	7.18545e-05	0.00934415
AT3G16240	DG(16:1(9Z)/18:1(9Z)/0:0)	0.993063	7.20115e-05	0.00934415
AT2G34930	TG(16:1(9Z)/18:3(9Z,12Z,15Z)/20:5(5Z,8Z,11Z,14Z,17Z))	0.993062	7.20317e-05	0.00934415
AT2G48030	PC(14:1(9Z)/22:2(13Z,16Z))	0.993054	7.22072e-05	0.00934415
AT3G57270	18:3-Glc-Sitosterol	-0.993039	7.25221e-05	0.00934415
AT3G02840	TG(18:2(9Z,12Z)/18:2(9Z,12Z)/18:3(9Z,12Z,15Z))	0.993033	7.26434e-05	0.00934415
AT1G29290	18:2-Glc-Stigmasterol	-0.993021	7.28864e-05	0.00934415
AT4G27652	TG(16:1(9Z)/18:3(9Z,12Z,15Z)/20:5(5Z,8Z,11Z,14Z,17Z))	0.993009	7.31331e-05	0.00934415
AT2G33570	18:2-Glc-Sitosterol	0.993009	7.31438e-05	0.00934415
AT1G19250	PC(14:1(9Z)/22:2(13Z,16Z))	-0.993008	7.31618e-05	0.00934415
AT1G51780	TG(16:0/16:1(9Z)/20:5(5Z,8Z,11Z,14Z,17Z))	0.993002	7.32968e-05	0.00934415
AT4G01330	PC(14:1(9Z)/22:2(13Z,16Z))	0.992998	7.33726e-05	0.00934415
AT4G37295	TG(18:0/18:2(9Z,12Z)/18:3(9Z,12Z,15Z))	0.992997	7.33848e-05	0.00934415
AT5G60890	PC(14:1(9Z)/22:2(13Z,16Z))	-0.992983	7.36825e-05	0.00934415
AT3G60540	18:3-Glc-Stigmasterol	-0.992983	7.36934e-05	0.00934415
AT5G17350	TG(18:2(9Z,12Z)/18:2(9Z,12Z)/18:3(9Z,12Z,15Z))	0.99298	7.37509e-05	0.00934415
AT1G61610	TG(16:1(9Z)/18:3(9Z,12Z,15Z)/20:5(5Z,8Z,11Z,14Z,17Z))	0.992977	7.38132e-05	0.00934415
AT5G12940	PC(14:1(9Z)/22:2(13Z,16Z))	-0.992975	7.38621e-05	0.00934415
AT1G68400	18:3-Glc-Sitosterol	0.992971	7.39363e-05	0.00934415
AT2G25900	TG(20:4(5Z,8Z,11Z,14Z)/22:6(4Z,7Z,10Z,13Z,16Z,19Z)/22:6(4Z,7Z,10Z,13Z,16Z,19Z))	0.992969	7.39693e-05	0.00934415
AT5G12340	TG(16:0/16:1(9Z)/20:5(5Z,8Z,11Z,14Z,17Z))	0.992963	7.40971e-05	0.00934415
AT1G72240	PC(14:1(9Z)/22:2(13Z,16Z))	-0.992937	7.46511e-05	0.00934415
AT4G01360	PC(14:1(9Z)/22:2(13Z,16Z))	-0.992933	7.47444e-05	0.00934415
AT1G80440	PC(14:1(9Z)/22:2(13Z,16Z))	0.992928	7.48485e-05	0.00934415
AT1G65690	TG(16:0/16:1(9Z)/20:5(5Z,8Z,11Z,14Z,17Z))	0.992928	7.48513e-05	0.00934415
AT1G22110	PI(18:2(9Z,12Z)/22:1(11Z))	0.992926	7.48797e-05	0.00934415
AT1G02380	18:3-Glc-Sitosterol	0.992925	7.4907e-05	0.00934415
AT5G08350	PC(18:2(9Z,12Z)/18:4(6Z,9Z,12Z,15Z))	0.992923	7.49478e-05	0.00934415
AT4G30280	TG(18:2(9Z,12Z)/18:2(9Z,12Z)/18:3(9Z,12Z,15Z))	0.99292	7.50149e-05	0.00934415
AT5G54148	PC(14:1(9Z)/22:1(13Z))	0.992916	7.50908e-05	0.00934415
AT3G49620	PC(14:1(9Z)/22:2(13Z,16Z))	0.992915	7.51122e-05	0.00934415
AT1G48330	TG(18:1(9Z)/18:2(9Z,12Z)/18:3(9Z,12Z,15Z))	0.992873	7.60065e-05	0.00934415
AT5G38130	TG(18:1(9Z)/18:2(9Z,12Z)/18:3(9Z,12Z,15Z))	0.992866	7.61665e-05	0.00934415
AT2G43580	DG(18:0/18:3(9Z,12Z,15Z)/0:0)	0.992848	7.65477e-05	0.00934415
AT1G16500	TG(16:0/16:1(9Z)/20:5(5Z,8Z,11Z,14Z,17Z))	0.992845	7.65972e-05	0.00934415
AT2G43580	TG(16:1(9Z)/18:3(9Z,12Z,15Z)/20:5(5Z,8Z,11Z,14Z,17Z))	0.992843	7.66428e-05	0.00934415
AT4G21870	18:3-Glc-Sitosterol	0.992833	7.6869e-05	0.00934415
AT5G61590	PC(16:0/18:2(9Z,12Z))	0.992828	7.69735e-05	0.00934415
AT5G03120	18:2-Glc-Sitosterol	0.992826	7.70171e-05	0.00934415
AT1G51890	18:3-Glc-Sitosterol	-0.992825	7.70348e-05	0.00934415
AT4G04540	18:3-Glc-Stigmasterol	-0.992821	7.71115e-05	0.00934415
AT1G23390	PC(14:1(9Z)/22:2(13Z,16Z))	0.992817	7.72078e-05	0.00934415
AT2G23690	PC(16:0/18:2(9Z,12Z))	0.992815	7.72522e-05	0.00934415
AT5G44020	18:3-Glc-Sitosterol	0.992815	7.72614e-05	0.00934415
AT1G01680	PC(14:1(9Z)/22:2(13Z,16Z))	-0.992795	7.76838e-05	0.00934415
AT1G76090	PC(14:0/20:1(11Z))	0.992792	7.77529e-05	0.00934415
AT3G28600	TG(18:0/18:2(9Z,12Z)/18:3(9Z,12Z,15Z))	0.992778	7.80574e-05	0.00934415
AT1G55775	18:2-Glc-Sitosterol	-0.992777	7.8063e-05	0.00934415
AT3G22160	18:3-Glc-Sitosterol	-0.992768	7.82597e-05	0.00934415
AT1G65690	DG(14:1(9Z)/20:5(5Z,8Z,11Z,14Z,17Z)/0:0)	-0.992761	7.842e-05	0.00934415
AT4G35100	18:3-Glc-Sitosterol	0.992761	7.84225e-05	0.00934415
AT3G05900	18:3-Glc-Sitosterol	0.992751	7.86352e-05	0.00934415
AT5G63130	PC(18:1(11Z)/18:3(6Z,9Z,12Z))	-0.992743	7.88102e-05	0.00934415
AT2G46400	18:3-Glc-Sitosterol	-0.992736	7.8947e-05	0.00934415
AT4G13340	PC(18:1(11Z)/18:3(6Z,9Z,12Z))	0.992728	7.91339e-05	0.00934415
AT1G20310	TG(16:1(9Z)/18:3(9Z,12Z,15Z)/20:5(5Z,8Z,11Z,14Z,17Z))	0.992723	7.9233e-05	0.00934415
AT1G49032	18:3-Glc-Sitosterol	0.99272	7.93137e-05	0.00934415
AT5G35750	PC(14:1(9Z)/22:2(13Z,16Z))	0.992716	7.93884e-05	0.00934415
AT5G57010	18:3-Glc-Sitosterol	-0.992716	7.93961e-05	0.00934415
AT2G17230	PC(16:0/18:2(9Z,12Z))	0.992713	7.94483e-05	0.00934415
AT3G49620	PE(16:0/18:2(9Z,12Z))	0.992708	7.9576e-05	0.00934415
AT5G25140	16:0-Glc-Stigmasterol	0.992689	7.99737e-05	0.00934647
AT1G32910	PC(14:1(9Z)/22:2(13Z,16Z))	-0.992688	7.99964e-05	0.00934647
AT5G52570	PC(14:1(9Z)/22:2(13Z,16Z))	-0.992682	8.01303e-05	0.00934647
AT5G11140	DG(18:4(6Z,9Z,12Z,15Z)/16:1(9Z)/0:0)	0.992679	8.01988e-05	0.00934647
AT1G22740	PC(14:0/20:1(11Z))	0.99265	8.08378e-05	0.00937881
AT3G25290	DG(18:3(6Z,9Z,12Z)/16:1(9Z)/0:0)	0.992644	8.09684e-05	0.00937881
AT1G78830	PC(14:1(9Z)/22:2(13Z,16Z))	0.992643	8.0985e-05	0.00937881
AT5G17350	TG(18:2(9Z,12Z)/18:3(9Z,12Z,15Z)/18:3(9Z,12Z,15Z))	0.992636	8.11452e-05	0.00937881
AT5G59580	DG(14:1(9Z)/20:5(5Z,8Z,11Z,14Z,17Z)/0:0)	-0.992622	8.14478e-05	0.00937881
AT1G11362	PC(14:1(9Z)/22:2(13Z,16Z))	0.992619	8.1518e-05	0.00937881
AT3G57740	18:3-Glc-Stigmasterol	0.992614	8.16339e-05	0.00937881
AT4G29740	18:2-Glc-Stigmasterol	-0.992611	8.16864e-05	0.00937881
AT2G44130	PC(16:0/18:2(9Z,12Z))	0.992584	8.22933e-05	0.00940446
AT5G67210	18:3-Glc-Sitosterol	-0.992578	8.24162e-05	0.00940446
AT2G30830	18:3-Glc-Sitosterol	-0.992578	8.24271e-05	0.00940446
AT1G76640	TG(18:1(9Z)/18:2(9Z,12Z)/18:3(9Z,12Z,15Z))	0.992571	8.25717e-05	0.00940446
AT5G51550	PC(14:1(9Z)/22:2(13Z,16Z))	0.992522	8.36813e-05	0.00940446
AT5G06980	18:2-Glc-Sitosterol	0.992511	8.39077e-05	0.00940446
AT5G49480	18:3-Glc-Sitosterol	-0.992509	8.39522e-05	0.00940446
AT5G65390	DG(16:1(9Z)/18:1(9Z)/0:0)	0.992506	8.40242e-05	0.00940446
AT2G45940	DG(18:1(9Z)/18:3(9Z,12Z,15Z)/0:0)	-0.992496	8.42543e-05	0.00940446
AT5G47850	PC(14:1(9Z)/22:2(13Z,16Z))	-0.992494	8.42973e-05	0.00940446
AT1G02620	18:3-Glc-Sitosterol	0.992491	8.43687e-05	0.00940446
AT1G69610	TG(16:1(9Z)/18:3(9Z,12Z,15Z)/20:5(5Z,8Z,11Z,14Z,17Z))	0.992481	8.45815e-05	0.00940446
AT3G57740	PC(14:0/20:1(11Z))	0.992479	8.46323e-05	0.00940446
AT5G25260	TG(16:0/16:1(9Z)/20:5(5Z,8Z,11Z,14Z,17Z))	0.992468	8.48742e-05	0.00940446
AT5G25240	PC(16:0/18:2(9Z,12Z))	0.992459	8.50926e-05	0.00940446
AT5G20250	18:3-Glc-Sitosterol	0.992455	8.5175e-05	0.00940446
AT1G53340	PC(14:0/20:1(11Z))	0.992452	8.52351e-05	0.00940446
AT1G01480	Cer(t18:1(8E)/26:0(2OH[R]))	-0.992429	8.5762e-05	0.00940446
AT2G22500	18:2-Glc-Sitosterol	-0.992424	8.58833e-05	0.00940446
AT5G22920	PC(14:0/20:1(11Z))	0.992418	8.60049e-05	0.00940446
AT4G08170	TG(16:1(9Z)/18:3(9Z,12Z,15Z)/20:5(5Z,8Z,11Z,14Z,17Z))	0.992413	8.61258e-05	0.00940446
AT4G11460	PC(18:2(9Z,12Z)/18:4(6Z,9Z,12Z,15Z))	0.992406	8.62791e-05	0.00940446
AT2G39650	TG(18:2(9Z,12Z)/18:2(9Z,12Z)/18:3(9Z,12Z,15Z))	0.992401	8.63928e-05	0.00940446
AT1G43160	TG(16:0/16:1(9Z)/20:5(5Z,8Z,11Z,14Z,17Z))	0.992369	8.71221e-05	0.00940446
AT5G59580	TG(16:0/16:1(9Z)/20:5(5Z,8Z,11Z,14Z,17Z))	0.992361	8.73168e-05	0.00940446
AT1G25230	PC(14:0/20:1(11Z))	0.992358	8.73741e-05	0.00940446
AT1G77640	DG(18:4(6Z,9Z,12Z,15Z)/16:1(9Z)/0:0)	-0.992356	8.74309e-05	0.00940446
AT4G15280	18:3-Glc-Sitosterol	-0.992342	8.77351e-05	0.00940446
AT2G38760	18:3-Glc-Sitosterol	-0.992342	8.77518e-05	0.00940446
AT1G03300	TG(16:1(9Z)/18:3(9Z,12Z,15Z)/20:5(5Z,8Z,11Z,14Z,17Z))	-0.992341	8.77552e-05	0.00940446
AT4G34550	DG(18:3(6Z,9Z,12Z)/16:1(9Z)/0:0)	0.992336	8.78862e-05	0.00940446
AT5G67210	PC(14:1(9Z)/22:2(13Z,16Z))	-0.992327	8.80843e-05	0.00940446
AT2G36080	DG(14:1(9Z)/20:5(5Z,8Z,11Z,14Z,17Z)/0:0)	0.992327	8.80853e-05	0.00940446
AT3G26510	PC(14:0/20:1(11Z))	0.992302	8.86522e-05	0.00940446
AT1G18710	TG(18:1(9Z)/18:2(9Z,12Z)/18:3(9Z,12Z,15Z))	0.992302	8.86715e-05	0.00940446
AT5G15430	18:3-Glc-Stigmasterol	-0.9923	8.87122e-05	0.00940446
AT3G21150	PC(16:0/18:2(9Z,12Z))	-0.992298	8.8754e-05	0.00940446
AT1G56720	PC(14:0/20:1(11Z))	0.992291	8.8923e-05	0.00940446
AT5G18937	TG(20:4(5Z,8Z,11Z,14Z)/22:6(4Z,7Z,10Z,13Z,16Z,19Z)/22:6(4Z,7Z,10Z,13Z,16Z,19Z))	0.992279	8.91833e-05	0.00940446
AT3G19680	18:3-Glc-Sitosterol	0.992269	8.94208e-05	0.00940446
AT1G08290	PE(18:3(9Z,12Z,15Z)/18:1(9Z))	0.992257	8.96884e-05	0.00940446
AT2G30010	18:3-Glc-Sitosterol	0.992255	8.97447e-05	0.00940446
AT2G45080	DG(18:3(6Z,9Z,12Z)/16:1(9Z)/0:0)	0.992243	9.00217e-05	0.00940446
AT1G56060	TG(16:1(9Z)/18:3(9Z,12Z,15Z)/20:5(5Z,8Z,11Z,14Z,17Z))	0.992237	9.01657e-05	0.00940446
AT1G11362	PC(18:1(11Z)/18:3(6Z,9Z,12Z))	0.992222	9.05122e-05	0.00940446
AT2G44130	18:3-Glc-Sitosterol	0.992216	9.06396e-05	0.00940446
AT3G49580	PC(16:0/18:2(9Z,12Z))	0.992205	9.09134e-05	0.00940446
AT3G57260	TG(16:0/16:1(9Z)/20:5(5Z,8Z,11Z,14Z,17Z))	0.992197	9.10869e-05	0.00940446
AT1G23390	18:3-Glc-Sitosterol	0.992197	9.10906e-05	0.00940446
AT2G32140	PC(14:1(9Z)/22:2(13Z,16Z))	-0.992184	9.13878e-05	0.00940446
AT1G17990	DG(18:3(6Z,9Z,12Z)/18:3(9Z,12Z,15Z)/0:0)	0.992182	9.1451e-05	0.00940446
AT5G53200	DG(18:1(9Z)/18:3(9Z,12Z,15Z)/0:0)	-0.99218	9.14846e-05	0.00940446
AT1G15670	PC(14:1(9Z)/22:2(13Z,16Z))	0.992169	9.17509e-05	0.00940446
AT5G10280	TG(16:1(9Z)/18:3(9Z,12Z,15Z)/20:5(5Z,8Z,11Z,14Z,17Z))	0.992168	9.17674e-05	0.00940446
AT5G56880	18:3-Glc-Sitosterol	-0.992165	9.18487e-05	0.00940446
AT2G44130	18:2-Glc-Sitosterol	0.992159	9.19715e-05	0.00940446
AT1G51890	DG(14:1(9Z)/20:5(5Z,8Z,11Z,14Z,17Z)/0:0)	-0.992157	9.20255e-05	0.00940446
AT4G21930	Cer(t18:1(8E)/26:0(2OH[R]))	-0.992152	9.21427e-05	0.00940446
AT4G38860	PC(14:1(9Z)/22:2(13Z,16Z))	-0.992139	9.24486e-05	0.00940446
AT5G58650	16:0-Glc-Stigmasterol	0.992137	9.24944e-05	0.00940446
AT2G45180	PC(14:0/20:1(11Z))	0.992136	9.25284e-05	0.00940446
AT5G38130	18:3-Glc-Sitosterol	-0.99213	9.26696e-05	0.00940446
AT1G03300	16:0-Glc-Stigmasterol	0.992114	9.30446e-05	0.00940446
AT1G02650	DG(14:1(9Z)/20:3(8Z,11Z,14Z)/0:0)	0.992113	9.30619e-05	0.00940446
AT4G35100	TG(20:4(5Z,8Z,11Z,14Z)/22:6(4Z,7Z,10Z,13Z,16Z,19Z)/22:6(4Z,7Z,10Z,13Z,16Z,19Z))	0.992099	9.33856e-05	0.00940446
AT1G61800	TG(18:2(9Z,12Z)/18:2(9Z,12Z)/18:3(9Z,12Z,15Z))	0.992096	9.34668e-05	0.00940446
AT4G08930	PC(14:1(9Z)/22:2(13Z,16Z))	0.992069	9.40936e-05	0.00940446
AT5G41070	TG(16:0/16:1(9Z)/20:5(5Z,8Z,11Z,14Z,17Z))	0.992068	9.41288e-05	0.00940446
AT2G37100	TG(16:0/16:1(9Z)/20:5(5Z,8Z,11Z,14Z,17Z))	0.992062	9.42714e-05	0.00940446
AT4G01420	TG(18:1(9Z)/18:2(9Z,12Z)/18:3(9Z,12Z,15Z))	0.992044	9.46892e-05	0.00940446
AT2G39400	18:2-Glc-Sitosterol	0.992042	9.47454e-05	0.00940446
AT4G25433	TG(16:0/16:1(9Z)/20:5(5Z,8Z,11Z,14Z,17Z))	0.992029	9.50637e-05	0.00940446
AT2G06050	TG(16:1(9Z)/18:3(9Z,12Z,15Z)/20:5(5Z,8Z,11Z,14Z,17Z))	0.991999	9.57695e-05	0.00940446
AT3G25760	TG(18:1(9Z)/18:2(9Z,12Z)/18:3(9Z,12Z,15Z))	0.991992	9.59297e-05	0.00940446
AT5G01810	PC(16:0/18:2(9Z,12Z))	0.991982	9.61776e-05	0.00940446
AT1G66390	18:2-Glc-Stigmasterol	-0.99198	9.62299e-05	0.00940446
AT4G01420	DG(18:4(6Z,9Z,12Z,15Z)/16:1(9Z)/0:0)	0.991973	9.63791e-05	0.00940446
AT2G41990	PC(14:0/20:1(11Z))	0.991972	9.64261e-05	0.00940446
AT2G30020	DG(18:1(9Z)/18:3(9Z,12Z,15Z)/0:0)	-0.991967	9.65336e-05	0.00940446
AT5G39610	PC(14:1(9Z)/22:2(13Z,16Z))	0.991957	9.67821e-05	0.00940446
AT4G34810	DG(12:0/22:6(4Z,7Z,10Z,13Z,16Z,19Z)/0:0)	0.991953	9.68628e-05	0.00940446
AT3G61190	18:2-Glc-Stigmasterol	-0.991946	9.70339e-05	0.00940446
AT2G01850	18:3-Glc-Sitosterol	0.991945	9.70517e-05	0.00940446
AT4G22780	18:3-Glc-Sitosterol	-0.99193	9.74273e-05	0.00940446
AT1G55775	PC(16:0/18:2(9Z,12Z))	-0.991927	9.74956e-05	0.00940446
AT5G01790	18:3-Glc-Sitosterol	-0.99192	9.76694e-05	0.00940446
AT2G29490	TG(16:0/16:1(9Z)/20:5(5Z,8Z,11Z,14Z,17Z))	0.991916	9.77534e-05	0.00940446
AT5G56230	PC(18:1(11Z)/18:3(6Z,9Z,12Z))	0.991904	9.80613e-05	0.00940446
AT5G19100	18:3-Glc-Sitosterol	-0.991899	9.8167e-05	0.00940446
AT4G37520	PC(14:0/20:1(11Z))	0.991899	9.81677e-05	0.00940446
AT4G02540	PC(16:0/18:2(9Z,12Z))	0.991896	9.82379e-05	0.00940446
AT3G54920	TG(20:4(5Z,8Z,11Z,14Z)/22:6(4Z,7Z,10Z,13Z,16Z,19Z)/22:6(4Z,7Z,10Z,13Z,16Z,19Z))	0.991893	9.83136e-05	0.00940446
AT5G08350	DG(18:3(6Z,9Z,12Z)/18:3(9Z,12Z,15Z)/0:0)	0.991885	9.85148e-05	0.00940446
AT3G61880	18:3-Glc-Stigmasterol	-0.991882	9.8597e-05	0.00940446
AT1G54010	TG(16:0/16:1(9Z)/20:5(5Z,8Z,11Z,14Z,17Z))	0.991872	9.88341e-05	0.00940446
AT5G25260	18:3-Glc-Sitosterol	-0.991867	9.89491e-05	0.00940446
AT5G25140	PC(14:1(9Z)/22:1(13Z))	0.991864	9.90333e-05	0.00940446
AT1G49032	PC(14:1(9Z)/22:2(13Z,16Z))	0.991856	9.92176e-05	0.00940446
AT5G44680	18:3-Glc-Sitosterol	0.991854	9.92701e-05	0.00940446
AT2G38760	TG(16:0/16:1(9Z)/20:5(5Z,8Z,11Z,14Z,17Z))	0.991847	9.94285e-05	0.00940446
AT2G21510	TG(18:0/18:2(9Z,12Z)/18:3(9Z,12Z,15Z))	0.991836	9.96974e-05	0.00940446
AT1G03870	PC(14:1(9Z)/22:2(13Z,16Z))	0.991812	0.00010029	0.00940446
AT4G08170	PC(14:1(9Z)/22:2(13Z,16Z))	-0.991811	0.000100305	0.00940446
AT2G33570	PC(14:0/20:1(11Z))	0.991811	0.000100308	0.00940446
AT1G05310	TG(20:4(5Z,8Z,11Z,14Z)/22:6(4Z,7Z,10Z,13Z,16Z,19Z)/22:6(4Z,7Z,10Z,13Z,16Z,19Z))	0.991785	0.000100947	0.00940446
AT2G37620	PC(14:1(9Z)/22:2(13Z,16Z))	-0.991772	0.000101269	0.00940446
AT1G74710	18:3-Glc-Sitosterol	-0.991764	0.000101466	0.00940446
AT5G63450	PC(14:1(9Z)/22:2(13Z,16Z))	-0.991757	0.00010165	0.00940446
AT5G65730	PC(14:0/20:1(11Z))	0.991756	0.000101653	0.00940446
AT5G60890	18:3-Glc-Sitosterol	-0.991749	0.00010183	0.00940446
AT1G70560	18:3-Glc-Sitosterol	-0.991748	0.000101871	0.00940446
AT3G49620	PC(18:1(11Z)/18:3(6Z,9Z,12Z))	0.991736	0.000102161	0.00940446
AT1G32960	DG(18:0/18:3(9Z,12Z,15Z)/0:0)	0.991726	0.000102401	0.00940446
AT2G17230	18:2-Glc-Sitosterol	0.991724	0.00010245	0.00940446
AT4G15680	PC(14:0/20:3(8Z,11Z,14Z))	0.991709	0.000102815	0.00940446
AT5G19110	TG(16:1(9Z)/18:3(9Z,12Z,15Z)/20:5(5Z,8Z,11Z,14Z,17Z))	0.991708	0.000102854	0.00940446
AT1G11380	PC(14:1(9Z)/22:2(13Z,16Z))	0.991692	0.000103252	0.00940446
AT3G17120	TG(16:1(9Z)/18:3(9Z,12Z,15Z)/20:5(5Z,8Z,11Z,14Z,17Z))	0.991691	0.000103272	0.00940446
AT1G06000	18:2-Glc-Sitosterol	-0.991684	0.000103445	0.00940446
AT1G65890	18:3-Glc-Sitosterol	-0.991681	0.000103529	0.00940446
AT5G61590	18:2-Glc-Sitosterol	0.991673	0.000103711	0.00940446
AT1G80440	18:3-Glc-Sitosterol	0.991658	0.000104093	0.00940446
AT3G25780	TG(18:1(9Z)/18:2(9Z,12Z)/18:3(9Z,12Z,15Z))	0.991652	0.000104233	0.00940446
AT2G43140	18:3-Glc-Stigmasterol	0.991647	0.000104364	0.00940446
AT3G53600	18:3-Glc-Sitosterol	-0.991631	0.000104777	0.00940446
AT2G25770	DG(16:1(9Z)/18:3(9Z,12Z,15Z)/0:0)	0.991628	0.000104837	0.00940446
AT4G13410	18:2-Glc-Stigmasterol	-0.991622	0.000104988	0.00940446
AT3G30460	DG(18:0/20:5(5Z,8Z,11Z,14Z,17Z)/0:0)	0.991619	0.000105059	0.00940446
AT2G24850	PC(14:1(9Z)/22:2(13Z,16Z))	-0.991618	0.000105099	0.00940446
AT1G70290	PC(16:0/18:2(9Z,12Z))	0.991603	0.000105473	0.00940446
AT1G68840	18:3-Glc-Sitosterol	0.991603	0.000105479	0.00940446
AT3G21150	18:3-Glc-Sitosterol	-0.991599	0.000105579	0.00940446
AT4G33905	TG(16:1(9Z)/18:3(9Z,12Z,15Z)/20:5(5Z,8Z,11Z,14Z,17Z))	0.991595	0.000105657	0.00940446
AT5G67210	TG(16:0/16:1(9Z)/20:5(5Z,8Z,11Z,14Z,17Z))	0.991595	0.000105666	0.00940446
AT2G42360	18:3-Glc-Sitosterol	-0.991592	0.000105735	0.00940446
AT5G39610	PC(18:1(11Z)/18:3(6Z,9Z,12Z))	0.991592	0.000105748	0.00940446
AT2G39400	PC(16:0/18:2(9Z,12Z))	0.991585	0.00010593	0.00940446
AT2G18300	18:2-Glc-Sitosterol	0.991582	0.000105992	0.00940446
AT2G44840	PC(14:1(9Z)/22:2(13Z,16Z))	-0.991581	0.000106022	0.00940446
AT2G06050	PC(14:1(9Z)/22:2(13Z,16Z))	-0.991577	0.000106116	0.00940446
AT2G44940	PC(14:1(9Z)/22:2(13Z,16Z))	-0.991574	0.000106206	0.00940446
AT4G15280	TG(18:1(9Z)/18:2(9Z,12Z)/18:3(9Z,12Z,15Z))	0.991567	0.000106368	0.00940446
AT3G62950	18:3-Glc-Sitosterol	0.991564	0.000106456	0.00940446
AT5G49360	PC(14:1(9Z)/22:2(13Z,16Z))	0.991561	0.000106531	0.00940446
AT1G23480	18:3-Glc-Sitosterol	0.991547	0.00010688	0.00940446
AT4G02540	PC(16:0/20:3(8Z,11Z,14Z))	0.991547	0.000106886	0.00940446
AT2G32130	DG(18:3(6Z,9Z,12Z)/16:1(9Z)/0:0)	0.991531	0.000107286	0.00940446
AT2G45220	18:3-Glc-Stigmasterol	-0.991524	0.000107456	0.00940446
AT5G41070	PC(14:1(9Z)/22:2(13Z,16Z))	-0.991505	0.000107949	0.00940446
AT5G67080	18:3-Glc-Stigmasterol	-0.991499	0.000108101	0.00940446
AT1G11380	PC(16:0/18:2(9Z,12Z))	0.99149	0.00010832	0.00940446
AT1G02640	TG(20:4(5Z,8Z,11Z,14Z)/22:6(4Z,7Z,10Z,13Z,16Z,19Z)/22:6(4Z,7Z,10Z,13Z,16Z,19Z))	0.99149	0.000108333	0.00940446
AT1G03870	18:3-Glc-Sitosterol	0.991488	0.000108383	0.00940446
AT2G39650	TG(18:2(9Z,12Z)/18:3(9Z,12Z,15Z)/18:3(9Z,12Z,15Z))	0.991487	0.000108394	0.00940446
AT5G19190	18:2-Glc-Sitosterol	0.991486	0.000108426	0.00940446
AT1G13670	PC(14:0/20:1(11Z))	0.991484	0.000108468	0.00940446
AT3G57740	Cer(d18:1(8Z)/16:0(2OH[R]))	0.99148	0.000108568	0.00940446
AT5G13700	16:0-Glc-Stigmasterol	-0.991474	0.000108726	0.00940446
AT5G52570	PC(18:1(11Z)/18:3(6Z,9Z,12Z))	-0.991453	0.000109275	0.00940446
AT5G20250	PC(14:0/20:1(11Z))	0.991443	0.000109527	0.00940446
AT5G59510	DG(14:1(9Z)/20:5(5Z,8Z,11Z,14Z,17Z)/0:0)	-0.991435	0.000109732	0.00940446
AT5G10150	PC(14:1(9Z)/22:2(13Z,16Z))	0.991434	0.000109751	0.00940446
AT1G78270	18:2-Glc-Sitosterol	0.991433	0.000109774	0.00940446
AT5G63450	TG(16:0/16:1(9Z)/20:5(5Z,8Z,11Z,14Z,17Z))	0.99143	0.000109845	0.00940446
AT1G72416	PC(14:1(9Z)/22:1(13Z))	0.991429	0.00010988	0.00940446
AT4G21870	PC(16:0/20:3(8Z,11Z,14Z))	0.991428	0.000109903	0.00940446
AT4G10910	Cer(d14:1(4E)/26:0(2OH))	0.991427	0.000109941	0.00940446
AT3G19970	TG(16:1(9Z)/18:3(9Z,12Z,15Z)/20:5(5Z,8Z,11Z,14Z,17Z))	0.99142	0.00011011	0.00940446
AT5G14120	PC(14:1(9Z)/22:2(13Z,16Z))	0.99142	0.000110121	0.00940446
AT5G35750	18:3-Glc-Sitosterol	0.991414	0.000110269	0.00940446
AT5G66110	TG(16:1(9Z)/18:3(9Z,12Z,15Z)/20:5(5Z,8Z,11Z,14Z,17Z))	-0.991411	0.000110347	0.00940446
AT3G59750	PC(16:0/18:2(9Z,12Z))	-0.991388	0.000110938	0.00940446
AT2G06850	TG(20:4(5Z,8Z,11Z,14Z)/22:6(4Z,7Z,10Z,13Z,16Z,19Z)/22:6(4Z,7Z,10Z,13Z,16Z,19Z))	0.991387	0.000110945	0.00940446
AT4G25480	18:3-Glc-Stigmasterol	-0.991385	0.000111013	0.00940446
AT2G28200	PC(14:0/20:1(11Z))	0.991382	0.000111088	0.00940446
AT1G23030	18:3-Glc-Sitosterol	0.991377	0.000111208	0.00940446
AT5G56230	PE(16:0/18:2(9Z,12Z))	0.991367	0.000111471	0.00940446
AT5G56880	TG(18:1(9Z)/18:2(9Z,12Z)/18:3(9Z,12Z,15Z))	0.991355	0.00011177	0.00940446
AT5G44050	PC(14:1(9Z)/22:2(13Z,16Z))	-0.991355	0.000111784	0.00940446
AT1G69260	18:2-Glc-Stigmasterol	-0.991354	0.00011181	0.00940446
AT4G29780	TG(18:2(9Z,12Z)/18:3(9Z,12Z,15Z)/18:3(9Z,12Z,15Z))	0.991329	0.000112451	0.00940446
AT1G70290	PC(18:1(11Z)/18:3(6Z,9Z,12Z))	0.99132	0.00011269	0.00940446
AT5G04190	PC(14:1(9Z)/22:2(13Z,16Z))	0.991312	0.000112894	0.00940446
AT2G23130	18:2-Glc-Sitosterol	0.99131	0.000112942	0.00940446
AT5G38900	18:3-Glc-Stigmasterol	-0.991304	0.000113097	0.00940446
AT1G53625	PC(14:1(9Z)/22:2(13Z,16Z))	-0.991282	0.000113677	0.00940446
AT3G50560	TG(20:4(5Z,8Z,11Z,14Z)/22:6(4Z,7Z,10Z,13Z,16Z,19Z)/22:6(4Z,7Z,10Z,13Z,16Z,19Z))	0.991276	0.000113828	0.00940446
AT5G60270	PC(18:1(11Z)/18:3(6Z,9Z,12Z))	0.991276	0.000113831	0.00940446
AT5G67280	TG(16:0/16:1(9Z)/20:5(5Z,8Z,11Z,14Z,17Z))	0.991272	0.000113942	0.00940446
AT3G23730	TG(20:4(5Z,8Z,11Z,14Z)/22:6(4Z,7Z,10Z,13Z,16Z,19Z)/22:6(4Z,7Z,10Z,13Z,16Z,19Z))	0.991265	0.000114114	0.00940446
AT3G50930	18:3-Glc-Sitosterol	-0.991259	0.000114286	0.00940446
AT1G47130	TG(18:2(9Z,12Z)/18:2(9Z,12Z)/18:3(9Z,12Z,15Z))	0.991258	0.000114304	0.00940446
AT1G70500	TG(16:0/16:1(9Z)/20:5(5Z,8Z,11Z,14Z,17Z))	0.991247	0.000114583	0.00940446
AT4G38860	PC(18:1(11Z)/18:3(6Z,9Z,12Z))	-0.991247	0.000114583	0.00940446
AT1G22740	18:3-Glc-Sitosterol	0.991243	0.000114699	0.00940446
AT5G44130	18:2-Glc-Sitosterol	0.991238	0.000114823	0.00940446
AT2G30020	TG(16:0/18:2(9Z,12Z)/18:3(9Z,12Z,15Z))	0.991237	0.000114862	0.00940446
AT3G21520	PE(18:3(9Z,12Z,15Z)/18:1(9Z))	0.991214	0.000115448	0.00940446
AT2G29300	PC(14:0/20:1(11Z))	0.991199	0.00011584	0.00940446
AT1G77870	TG(18:1(9Z)/18:2(9Z,12Z)/18:3(9Z,12Z,15Z))	0.991192	0.000116027	0.00940446
AT2G04495	PC(14:0/20:1(11Z))	-0.991189	0.000116102	0.00940446
AT3G01830	18:3-Glc-Sitosterol	-0.991189	0.000116113	0.00940446
AT5G63130	PC(16:0/18:2(9Z,12Z))	-0.991186	0.000116183	0.00940446
AT3G61060	18:3-Glc-Sitosterol	0.991179	0.000116383	0.00940446
AT3G49580	18:3-Glc-Sitosterol	0.991177	0.000116423	0.00940446
AT1G68400	PC(16:0/18:2(9Z,12Z))	0.991174	0.000116507	0.00940446
AT1G70560	DG(14:1(9Z)/20:5(5Z,8Z,11Z,14Z,17Z)/0:0)	-0.991166	0.000116726	0.00940446
AT4G23200	18:3-Glc-Sitosterol	-0.991163	0.00011679	0.00940446
AT5G01790	PC(14:1(9Z)/22:2(13Z,16Z))	-0.991163	0.000116801	0.00940446
AT2G45940	TG(16:0/18:2(9Z,12Z)/18:3(9Z,12Z,15Z))	0.991162	0.000116818	0.00940446
AT3G45060	PC(16:0/20:3(8Z,11Z,14Z))	0.991156	0.000116974	0.00940446
AT5G57550	PC(18:1(11Z)/18:3(6Z,9Z,12Z))	0.991156	0.000116978	0.00940446
AT4G21870	18:2-Glc-Sitosterol	0.991156	0.00011699	0.00940446
AT1G11380	18:2-Glc-Sitosterol	0.991154	0.00011704	0.00940446
AT3G60970	DG(18:3(6Z,9Z,12Z)/16:1(9Z)/0:0)	0.991146	0.000117251	0.00940446
AT1G68840	TG(16:0/16:1(9Z)/20:5(5Z,8Z,11Z,14Z,17Z))	-0.991143	0.000117329	0.00940446
AT1G06000	PC(14:1(9Z)/22:2(13Z,16Z))	-0.99113	0.000117678	0.00940446
AT1G80820	PC(14:1(9Z)/22:2(13Z,16Z))	-0.991115	0.000118063	0.00940446
AT2G32510	18:2-Glc-Sitosterol	-0.991111	0.000118174	0.00940446
AT2G13810	DG(14:1(9Z)/20:5(5Z,8Z,11Z,14Z,17Z)/0:0)	-0.991109	0.000118223	0.00940446
AT4G28140	TG(18:1(9Z)/18:2(9Z,12Z)/18:3(9Z,12Z,15Z))	0.991107	0.000118264	0.00940446
AT5G47330	TG(18:2(9Z,12Z)/18:3(9Z,12Z,15Z)/18:3(9Z,12Z,15Z))	0.991097	0.000118534	0.00940446
AT5G66650	PC(14:1(9Z)/22:2(13Z,16Z))	-0.991093	0.000118649	0.00940446
AT5G14360	Cer(d14:1(4E)/26:0(2OH))	0.991081	0.000118963	0.00940446
AT3G01830	PC(14:1(9Z)/22:2(13Z,16Z))	-0.991079	0.000119009	0.00940446
AT1G29640	TG(16:0/16:1(9Z)/20:5(5Z,8Z,11Z,14Z,17Z))	0.991071	0.000119232	0.00940446
AT3G19680	PC(14:1(9Z)/22:2(13Z,16Z))	0.991069	0.000119282	0.00940446
AT5G67480	PC(16:0/18:2(9Z,12Z))	0.991051	0.000119771	0.00940446
AT2G32510	TG(16:1(9Z)/18:3(9Z,12Z,15Z)/20:5(5Z,8Z,11Z,14Z,17Z))	0.991047	0.000119875	0.00940446
AT4G04490	TG(16:0/16:1(9Z)/20:5(5Z,8Z,11Z,14Z,17Z))	0.991045	0.000119919	0.00940446
AT2G38310	TG(20:4(5Z,8Z,11Z,14Z)/22:6(4Z,7Z,10Z,13Z,16Z,19Z)/22:6(4Z,7Z,10Z,13Z,16Z,19Z))	0.991038	0.000120111	0.00940446
AT5G64190	TG(20:4(5Z,8Z,11Z,14Z)/22:6(4Z,7Z,10Z,13Z,16Z,19Z)/22:6(4Z,7Z,10Z,13Z,16Z,19Z))	0.991037	0.000120141	0.00940446
AT1G48100	18:3-Glc-Sitosterol	-0.991033	0.000120238	0.00940446
AT1G11960	TG(16:0/16:1(9Z)/20:5(5Z,8Z,11Z,14Z,17Z))	0.991033	0.000120256	0.00940446
AT3G62610	TG(18:2(9Z,12Z)/18:3(9Z,12Z,15Z)/18:3(9Z,12Z,15Z))	0.991028	0.000120394	0.00940446
AT1G17710	PI(18:2(9Z,12Z)/22:1(11Z))	0.991009	0.000120881	0.00940446
AT1G09930	TG(18:2(9Z,12Z)/18:2(9Z,12Z)/18:3(9Z,12Z,15Z))	0.991009	0.000120885	0.00940446
AT2G32130	PE(16:0/20:5(5Z,8Z,11Z,14Z,17Z))	0.991005	0.000121015	0.00940446
AT5G59340	PC(16:0/20:3(8Z,11Z,14Z))	0.990998	0.000121177	0.00940446
AT4G19420	PC(16:0/20:3(8Z,11Z,14Z))	0.990985	0.000121526	0.00940446
AT2G22770	18:3-Glc-Stigmasterol	-0.990981	0.000121655	0.00940446
AT1G01680	PC(14:0/20:1(11Z))	-0.990978	0.000121727	0.00940446
AT5G54380	PC(16:0/18:2(9Z,12Z))	0.990977	0.000121759	0.00940446
AT2G02950	PC(16:0/20:3(8Z,11Z,14Z))	0.990973	0.000121867	0.00940446
AT5G19110	TG(18:0/18:2(9Z,12Z)/18:3(9Z,12Z,15Z))	0.990968	0.00012201	0.00940446
AT4G37295	DG(16:1(9Z)/18:2(9Z,12Z)/0:0)	0.990955	0.000122349	0.00940446
AT4G34250	TG(16:0/16:1(9Z)/20:5(5Z,8Z,11Z,14Z,17Z))	-0.990947	0.000122566	0.00940446
AT5G52050	18:2-Glc-Stigmasterol	-0.990946	0.000122596	0.00940446
AT5G38710	TG(18:1(9Z)/18:2(9Z,12Z)/18:3(9Z,12Z,15Z))	0.990944	0.000122636	0.00940446
AT4G02540	PC(14:1(9Z)/22:1(13Z))	0.990937	0.000122834	0.00940446
AT1G77210	PC(14:0/20:1(11Z))	0.990937	0.000122841	0.00940446
AT1G72430	18:2-Glc-Sitosterol	0.990937	0.000122843	0.00940446
AT3G24900	DG(18:0/18:3(9Z,12Z,15Z)/0:0)	0.990915	0.000123421	0.00940446
AT2G18300	18:3-Glc-Sitosterol	0.990913	0.000123493	0.00940446
AT2G34500	TG(16:1(9Z)/18:3(9Z,12Z,15Z)/20:5(5Z,8Z,11Z,14Z,17Z))	0.990895	0.000123961	0.00940446
AT1G56720	DG(14:1(9Z)/20:5(5Z,8Z,11Z,14Z,17Z)/0:0)	0.990894	0.000124013	0.00940446
AT1G61930	18:2-Glc-Sitosterol	-0.99089	0.000124111	0.00940446
AT1G32170	PE(16:0/18:2(9Z,12Z))	0.99089	0.000124116	0.00940446
AT4G14640	DG(12:0/22:6(4Z,7Z,10Z,13Z,16Z,19Z)/0:0)	-0.99089	0.000124123	0.00940446
AT1G76640	18:3-Glc-Sitosterol	-0.990868	0.000124703	0.00940446
AT4G34250	PC(14:1(9Z)/22:2(13Z,16Z))	0.990858	0.000124989	0.00940446
AT5G38250	TG(16:1(9Z)/18:3(9Z,12Z,15Z)/20:5(5Z,8Z,11Z,14Z,17Z))	0.990857	0.000125003	0.00940446
AT5G59480	TG(16:0/16:1(9Z)/20:5(5Z,8Z,11Z,14Z,17Z))	0.990847	0.000125281	0.00940446
AT5G45630	TG(18:1(9Z)/18:2(9Z,12Z)/18:3(9Z,12Z,15Z))	0.990843	0.0001254	0.00940446
AT2G25900	PC(14:0/20:1(11Z))	0.990839	0.000125489	0.00940446
AT1G72920	18:3-Glc-Sitosterol	-0.990834	0.000125626	0.00940446
AT1G18710	TG(16:0/16:1(9Z)/20:5(5Z,8Z,11Z,14Z,17Z))	0.990833	0.000125655	0.00940446
AT3G02840	TG(18:2(9Z,12Z)/18:3(9Z,12Z,15Z)/18:3(9Z,12Z,15Z))	0.990831	0.000125719	0.00940446
AT2G02950	18:3-Glc-Sitosterol	0.99083	0.000125758	0.00940446
AT5G58650	PC(14:1(9Z)/22:2(13Z,16Z))	0.990828	0.000125811	0.00940446
AT4G11290	18:3-Glc-Stigmasterol	-0.990821	0.000126007	0.00940446
AT1G56060	18:2-Glc-Sitosterol	-0.990817	0.000126105	0.00940446
AT2G29350	DG(14:1(9Z)/20:5(5Z,8Z,11Z,14Z,17Z)/0:0)	-0.990807	0.000126365	0.00940446
AT1G19300	TG(18:1(9Z)/18:2(9Z,12Z)/18:3(9Z,12Z,15Z))	0.990805	0.000126445	0.00940446
AT3G06070	18:2-Glc-Sitosterol	0.990801	0.000126546	0.00940446
AT3G07340	16:0-Glc-Stigmasterol	0.990796	0.000126688	0.00940446
AT1G02610	18:3-Glc-Sitosterol	0.990788	0.000126887	0.00940446
AT1G53625	18:3-Glc-Stigmasterol	-0.990786	0.000126954	0.00940446
AT1G13340	TG(16:0/16:1(9Z)/20:5(5Z,8Z,11Z,14Z,17Z))	0.990775	0.000127265	0.00940446
AT1G20310	TG(18:2(9Z,12Z)/18:3(9Z,12Z,15Z)/18:3(9Z,12Z,15Z))	0.990754	0.000127844	0.00940446
AT4G36950	18:3-Glc-Sitosterol	-0.990747	0.000128028	0.00940446
AT5G51790	PC(14:1(9Z)/22:2(13Z,16Z))	0.990746	0.000128069	0.00940446
AT5G65730	18:3-Glc-Sitosterol	0.990737	0.000128319	0.00940446
AT4G28140	TG(16:0/16:1(9Z)/20:5(5Z,8Z,11Z,14Z,17Z))	0.990733	0.000128417	0.00940446
AT2G18300	PC(16:0/18:2(9Z,12Z))	0.990725	0.000128631	0.00940446
AT2G25770	DG(16:1(9Z)/18:1(9Z)/0:0)	0.990706	0.000129155	0.00940446
AT1G74430	TG(18:1(9Z)/18:2(9Z,12Z)/18:3(9Z,12Z,15Z))	0.990698	0.000129389	0.00940446
AT2G22760	TG(16:0/16:1(9Z)/20:5(5Z,8Z,11Z,14Z,17Z))	0.990694	0.000129495	0.00940446
AT1G44130	TG(20:4(5Z,8Z,11Z,14Z)/22:6(4Z,7Z,10Z,13Z,16Z,19Z)/22:6(4Z,7Z,10Z,13Z,16Z,19Z))	-0.99069	0.000129623	0.00940446
AT2G44130	PC(14:1(9Z)/22:2(13Z,16Z))	0.990689	0.000129652	0.00940446
AT2G44840	18:2-Glc-Sitosterol	-0.990684	0.000129776	0.00940446
AT2G39650	18:2-Glc-Sitosterol	-0.990682	0.000129821	0.00940446
AT4G21840	DG(16:1(9Z)/18:2(9Z,12Z)/0:0)	0.990673	0.000130093	0.00940446
AT3G61060	PC(16:0/18:2(9Z,12Z))	0.990671	0.000130139	0.00940446
AT5G12940	PC(18:1(11Z)/18:3(6Z,9Z,12Z))	-0.990669	0.000130197	0.00940446
AT4G17460	PC(14:1(9Z)/22:1(13Z))	0.990658	0.000130489	0.00940446
AT4G17245	PC(14:1(9Z)/22:2(13Z,16Z))	0.990654	0.000130602	0.00940446
AT1G51890	TG(16:0/16:1(9Z)/20:5(5Z,8Z,11Z,14Z,17Z))	0.990654	0.000130615	0.00940446
AT2G04495	TG(16:0/16:1(9Z)/20:5(5Z,8Z,11Z,14Z,17Z))	0.990654	0.000130625	0.00940446
AT3G49790	PC(18:1(11Z)/18:3(6Z,9Z,12Z))	0.990653	0.000130651	0.00940446
AT5G20250	PC(14:1(9Z)/22:2(13Z,16Z))	0.990651	0.000130693	0.00940446
AT4G39670	PC(18:1(11Z)/18:3(6Z,9Z,12Z))	-0.99065	0.000130735	0.00940446
AT3G17120	PC(14:1(9Z)/22:2(13Z,16Z))	-0.990643	0.000130934	0.00940446
AT5G24030	PC(16:0/18:2(9Z,12Z))	0.990641	0.000130975	0.00940446
AT2G25770	TG(20:4(5Z,8Z,11Z,14Z)/22:6(4Z,7Z,10Z,13Z,16Z,19Z)/22:6(4Z,7Z,10Z,13Z,16Z,19Z))	0.990639	0.000131044	0.00940446
AT2G34930	PC(14:1(9Z)/22:2(13Z,16Z))	-0.990637	0.000131095	0.00940446
AT4G21850	18:3-Glc-Sitosterol	-0.990634	0.000131186	0.00940446
AT2G45180	PC(14:1(9Z)/22:2(13Z,16Z))	0.990631	0.000131253	0.00940446
AT2G38310	PC(14:0/20:1(11Z))	0.990623	0.00013147	0.00940446
AT2G33570	18:3-Glc-Sitosterol	0.99062	0.000131566	0.00940446
AT1G15520	PC(14:0/20:1(11Z))	-0.990603	0.000132036	0.00940446
AT3G27415	18:3-Glc-Stigmasterol	-0.990602	0.000132056	0.00940446
AT3G21150	PC(18:1(11Z)/18:3(6Z,9Z,12Z))	-0.990594	0.00013228	0.00940446
AT2G39650	16:0-Glc-Stigmasterol	-0.990593	0.00013233	0.00940446
AT4G21870	PC(16:0/18:2(9Z,12Z))	0.990591	0.000132389	0.00940446
AT5G01100	18:2-Glc-Sitosterol	-0.990587	0.000132482	0.00940446
AT5G22630	PC(14:1(9Z)/22:2(13Z,16Z))	-0.990586	0.000132508	0.00940446
AT2G20835	PC(16:0/20:3(8Z,11Z,14Z))	0.990564	0.000133135	0.00940446
AT1G20823	18:2-Glc-Sitosterol	-0.99056	0.000133252	0.00940446
AT1G02400	PC(14:1(9Z)/22:2(13Z,16Z))	-0.990543	0.000133721	0.00940446
AT3G02840	TG(16:1(9Z)/18:3(9Z,12Z,15Z)/20:5(5Z,8Z,11Z,14Z,17Z))	0.990528	0.000134154	0.00940446
AT1G26210	16:0-Glc-Stigmasterol	0.990525	0.000134238	0.00940446
AT2G24850	18:3-Glc-Sitosterol	-0.990524	0.000134268	0.00940446
AT4G36670	PC(18:1(11Z)/18:3(6Z,9Z,12Z))	0.990523	0.000134292	0.00940446
AT4G17245	PC(14:0/20:1(11Z))	0.990522	0.000134315	0.00940446
AT4G25433	PC(14:1(9Z)/22:2(13Z,16Z))	-0.990518	0.000134423	0.00940446
AT1G78070	18:3-Glc-Sitosterol	-0.990517	0.000134462	0.00940446
AT2G33380	TG(16:0/16:1(9Z)/20:5(5Z,8Z,11Z,14Z,17Z))	0.990516	0.000134502	0.00940446
AT2G46150	PC(16:0/18:2(9Z,12Z))	-0.990513	0.000134573	0.00940446
AT1G22530	18:3-Glc-Sitosterol	0.990511	0.000134645	0.00940446
AT5G17030	DG(18:0/18:2(9Z,12Z)/0:0)	0.990501	0.000134918	0.00940446
AT1G63820	TG(18:2(9Z,12Z)/18:3(9Z,12Z,15Z)/18:3(9Z,12Z,15Z))	0.9905	0.000134934	0.00940446
AT2G20562	TG(16:0/18:2(9Z,12Z)/18:2(9Z,12Z))	0.990492	0.000135166	0.00940446
AT3G25290	DG(18:0/20:5(5Z,8Z,11Z,14Z,17Z)/0:0)	0.99049	0.000135237	0.00940446
AT2G22500	PC(14:1(9Z)/22:2(13Z,16Z))	-0.990488	0.000135282	0.00940446
AT5G64310	18:2-Glc-Sitosterol	-0.990485	0.000135382	0.00940446
AT4G24380	18:2-Glc-Sitosterol	-0.990482	0.000135468	0.00940446
AT4G15700	DG(18:3(6Z,9Z,12Z)/18:3(9Z,12Z,15Z)/0:0)	0.990475	0.000135661	0.00940446
AT5G14120	PC(14:0/20:1(11Z))	0.990472	0.00013573	0.00940446
AT3G18950	PC(14:1(9Z)/22:2(13Z,16Z))	-0.990469	0.000135824	0.00940446
AT5G66110	PC(16:0/18:2(9Z,12Z))	0.990463	0.000136008	0.00940446
AT2G46400	TG(16:0/16:1(9Z)/20:5(5Z,8Z,11Z,14Z,17Z))	0.990447	0.000136444	0.00940446
AT4G24380	TG(16:1(9Z)/18:3(9Z,12Z,15Z)/20:5(5Z,8Z,11Z,14Z,17Z))	0.990446	0.000136479	0.00940446
AT1G55390	PC(18:2(9Z,12Z)/18:4(6Z,9Z,12Z,15Z))	0.990444	0.00013654	0.00940446
AT4G38825	DG(16:1(9Z)/18:3(9Z,12Z,15Z)/0:0)	0.990441	0.000136631	0.00940446
AT4G25410	Cer(d18:1(8Z)/16:0(2OH[R]))	-0.990425	0.000137085	0.00940446
AT5G03120	PC(16:0/18:2(9Z,12Z))	0.990414	0.000137402	0.00940446
AT5G11590	18:3-Glc-Stigmasterol	-0.99041	0.000137502	0.00940446
AT1G77870	DG(12:0/22:6(4Z,7Z,10Z,13Z,16Z,19Z)/0:0)	-0.9904	0.000137808	0.00940446
AT5G59340	PG(16:1(9Z)/18:3(9Z,12Z,15Z))	0.990393	0.000138012	0.00940446
AT2G17230	18:3-Glc-Sitosterol	0.990386	0.000138193	0.00940446
AT4G17245	18:3-Glc-Sitosterol	0.990376	0.000138472	0.00940446
AT3G59750	PC(18:1(11Z)/18:3(6Z,9Z,12Z))	-0.990373	0.000138563	0.00940446
AT2G44578	TG(18:0/18:2(9Z,12Z)/18:3(9Z,12Z,15Z))	0.99037	0.000138654	0.00940446
AT1G30135	TG(18:1(9Z)/18:2(9Z,12Z)/18:3(9Z,12Z,15Z))	0.990369	0.000138681	0.00940446
AT1G72416	PC(16:0/20:3(8Z,11Z,14Z))	0.990368	0.00013872	0.00940446
AT5G49480	PC(14:1(9Z)/22:2(13Z,16Z))	-0.990359	0.000138986	0.00940446
AT2G32140	TG(16:0/16:1(9Z)/20:5(5Z,8Z,11Z,14Z,17Z))	0.990351	0.000139208	0.00940446
AT3G11402	PC(16:0/20:5(5Z,8Z,11Z,14Z,17Z))	0.990349	0.000139267	0.00940446
AT5G52570	18:3-Glc-Sitosterol	-0.990331	0.000139794	0.00940446
AT3G18950	TG(16:1(9Z)/18:3(9Z,12Z,15Z)/20:5(5Z,8Z,11Z,14Z,17Z))	0.990325	0.00013996	0.00940446
AT2G42580	TG(20:4(5Z,8Z,11Z,14Z)/22:6(4Z,7Z,10Z,13Z,16Z,19Z)/22:6(4Z,7Z,10Z,13Z,16Z,19Z))	0.990323	0.000140013	0.00940446
AT3G25290	Cer(t18:1(8E)/26:0(2OH[R]))	-0.990317	0.000140188	0.00940446
AT4G03400	PC(16:0/20:3(8Z,11Z,14Z))	0.990315	0.000140254	0.00940446
AT5G39610	DG(18:4(6Z,9Z,12Z,15Z)/16:1(9Z)/0:0)	-0.990314	0.000140277	0.00940446
AT5G03270	TG(16:0/16:1(9Z)/20:5(5Z,8Z,11Z,14Z,17Z))	0.990312	0.000140334	0.00940446
AT5G60270	18:3-Glc-Sitosterol	0.990312	0.000140338	0.00940446
AT5G05440	18:3-Glc-Sitosterol	0.990286	0.000141075	0.00940446
AT2G38210	DG(14:1(9Z)/20:5(5Z,8Z,11Z,14Z,17Z)/0:0)	-0.990279	0.00014128	0.00940446
AT1G27460	18:3-Glc-Sitosterol	0.990277	0.00014134	0.00940446
AT2G32150	18:3-Glc-Sitosterol	-0.990269	0.000141583	0.00940446
AT1G72720	PI(18:2(9Z,12Z)/22:1(11Z))	0.990267	0.000141622	0.00940446
AT5G54490	TG(16:1(9Z)/18:3(9Z,12Z,15Z)/20:5(5Z,8Z,11Z,14Z,17Z))	0.990266	0.000141673	0.00940446
AT3G49580	PC(18:1(11Z)/18:3(6Z,9Z,12Z))	0.990265	0.000141699	0.00940446
AT1G23390	PC(16:0/18:2(9Z,12Z))	0.990265	0.000141701	0.00940446
AT3G15450	TG(20:4(5Z,8Z,11Z,14Z)/22:6(4Z,7Z,10Z,13Z,16Z,19Z)/22:6(4Z,7Z,10Z,13Z,16Z,19Z))	0.99026	0.000141832	0.00940446
AT4G38560	DG(14:1(9Z)/20:5(5Z,8Z,11Z,14Z,17Z)/0:0)	-0.990246	0.000142261	0.00940446
AT1G52890	PC(18:1(11Z)/18:3(6Z,9Z,12Z))	-0.99024	0.000142426	0.00940446
AT2G34510	18:3-Glc-Sitosterol	0.990236	0.000142549	0.00940446
AT2G23100	PC(14:1(9Z)/22:2(13Z,16Z))	0.990233	0.000142623	0.00940446
AT4G19420	PC(14:1(9Z)/22:1(13Z))	0.990228	0.000142761	0.00940446
AT5G15430	TG(16:1(9Z)/18:3(9Z,12Z,15Z)/20:5(5Z,8Z,11Z,14Z,17Z))	0.990223	0.000142919	0.00940446
AT2G18700	PC(18:1(11Z)/18:3(6Z,9Z,12Z))	0.990222	0.000142939	0.00940446
AT5G28770	TG(20:4(5Z,8Z,11Z,14Z)/22:6(4Z,7Z,10Z,13Z,16Z,19Z)/22:6(4Z,7Z,10Z,13Z,16Z,19Z))	0.990186	0.000144008	0.00940446
AT5G05440	PC(18:1(11Z)/18:3(6Z,9Z,12Z))	0.990183	0.000144076	0.00940446
AT1G80440	18:2-Glc-Sitosterol	0.990169	0.000144489	0.00940446
AT2G25090	DG(18:4(6Z,9Z,12Z,15Z)/16:1(9Z)/0:0)	-0.990166	0.000144594	0.00940446
AT5G19230	18:3-Glc-Sitosterol	-0.99016	0.000144756	0.00940446
AT5G38250	DG(18:0/18:3(9Z,12Z,15Z)/0:0)	0.99015	0.000145046	0.00940446
AT1G26210	PC(14:1(9Z)/22:1(13Z))	0.99014	0.000145354	0.00940446
AT5G37710	PC(16:0/18:2(9Z,12Z))	0.990139	0.000145387	0.00940446
AT1G36622	TG(16:0/16:1(9Z)/20:5(5Z,8Z,11Z,14Z,17Z))	0.990138	0.000145397	0.00940446
AT3G50760	18:3-Glc-Sitosterol	-0.990134	0.00014552	0.00940446
AT3G07340	PC(16:0/18:2(9Z,12Z))	0.99013	0.000145636	0.00940446
AT2G01850	PC(16:0/18:2(9Z,12Z))	0.990129	0.00014566	0.00940446
AT2G44130	PC(16:0/20:3(8Z,11Z,14Z))	0.990123	0.000145858	0.00940446
AT5G46330	PC(18:1(11Z)/18:3(6Z,9Z,12Z))	0.990122	0.000145881	0.00940446
AT5G08150	PC(14:0/20:1(11Z))	0.990121	0.000145923	0.00940446
AT2G29350	PC(14:0/20:1(11Z))	-0.990106	0.000146356	0.00940446
AT4G10390	TG(16:1(9Z)/18:3(9Z,12Z,15Z)/20:5(5Z,8Z,11Z,14Z,17Z))	0.990104	0.000146398	0.00940446
AT5G06990	PE(18:3(9Z,12Z,15Z)/18:1(9Z))	0.990096	0.000146647	0.00940446
AT1G49200	18:3-Glc-Sitosterol	0.990095	0.000146677	0.00940446
AT5G38310	PC(14:0/20:1(11Z))	-0.990093	0.00014674	0.00940446
AT1G69780	PC(14:0/20:1(11Z))	0.99009	0.000146813	0.00940446
AT2G36540	PC(14:1(9Z)/22:2(13Z,16Z))	0.990082	0.000147064	0.00940446
AT4G17460	16:0-Glc-Stigmasterol	0.990082	0.000147064	0.00940446
AT3G60470	18:3-Glc-Sitosterol	-0.990077	0.000147208	0.00940446
AT2G29300	18:2-Glc-Sitosterol	0.990075	0.000147278	0.00940446
AT3G60540	PC(14:1(9Z)/22:2(13Z,16Z))	-0.990065	0.000147581	0.00940446
AT1G03870	PC(14:0/20:1(11Z))	0.990059	0.000147739	0.00940446
AT3G60130	PC(18:1(11Z)/18:3(6Z,9Z,12Z))	0.990058	0.000147778	0.00940446
AT3G22160	TG(18:1(9Z)/18:2(9Z,12Z)/18:3(9Z,12Z,15Z))	0.990052	0.000147942	0.00940446
AT2G32510	TG(18:2(9Z,12Z)/18:2(9Z,12Z)/18:3(9Z,12Z,15Z))	0.990034	0.000148484	0.00940446
AT5G56230	DG(18:3(6Z,9Z,12Z)/18:3(9Z,12Z,15Z)/0:0)	0.990032	0.000148534	0.00940446
AT1G76650	18:2-Glc-Sitosterol	-0.990032	0.000148556	0.00940446
AT1G10000	PC(16:0/18:2(9Z,12Z))	0.990018	0.000148956	0.00940446
AT5G21940	18:3-Glc-Sitosterol	0.990007	0.000149279	0.00940446
AT3G13750	PC(14:1(9Z)/22:2(13Z,16Z))	0.990004	0.000149377	0.00940446
AT4G19420	PC(14:1(9Z)/22:2(13Z,16Z))	0.990002	0.000149448	0.00940446
AT3G46660	18:3-Glc-Sitosterol	-0.989999	0.000149519	0.00940446
AT2G20880	PC(14:1(9Z)/22:2(13Z,16Z))	-0.989998	0.000149551	0.00940446
AT2G02950	PC(14:1(9Z)/22:2(13Z,16Z))	0.989992	0.000149726	0.00940446
AT1G66090	18:2-Glc-Sitosterol	-0.989982	0.000150046	0.00940446
AT2G44260	18:3-Glc-Stigmasterol	-0.989975	0.000150259	0.00940446
AT1G51890	PC(14:0/20:1(11Z))	-0.989971	0.000150365	0.00940446
AT5G52730	TG(16:0/16:1(9Z)/20:5(5Z,8Z,11Z,14Z,17Z))	0.989965	0.000150535	0.00940446
AT1G10550	PC(14:1(9Z)/22:2(13Z,16Z))	0.989954	0.000150877	0.00940446
AT2G18300	PC(16:0/20:3(8Z,11Z,14Z))	0.989951	0.000150953	0.00940446
AT4G23200	PC(18:1(11Z)/18:3(6Z,9Z,12Z))	-0.989947	0.000151092	0.00940446
AT5G54470	PC(14:0/20:1(11Z))	-0.989946	0.000151104	0.00940446
AT4G28140	18:3-Glc-Sitosterol	-0.989938	0.000151345	0.00940446
AT5G61590	18:3-Glc-Sitosterol	0.989912	0.000152133	0.00940446
AT3G03450	Cer(t18:1(8E)/26:0(2OH[R]))	-0.989909	0.000152224	0.00940446
AT3G06080	18:3-Glc-Sitosterol	0.989905	0.000152336	0.00940446
AT3G57520	PC(18:1(11Z)/18:3(6Z,9Z,12Z))	0.989905	0.000152355	0.00940446
AT1G64390	18:3-Glc-Sitosterol	-0.989903	0.000152419	0.00940446
AT1G54000	18:2-Glc-Stigmasterol	-0.989892	0.000152737	0.00940446
AT4G22590	PC(14:1(9Z)/22:2(13Z,16Z))	-0.989884	0.000152996	0.00940446
AT4G04490	18:3-Glc-Sitosterol	-0.989883	0.000153027	0.00940446
AT4G38825	18:3-Glc-Stigmasterol	0.98988	0.000153108	0.00940446
AT1G67856	TG(18:1(9Z)/18:2(9Z,12Z)/18:3(9Z,12Z,15Z))	0.989876	0.000153221	0.00940446
AT5G18670	18:3-Glc-Sitosterol	0.989873	0.000153322	0.00940446
AT3G24900	18:3-Glc-Stigmasterol	-0.989869	0.000153436	0.00940446
AT5G01100	18:3-Glc-Sitosterol	-0.989865	0.000153566	0.00940446
AT5G63225	PC(16:0/20:3(8Z,11Z,14Z))	-0.989859	0.000153742	0.00940446
AT1G63820	TG(18:2(9Z,12Z)/18:2(9Z,12Z)/18:3(9Z,12Z,15Z))	0.98985	0.000154025	0.00940446
AT1G74100	18:3-Glc-Sitosterol	-0.989849	0.000154045	0.00940446
AT5G16580	DG(14:1(9Z)/20:5(5Z,8Z,11Z,14Z,17Z)/0:0)	0.989846	0.000154133	0.00940446
AT4G37295	DG(18:3(6Z,9Z,12Z)/18:1(9Z)/0:0)	0.989841	0.000154285	0.00940446
AT1G32640	18:3-Glc-Sitosterol	-0.989824	0.000154808	0.00940446
AT2G22770	PC(14:1(9Z)/22:2(13Z,16Z))	-0.989824	0.000154809	0.00940446
AT5G23870	PC(14:1(9Z)/22:2(13Z,16Z))	0.989821	0.000154896	0.00940446
AT3G50280	PC(14:1(9Z)/22:2(13Z,16Z))	-0.989815	0.000155065	0.00940446
AT2G29350	18:3-Glc-Sitosterol	-0.989805	0.00015537	0.00940446
AT1G61930	PC(14:1(9Z)/22:2(13Z,16Z))	-0.989799	0.000155549	0.00940446
AT5G59730	18:2-Glc-Sitosterol	-0.989783	0.000156055	0.00940446
AT2G38760	PC(16:0/18:2(9Z,12Z))	-0.989782	0.000156063	0.00940446
AT5G52730	PC(18:1(11Z)/18:3(6Z,9Z,12Z))	-0.989781	0.000156112	0.00940446
AT4G01360	18:2-Glc-Sitosterol	-0.989777	0.000156221	0.00940446
AT5G49480	TG(16:0/16:1(9Z)/20:5(5Z,8Z,11Z,14Z,17Z))	0.989773	0.000156354	0.00940446
AT3G10020	PC(18:1(11Z)/18:3(6Z,9Z,12Z))	0.98977	0.000156451	0.00940446
AT2G28120	18:2-Glc-Sitosterol	0.989769	0.000156484	0.00940446
AT2G18690	18:2-Glc-Sitosterol	-0.989767	0.000156533	0.00940446
AT5G13700	PC(14:1(9Z)/22:2(13Z,16Z))	-0.989763	0.000156657	0.00940446
AT1G33960	18:2-Glc-Sitosterol	-0.989763	0.000156659	0.00940446
AT2G29490	18:3-Glc-Sitosterol	-0.989759	0.000156791	0.00940446
AT1G52890	PC(16:0/18:2(9Z,12Z))	-0.989741	0.000157323	0.00940446
AT4G34790	PE(16:0/18:2(9Z,12Z))	0.989741	0.000157337	0.00940446
AT1G11190	DG(18:3(6Z,9Z,12Z)/16:1(9Z)/0:0)	0.98974	0.000157359	0.00940446
AT1G17990	PC(16:0/20:5(5Z,8Z,11Z,14Z,17Z))	0.989734	0.000157551	0.00940446
AT1G68840	PC(14:1(9Z)/22:2(13Z,16Z))	0.989733	0.000157589	0.00940446
AT1G35140	PC(18:1(11Z)/18:3(6Z,9Z,12Z))	0.989724	0.000157862	0.00940446
AT2G18690	TG(16:1(9Z)/18:3(9Z,12Z,15Z)/20:5(5Z,8Z,11Z,14Z,17Z))	0.98972	0.00015798	0.00940446
AT1G77210	PC(14:1(9Z)/22:2(13Z,16Z))	0.989719	0.000157992	0.00940446
AT1G65890	PC(18:1(11Z)/18:3(6Z,9Z,12Z))	-0.989717	0.000158074	0.00940446
AT1G27460	PC(14:1(9Z)/22:2(13Z,16Z))	0.989715	0.00015812	0.00940446
AT1G78830	18:3-Glc-Sitosterol	0.989697	0.000158666	0.00940446
AT5G18470	DG(18:0/18:3(9Z,12Z,15Z)/0:0)	0.989694	0.000158786	0.00940446
AT1G15125	PC(14:0/20:1(11Z))	0.989691	0.000158872	0.00940446
AT1G44130	18:3-Glc-Sitosterol	-0.989687	0.000158994	0.00940446
AT5G21170	TG(20:4(5Z,8Z,11Z,14Z)/22:6(4Z,7Z,10Z,13Z,16Z,19Z)/22:6(4Z,7Z,10Z,13Z,16Z,19Z))	0.989686	0.000159029	0.00940446
AT5G22380	TG(16:0/16:1(9Z)/20:5(5Z,8Z,11Z,14Z,17Z))	0.989685	0.000159047	0.00940446
AT5G22545	TG(18:1(9Z)/18:2(9Z,12Z)/18:3(9Z,12Z,15Z))	0.989668	0.000159569	0.00940446
AT1G77640	PC(14:0/20:3(8Z,11Z,14Z))	0.989651	0.000160105	0.00940446
AT1G49032	18:2-Glc-Sitosterol	0.989638	0.000160509	0.00940446
AT1G09155	DG(18:3(6Z,9Z,12Z)/16:1(9Z)/0:0)	0.989636	0.000160561	0.00940446
AT2G22880	18:2-Glc-Sitosterol	-0.989636	0.000160574	0.00940446
AT5G54148	PC(16:0/20:3(8Z,11Z,14Z))	0.989629	0.000160784	0.00940446
AT2G29490	PC(16:0/18:2(9Z,12Z))	-0.989615	0.000161205	0.00940446
AT1G68400	18:2-Glc-Sitosterol	0.98961	0.000161381	0.00940446
AT4G23200	PC(16:0/18:2(9Z,12Z))	-0.989607	0.000161459	0.00940446
AT5G13220	18:3-Glc-Sitosterol	-0.989594	0.000161856	0.00940446
AT5G67210	PC(18:1(11Z)/18:3(6Z,9Z,12Z))	-0.989589	0.000162023	0.00940446
AT3G30460	DG(18:3(6Z,9Z,12Z)/16:1(9Z)/0:0)	0.989579	0.000162333	0.00940446
AT2G20340	PC(14:1(9Z)/22:2(13Z,16Z))	-0.989574	0.00016247	0.00940446
AT5G26920	PC(16:0/18:2(9Z,12Z))	-0.989574	0.0001625	0.00940446
AT3G61060	PC(18:1(11Z)/18:3(6Z,9Z,12Z))	0.989563	0.000162836	0.00940446
AT1G17060	PC(18:1(11Z)/18:3(6Z,9Z,12Z))	0.989545	0.000163376	0.00940446
AT3G15518	18:3-Glc-Stigmasterol	-0.989543	0.000163463	0.00940446
AT2G29490	PC(14:1(9Z)/22:2(13Z,16Z))	-0.989541	0.000163499	0.00940446
AT5G06980	18:3-Glc-Sitosterol	0.989534	0.000163739	0.00940446
AT5G05340	TG(16:0/16:1(9Z)/20:5(5Z,8Z,11Z,14Z,17Z))	0.989531	0.000163822	0.00940446
AT2G18300	PC(14:1(9Z)/22:2(13Z,16Z))	0.98953	0.000163864	0.00940446
AT5G65280	PC(18:1(11Z)/18:3(6Z,9Z,12Z))	-0.989526	0.000163973	0.00940446
AT2G22500	TG(16:1(9Z)/18:3(9Z,12Z,15Z)/20:5(5Z,8Z,11Z,14Z,17Z))	0.989525	0.00016401	0.00940446
AT3G15518	PC(16:0/18:2(9Z,12Z))	-0.989523	0.000164074	0.00940446
AT1G69490	PC(18:1(11Z)/18:3(6Z,9Z,12Z))	0.989514	0.000164343	0.00940446
AT1G27460	PC(14:0/20:1(11Z))	0.989508	0.000164543	0.00940446
AT5G19190	18:3-Glc-Sitosterol	0.989507	0.00016458	0.00940446
AT5G08350	PC(16:0/20:5(5Z,8Z,11Z,14Z,17Z))	0.989506	0.000164624	0.00940446
AT2G15880	18:3-Glc-Sitosterol	0.989504	0.000164677	0.00940446
AT5G28237	18:3-Glc-Sitosterol	-0.989502	0.00016474	0.00940446
AT3G25760	TG(16:0/18:2(9Z,12Z)/18:2(9Z,12Z))	0.989502	0.000164744	0.00940446
AT4G02540	18:3-Glc-Sitosterol	0.989497	0.000164885	0.00940446
AT3G20660	18:3-Glc-Sitosterol	0.989494	0.000164988	0.00940446
AT2G16660	18:3-Glc-Sitosterol	0.98949	0.000165114	0.00940446
AT1G35140	DG(18:4(6Z,9Z,12Z,15Z)/16:1(9Z)/0:0)	-0.989484	0.000165298	0.00940446
AT5G54470	TG(16:0/16:1(9Z)/20:5(5Z,8Z,11Z,14Z,17Z))	0.989484	0.000165305	0.00940446
AT2G32210	TG(16:0/16:1(9Z)/20:5(5Z,8Z,11Z,14Z,17Z))	0.989479	0.000165468	0.00940446
AT5G66110	PC(14:1(9Z)/22:2(13Z,16Z))	0.989467	0.000165821	0.00940446
AT5G51790	PC(16:0/18:2(9Z,12Z))	0.989464	0.000165926	0.00940446
AT4G29780	TG(18:2(9Z,12Z)/18:2(9Z,12Z)/18:3(9Z,12Z,15Z))	0.989459	0.000166074	0.00940446
AT1G77640	PC(18:2(9Z,12Z)/18:4(6Z,9Z,12Z,15Z))	0.989456	0.000166162	0.00940446
AT3G23550	18:3-Glc-Sitosterol	0.989447	0.000166454	0.00940446
AT5G52760	TG(16:0/16:1(9Z)/20:5(5Z,8Z,11Z,14Z,17Z))	0.989443	0.000166595	0.00940446
AT3G46090	18:2-Glc-Stigmasterol	-0.98944	0.000166668	0.00940446
AT4G16740	TG(16:0/18:2(9Z,12Z)/18:3(9Z,12Z,15Z))	0.989436	0.000166821	0.00940446
AT4G03210	18:3-Glc-Sitosterol	0.989434	0.000166871	0.00940446
AT3G49580	18:2-Glc-Sitosterol	0.989433	0.000166887	0.00940446
AT3G54020	18:2-Glc-Sitosterol	-0.989429	0.000167037	0.00940446
AT1G18710	18:3-Glc-Sitosterol	-0.989424	0.0001672	0.00940446
AT3G30460	18:3-Glc-Stigmasterol	-0.98942	0.000167299	0.00940446
AT1G76650	TG(18:2(9Z,12Z)/18:2(9Z,12Z)/18:3(9Z,12Z,15Z))	0.989414	0.000167506	0.00940446
AT1G61800	TG(18:2(9Z,12Z)/18:3(9Z,12Z,15Z)/18:3(9Z,12Z,15Z))	0.989413	0.000167544	0.00940446
AT4G27652	DG(16:1(9Z)/18:2(9Z,12Z)/0:0)	0.989412	0.000167571	0.00940446
AT1G17750	PC(14:1(9Z)/22:2(13Z,16Z))	-0.989411	0.000167591	0.00940446
AT5G56230	PC(16:0/20:5(5Z,8Z,11Z,14Z,17Z))	0.989406	0.00016774	0.00940446
AT2G34500	18:2-Glc-Sitosterol	-0.989393	0.000168167	0.00940446
AT2G23130	PC(18:1(11Z)/18:3(6Z,9Z,12Z))	0.989387	0.00016837	0.00940446
AT3G54400	18:2-Glc-Sitosterol	0.989384	0.000168463	0.00940446
AT5G51550	PC(14:0/20:1(11Z))	0.989381	0.000168551	0.00940446
AT1G11260	18:3-Glc-Sitosterol	0.989379	0.000168598	0.00940446
AT3G57270	PC(16:0/18:2(9Z,12Z))	-0.989378	0.000168645	0.00940446
AT5G02490	PC(16:0/18:2(9Z,12Z))	-0.989377	0.000168672	0.00940446
AT4G04490	PC(14:1(9Z)/22:2(13Z,16Z))	-0.989377	0.000168678	0.00940446
AT1G11670	TG(16:0/18:2(9Z,12Z)/18:2(9Z,12Z))	0.989369	0.000168926	0.00940446
AT4G39670	PC(16:0/18:2(9Z,12Z))	-0.989365	0.000169065	0.00940446
AT2G32210	TG(18:1(9Z)/18:2(9Z,12Z)/18:3(9Z,12Z,15Z))	0.989357	0.000169305	0.00940446
AT5G44020	PC(14:1(9Z)/22:2(13Z,16Z))	0.989354	0.000169403	0.00940446
AT1G49210	DG(18:4(6Z,9Z,12Z,15Z)/16:1(9Z)/0:0)	-0.989345	0.000169678	0.00940446
AT3G24900	DG(18:3(6Z,9Z,12Z)/16:1(9Z)/0:0)	0.989344	0.000169715	0.00940446
AT3G21150	TG(16:0/16:1(9Z)/20:5(5Z,8Z,11Z,14Z,17Z))	0.989338	0.000169922	0.00940446
AT4G16750	DG(18:0/18:2(9Z,12Z)/0:0)	0.989333	0.000170064	0.00940446
AT5G15350	TG(20:4(5Z,8Z,11Z,14Z)/22:6(4Z,7Z,10Z,13Z,16Z,19Z)/22:6(4Z,7Z,10Z,13Z,16Z,19Z))	0.989331	0.000170122	0.00940446
AT5G03355	PC(18:1(11Z)/18:3(6Z,9Z,12Z))	0.989325	0.000170332	0.00940446
AT1G23390	PC(14:0/20:1(11Z))	0.989318	0.000170549	0.00940446
AT3G26510	PC(14:1(9Z)/22:2(13Z,16Z))	0.98931	0.000170803	0.00940446
AT5G63130	18:3-Glc-Sitosterol	-0.989308	0.000170856	0.00940446
AT5G42380	DG(18:1(9Z)/18:3(9Z,12Z,15Z)/0:0)	-0.989298	0.000171196	0.00940446
AT1G21910	PE(16:0/18:2(9Z,12Z))	0.989296	0.000171252	0.00940446
AT1G22740	TG(20:4(5Z,8Z,11Z,14Z)/22:6(4Z,7Z,10Z,13Z,16Z,19Z)/22:6(4Z,7Z,10Z,13Z,16Z,19Z))	0.989295	0.000171295	0.00940446
AT5G01560	DG(18:0/18:2(9Z,12Z)/0:0)	0.989293	0.000171338	0.00940446
AT2G39400	PC(18:1(11Z)/18:3(6Z,9Z,12Z))	0.989293	0.000171347	0.00940446
AT1G02610	PC(16:0/18:2(9Z,12Z))	0.989292	0.000171373	0.00940446
AT2G01850	18:2-Glc-Sitosterol	0.989291	0.000171398	0.00940446
AT3G60470	PC(14:0/20:1(11Z))	-0.989279	0.000171799	0.00940446
AT5G06760	PE(16:0/20:5(5Z,8Z,11Z,14Z,17Z))	0.989272	0.000172022	0.00940446
AT5G03210	18:3-Glc-Stigmasterol	-0.989268	0.000172133	0.00940446
AT5G64310	TG(18:2(9Z,12Z)/18:3(9Z,12Z,15Z)/18:3(9Z,12Z,15Z))	0.989255	0.000172574	0.00940446
AT4G11460	PC(14:0/20:3(8Z,11Z,14Z))	0.989253	0.000172611	0.00940446
AT5G44260	PC(14:1(9Z)/22:2(13Z,16Z))	0.989252	0.000172662	0.00940446
AT4G34410	18:2-Glc-Sitosterol	-0.989249	0.000172745	0.00940446
AT1G69780	PC(14:1(9Z)/22:2(13Z,16Z))	0.989247	0.000172811	0.00940446
AT5G44680	PC(16:0/18:2(9Z,12Z))	0.989244	0.000172907	0.00940446
AT1G50040	18:2-Glc-Sitosterol	0.989244	0.000172927	0.00940446
AT3G44450	TG(16:0/16:1(9Z)/20:5(5Z,8Z,11Z,14Z,17Z))	0.989237	0.000173142	0.00940446
AT4G09300	PC(18:1(11Z)/18:3(6Z,9Z,12Z))	-0.989233	0.000173284	0.00940446
AT1G33240	PC(18:1(11Z)/18:3(6Z,9Z,12Z))	0.989227	0.000173447	0.00940446
AT1G03457	DG(16:1(9Z)/18:1(9Z)/0:0)	0.989227	0.000173448	0.00940446
AT3G48520	PC(14:1(9Z)/22:2(13Z,16Z))	-0.989225	0.000173517	0.00940446
AT1G17750	18:2-Glc-Sitosterol	-0.989217	0.000173792	0.00940446
AT3G22275	TG(18:1(9Z)/18:2(9Z,12Z)/18:3(9Z,12Z,15Z))	0.989207	0.000174115	0.00940446
AT1G53340	18:2-Glc-Sitosterol	0.989205	0.00017418	0.00940446
AT4G36950	PC(18:1(11Z)/18:3(6Z,9Z,12Z))	-0.989199	0.00017435	0.00940446
AT1G80920	PC(14:1(9Z)/22:2(13Z,16Z))	0.989198	0.000174383	0.00940446
AT4G34250	PC(18:1(11Z)/18:3(6Z,9Z,12Z))	0.98919	0.000174667	0.00940446
AT3G06080	PC(18:1(11Z)/18:3(6Z,9Z,12Z))	0.989188	0.000174706	0.00940446
AT3G56260	TG(16:0/16:1(9Z)/20:5(5Z,8Z,11Z,14Z,17Z))	0.98918	0.000174962	0.00940446
AT5G51850	PE(16:0/20:5(5Z,8Z,11Z,14Z,17Z))	0.98918	0.000174972	0.00940446
AT2G32510	16:0-Glc-Stigmasterol	-0.989176	0.000175103	0.00940446
AT3G19680	18:2-Glc-Sitosterol	0.989175	0.000175134	0.00940446
AT5G23210	TG(20:4(5Z,8Z,11Z,14Z)/22:6(4Z,7Z,10Z,13Z,16Z,19Z)/22:6(4Z,7Z,10Z,13Z,16Z,19Z))	0.989165	0.000175465	0.00940446
AT3G54400	18:3-Glc-Sitosterol	0.989164	0.000175503	0.00940446
AT4G34790	18:2-Glc-Sitosterol	0.989155	0.000175786	0.00940446
AT1G19250	TG(16:1(9Z)/18:3(9Z,12Z,15Z)/20:5(5Z,8Z,11Z,14Z,17Z))	0.989152	0.000175868	0.00940446
AT5G08150	PC(16:0/18:2(9Z,12Z))	0.989148	0.000176024	0.00940446
AT2G34500	TG(18:2(9Z,12Z)/18:2(9Z,12Z)/18:3(9Z,12Z,15Z))	0.989146	0.000176087	0.00940446
AT2G29440	PC(18:1(11Z)/18:3(6Z,9Z,12Z))	-0.989141	0.000176248	0.00940446
AT5G08150	18:3-Glc-Stigmasterol	0.989137	0.000176377	0.00940446
AT5G24030	PE(16:0/18:2(9Z,12Z))	0.989128	0.000176665	0.00940446
AT4G15700	PC(16:0/20:5(5Z,8Z,11Z,14Z,17Z))	0.989126	0.000176707	0.00940446
AT2G48030	PC(18:1(11Z)/18:3(6Z,9Z,12Z))	0.989113	0.000177132	0.00940446
AT1G69780	18:3-Glc-Sitosterol	0.989112	0.000177188	0.00940446
AT2G29300	PC(16:0/20:3(8Z,11Z,14Z))	0.989111	0.000177212	0.00940446
AT1G56720	18:3-Glc-Sitosterol	0.989109	0.000177273	0.00940446
AT2G37620	18:3-Glc-Sitosterol	-0.989107	0.000177355	0.00940446
AT5G12940	18:2-Glc-Sitosterol	-0.989098	0.000177626	0.00940446
AT5G03355	PC(14:1(9Z)/22:2(13Z,16Z))	0.989096	0.000177709	0.00940446
AT1G64390	PC(18:1(11Z)/18:3(6Z,9Z,12Z))	-0.989095	0.000177715	0.00940446
AT2G18660	18:3-Glc-Sitosterol	-0.989094	0.000177772	0.00940446
AT5G15350	18:3-Glc-Sitosterol	0.989091	0.000177844	0.00940446
AT2G02950	PC(14:1(9Z)/22:1(13Z))	0.989087	0.000177991	0.00940446
AT1G48100	PC(16:0/18:2(9Z,12Z))	-0.989085	0.000178067	0.00940446
AT1G16500	18:3-Glc-Sitosterol	-0.989083	0.000178115	0.00940446
AT4G23150	TG(16:0/16:1(9Z)/20:5(5Z,8Z,11Z,14Z,17Z))	0.989078	0.000178289	0.00940446
AT1G70290	18:3-Glc-Sitosterol	0.989076	0.000178347	0.00940446
AT5G01810	18:3-Glc-Sitosterol	0.989065	0.000178715	0.00940446
AT5G22380	PC(14:0/20:1(11Z))	-0.989057	0.000178966	0.00940446
AT1G48330	TG(16:0/16:1(9Z)/20:5(5Z,8Z,11Z,14Z,17Z))	0.98905	0.000179199	0.00940446
AT2G23130	18:3-Glc-Sitosterol	0.989047	0.000179288	0.00940446
AT2G46660	Cer(t18:1(8E)/26:0(2OH[R]))	-0.989042	0.00017946	0.00940446
AT5G18670	PC(16:0/20:3(8Z,11Z,14Z))	0.98904	0.000179522	0.00940446
AT4G01360	TG(16:1(9Z)/18:3(9Z,12Z,15Z)/20:5(5Z,8Z,11Z,14Z,17Z))	0.989038	0.000179598	0.00940446
AT5G52760	DG(12:0/22:6(4Z,7Z,10Z,13Z,16Z,19Z)/0:0)	-0.989037	0.000179625	0.00940446
AT2G40230	TG(16:1(9Z)/18:3(9Z,12Z,15Z)/20:5(5Z,8Z,11Z,14Z,17Z))	0.989031	0.00017981	0.00940446
AT5G11160	18:2-Glc-Sitosterol	0.989027	0.000179965	0.00940446
AT3G59750	16:0-Glc-Stigmasterol	-0.989026	0.000179971	0.00940446
AT5G21940	TG(16:0/16:1(9Z)/20:5(5Z,8Z,11Z,14Z,17Z))	-0.989025	0.00018003	0.00940446
AT4G08930	PC(14:0/20:1(11Z))	0.989019	0.000180206	0.00940446
AT1G28480	18:3-Glc-Sitosterol	-0.989018	0.000180249	0.00940446
AT4G13410	TG(16:0/18:2(9Z,12Z)/18:3(9Z,12Z,15Z))	0.989012	0.000180451	0.00940446
AT5G25140	PC(16:0/20:3(8Z,11Z,14Z))	0.98901	0.000180504	0.00940446
AT2G38750	PC(14:1(9Z)/22:2(13Z,16Z))	-0.98901	0.000180519	0.00940446
AT2G06050	18:2-Glc-Sitosterol	-0.989007	0.000180616	0.00940446
AT1G16370	18:2-Glc-Sitosterol	-0.989006	0.000180633	0.00940446
AT3G19680	PC(16:0/20:3(8Z,11Z,14Z))	0.989002	0.000180756	0.00940446
AT1G33960	PC(14:0/20:1(11Z))	-0.988995	0.000181003	0.00940446
AT1G32640	PC(14:1(9Z)/22:2(13Z,16Z))	-0.988994	0.00018102	0.00940446
AT5G52320	18:3-Glc-Sitosterol	-0.988988	0.000181222	0.00940446
AT2G25090	PC(18:1(11Z)/18:3(6Z,9Z,12Z))	0.988982	0.000181421	0.00940446
AT3G13750	18:3-Glc-Sitosterol	0.988976	0.000181632	0.00940446
AT2G18300	PC(14:0/20:1(11Z))	0.988966	0.000181937	0.00940446
AT2G30830	PC(18:1(11Z)/18:3(6Z,9Z,12Z))	-0.988966	0.000181946	0.00940446
AT3G57270	PC(14:1(9Z)/22:2(13Z,16Z))	-0.988961	0.000182101	0.00940446
AT2G16660	PC(14:1(9Z)/22:2(13Z,16Z))	0.988961	0.000182131	0.00940446
AT1G71390	18:2-Glc-Sitosterol	-0.988947	0.000182583	0.00940446
AT2G30830	TG(16:0/16:1(9Z)/20:5(5Z,8Z,11Z,14Z,17Z))	0.988942	0.000182734	0.00940446
AT5G42380	TG(16:0/18:2(9Z,12Z)/18:3(9Z,12Z,15Z))	0.988934	0.00018299	0.00940446
AT5G05220	PC(18:1(11Z)/18:3(6Z,9Z,12Z))	-0.988922	0.000183387	0.00940446
AT4G10390	18:2-Glc-Sitosterol	-0.988913	0.000183694	0.00940446
AT5G26920	PC(18:1(11Z)/18:3(6Z,9Z,12Z))	-0.988909	0.000183838	0.00940446
AT2G38210	18:3-Glc-Sitosterol	-0.988897	0.000184226	0.00940446
AT2G38750	TG(16:1(9Z)/18:3(9Z,12Z,15Z)/20:5(5Z,8Z,11Z,14Z,17Z))	0.988885	0.000184625	0.00940446
AT5G22380	PC(14:1(9Z)/22:2(13Z,16Z))	-0.988881	0.000184745	0.00940446
AT3G54920	18:3-Glc-Sitosterol	0.988873	0.000185043	0.00940446
AT2G25090	PC(14:1(9Z)/22:2(13Z,16Z))	0.988865	0.000185303	0.00940446
AT5G49480	PC(18:1(11Z)/18:3(6Z,9Z,12Z))	-0.988864	0.000185321	0.00940446
AT4G17460	PC(16:0/20:3(8Z,11Z,14Z))	0.988851	0.000185743	0.00940446
AT1G20310	TG(18:2(9Z,12Z)/18:2(9Z,12Z)/18:3(9Z,12Z,15Z))	0.988848	0.000185851	0.00940446
AT1G16420	Cer(t18:1(8E)/26:0(2OH[R]))	-0.988847	0.000185882	0.00940446
AT3G06070	PC(18:1(11Z)/18:3(6Z,9Z,12Z))	0.988846	0.000185936	0.00940446
AT5G16580	TG(16:0/16:1(9Z)/20:5(5Z,8Z,11Z,14Z,17Z))	-0.988843	0.000186019	0.00940446
AT5G54490	PC(14:0/20:1(11Z))	-0.988838	0.000186197	0.00940446
AT1G19610	PC(14:0/20:1(11Z))	0.98883	0.000186454	0.00940446
AT2G45220	MG(18:1(9Z)/0:0/0:0)	0.988827	0.000186561	0.00940446
AT5G52390	TG(18:1(9Z)/18:2(9Z,12Z)/18:3(9Z,12Z,15Z))	0.988826	0.000186591	0.00940446
AT4G21870	PC(14:0/20:1(11Z))	0.98882	0.000186776	0.00940446
AT3G46700	Cer(t18:1(8E)/26:0(2OH[R]))	-0.988818	0.00018684	0.00940446
AT1G61610	18:2-Glc-Sitosterol	-0.988802	0.000187401	0.00940446
AT2G42870	DG(14:1(9Z)/20:5(5Z,8Z,11Z,14Z,17Z)/0:0)	0.988793	0.000187701	0.00940446
AT3G59440	DG(16:1(9Z)/18:3(9Z,12Z,15Z)/0:0)	0.988783	0.000188018	0.00940446
AT1G20070	18:3-Glc-Sitosterol	-0.988776	0.000188256	0.00940446
AT2G38240	PC(14:0/20:1(11Z))	-0.988775	0.000188288	0.00940446
AT4G37520	18:3-Glc-Sitosterol	0.988774	0.000188329	0.00940446
AT1G56660	18:2-Glc-Stigmasterol	-0.988761	0.000188763	0.00940446
AT3G44326	PC(14:0/20:1(11Z))	-0.988759	0.000188814	0.00940446
AT1G52720	PC(14:1(9Z)/22:2(13Z,16Z))	-0.988759	0.000188836	0.00940446
AT5G41070	PE(16:0/18:2(9Z,12Z))	-0.988744	0.000189331	0.00940446
AT5G13320	18:3-Glc-Sitosterol	-0.988738	0.000189528	0.00940446
AT3G09940	18:2-Glc-Sitosterol	-0.988733	0.000189716	0.00940446
AT1G58420	18:2-Glc-Stigmasterol	-0.988732	0.00018973	0.00940446
AT3G05900	TG(20:4(5Z,8Z,11Z,14Z)/22:6(4Z,7Z,10Z,13Z,16Z,19Z)/22:6(4Z,7Z,10Z,13Z,16Z,19Z))	0.988732	0.000189751	0.00940446
AT4G25433	PC(18:1(11Z)/18:3(6Z,9Z,12Z))	-0.988712	0.000190413	0.00940446
AT4G23200	TG(16:0/16:1(9Z)/20:5(5Z,8Z,11Z,14Z,17Z))	0.988708	0.000190536	0.00940446
AT3G26510	18:3-Glc-Sitosterol	0.988707	0.000190583	0.00940446
AT5G44680	18:2-Glc-Sitosterol	0.988706	0.000190617	0.00940446
AT1G55390	PC(16:0/18:2(9Z,12Z))	0.988705	0.000190637	0.00940446
AT5G11590	Cer(t18:1(8E)/26:0(2OH[R]))	-0.988705	0.000190655	0.00940446
AT2G32140	PC(18:1(11Z)/18:3(6Z,9Z,12Z))	-0.988698	0.000190891	0.00940446
AT5G02490	18:3-Glc-Sitosterol	-0.988697	0.000190903	0.00940446
AT3G15518	PC(14:1(9Z)/22:1(13Z))	-0.988697	0.00019092	0.00940446
AT1G17420	18:3-Glc-Sitosterol	-0.988697	0.000190922	0.00940446
AT5G17490	PC(18:1(11Z)/18:3(6Z,9Z,12Z))	-0.988694	0.000191021	0.00940446
AT4G21850	PC(14:0/20:1(11Z))	-0.988691	0.000191114	0.00940446
AT1G17830	18:3-Glc-Sitosterol	-0.98869	0.000191134	0.00940446
AT3G25290	PE(16:0/20:5(5Z,8Z,11Z,14Z,17Z))	0.988681	0.000191449	0.00940446
AT2G03090	TG(16:0/18:2(9Z,12Z)/18:3(9Z,12Z,15Z))	0.988679	0.000191531	0.00940446
AT1G20510	18:3-Glc-Sitosterol	-0.988665	0.000191996	0.00940446
AT3G02170	PC(18:1(11Z)/18:3(6Z,9Z,12Z))	0.988664	0.000192041	0.00940446
AT4G14640	18:2-Glc-Stigmasterol	-0.988662	0.000192113	0.00940446
AT3G13750	PC(14:0/20:1(11Z))	0.988661	0.00019212	0.00940446
AT1G49200	PC(14:1(9Z)/22:2(13Z,16Z))	0.988654	0.000192381	0.00940446
AT3G22961	PG(18:4(6Z,9Z,12Z,15Z)/14:0)	-0.988651	0.000192479	0.00940446
AT1G78440	Cer(t18:1(8E)/26:0(2OH[R]))	-0.988646	0.00019264	0.00940446
AT1G77640	PC(18:1(11Z)/18:3(6Z,9Z,12Z))	0.988643	0.000192732	0.00940446
AT5G44680	PC(14:0/20:1(11Z))	0.98864	0.000192837	0.00940446
AT4G21870	PC(14:1(9Z)/22:1(13Z))	0.988634	0.000193047	0.00940446
AT5G56980	18:3-Glc-Sitosterol	-0.988627	0.000193289	0.00940446
AT4G39700	18:2-Glc-Stigmasterol	-0.988626	0.000193305	0.00940446
AT2G42360	TG(18:1(9Z)/18:2(9Z,12Z)/18:3(9Z,12Z,15Z))	0.988622	0.000193448	0.00940446
AT1G06620	TG(16:0/18:2(9Z,12Z)/18:2(9Z,12Z))	0.988622	0.000193469	0.00940446
AT5G38710	TG(16:0/18:2(9Z,12Z)/18:2(9Z,12Z))	0.988614	0.000193714	0.00940446
AT1G48100	PC(14:0/20:1(11Z))	-0.98861	0.000193871	0.00940446
AT5G08150	18:3-Glc-Sitosterol	0.988603	0.000194094	0.00940446
AT1G61610	PC(14:1(9Z)/22:2(13Z,16Z))	-0.988603	0.000194108	0.00940446
AT5G63450	PC(18:1(11Z)/18:3(6Z,9Z,12Z))	-0.988588	0.000194623	0.00940446
AT1G19250	18:2-Glc-Sitosterol	-0.988587	0.000194643	0.00940446
AT3G62610	TG(18:2(9Z,12Z)/18:2(9Z,12Z)/18:3(9Z,12Z,15Z))	0.988586	0.000194679	0.00940446
AT2G17660	18:3-Glc-Sitosterol	-0.988576	0.000195022	0.00940446
AT1G51760	PC(14:1(9Z)/22:2(13Z,16Z))	-0.988575	0.000195039	0.00940446
AT1G72920	18:2-Glc-Stigmasterol	-0.988575	0.000195048	0.00940446
AT5G05440	PC(16:0/18:2(9Z,12Z))	0.988575	0.000195067	0.00940446
AT5G60890	PC(18:1(11Z)/18:3(6Z,9Z,12Z))	-0.988573	0.000195114	0.00940446
AT5G51465	DG(12:0/22:6(4Z,7Z,10Z,13Z,16Z,19Z)/0:0)	-0.988572	0.00019516	0.00940446
AT3G23240	PE(18:3(9Z,12Z,15Z)/18:1(9Z))	0.98857	0.000195231	0.00940446
AT2G04495	DG(14:1(9Z)/20:5(5Z,8Z,11Z,14Z,17Z)/0:0)	-0.98857	0.000195232	0.00940446
AT2G22760	DG(14:1(9Z)/20:5(5Z,8Z,11Z,14Z,17Z)/0:0)	-0.988567	0.000195331	0.00940446
AT2G24610	18:3-Glc-Stigmasterol	-0.988554	0.000195753	0.00940446
AT5G51790	18:3-Glc-Sitosterol	0.988553	0.000195802	0.00940446
AT2G18660	TG(16:0/16:1(9Z)/20:5(5Z,8Z,11Z,14Z,17Z))	0.988534	0.000196439	0.00940446
AT2G34510	PC(14:0/20:1(11Z))	0.988531	0.000196565	0.00940446
AT1G02400	PC(14:0/20:1(11Z))	-0.988526	0.000196729	0.00940446
AT1G03300	PC(14:1(9Z)/22:2(13Z,16Z))	0.98852	0.000196926	0.00940446
AT1G80440	PC(16:0/20:3(8Z,11Z,14Z))	0.988514	0.000197123	0.00940446
AT5G08150	PC(14:1(9Z)/22:2(13Z,16Z))	0.988505	0.000197434	0.00940446
AT5G66650	18:2-Glc-Sitosterol	-0.988503	0.0001975	0.00940446
AT2G15890	18:2-Glc-Sitosterol	0.988499	0.000197637	0.00940446
AT3G25250	TG(16:1(9Z)/18:3(9Z,12Z,15Z)/20:5(5Z,8Z,11Z,14Z,17Z))	0.988497	0.000197712	0.00940446
AT5G38700	TG(18:1(9Z)/18:2(9Z,12Z)/18:3(9Z,12Z,15Z))	0.988494	0.000197822	0.00940446
AT5G64870	18:2-Glc-Sitosterol	-0.988493	0.000197857	0.00940446
AT1G55775	PC(18:1(11Z)/18:3(6Z,9Z,12Z))	-0.988488	0.000198035	0.00940446
AT3G55110	DG(14:1(9Z)/20:5(5Z,8Z,11Z,14Z,17Z)/0:0)	-0.988483	0.000198211	0.00940446
AT4G21870	PC(14:1(9Z)/22:2(13Z,16Z))	0.988482	0.000198231	0.00940446
AT5G19120	TG(20:4(5Z,8Z,11Z,14Z)/22:6(4Z,7Z,10Z,13Z,16Z,19Z)/22:6(4Z,7Z,10Z,13Z,16Z,19Z))	0.988474	0.000198514	0.00940446
AT2G18660	PC(16:0/18:2(9Z,12Z))	-0.988474	0.000198523	0.00940446
AT5G48920	16:0-Glc-Stigmasterol	-0.988473	0.000198531	0.00940446
AT4G21850	PC(16:0/18:2(9Z,12Z))	-0.988469	0.000198693	0.00940446
AT2G16660	TG(16:0/16:1(9Z)/20:5(5Z,8Z,11Z,14Z,17Z))	-0.988467	0.000198747	0.00940446
AT4G34410	TG(18:2(9Z,12Z)/18:2(9Z,12Z)/18:3(9Z,12Z,15Z))	0.988464	0.000198857	0.00940446
AT2G14290	PC(18:1(11Z)/18:3(6Z,9Z,12Z))	-0.988458	0.000199062	0.00940446
AT5G66650	TG(16:1(9Z)/18:3(9Z,12Z,15Z)/20:5(5Z,8Z,11Z,14Z,17Z))	0.988453	0.000199235	0.00940446
AT5G13320	DG(14:1(9Z)/20:5(5Z,8Z,11Z,14Z,17Z)/0:0)	-0.988447	0.000199453	0.00940446
AT2G18620	TG(20:4(5Z,8Z,11Z,14Z)/22:6(4Z,7Z,10Z,13Z,16Z,19Z)/22:6(4Z,7Z,10Z,13Z,16Z,19Z))	-0.988445	0.000199495	0.00940446
AT1G70640	18:3-Glc-Sitosterol	-0.988438	0.000199762	0.00940446
AT1G78070	DG(14:1(9Z)/20:5(5Z,8Z,11Z,14Z,17Z)/0:0)	-0.98843	0.000200006	0.00940446
AT1G28370	TG(18:2(9Z,12Z)/18:3(9Z,12Z,15Z)/18:3(9Z,12Z,15Z))	0.988427	0.000200133	0.00940446
AT5G46330	18:3-Glc-Sitosterol	0.988421	0.000200321	0.00940446
AT1G80820	TG(16:0/16:1(9Z)/20:5(5Z,8Z,11Z,14Z,17Z))	0.988419	0.000200403	0.00940446
AT2G26400	DG(14:1(9Z)/20:5(5Z,8Z,11Z,14Z,17Z)/0:0)	-0.988418	0.000200426	0.00940446
AT1G02610	18:2-Glc-Sitosterol	0.988407	0.000200827	0.00940446
AT5G19190	PC(18:1(11Z)/18:3(6Z,9Z,12Z))	0.988399	0.000201092	0.00940446
AT1G65690	PC(14:0/20:1(11Z))	-0.988398	0.000201137	0.00940446
AT1G09350	TG(16:0/16:1(9Z)/20:5(5Z,8Z,11Z,14Z,17Z))	0.988397	0.000201158	0.00940446
AT1G78830	PC(14:0/20:1(11Z))	0.988396	0.00020121	0.00940446
AT3G17690	18:3-Glc-Stigmasterol	-0.988394	0.000201255	0.00940446
AT3G46090	18:3-Glc-Sitosterol	-0.988392	0.000201321	0.00940446
AT4G25480	PC(14:1(9Z)/22:2(13Z,16Z))	-0.988391	0.000201363	0.00940446
AT2G18620	PC(14:0/20:1(11Z))	-0.988389	0.000201447	0.00940446
AT3G29250	DG(18:0/18:3(9Z,12Z,15Z)/0:0)	0.988382	0.000201694	0.00940446
AT5G60680	PC(18:1(11Z)/18:3(6Z,9Z,12Z))	0.98838	0.000201736	0.00940446
AT2G43820	PE(16:0/18:2(9Z,12Z))	0.98838	0.000201761	0.00940446
AT5G40210	TG(18:2(9Z,12Z)/18:2(9Z,12Z)/18:3(9Z,12Z,15Z))	0.988376	0.000201894	0.00940446
AT5G54470	PC(14:1(9Z)/22:2(13Z,16Z))	-0.98837	0.000202098	0.00940446
AT5G08150	PC(16:0/20:3(8Z,11Z,14Z))	0.988365	0.00020229	0.00940446
AT2G28200	18:3-Glc-Sitosterol	0.988364	0.000202323	0.00940446
AT5G53750	TG(16:0/18:2(9Z,12Z)/18:2(9Z,12Z))	0.988363	0.000202327	0.00940446
AT1G01680	18:3-Glc-Sitosterol	-0.988356	0.000202593	0.00940446
AT4G02540	PC(14:1(9Z)/22:2(13Z,16Z))	0.988355	0.000202612	0.00940446
AT1G62510	DG(16:1(9Z)/18:1(9Z)/0:0)	0.988347	0.00020291	0.00940446
AT1G21240	PC(14:0/20:1(11Z))	-0.988344	0.000203002	0.00940446
AT3G11402	PC(18:1(11Z)/18:3(6Z,9Z,12Z))	0.988331	0.000203463	0.00940446
AT2G32200	DG(18:3(6Z,9Z,12Z)/16:1(9Z)/0:0)	0.988328	0.00020357	0.00940446
AT3G13520	TG(20:4(5Z,8Z,11Z,14Z)/22:6(4Z,7Z,10Z,13Z,16Z,19Z)/22:6(4Z,7Z,10Z,13Z,16Z,19Z))	0.988324	0.000203707	0.00940446
AT2G47140	Cer(t18:1(8E)/26:0(2OH[R]))	-0.988319	0.000203873	0.00940446
AT1G28330	TG(20:4(5Z,8Z,11Z,14Z)/22:6(4Z,7Z,10Z,13Z,16Z,19Z)/22:6(4Z,7Z,10Z,13Z,16Z,19Z))	0.988312	0.000204133	0.00940446
AT2G15880	PC(14:0/20:1(11Z))	0.988306	0.000204312	0.00940446
AT1G06620	TG(16:0/18:2(9Z,12Z)/18:3(9Z,12Z,15Z))	0.988305	0.000204355	0.00940446
AT5G02490	PC(14:0/20:1(11Z))	-0.988303	0.000204425	0.00940446
AT1G76650	TG(18:2(9Z,12Z)/18:3(9Z,12Z,15Z)/18:3(9Z,12Z,15Z))	0.9883	0.000204549	0.00940446
AT1G78850	Cer(d14:1(4E)/26:0(2OH))	0.988291	0.000204837	0.00940446
AT3G54020	PC(14:1(9Z)/22:2(13Z,16Z))	-0.988287	0.000204979	0.00940446
AT1G02610	PC(18:1(11Z)/18:3(6Z,9Z,12Z))	0.988287	0.000204988	0.00940446
AT5G52320	PC(18:1(11Z)/18:3(6Z,9Z,12Z))	-0.988285	0.000205043	0.00940446
AT4G24380	PC(14:1(9Z)/22:2(13Z,16Z))	-0.988283	0.000205124	0.00940446
AT5G22630	18:2-Glc-Sitosterol	-0.988279	0.000205255	0.00940446
AT1G03457	PC(14:0/20:1(11Z))	0.988276	0.000205372	0.00940446
AT4G15248	TG(16:1(9Z)/18:3(9Z,12Z,15Z)/20:5(5Z,8Z,11Z,14Z,17Z))	0.988275	0.000205393	0.00940446
AT5G47850	PC(14:0/20:1(11Z))	-0.98827	0.00020557	0.00940446
AT2G37100	TG(18:1(9Z)/18:2(9Z,12Z)/18:3(9Z,12Z,15Z))	0.988261	0.000205901	0.00940446
AT3G50770	18:3-Glc-Sitosterol	-0.98826	0.000205931	0.00940446
AT1G49032	PC(14:0/20:1(11Z))	0.988256	0.000206056	0.00940446
AT2G40230	18:2-Glc-Sitosterol	-0.988252	0.000206228	0.00940446
AT1G26210	PC(16:0/20:3(8Z,11Z,14Z))	0.988244	0.000206504	0.00940446
AT1G60190	18:2-Glc-Sitosterol	-0.988242	0.000206548	0.00940446
AT3G57260	PC(14:0/20:1(11Z))	-0.988241	0.000206585	0.00940446
AT1G55775	18:3-Glc-Sitosterol	-0.988239	0.00020667	0.00940446
AT5G12940	PE(16:0/18:2(9Z,12Z))	-0.988237	0.000206745	0.00940446
AT3G02410	TG(18:1(9Z)/18:2(9Z,12Z)/18:3(9Z,12Z,15Z))	-0.988233	0.00020687	0.00940446
AT3G25180	18:2-Glc-Sitosterol	-0.988232	0.000206919	0.00940446
AT2G32510	TG(18:2(9Z,12Z)/18:3(9Z,12Z,15Z)/18:3(9Z,12Z,15Z))	0.988231	0.000206944	0.00940446
AT5G51550	18:2-Glc-Sitosterol	0.988231	0.000206964	0.00940446
AT3G44860	TG(18:0/18:2(9Z,12Z)/18:3(9Z,12Z,15Z))	0.98822	0.000207319	0.00940446
AT5G64310	TG(18:2(9Z,12Z)/18:2(9Z,12Z)/18:3(9Z,12Z,15Z))	0.988212	0.000207604	0.00940446
AT5G48400	DG(16:1(9Z)/18:2(9Z,12Z)/0:0)	0.988209	0.000207715	0.00940446
AT1G32170	DG(18:4(6Z,9Z,12Z,15Z)/16:1(9Z)/0:0)	-0.988203	0.00020793	0.00940446
AT1G69610	18:3-Glc-Stigmasterol	-0.988201	0.000208013	0.00940446
AT4G01330	18:3-Glc-Sitosterol	0.988197	0.000208147	0.00940446
AT5G61590	PC(18:1(11Z)/18:3(6Z,9Z,12Z))	0.988195	0.00020821	0.00940446
AT2G24610	18:3-Glc-Sitosterol	-0.988195	0.00020821	0.00940446
AT1G53340	PC(16:0/20:3(8Z,11Z,14Z))	0.988182	0.000208662	0.00940446
AT4G04490	PC(16:0/18:2(9Z,12Z))	-0.988176	0.000208884	0.00940446
AT3G60970	DG(18:0/18:2(9Z,12Z)/0:0)	0.988172	0.00020904	0.00940446
AT3G11402	DG(18:4(6Z,9Z,12Z,15Z)/16:1(9Z)/0:0)	-0.988168	0.000209152	0.00940446
AT2G28200	18:2-Glc-Sitosterol	0.988167	0.000209189	0.00940446
AT2G36590	TG(16:0/18:2(9Z,12Z)/18:2(9Z,12Z))	0.988165	0.000209276	0.00940446
AT5G26920	TG(16:0/16:1(9Z)/20:5(5Z,8Z,11Z,14Z,17Z))	0.988163	0.000209336	0.00940446
AT3G61060	18:2-Glc-Sitosterol	0.988158	0.000209503	0.00940446
AT4G37295	TG(16:1(9Z)/18:3(9Z,12Z,15Z)/20:5(5Z,8Z,11Z,14Z,17Z))	0.988158	0.000209504	0.00940446
AT2G29440	TG(16:0/16:1(9Z)/20:5(5Z,8Z,11Z,14Z,17Z))	0.988157	0.000209546	0.00940446
AT3G56000	PC(16:0/18:2(9Z,12Z))	0.988157	0.000209551	0.00940446
AT2G30930	PC(18:1(11Z)/18:3(6Z,9Z,12Z))	0.988155	0.000209613	0.00940446
AT3G50140	DG(18:4(6Z,9Z,12Z,15Z)/16:1(9Z)/0:0)	-0.988152	0.000209741	0.00940446
AT3G30460	Cer(t18:1(8E)/26:0(2OH[R]))	-0.988145	0.000209989	0.00940446
AT1G72520	18:2-Glc-Stigmasterol	-0.988143	0.000210056	0.00940446
AT2G01850	PC(18:1(11Z)/18:3(6Z,9Z,12Z))	0.988143	0.000210057	0.00940446
AT1G77210	TG(16:0/16:1(9Z)/20:5(5Z,8Z,11Z,14Z,17Z))	-0.988124	0.00021073	0.00940446
AT5G54470	DG(14:1(9Z)/20:5(5Z,8Z,11Z,14Z,17Z)/0:0)	-0.988114	0.000211074	0.00940446
AT3G43250	DG(18:1(9Z)/18:3(9Z,12Z,15Z)/0:0)	-0.988114	0.000211088	0.00940446
AT2G18300	PC(14:1(9Z)/22:1(13Z))	0.988113	0.0002111	0.00940446
AT2G38760	PC(14:1(9Z)/22:2(13Z,16Z))	-0.988113	0.000211105	0.00940446
AT2G25200	DG(18:4(6Z,9Z,12Z,15Z)/16:1(9Z)/0:0)	-0.988108	0.000211292	0.00940446
AT5G12940	PC(16:0/18:2(9Z,12Z))	-0.988104	0.000211445	0.00940446
AT1G06000	TG(16:1(9Z)/18:3(9Z,12Z,15Z)/20:5(5Z,8Z,11Z,14Z,17Z))	0.988102	0.000211502	0.00940446
AT3G30775	PC(14:0/20:1(11Z))	0.988102	0.000211512	0.00940446
AT5G56230	DG(18:4(6Z,9Z,12Z,15Z)/16:1(9Z)/0:0)	-0.988081	0.000212235	0.00940446
AT1G14280	18:2-Glc-Sitosterol	0.988067	0.000212732	0.00940446
AT3G46660	PC(14:0/20:1(11Z))	-0.988061	0.000212962	0.00940446
AT1G21240	PC(16:0/18:2(9Z,12Z))	-0.988048	0.000213432	0.00940446
AT5G59510	PC(14:0/20:1(11Z))	-0.988039	0.00021374	0.00940446
AT5G35750	PC(14:0/20:1(11Z))	0.988038	0.000213769	0.00940446
AT4G27140	TG(18:1(9Z)/18:2(9Z,12Z)/18:3(9Z,12Z,15Z))	0.988038	0.000213792	0.00940446
AT5G44130	PC(18:1(11Z)/18:3(6Z,9Z,12Z))	0.988033	0.000213967	0.00940446
AT1G72416	16:0-Glc-Stigmasterol	0.98803	0.000214076	0.00940446
AT1G22530	18:2-Glc-Sitosterol	0.98803	0.00021408	0.00940446
AT1G72416	PC(14:1(9Z)/22:2(13Z,16Z))	0.988023	0.000214316	0.00940446
AT4G34250	18:3-Glc-Sitosterol	0.988022	0.000214349	0.00940446
AT2G32210	DG(12:0/22:6(4Z,7Z,10Z,13Z,16Z,19Z)/0:0)	-0.98802	0.000214434	0.00940446
AT1G72430	PC(18:1(11Z)/18:3(6Z,9Z,12Z))	0.988013	0.000214667	0.00940446
AT1G35140	PC(14:1(9Z)/22:2(13Z,16Z))	0.988012	0.000214716	0.00940446
AT2G15890	18:3-Glc-Sitosterol	0.987998	0.000215207	0.00940446
AT4G19420	18:3-Glc-Sitosterol	0.987997	0.000215234	0.00940446
AT4G01080	TG(16:0/18:2(9Z,12Z)/18:2(9Z,12Z))	0.987997	0.000215254	0.00940446
AT1G72540	DG(12:0/22:6(4Z,7Z,10Z,13Z,16Z,19Z)/0:0)	-0.987995	0.000215303	0.00940446
AT1G23030	PC(18:1(11Z)/18:3(6Z,9Z,12Z))	0.987991	0.000215452	0.00940446
AT2G15890	PC(14:0/20:1(11Z))	0.987988	0.00021558	0.00940446
AT3G07340	PC(18:1(11Z)/18:3(6Z,9Z,12Z))	0.987987	0.000215601	0.00940446
AT1G56650	TG(16:0/16:1(9Z)/20:5(5Z,8Z,11Z,14Z,17Z))	0.987986	0.000215626	0.00940446
AT3G62950	TG(20:4(5Z,8Z,11Z,14Z)/22:6(4Z,7Z,10Z,13Z,16Z,19Z)/22:6(4Z,7Z,10Z,13Z,16Z,19Z))	0.987979	0.000215876	0.00940446
AT3G04140	DG(18:3(6Z,9Z,12Z)/16:1(9Z)/0:0)	0.987978	0.000215924	0.00940446
AT5G23870	TG(16:1(9Z)/18:3(9Z,12Z,15Z)/20:5(5Z,8Z,11Z,14Z,17Z))	-0.987974	0.000216072	0.00940446
AT5G51790	PC(14:0/20:1(11Z))	0.987974	0.000216072	0.00940446
AT3G46660	PC(18:1(11Z)/18:3(6Z,9Z,12Z))	-0.987963	0.000216476	0.00940446
AT3G29035	PE(16:0/18:2(9Z,12Z))	0.98796	0.000216568	0.00940446
AT5G41070	TG(18:1(9Z)/18:2(9Z,12Z)/18:3(9Z,12Z,15Z))	0.987959	0.000216592	0.00940446
AT3G20660	PC(14:1(9Z)/22:2(13Z,16Z))	0.987953	0.000216822	0.00940446
AT3G15518	PC(16:0/20:3(8Z,11Z,14Z))	-0.987952	0.000216853	0.00940446
AT3G09940	18:3-Glc-Sitosterol	-0.987948	0.000217005	0.00940446
AT4G23070	PC(16:0/20:5(5Z,8Z,11Z,14Z,17Z))	0.987944	0.00021714	0.00940446
AT1G51760	18:3-Glc-Sitosterol	-0.987944	0.000217147	0.00940446
AT1G78270	DG(14:1(9Z)/20:3(8Z,11Z,14Z)/0:0)	0.987937	0.000217392	0.00940446
AT1G22530	PC(14:0/20:1(11Z))	0.98793	0.000217648	0.00940446
AT1G70290	18:2-Glc-Sitosterol	0.987923	0.000217894	0.00940446
AT2G27690	PC(14:1(9Z)/22:2(13Z,16Z))	-0.987918	0.000218083	0.00940446
AT5G16360	TG(16:0/18:2(9Z,12Z)/18:3(9Z,12Z,15Z))	0.987918	0.000218084	0.00940446
AT2G04495	PC(14:1(9Z)/22:2(13Z,16Z))	-0.987917	0.000218132	0.00940446
AT2G38760	PC(18:1(11Z)/18:3(6Z,9Z,12Z))	-0.987915	0.000218194	0.00940446
AT5G52020	TG(18:0/18:2(9Z,12Z)/18:3(9Z,12Z,15Z))	0.987906	0.000218516	0.00940446
AT4G00700	18:3-Glc-Stigmasterol	-0.987903	0.000218619	0.00940446
AT3G48450	PC(14:1(9Z)/22:2(13Z,16Z))	-0.987899	0.000218778	0.00940446
AT4G16000	PE(16:0/18:2(9Z,12Z))	0.987895	0.00021891	0.00940446
AT1G17830	PC(14:0/20:1(11Z))	-0.987895	0.000218915	0.00940446
AT1G67856	18:3-Glc-Sitosterol	-0.987893	0.000218992	0.00940446
AT1G03300	PC(16:0/18:2(9Z,12Z))	0.987877	0.000219555	0.00940446
AT3G02140	PC(14:1(9Z)/22:2(13Z,16Z))	0.987874	0.000219681	0.00940446
AT3G07380	18:2-Glc-Sitosterol	0.987873	0.000219691	0.00940446
AT1G32170	PC(14:0/20:3(8Z,11Z,14Z))	0.987869	0.000219854	0.00940446
AT3G21320	DG(18:3(6Z,9Z,12Z)/16:1(9Z)/0:0)	0.987868	0.000219879	0.00940446
AT4G35100	DG(14:1(9Z)/20:5(5Z,8Z,11Z,14Z,17Z)/0:0)	0.987867	0.000219919	0.00940446
AT3G57260	DG(14:1(9Z)/20:5(5Z,8Z,11Z,14Z,17Z)/0:0)	-0.987864	0.00022004	0.00940446
AT5G15830	TG(20:4(5Z,8Z,11Z,14Z)/22:6(4Z,7Z,10Z,13Z,16Z,19Z)/22:6(4Z,7Z,10Z,13Z,16Z,19Z))	0.98786	0.000220163	0.00940446
AT4G16740	TG(16:0/18:2(9Z,12Z)/18:2(9Z,12Z))	0.98784	0.000220917	0.00940446
AT1G24140	18:2-Glc-Sitosterol	-0.987828	0.000221352	0.00940446
AT5G40210	TG(16:1(9Z)/18:3(9Z,12Z,15Z)/20:5(5Z,8Z,11Z,14Z,17Z))	0.987822	0.00022156	0.00940446
AT2G33380	18:3-Glc-Sitosterol	-0.987814	0.000221845	0.00940446
AT1G48100	PC(18:1(11Z)/18:3(6Z,9Z,12Z))	-0.987809	0.000222041	0.00940446
AT4G38825	PC(14:0/20:1(11Z))	0.987807	0.000222085	0.00940446
AT2G29350	TG(16:0/16:1(9Z)/20:5(5Z,8Z,11Z,14Z,17Z))	0.987806	0.00022212	0.00940446
AT1G67856	TG(16:0/18:2(9Z,12Z)/18:2(9Z,12Z))	0.987805	0.000222179	0.00940446
AT3G44350	PC(16:0/18:2(9Z,12Z))	-0.987801	0.000222298	0.00940446
AT5G41900	18:3-Glc-Sitosterol	-0.987799	0.000222384	0.00940446
AT5G22920	PC(14:1(9Z)/22:2(13Z,16Z))	0.987798	0.000222415	0.00940446
AT4G38560	TG(18:1(9Z)/18:2(9Z,12Z)/18:3(9Z,12Z,15Z))	0.98779	0.000222726	0.00940446
AT3G46090	DG(12:0/22:6(4Z,7Z,10Z,13Z,16Z,19Z)/0:0)	-0.987782	0.000222994	0.00940446
AT4G03210	DG(14:1(9Z)/20:5(5Z,8Z,11Z,14Z,17Z)/0:0)	0.987781	0.000223044	0.00940446
AT4G21850	PC(18:1(11Z)/18:3(6Z,9Z,12Z))	-0.98777	0.000223437	0.00940446
AT5G02490	PC(18:1(11Z)/18:3(6Z,9Z,12Z))	-0.987768	0.000223505	0.00940446
AT2G30360	18:2-Glc-Sitosterol	-0.987762	0.000223741	0.00940446
AT5G59730	PC(14:1(9Z)/22:2(13Z,16Z))	-0.987743	0.00022443	0.00940446
AT5G60680	18:3-Glc-Sitosterol	0.987741	0.000224515	0.00940446
AT3G49790	TG(16:0/16:1(9Z)/20:5(5Z,8Z,11Z,14Z,17Z))	-0.987738	0.000224605	0.00940446
AT4G38340	PC(14:1(9Z)/22:1(13Z))	0.987736	0.000224682	0.00940446
AT5G19100	PC(14:1(9Z)/22:2(13Z,16Z))	-0.987735	0.00022472	0.00940446
AT4G34970	PC(16:0/18:2(9Z,12Z))	0.987734	0.000224759	0.00940446
AT3G56260	TG(18:1(9Z)/18:2(9Z,12Z)/18:3(9Z,12Z,15Z))	0.987732	0.00022482	0.00940446
AT1G76090	DG(14:1(9Z)/20:5(5Z,8Z,11Z,14Z,17Z)/0:0)	0.987727	0.000225014	0.00940446
AT3G56260	18:3-Glc-Sitosterol	-0.987724	0.000225137	0.00940446
AT2G06850	PC(14:0/20:1(11Z))	0.987722	0.000225215	0.00940446
AT1G15125	18:3-Glc-Sitosterol	0.987721	0.000225243	0.00940446
AT3G25180	PC(18:1(11Z)/18:3(6Z,9Z,12Z))	-0.98772	0.00022528	0.00940446
AT5G28770	PC(14:0/20:1(11Z))	0.987716	0.000225416	0.00940446
AT5G03204	TG(16:0/18:2(9Z,12Z)/18:3(9Z,12Z,15Z))	0.987711	0.000225591	0.00940446
AT2G18680	DG(18:0/18:3(9Z,12Z,15Z)/0:0)	0.987711	0.000225601	0.00940446
AT1G11260	PC(18:1(11Z)/18:3(6Z,9Z,12Z))	0.987705	0.000225804	0.00940446
AT3G48520	18:3-Glc-Sitosterol	-0.987702	0.000225927	0.00940446
AT1G32910	18:3-Glc-Sitosterol	-0.987696	0.000226148	0.00940446
AT3G56000	DG(18:4(6Z,9Z,12Z,15Z)/16:1(9Z)/0:0)	-0.98769	0.000226389	0.00940446
AT1G28040	PE(18:3(9Z,12Z,15Z)/18:1(9Z))	0.987685	0.000226556	0.00940446
AT3G56260	PC(14:1(9Z)/22:2(13Z,16Z))	-0.987679	0.000226787	0.00940446
AT5G01790	PC(18:1(11Z)/18:3(6Z,9Z,12Z))	-0.987669	0.000227155	0.00940446
AT5G14120	18:2-Glc-Sitosterol	0.987657	0.000227582	0.00940446
AT5G10150	18:2-Glc-Sitosterol	0.987652	0.000227763	0.00940446
AT2G17230	PC(18:1(11Z)/18:3(6Z,9Z,12Z))	0.98765	0.000227854	0.00940446
AT1G68440	PC(14:1(9Z)/22:2(13Z,16Z))	0.987637	0.000228317	0.00940446
AT1G10550	PC(18:1(11Z)/18:3(6Z,9Z,12Z))	0.987635	0.000228406	0.00940446
AT1G24330	PC(18:1(11Z)/18:3(6Z,9Z,12Z))	-0.987624	0.000228815	0.00940446
AT2G39220	TG(16:0/16:1(9Z)/20:5(5Z,8Z,11Z,14Z,17Z))	0.987619	0.000228977	0.00940446
AT5G19100	DG(14:1(9Z)/20:5(5Z,8Z,11Z,14Z,17Z)/0:0)	-0.987611	0.000229283	0.00940446
AT1G25230	PC(14:1(9Z)/22:2(13Z,16Z))	0.987606	0.000229454	0.00940446
AT5G28237	PC(14:1(9Z)/22:2(13Z,16Z))	-0.987586	0.000230197	0.00940446
AT3G59750	TG(16:1(9Z)/18:3(9Z,12Z,15Z)/20:5(5Z,8Z,11Z,14Z,17Z))	0.987586	0.00023022	0.00940446
AT5G41070	DG(18:4(6Z,9Z,12Z,15Z)/16:1(9Z)/0:0)	0.987574	0.000230632	0.00940446
AT1G01620	TG(20:4(5Z,8Z,11Z,14Z)/22:6(4Z,7Z,10Z,13Z,16Z,19Z)/22:6(4Z,7Z,10Z,13Z,16Z,19Z))	0.987572	0.00023074	0.00940446
AT3G25760	TG(16:0/16:1(9Z)/20:5(5Z,8Z,11Z,14Z,17Z))	0.987571	0.00023075	0.00940446
AT5G38700	DG(14:1(9Z)/20:5(5Z,8Z,11Z,14Z,17Z)/0:0)	-0.98756	0.000231175	0.00940446
AT4G38860	DG(18:4(6Z,9Z,12Z,15Z)/16:1(9Z)/0:0)	0.987558	0.00023126	0.00940446
AT4G22620	TG(18:2(9Z,12Z)/18:2(9Z,12Z)/18:3(9Z,12Z,15Z))	0.987556	0.000231325	0.00940446
AT2G20835	18:2-Glc-Sitosterol	0.987549	0.000231591	0.00940446
AT5G51850	Cer(t18:1(8E)/26:0(2OH[R]))	-0.987541	0.000231871	0.00940446
AT5G49480	PC(16:0/18:2(9Z,12Z))	-0.987539	0.000231942	0.00940446
AT2G27690	18:2-Glc-Sitosterol	-0.987535	0.000232083	0.00940446
AT2G42760	18:3-Glc-Sitosterol	-0.987527	0.000232397	0.00940446
AT1G68840	PC(14:0/20:1(11Z))	0.987521	0.000232621	0.00940446
AT5G51550	PC(16:0/18:2(9Z,12Z))	0.987518	0.000232737	0.00940446
AT2G30600	PC(14:1(9Z)/22:2(13Z,16Z))	0.987513	0.000232911	0.00940446
AT2G33380	TG(16:0/18:2(9Z,12Z)/18:2(9Z,12Z))	0.98751	0.000233024	0.00940446
AT5G66920	PC(14:1(9Z)/22:2(13Z,16Z))	0.987508	0.000233084	0.00940446
AT2G39650	TG(16:1(9Z)/18:3(9Z,12Z,15Z)/20:5(5Z,8Z,11Z,14Z,17Z))	0.987502	0.000233306	0.00940446
AT3G62950	PC(14:1(9Z)/22:2(13Z,16Z))	0.987499	0.000233441	0.00940446
AT3G46660	TG(16:0/16:1(9Z)/20:5(5Z,8Z,11Z,14Z,17Z))	0.987492	0.000233683	0.00940446
AT5G47330	TG(18:2(9Z,12Z)/18:2(9Z,12Z)/18:3(9Z,12Z,15Z))	0.987492	0.000233694	0.00940446
AT1G50040	PC(14:1(9Z)/22:2(13Z,16Z))	0.987488	0.000233839	0.00940446
AT3G24982	18:3-Glc-Sitosterol	-0.987487	0.000233874	0.00940446
AT3G24982	TG(16:0/18:2(9Z,12Z)/18:2(9Z,12Z))	0.987487	0.000233884	0.00940446
AT2G42580	PC(14:0/20:1(11Z))	0.987478	0.00023423	0.00940446
AT5G16080	DG(18:3(6Z,9Z,12Z)/16:1(9Z)/0:0)	0.987474	0.000234384	0.00940446
AT5G03355	DG(18:4(6Z,9Z,12Z,15Z)/16:1(9Z)/0:0)	-0.987473	0.000234415	0.00940446
AT1G66390	TG(16:0/18:2(9Z,12Z)/18:3(9Z,12Z,15Z))	0.987469	0.000234573	0.00940446
AT1G19180	18:2-Glc-Stigmasterol	-0.987466	0.00023465	0.00940446
AT2G25770	16:3-Glc-Sitosterol	0.987464	0.000234758	0.00940446
AT2G34930	18:2-Glc-Sitosterol	-0.987458	0.000234975	0.00940446
AT5G04475	PE(16:0/18:2(9Z,12Z))	0.987447	0.000235371	0.00940446
AT3G60470	PC(16:0/18:2(9Z,12Z))	-0.987444	0.000235493	0.00940446
AT4G36010	PC(14:1(9Z)/22:2(13Z,16Z))	-0.987436	0.000235804	0.00940446
AT3G50930	TG(16:0/16:1(9Z)/20:5(5Z,8Z,11Z,14Z,17Z))	0.987436	0.000235808	0.00940446
AT5G67080	PC(14:0/20:1(11Z))	-0.987428	0.000236106	0.00940446
AT2G30600	TG(20:4(5Z,8Z,11Z,14Z)/22:6(4Z,7Z,10Z,13Z,16Z,19Z)/22:6(4Z,7Z,10Z,13Z,16Z,19Z))	0.987426	0.000236163	0.00940446
AT2G42580	18:3-Glc-Sitosterol	0.987424	0.000236221	0.00940446
AT2G30930	18:3-Glc-Sitosterol	0.987424	0.000236241	0.00940446
AT2G25297	18:3-Glc-Sitosterol	-0.987415	0.000236589	0.00940446
AT1G68840	DG(14:1(9Z)/20:5(5Z,8Z,11Z,14Z,17Z)/0:0)	0.987413	0.000236657	0.00940446
AT1G74710	DG(14:1(9Z)/20:5(5Z,8Z,11Z,14Z,17Z)/0:0)	-0.987413	0.000236666	0.00940446
AT2G46400	TG(18:1(9Z)/18:2(9Z,12Z)/18:3(9Z,12Z,15Z))	0.987409	0.000236803	0.00940446
AT1G10000	PC(14:0/20:3(8Z,11Z,14Z))	0.987405	0.000236951	0.00940446
AT5G23870	PC(14:0/20:1(11Z))	0.987398	0.000237207	0.00940446
AT3G51450	18:3-Glc-Sitosterol	-0.987397	0.000237251	0.00940446
AT4G24700	PE(18:3(9Z,12Z,15Z)/18:1(9Z))	0.987393	0.000237398	0.00940446
AT5G22630	18:3-Glc-Sitosterol	-0.987387	0.000237643	0.00940446
AT3G21320	DG(18:0/18:3(9Z,12Z,15Z)/0:0)	0.987386	0.000237663	0.00940446
AT1G02380	PC(16:0/20:3(8Z,11Z,14Z))	0.987384	0.000237729	0.00940446
AT4G01330	PC(14:0/20:1(11Z))	0.98738	0.000237877	0.00940446
AT3G29035	PC(18:1(11Z)/18:3(6Z,9Z,12Z))	0.98738	0.000237892	0.00940446
AT4G29310	PC(14:0/20:1(11Z))	0.98738	0.000237909	0.00940446
AT5G27060	18:3-Glc-Sitosterol	-0.987376	0.000238024	0.00940446
AT1G62320	TG(16:0/16:1(9Z)/20:5(5Z,8Z,11Z,14Z,17Z))	0.987374	0.000238128	0.00940446
AT5G14700	PC(14:1(9Z)/22:2(13Z,16Z))	-0.987372	0.000238174	0.00940446
AT1G21240	PC(18:1(11Z)/18:3(6Z,9Z,12Z))	-0.987371	0.00023824	0.00940446
AT4G21680	DG(16:1(9Z)/18:3(9Z,12Z,15Z)/0:0)	0.987371	0.000238243	0.00940446
AT5G22380	PC(16:0/18:2(9Z,12Z))	-0.987362	0.000238571	0.00940446
AT5G01810	PC(18:1(11Z)/18:3(6Z,9Z,12Z))	0.987362	0.000238588	0.00940446
AT1G70130	TG(18:1(9Z)/18:2(9Z,12Z)/18:3(9Z,12Z,15Z))	0.987354	0.000238882	0.00940446
AT1G15125	PC(14:1(9Z)/22:2(13Z,16Z))	0.987349	0.000239077	0.00940446
AT1G44130	DG(16:1(9Z)/18:3(9Z,12Z,15Z)/0:0)	-0.987348	0.000239094	0.00940446
AT2G44130	PC(14:1(9Z)/22:1(13Z))	0.987345	0.000239202	0.00940446
AT5G60680	PC(14:0/20:1(11Z))	0.987344	0.000239237	0.00940446
AT5G14120	PC(16:0/18:2(9Z,12Z))	0.987344	0.000239258	0.00940446
AT2G32140	PC(16:0/18:2(9Z,12Z))	-0.987341	0.000239374	0.00940446
AT2G41990	DG(16:1(9Z)/18:1(9Z)/0:0)	0.98734	0.000239417	0.00940446
AT5G62520	DG(16:1(9Z)/18:2(9Z,12Z)/0:0)	0.987339	0.000239452	0.00940446
AT3G01513	TG(18:0/18:2(9Z,12Z)/18:3(9Z,12Z,15Z))	0.987338	0.000239469	0.00940446
AT1G32960	TG(16:1(9Z)/18:3(9Z,12Z,15Z)/20:5(5Z,8Z,11Z,14Z,17Z))	0.987337	0.000239521	0.00940446
AT5G46330	TG(16:0/16:1(9Z)/20:5(5Z,8Z,11Z,14Z,17Z))	-0.987327	0.000239888	0.00940446
AT1G74430	TG(16:0/18:2(9Z,12Z)/18:2(9Z,12Z))	0.987318	0.000240243	0.00940446
AT1G15670	PC(14:0/20:1(11Z))	0.987312	0.000240456	0.00940446
AT2G15890	PC(16:0/18:2(9Z,12Z))	0.987288	0.000241364	0.00940446
AT4G01080	TG(18:1(9Z)/18:2(9Z,12Z)/18:3(9Z,12Z,15Z))	0.987276	0.000241818	0.00940446
AT2G45220	TG(16:1(9Z)/18:3(9Z,12Z,15Z)/20:5(5Z,8Z,11Z,14Z,17Z))	0.987271	0.000242025	0.00940446
AT2G42870	PC(14:0/20:1(11Z))	0.987265	0.000242223	0.00940446
AT5G44130	18:3-Glc-Sitosterol	0.987264	0.000242281	0.00940446
AT4G39670	18:3-Glc-Sitosterol	-0.987262	0.000242343	0.00940446
AT3G23550	DG(14:1(9Z)/20:3(8Z,11Z,14Z)/0:0)	0.987258	0.000242485	0.00940446
AT1G32910	PC(18:1(11Z)/18:3(6Z,9Z,12Z))	-0.987255	0.000242603	0.00940446
AT5G11160	DG(14:1(9Z)/20:3(8Z,11Z,14Z)/0:0)	0.987255	0.000242606	0.00940446
AT1G19250	18:3-Glc-Stigmasterol	-0.987247	0.00024292	0.00940446
AT3G56260	TG(16:0/18:2(9Z,12Z)/18:2(9Z,12Z))	0.987242	0.000243121	0.00940446
AT3G02140	DG(14:1(9Z)/20:5(5Z,8Z,11Z,14Z,17Z)/0:0)	0.987237	0.000243303	0.00940446
AT1G52690	PE(18:3(9Z,12Z,15Z)/18:1(9Z))	0.987234	0.000243404	0.00940446
AT4G02330	18:3-Glc-Sitosterol	-0.987233	0.000243452	0.00940446
AT3G54020	TG(16:1(9Z)/18:3(9Z,12Z,15Z)/20:5(5Z,8Z,11Z,14Z,17Z))	0.987223	0.00024384	0.00940446
AT2G30020	18:2-Glc-Stigmasterol	-0.987218	0.000244016	0.00940446
AT1G32910	18:2-Glc-Sitosterol	-0.987215	0.000244141	0.00940446
AT3G60130	18:3-Glc-Sitosterol	0.987215	0.000244142	0.00940446
AT1G72240	PC(16:0/20:3(8Z,11Z,14Z))	-0.987212	0.000244239	0.00940446
AT1G11380	PC(16:0/20:3(8Z,11Z,14Z))	0.987212	0.000244273	0.00940446
AT5G60270	TG(16:0/16:1(9Z)/20:5(5Z,8Z,11Z,14Z,17Z))	-0.987209	0.000244362	0.00940446
AT5G37550	TG(18:0/18:2(9Z,12Z)/18:3(9Z,12Z,15Z))	0.987193	0.000244981	0.00940446
AT5G43650	TG(18:1(9Z)/18:2(9Z,12Z)/18:3(9Z,12Z,15Z))	0.987186	0.000245242	0.00940446
AT5G19110	DG(16:1(9Z)/18:2(9Z,12Z)/0:0)	0.987179	0.000245528	0.00940446
AT1G72240	18:3-Glc-Sitosterol	-0.987178	0.000245564	0.00940446
AT4G37540	PC(16:0/20:5(5Z,8Z,11Z,14Z,17Z))	0.987175	0.000245676	0.00940446
AT5G16410	PC(16:0/20:3(8Z,11Z,14Z))	0.987163	0.000246125	0.00940446
AT2G45170	PC(14:1(9Z)/22:2(13Z,16Z))	0.987163	0.000246135	0.00940446
AT2G34600	18:3-Glc-Sitosterol	-0.987159	0.000246269	0.00940446
AT5G55090	TG(16:1(9Z)/18:3(9Z,12Z,15Z)/20:5(5Z,8Z,11Z,14Z,17Z))	0.987158	0.000246313	0.00940446
AT1G66465	18:2-Glc-Stigmasterol	-0.987157	0.000246347	0.00940446
AT4G14640	TG(18:1(9Z)/18:2(9Z,12Z)/18:3(9Z,12Z,15Z))	0.987153	0.000246507	0.00940446
AT1G61120	TG(16:0/18:2(9Z,12Z)/18:2(9Z,12Z))	0.987138	0.000247078	0.00940446
AT4G08950	Cer(d14:1(4E)/26:0(2OH))	0.987137	0.000247102	0.00940446
AT1G57650	DG(14:1(9Z)/20:5(5Z,8Z,11Z,14Z,17Z)/0:0)	-0.987131	0.000247366	0.00940446
AT1G68400	PC(18:1(11Z)/18:3(6Z,9Z,12Z))	0.98713	0.000247394	0.00940446
AT4G16750	18:3-Glc-Stigmasterol	-0.987128	0.000247481	0.00940446
AT1G60190	TG(18:2(9Z,12Z)/18:2(9Z,12Z)/18:3(9Z,12Z,15Z))	0.987125	0.000247572	0.00940446
AT2G17660	TG(18:1(9Z)/18:2(9Z,12Z)/18:3(9Z,12Z,15Z))	0.987124	0.000247617	0.00940446
AT1G80440	PC(18:1(11Z)/18:3(6Z,9Z,12Z))	0.987114	0.000248022	0.00940446
AT3G60470	PC(18:1(11Z)/18:3(6Z,9Z,12Z))	-0.987106	0.000248317	0.00940446
AT1G67910	18:3-Glc-Sitosterol	0.987102	0.000248467	0.00940446
AT3G56260	DG(18:4(6Z,9Z,12Z,15Z)/16:1(9Z)/0:0)	0.987092	0.000248835	0.00940446
AT1G18710	TG(16:0/18:2(9Z,12Z)/18:2(9Z,12Z))	0.987089	0.000248966	0.00940446
AT1G32170	PC(16:0/18:2(9Z,12Z))	0.987085	0.000249102	0.00940446
AT1G16400	PC(14:1(9Z)/22:2(13Z,16Z))	-0.987083	0.000249191	0.00940446
AT1G02610	PC(14:0/20:1(11Z))	0.987082	0.000249219	0.00940446
AT3G20660	PC(14:0/20:1(11Z))	0.987076	0.000249471	0.00940446
AT2G28120	18:3-Glc-Sitosterol	0.987076	0.000249481	0.00940446
AT1G13340	18:3-Glc-Sitosterol	-0.987075	0.00024951	0.00940446
AT5G42380	TG(18:2(9Z,12Z)/18:2(9Z,12Z)/18:3(9Z,12Z,15Z))	0.987074	0.000249538	0.00940446
AT5G44130	PC(16:0/20:3(8Z,11Z,14Z))	0.987072	0.000249619	0.00940446
AT3G15635	PC(16:0/20:3(8Z,11Z,14Z))	0.98707	0.0002497	0.00940446
AT1G06620	TG(18:1(9Z)/18:2(9Z,12Z)/18:3(9Z,12Z,15Z))	0.987063	0.000249958	0.00940446
AT1G49130	Cer(d14:1(4E)/26:0(2OH))	0.987057	0.00025019	0.00940446
AT4G11460	DG(18:3(6Z,9Z,12Z)/18:3(9Z,12Z,15Z)/0:0)	0.987054	0.00025033	0.00940446
AT4G22620	18:2-Glc-Sitosterol	-0.987043	0.000250734	0.00940446
AT5G17030	DG(18:3(6Z,9Z,12Z)/16:1(9Z)/0:0)	0.98704	0.000250843	0.00940446
AT1G21240	18:3-Glc-Sitosterol	-0.98704	0.000250843	0.00940446
AT1G54000	TG(16:0/18:2(9Z,12Z)/18:3(9Z,12Z,15Z))	0.987038	0.000250939	0.00940446
AT3G56260	PC(18:1(11Z)/18:3(6Z,9Z,12Z))	-0.987029	0.000251277	0.00940446
AT2G29300	PC(14:1(9Z)/22:2(13Z,16Z))	0.987022	0.00025155	0.00940446
AT1G16400	18:3-Glc-Stigmasterol	-0.987019	0.000251671	0.00940446
AT5G48400	18:3-Glc-Stigmasterol	-0.987017	0.000251733	0.00940446
AT5G15430	DG(16:1(9Z)/18:2(9Z,12Z)/0:0)	0.987012	0.000251938	0.00940446
AT1G22330	18:3-Glc-Sitosterol	0.987008	0.000252096	0.00940446
AT5G08150	18:2-Glc-Sitosterol	0.987003	0.000252279	0.00940446
AT5G49450	PC(14:1(9Z)/22:2(13Z,16Z))	0.987002	0.000252321	0.00940446
AT5G25240	18:3-Glc-Sitosterol	0.986999	0.000252422	0.00940446
AT2G44840	TG(16:1(9Z)/18:3(9Z,12Z,15Z)/20:5(5Z,8Z,11Z,14Z,17Z))	0.986994	0.000252616	0.00940446
AT2G24850	PC(18:1(11Z)/18:3(6Z,9Z,12Z))	-0.986994	0.000252644	0.00940446
AT5G15430	MG(18:1(9Z)/0:0/0:0)	0.986992	0.000252697	0.00940446
AT1G01680	18:3-Glc-Stigmasterol	-0.98699	0.000252789	0.00940446
AT3G49790	18:3-Glc-Sitosterol	0.986988	0.000252882	0.00940446
AT2G16660	PC(14:0/20:1(11Z))	0.986986	0.00025295	0.00940446
AT1G69780	TG(20:4(5Z,8Z,11Z,14Z)/22:6(4Z,7Z,10Z,13Z,16Z,19Z)/22:6(4Z,7Z,10Z,13Z,16Z,19Z))	0.986985	0.000252982	0.00940446
AT1G66230	PC(14:1(9Z)/22:1(13Z))	0.986984	0.000253025	0.00940446
AT2G34510	PC(18:1(11Z)/18:3(6Z,9Z,12Z))	0.986977	0.000253301	0.00940446
AT1G02650	PG(16:1(9Z)/18:3(9Z,12Z,15Z))	0.986976	0.000253326	0.00940446
AT5G16410	PC(14:1(9Z)/22:1(13Z))	0.986974	0.000253391	0.00940446
AT4G29800	TG(18:0/18:2(9Z,12Z)/18:3(9Z,12Z,15Z))	0.986973	0.000253447	0.00940446
AT4G25410	TG(20:4(5Z,8Z,11Z,14Z)/22:6(4Z,7Z,10Z,13Z,16Z,19Z)/22:6(4Z,7Z,10Z,13Z,16Z,19Z))	-0.98697	0.000253569	0.00940446
AT1G55390	DG(18:4(6Z,9Z,12Z,15Z)/16:1(9Z)/0:0)	-0.986961	0.00025393	0.00940446
AT2G11891	PC(16:0/20:5(5Z,8Z,11Z,14Z,17Z))	0.986956	0.000254095	0.00940446
AT1G22530	PC(18:1(11Z)/18:3(6Z,9Z,12Z))	0.986944	0.000254558	0.00940446
AT4G16563	18:2-Glc-Sitosterol	0.986938	0.000254825	0.00940446
AT1G72240	PC(18:1(11Z)/18:3(6Z,9Z,12Z))	-0.986936	0.000254892	0.00940446
AT2G36540	PC(18:1(11Z)/18:3(6Z,9Z,12Z))	0.98693	0.00025512	0.00940446
AT4G27140	18:2-Glc-Stigmasterol	-0.98693	0.000255129	0.00940446
AT1G71390	18:3-Glc-Sitosterol	-0.986927	0.000255227	0.00940446
AT4G34810	18:2-Glc-Stigmasterol	0.986927	0.00025525	0.00940446
AT4G16740	DG(18:1(9Z)/18:3(9Z,12Z,15Z)/0:0)	-0.986918	0.000255584	0.00940446
AT5G65730	PC(14:1(9Z)/22:1(13Z))	0.986918	0.000255603	0.00940446
AT1G70500	TG(18:1(9Z)/18:2(9Z,12Z)/18:3(9Z,12Z,15Z))	0.986911	0.000255849	0.00940446
AT3G01830	PC(18:1(11Z)/18:3(6Z,9Z,12Z))	-0.98691	0.000255891	0.00940446
AT2G41990	DG(14:1(9Z)/20:5(5Z,8Z,11Z,14Z,17Z)/0:0)	0.986898	0.000256381	0.00940446
AT5G53750	18:3-Glc-Sitosterol	-0.986894	0.000256537	0.00940446
AT5G65730	PC(16:0/20:3(8Z,11Z,14Z))	0.986891	0.000256633	0.00940446
AT4G15248	18:2-Glc-Sitosterol	-0.986889	0.000256731	0.00940446
AT3G57270	TG(16:0/16:1(9Z)/20:5(5Z,8Z,11Z,14Z,17Z))	0.986888	0.000256746	0.00940446
AT2G29490	PC(18:1(11Z)/18:3(6Z,9Z,12Z))	-0.986884	0.000256929	0.00940446
AT1G17380	TG(16:0/18:2(9Z,12Z)/18:2(9Z,12Z))	0.986882	0.000256993	0.00940446
AT5G02190	DG(18:3(6Z,9Z,12Z)/16:1(9Z)/0:0)	0.986877	0.000257198	0.00940446
AT5G02190	18:3-Glc-Stigmasterol	-0.986875	0.000257265	0.00940446
AT2G15880	PC(18:1(11Z)/18:3(6Z,9Z,12Z))	0.986872	0.000257384	0.00940446
AT1G67910	PC(18:1(11Z)/18:3(6Z,9Z,12Z))	0.986871	0.000257423	0.00940446
AT1G02620	PC(16:0/20:3(8Z,11Z,14Z))	0.986869	0.000257493	0.00940446
AT1G14280	PC(16:0/20:3(8Z,11Z,14Z))	0.986868	0.000257561	0.00940446
AT2G15890	PC(18:1(11Z)/18:3(6Z,9Z,12Z))	0.986865	0.000257651	0.00940446
AT1G65890	PC(16:0/18:2(9Z,12Z))	-0.986864	0.000257701	0.00940446
AT4G18430	TG(18:1(9Z)/18:2(9Z,12Z)/18:3(9Z,12Z,15Z))	0.98686	0.000257868	0.00940446
AT4G27654	18:2-Glc-Stigmasterol	-0.986856	0.000258025	0.00940446
AT4G23150	18:3-Glc-Sitosterol	-0.986853	0.000258123	0.00940446
AT1G65890	TG(16:0/16:1(9Z)/20:5(5Z,8Z,11Z,14Z,17Z))	0.986839	0.000258685	0.00940446
AT1G80840	TG(18:2(9Z,12Z)/18:2(9Z,12Z)/18:3(9Z,12Z,15Z))	0.98683	0.000259039	0.00940446
AT4G16563	18:3-Glc-Sitosterol	0.986826	0.000259197	0.00940446
AT5G23870	18:3-Glc-Sitosterol	0.986823	0.000259302	0.00940446
AT1G74430	18:2-Glc-Stigmasterol	-0.986821	0.000259382	0.00940446
AT3G02840	16:0-Glc-Stigmasterol	-0.986821	0.000259398	0.00940446
AT1G22530	PC(16:0/18:2(9Z,12Z))	0.986819	0.000259454	0.00940446
AT1G11960	PC(14:1(9Z)/22:2(13Z,16Z))	-0.986819	0.000259461	0.00940446
AT5G37550	TG(16:1(9Z)/18:3(9Z,12Z,15Z)/20:5(5Z,8Z,11Z,14Z,17Z))	0.986814	0.000259663	0.00940446
AT1G02400	18:3-Glc-Sitosterol	-0.986803	0.000260088	0.00940446
AT1G64220	DG(14:1(9Z)/20:3(8Z,11Z,14Z)/0:0)	0.986791	0.000260551	0.00940446
AT1G67856	TG(16:0/16:1(9Z)/20:5(5Z,8Z,11Z,14Z,17Z))	0.986787	0.000260729	0.00940446
AT5G41900	PC(14:1(9Z)/22:2(13Z,16Z))	-0.986786	0.000260748	0.00940446
AT1G48330	18:2-Glc-Stigmasterol	-0.986785	0.000260788	0.00940446
AT1G27460	TG(20:4(5Z,8Z,11Z,14Z)/22:6(4Z,7Z,10Z,13Z,16Z,19Z)/22:6(4Z,7Z,10Z,13Z,16Z,19Z))	0.986781	0.000260945	0.00940446
AT2G18620	DG(16:1(9Z)/18:1(9Z)/0:0)	-0.986774	0.000261223	0.00940446
AT1G78070	PC(14:1(9Z)/22:2(13Z,16Z))	-0.986772	0.000261317	0.00940446
AT3G18950	18:3-Glc-Stigmasterol	-0.986765	0.000261575	0.00940446
AT5G35750	PC(18:1(11Z)/18:3(6Z,9Z,12Z))	0.98676	0.000261793	0.00940446
AT3G07380	16:0-Glc-Stigmasterol	0.986756	0.000261926	0.00940446
AT4G09300	PC(14:0/20:1(11Z))	-0.986723	0.000263231	0.00940446
AT5G05220	PC(14:0/20:1(11Z))	-0.986716	0.000263521	0.00940446
AT5G44020	18:2-Glc-Sitosterol	0.986716	0.000263529	0.00940446
AT1G77210	DG(14:1(9Z)/20:5(5Z,8Z,11Z,14Z,17Z)/0:0)	0.986715	0.000263554	0.00940446
AT5G44050	PC(18:1(11Z)/18:3(6Z,9Z,12Z))	-0.986714	0.000263592	0.00940446
AT5G01540	PC(18:1(11Z)/18:3(6Z,9Z,12Z))	-0.986714	0.000263622	0.00940446
AT3G19680	PC(18:1(11Z)/18:3(6Z,9Z,12Z))	0.986707	0.000263879	0.00940446
AT2G29300	PC(16:0/18:2(9Z,12Z))	0.986704	0.000263983	0.00940446
AT5G03210	PC(14:0/20:1(11Z))	-0.986699	0.000264211	0.00940446
AT3G25290	PE(18:3(9Z,12Z,15Z)/18:1(9Z))	0.986695	0.000264345	0.00940446
AT4G38860	18:3-Glc-Sitosterol	-0.986685	0.000264772	0.00940446
AT1G54010	TG(18:1(9Z)/18:2(9Z,12Z)/18:3(9Z,12Z,15Z))	0.986684	0.000264806	0.00940446
AT5G16360	18:2-Glc-Stigmasterol	-0.986682	0.000264887	0.00940446
AT5G57010	TG(18:1(9Z)/18:2(9Z,12Z)/18:3(9Z,12Z,15Z))	0.986681	0.000264918	0.00940446
AT5G54470	TG(20:4(5Z,8Z,11Z,14Z)/22:6(4Z,7Z,10Z,13Z,16Z,19Z)/22:6(4Z,7Z,10Z,13Z,16Z,19Z))	-0.986671	0.000265304	0.00940446
AT3G19970	PC(14:1(9Z)/22:2(13Z,16Z))	-0.98667	0.000265351	0.00940446
AT5G44680	PC(18:1(11Z)/18:3(6Z,9Z,12Z))	0.986667	0.000265475	0.00940446
AT1G23480	PC(14:0/20:1(11Z))	0.986661	0.000265704	0.00940446
AT3G57260	PC(14:1(9Z)/22:2(13Z,16Z))	-0.986653	0.000266013	0.00940446
AT2G38240	PC(18:1(11Z)/18:3(6Z,9Z,12Z))	-0.986644	0.000266386	0.00940446
AT1G68400	PC(14:0/20:1(11Z))	0.98664	0.000266533	0.00940446
AT1G15670	PC(16:0/18:2(9Z,12Z))	0.986639	0.000266563	0.00940446
AT5G49360	PC(18:1(11Z)/18:3(6Z,9Z,12Z))	0.986637	0.000266681	0.00940446
AT3G23240	DG(18:3(6Z,9Z,12Z)/16:1(9Z)/0:0)	0.986636	0.000266705	0.00940446
AT1G29640	TG(16:0/18:2(9Z,12Z)/18:2(9Z,12Z))	0.986627	0.000267056	0.00940446
AT5G02760	TG(20:4(5Z,8Z,11Z,14Z)/22:6(4Z,7Z,10Z,13Z,16Z,19Z)/22:6(4Z,7Z,10Z,13Z,16Z,19Z))	0.986624	0.000267164	0.00940446
AT3G09940	PC(18:1(11Z)/18:3(6Z,9Z,12Z))	-0.986623	0.000267215	0.00940446
AT1G52720	18:2-Glc-Sitosterol	-0.98662	0.000267333	0.00940446
AT2G17660	18:2-Glc-Stigmasterol	-0.98662	0.000267344	0.00940446
AT5G52760	TG(18:1(9Z)/18:2(9Z,12Z)/18:3(9Z,12Z,15Z))	0.986618	0.000267413	0.00940446
AT3G57270	PC(18:1(11Z)/18:3(6Z,9Z,12Z))	-0.986613	0.000267614	0.00940446
AT5G64310	16:0-Glc-Stigmasterol	-0.986607	0.00026785	0.00940446
AT3G26510	18:2-Glc-Sitosterol	0.986605	0.000267945	0.00940446
AT5G44390	TG(16:0/16:1(9Z)/20:5(5Z,8Z,11Z,14Z,17Z))	0.986605	0.000267946	0.00940446
AT4G30280	16:0-Glc-Stigmasterol	-0.986596	0.000268283	0.00940446
AT1G09930	TG(16:1(9Z)/18:3(9Z,12Z,15Z)/20:5(5Z,8Z,11Z,14Z,17Z))	0.986596	0.000268289	0.00940446
AT5G57560	Cer(d14:1(4E)/26:0(2OH))	0.986593	0.000268398	0.00940446
AT5G25240	16:0-Glc-Stigmasterol	0.986593	0.000268407	0.00940446
AT5G60270	PC(16:0/18:2(9Z,12Z))	0.986589	0.000268582	0.00940446
AT3G14780	DG(18:0/18:2(9Z,12Z)/0:0)	0.986586	0.000268695	0.00940446
AT1G16500	PC(14:1(9Z)/22:2(13Z,16Z))	-0.986584	0.000268773	0.00940446
AT4G05100	18:3-Glc-Sitosterol	-0.986584	0.000268779	0.00940446
AT5G11160	18:3-Glc-Sitosterol	0.986576	0.00026909	0.00940446
AT4G34550	DG(18:0/18:2(9Z,12Z)/0:0)	0.98657	0.00026932	0.00940446
AT4G14630	DG(18:0/18:3(9Z,12Z,15Z)/0:0)	0.986565	0.000269524	0.00940446
AT5G03120	TG(16:1(9Z)/18:3(9Z,12Z,15Z)/20:5(5Z,8Z,11Z,14Z,17Z))	-0.98656	0.000269719	0.00940446
AT3G62950	DG(14:1(9Z)/20:5(5Z,8Z,11Z,14Z,17Z)/0:0)	0.986556	0.000269881	0.00940446
AT4G08170	18:2-Glc-Sitosterol	-0.986554	0.000269971	0.00940446
AT1G49032	PC(16:0/18:2(9Z,12Z))	0.986554	0.000269993	0.00940446
AT2G34500	16:0-Glc-Stigmasterol	-0.986553	0.00027001	0.00940446
AT5G53030	TG(18:2(9Z,12Z)/18:3(9Z,12Z,15Z)/18:3(9Z,12Z,15Z))	0.98655	0.000270139	0.00940446
AT1G09155	18:3-Glc-Stigmasterol	-0.986548	0.000270207	0.00940446
AT2G30930	PC(14:0/20:1(11Z))	0.986544	0.000270373	0.00940446
AT1G70170	TG(16:0/16:1(9Z)/20:5(5Z,8Z,11Z,14Z,17Z))	0.986543	0.000270411	0.00940446
AT1G30370	18:2-Glc-Sitosterol	-0.986543	0.000270412	0.00940446
AT3G02840	18:2-Glc-Sitosterol	-0.98654	0.000270519	0.00940446
AT5G64750	18:2-Glc-Stigmasterol	-0.986539	0.000270566	0.00940446
AT1G47130	TG(18:2(9Z,12Z)/18:3(9Z,12Z,15Z)/18:3(9Z,12Z,15Z))	0.986535	0.000270753	0.00940446
AT2G22880	PC(14:1(9Z)/22:2(13Z,16Z))	-0.986534	0.000270787	0.00940446
AT1G16370	16:0-Glc-Stigmasterol	-0.986531	0.000270896	0.00940446
AT1G61890	18:3-Glc-Sitosterol	-0.98653	0.000270936	0.00940446
AT1G17380	18:3-Glc-Sitosterol	-0.986527	0.00027105	0.00940446
AT3G17120	18:2-Glc-Sitosterol	-0.986525	0.000271147	0.00940446
AT3G29250	TG(16:1(9Z)/18:3(9Z,12Z,15Z)/20:5(5Z,8Z,11Z,14Z,17Z))	0.986516	0.000271485	0.00940446
AT1G68320	Cer(d14:1(4E)/26:0(2OH))	0.986516	0.000271492	0.00940446
AT1G09155	PE(18:3(9Z,12Z,15Z)/18:1(9Z))	0.986514	0.000271586	0.00940446
AT5G21940	PC(14:1(9Z)/22:2(13Z,16Z))	0.986507	0.000271855	0.00940446
AT3G12833	TG(16:1(9Z)/18:3(9Z,12Z,15Z)/20:5(5Z,8Z,11Z,14Z,17Z))	0.986502	0.000272047	0.00940446
AT2G02310	TG(18:1(9Z)/18:2(9Z,12Z)/18:3(9Z,12Z,15Z))	0.986496	0.000272296	0.00940446
AT3G18710	16:0-Glc-Stigmasterol	-0.986493	0.000272419	0.00940446
AT4G01330	PC(18:1(11Z)/18:3(6Z,9Z,12Z))	0.986487	0.000272666	0.00940446
AT1G08250	PC(14:1(9Z)/22:2(13Z,16Z))	-0.986484	0.000272777	0.00940446
AT2G16660	TG(20:4(5Z,8Z,11Z,14Z)/22:6(4Z,7Z,10Z,13Z,16Z,19Z)/22:6(4Z,7Z,10Z,13Z,16Z,19Z))	0.986483	0.000272839	0.00940446
AT3G56000	TG(16:0/16:1(9Z)/20:5(5Z,8Z,11Z,14Z,17Z))	-0.98648	0.000272962	0.00940446
AT4G13410	TG(16:0/18:2(9Z,12Z)/18:2(9Z,12Z))	0.986479	0.000272978	0.00940446
AT4G10500	18:3-Glc-Sitosterol	-0.986472	0.000273286	0.00940446
AT4G29740	TG(16:0/18:2(9Z,12Z)/18:2(9Z,12Z))	0.986463	0.000273624	0.00940446
AT4G03110	TG(16:0/16:1(9Z)/20:5(5Z,8Z,11Z,14Z,17Z))	-0.986461	0.000273717	0.00940446
AT2G14290	PC(14:0/20:1(11Z))	-0.986461	0.000273734	0.00940446
AT4G18210	18:2-Glc-Sitosterol	0.98646	0.000273751	0.00940446
AT4G22590	18:2-Glc-Sitosterol	-0.98646	0.000273763	0.00940446
AT1G69610	DG(18:0/18:3(9Z,12Z,15Z)/0:0)	0.986454	0.000274004	0.00940446
AT1G15670	PC(18:1(11Z)/18:3(6Z,9Z,12Z))	0.986453	0.000274056	0.00940446
AT3G13750	TG(16:0/16:1(9Z)/20:5(5Z,8Z,11Z,14Z,17Z))	-0.986452	0.000274075	0.00940446
AT5G10150	PC(16:0/18:2(9Z,12Z))	0.98645	0.000274163	0.00940446
AT5G59730	16:0-Glc-Stigmasterol	-0.98645	0.00027417	0.00940446
AT1G72520	18:3-Glc-Sitosterol	-0.986445	0.000274366	0.00940446
AT1G80820	PC(18:1(11Z)/18:3(6Z,9Z,12Z))	-0.986441	0.000274519	0.00940446
AT4G15680	DG(18:3(6Z,9Z,12Z)/18:3(9Z,12Z,15Z)/0:0)	0.986438	0.000274662	0.00940446
AT4G38860	TG(16:0/16:1(9Z)/20:5(5Z,8Z,11Z,14Z,17Z))	0.986426	0.000275128	0.00940446
AT1G53625	TG(16:1(9Z)/18:3(9Z,12Z,15Z)/20:5(5Z,8Z,11Z,14Z,17Z))	0.986421	0.000275344	0.00940446
AT3G13750	TG(20:4(5Z,8Z,11Z,14Z)/22:6(4Z,7Z,10Z,13Z,16Z,19Z)/22:6(4Z,7Z,10Z,13Z,16Z,19Z))	0.986419	0.000275427	0.00940446
AT5G01790	DG(14:1(9Z)/20:5(5Z,8Z,11Z,14Z,17Z)/0:0)	-0.986418	0.00027547	0.00940446
AT1G26210	PC(16:0/18:2(9Z,12Z))	0.986417	0.000275477	0.00940446
AT5G10150	PC(14:0/20:1(11Z))	0.986414	0.000275612	0.00940446
AT3G19970	18:3-Glc-Stigmasterol	-0.986411	0.000275721	0.00940446
AT4G36010	18:2-Glc-Sitosterol	-0.986409	0.000275822	0.00940446
AT5G14700	DG(14:1(9Z)/20:5(5Z,8Z,11Z,14Z,17Z)/0:0)	-0.986405	0.000275967	0.00940446
AT1G11260	PC(14:0/20:1(11Z))	0.986405	0.000275995	0.00940446
AT5G40630	TG(18:1(9Z)/18:2(9Z,12Z)/18:3(9Z,12Z,15Z))	0.986403	0.000276073	0.00940446
AT2G23100	PC(18:1(11Z)/18:3(6Z,9Z,12Z))	0.986397	0.000276323	0.00940446
AT3G46700	PE(18:3(9Z,12Z,15Z)/18:1(9Z))	0.986393	0.000276464	0.00940446
AT1G80820	18:3-Glc-Sitosterol	-0.986393	0.000276484	0.00940446
AT5G66740	TG(18:1(9Z)/18:2(9Z,12Z)/18:3(9Z,12Z,15Z))	0.986392	0.000276499	0.00940446
AT3G25780	TG(16:0/16:1(9Z)/20:5(5Z,8Z,11Z,14Z,17Z))	0.986387	0.00027672	0.00940446
AT3G30460	PE(18:3(9Z,12Z,15Z)/18:1(9Z))	0.986387	0.000276728	0.00940446
AT2G24210	PC(14:0/20:1(11Z))	-0.986384	0.000276832	0.00940446
AT2G23830	TG(16:0/16:1(9Z)/20:5(5Z,8Z,11Z,14Z,17Z))	0.986381	0.000276941	0.00940446
AT4G27450	TG(20:4(5Z,8Z,11Z,14Z)/22:6(4Z,7Z,10Z,13Z,16Z,19Z)/22:6(4Z,7Z,10Z,13Z,16Z,19Z))	0.986377	0.000277134	0.00940446
AT1G67910	PC(14:0/20:1(11Z))	0.986375	0.000277191	0.00940446
AT4G09300	18:3-Glc-Sitosterol	-0.986373	0.000277291	0.00940446
AT1G69490	PC(14:1(9Z)/22:2(13Z,16Z))	0.986371	0.000277355	0.00940446
AT1G53625	PC(16:0/18:2(9Z,12Z))	-0.986368	0.000277493	0.00940446
AT1G15670	TG(16:0/16:1(9Z)/20:5(5Z,8Z,11Z,14Z,17Z))	-0.986366	0.000277546	0.00940446
AT4G08930	18:2-Glc-Sitosterol	0.986364	0.000277625	0.00940446
AT2G45220	DG(16:1(9Z)/18:2(9Z,12Z)/0:0)	0.986357	0.000277941	0.00940446
AT5G58650	PC(14:1(9Z)/22:1(13Z))	0.986356	0.000277958	0.00940446
AT3G04140	DG(18:0/18:2(9Z,12Z)/0:0)	0.986352	0.000278117	0.00940446
AT1G17750	TG(16:1(9Z)/18:3(9Z,12Z,15Z)/20:5(5Z,8Z,11Z,14Z,17Z))	0.986351	0.000278152	0.00940446
AT1G61340	TG(18:2(9Z,12Z)/18:2(9Z,12Z)/18:3(9Z,12Z,15Z))	0.98635	0.000278212	0.00940446
AT3G25760	18:3-Glc-Sitosterol	-0.986346	0.000278377	0.00940446
AT3G46090	TG(16:0/16:1(9Z)/20:5(5Z,8Z,11Z,14Z,17Z))	0.986339	0.000278658	0.00940446
AT5G63130	18:2-Glc-Sitosterol	-0.986337	0.000278739	0.00940446
AT1G69490	PC(16:0/20:5(5Z,8Z,11Z,14Z,17Z))	0.986335	0.000278827	0.00940446
AT5G01540	PC(14:0/20:1(11Z))	-0.986334	0.000278878	0.00940446
AT3G45970	PC(16:0/18:2(9Z,12Z))	0.986331	0.000278981	0.00940446
AT2G17660	TG(16:0/18:2(9Z,12Z)/18:2(9Z,12Z))	0.986328	0.000279112	0.00940446
AT1G15125	TG(20:4(5Z,8Z,11Z,14Z)/22:6(4Z,7Z,10Z,13Z,16Z,19Z)/22:6(4Z,7Z,10Z,13Z,16Z,19Z))	0.986326	0.000279179	0.00940446
AT5G64190	DG(14:1(9Z)/20:5(5Z,8Z,11Z,14Z,17Z)/0:0)	0.986325	0.000279228	0.00940446
AT1G64390	TG(16:0/16:1(9Z)/20:5(5Z,8Z,11Z,14Z,17Z))	0.986322	0.000279334	0.00940446
AT1G74430	TG(16:0/16:1(9Z)/20:5(5Z,8Z,11Z,14Z,17Z))	0.986321	0.0002794	0.00940446
AT2G47190	18:2-Glc-Stigmasterol	-0.986312	0.000279743	0.00940446
AT2G39400	18:3-Glc-Sitosterol	0.986312	0.000279751	0.00940446
AT5G43650	PC(14:1(9Z)/22:2(13Z,16Z))	-0.986297	0.000280366	0.00940446
AT2G38240	18:3-Glc-Sitosterol	-0.986296	0.000280407	0.00940446
AT4G03110	DG(18:4(6Z,9Z,12Z,15Z)/16:1(9Z)/0:0)	-0.986296	0.000280427	0.00940446
AT5G47610	TG(16:0/16:1(9Z)/20:5(5Z,8Z,11Z,14Z,17Z))	0.986294	0.000280486	0.00940446
AT2G28120	PE(16:0/18:2(9Z,12Z))	0.986291	0.000280608	0.00940446
AT5G01560	DG(18:3(6Z,9Z,12Z)/16:1(9Z)/0:0)	0.986288	0.000280742	0.00940446
AT5G19190	PC(16:0/20:3(8Z,11Z,14Z))	0.986284	0.000280898	0.00940446
AT4G10500	DG(14:1(9Z)/20:5(5Z,8Z,11Z,14Z,17Z)/0:0)	-0.986283	0.000280954	0.00940446
AT1G53340	PC(14:1(9Z)/22:2(13Z,16Z))	0.98627	0.000281455	0.00940446
AT3G51910	TG(20:4(5Z,8Z,11Z,14Z)/22:6(4Z,7Z,10Z,13Z,16Z,19Z)/22:6(4Z,7Z,10Z,13Z,16Z,19Z))	0.98627	0.00028149	0.00940446
AT5G19120	PC(14:1(9Z)/22:2(13Z,16Z))	0.986266	0.000281651	0.00940446
AT1G16370	TG(18:2(9Z,12Z)/18:2(9Z,12Z)/18:3(9Z,12Z,15Z))	0.986261	0.000281848	0.00940446
AT1G78830	PC(18:1(11Z)/18:3(6Z,9Z,12Z))	0.98626	0.000281878	0.00940446
AT3G62150	DG(18:4(6Z,9Z,12Z,15Z)/16:1(9Z)/0:0)	-0.98626	0.000281896	0.00940446
AT4G27652	DG(18:0/18:3(9Z,12Z,15Z)/0:0)	0.986259	0.000281918	0.00940446
AT1G27460	TG(16:0/16:1(9Z)/20:5(5Z,8Z,11Z,14Z,17Z))	-0.986259	0.000281923	0.00940446
AT1G19180	TG(18:1(9Z)/18:2(9Z,12Z)/18:3(9Z,12Z,15Z))	0.986254	0.000282126	0.00940446
AT4G09300	PC(16:0/18:2(9Z,12Z))	-0.986249	0.000282344	0.00940446
AT5G16580	PC(14:1(9Z)/22:2(13Z,16Z))	0.986246	0.000282467	0.00940446
AT2G21510	DG(16:1(9Z)/18:2(9Z,12Z)/0:0)	0.986241	0.000282674	0.00940446
AT1G24140	18:3-Glc-Sitosterol	-0.986239	0.000282754	0.00940446
AT1G18620	DG(14:1(9Z)/20:5(5Z,8Z,11Z,14Z,17Z)/0:0)	0.986236	0.000282882	0.00940446
AT5G26920	PC(14:0/20:1(11Z))	-0.986234	0.000282941	0.00940446
AT3G48850	Cer(t18:1(8E)/26:0(2OH[R]))	-0.986231	0.00028309	0.00940446
AT3G22160	DG(14:1(9Z)/20:5(5Z,8Z,11Z,14Z,17Z)/0:0)	-0.986226	0.000283268	0.00940446
AT5G10280	DG(16:1(9Z)/18:2(9Z,12Z)/0:0)	0.986223	0.000283415	0.00940446
AT4G22780	TG(16:0/16:1(9Z)/20:5(5Z,8Z,11Z,14Z,17Z))	0.986221	0.000283463	0.00940446
AT4G15700	MGDG(18:3(9Z,12Z,15Z)/18:3(9Z,12Z,15Z))	0.986215	0.000283739	0.00940446
AT3G06080	PC(16:0/18:2(9Z,12Z))	0.986206	0.000284102	0.00940446
AT1G60190	16:0-Glc-Stigmasterol	-0.986203	0.00028421	0.00940446
AT1G09350	PC(14:1(9Z)/22:2(13Z,16Z))	-0.986202	0.000284281	0.00940446
AT3G60966	DG(18:3(6Z,9Z,12Z)/16:1(9Z)/0:0)	0.986198	0.000284444	0.00940446
AT5G47610	DG(14:1(9Z)/20:5(5Z,8Z,11Z,14Z,17Z)/0:0)	-0.986197	0.000284479	0.00940446
AT1G26210	18:3-Glc-Sitosterol	0.986195	0.000284544	0.00940446
AT2G29440	18:3-Glc-Sitosterol	-0.986178	0.000285268	0.00940446
AT3G54400	18:3-Glc-Stigmasterol	0.986177	0.000285288	0.00940446
AT1G43160	18:3-Glc-Sitosterol	-0.986171	0.000285528	0.00940446
AT5G08150	PC(14:1(9Z)/22:1(13Z))	0.98617	0.000285588	0.00940446
AT1G76640	DG(14:1(9Z)/20:5(5Z,8Z,11Z,14Z,17Z)/0:0)	-0.986166	0.00028573	0.00940446
AT5G25190	TG(20:4(5Z,8Z,11Z,14Z)/22:6(4Z,7Z,10Z,13Z,16Z,19Z)/22:6(4Z,7Z,10Z,13Z,16Z,19Z))	0.986158	0.000286092	0.00940446
AT5G23210	PC(14:0/20:1(11Z))	0.986156	0.000286177	0.00940446
AT2G01850	PC(14:0/20:1(11Z))	0.986155	0.000286204	0.00940446
AT1G23480	PC(16:0/18:2(9Z,12Z))	0.986152	0.000286324	0.00940446
AT3G58120	PC(14:0/20:1(11Z))	0.986151	0.000286377	0.00940446
AT2G23130	PC(16:0/20:3(8Z,11Z,14Z))	0.986147	0.000286518	0.00940446
AT1G70640	DG(14:1(9Z)/20:5(5Z,8Z,11Z,14Z,17Z)/0:0)	-0.986145	0.000286615	0.00940446
AT3G44326	18:3-Glc-Stigmasterol	-0.986144	0.000286672	0.00940446
AT3G25780	18:2-Glc-Stigmasterol	-0.986143	0.000286676	0.00940446
AT4G28190	DG(18:4(6Z,9Z,12Z,15Z)/16:1(9Z)/0:0)	-0.986134	0.000287085	0.00940446
AT3G23550	18:2-Glc-Sitosterol	0.98613	0.00028725	0.00940446
AT5G11160	PC(14:0/20:1(11Z))	0.986127	0.000287338	0.00940446
AT1G13670	DG(14:1(9Z)/20:3(8Z,11Z,14Z)/0:0)	0.986112	0.000287989	0.00940446
AT3G09940	PC(14:0/20:1(11Z))	-0.98611	0.000288042	0.00940446
AT5G05440	18:2-Glc-Sitosterol	0.986109	0.00028812	0.00940446
AT1G61340	TG(16:0/18:2(9Z,12Z)/18:3(9Z,12Z,15Z))	0.986107	0.000288177	0.00940446
AT2G42760	TG(16:0/18:2(9Z,12Z)/18:2(9Z,12Z))	0.986107	0.000288184	0.00940446
AT2G22930	TG(18:0/18:2(9Z,12Z)/18:3(9Z,12Z,15Z))	0.986105	0.000288272	0.00940446
AT3G57260	PC(16:0/18:2(9Z,12Z))	-0.986104	0.000288321	0.00940446
AT2G44940	PC(14:0/20:1(11Z))	-0.986091	0.000288839	0.00940446
AT5G13700	PC(16:0/18:2(9Z,12Z))	-0.98609	0.000288906	0.00940446
AT2G39220	DG(14:1(9Z)/20:5(5Z,8Z,11Z,14Z,17Z)/0:0)	-0.986088	0.000288969	0.00940446
AT1G70500	18:2-Glc-Stigmasterol	-0.986086	0.000289044	0.00940446
AT3G20660	PC(16:0/18:2(9Z,12Z))	0.986086	0.000289072	0.00940446
AT2G44130	PC(14:0/20:1(11Z))	0.986084	0.000289142	0.00940446
AT1G48100	18:2-Glc-Sitosterol	-0.986083	0.00028918	0.00940446
AT5G57010	DG(14:1(9Z)/20:5(5Z,8Z,11Z,14Z,17Z)/0:0)	-0.986081	0.000289263	0.00940446
AT1G13340	PC(14:1(9Z)/22:2(13Z,16Z))	-0.986075	0.000289496	0.00940446
AT4G27520	18:2-Glc-Sitosterol	-0.986068	0.000289796	0.00940446
AT4G22780	PC(14:1(9Z)/22:2(13Z,16Z))	-0.986063	0.000290003	0.00940446
AT5G48400	18:2-Glc-Sitosterol	-0.986061	0.000290077	0.00940446
AT1G01620	DG(14:1(9Z)/20:5(5Z,8Z,11Z,14Z,17Z)/0:0)	0.986054	0.000290387	0.00940446
AT1G19180	TG(16:0/18:2(9Z,12Z)/18:2(9Z,12Z))	0.986053	0.000290408	0.00940446
AT3G54400	PC(14:1(9Z)/22:1(13Z))	0.986047	0.000290653	0.00940446
AT2G45180	18:2-Glc-Sitosterol	0.986047	0.000290668	0.00940446
AT3G20660	16:0-Glc-Stigmasterol	0.986038	0.00029105	0.00940446
AT1G72540	TG(18:1(9Z)/18:2(9Z,12Z)/18:3(9Z,12Z,15Z))	0.986036	0.000291119	0.00940446
AT1G21240	18:3-Glc-Stigmasterol	-0.986028	0.000291473	0.00940446
AT2G20340	18:2-Glc-Sitosterol	-0.986027	0.00029152	0.00940446
AT5G49330	DG(18:0/18:2(9Z,12Z)/0:0)	0.98602	0.000291787	0.00940446
AT5G15350	18:3-Glc-Stigmasterol	0.986015	0.000292023	0.00940446
AT4G37520	TG(20:4(5Z,8Z,11Z,14Z)/22:6(4Z,7Z,10Z,13Z,16Z,19Z)/22:6(4Z,7Z,10Z,13Z,16Z,19Z))	0.986014	0.000292024	0.00940446
AT5G05220	PC(16:0/18:2(9Z,12Z))	-0.986013	0.00029209	0.00940446
AT5G06760	PE(18:3(9Z,12Z,15Z)/18:1(9Z))	0.986012	0.000292124	0.00940446
AT4G39070	TG(20:4(5Z,8Z,11Z,14Z)/22:6(4Z,7Z,10Z,13Z,16Z,19Z)/22:6(4Z,7Z,10Z,13Z,16Z,19Z))	0.986005	0.00029242	0.00940446
AT1G11380	PC(14:0/20:1(11Z))	0.986002	0.000292531	0.00940446
AT5G40210	16:0-Glc-Stigmasterol	-0.985995	0.000292827	0.00940446
AT4G01080	18:3-Glc-Sitosterol	-0.985993	0.000292901	0.00940446
AT3G12833	TG(18:0/18:2(9Z,12Z)/18:3(9Z,12Z,15Z))	0.98599	0.000293062	0.00940446
AT2G38310	18:3-Glc-Sitosterol	0.985988	0.000293125	0.00940446
AT1G25422	PC(14:1(9Z)/22:2(13Z,16Z))	-0.98598	0.00029345	0.00940446
AT1G74430	18:3-Glc-Sitosterol	-0.985977	0.000293567	0.00940446
AT3G49620	18:2-Glc-Sitosterol	0.985977	0.000293594	0.00940446
AT1G72520	TG(16:0/18:2(9Z,12Z)/18:2(9Z,12Z))	0.985975	0.000293682	0.00940446
AT4G28140	18:2-Glc-Stigmasterol	-0.985968	0.00029395	0.00940446
AT3G54400	PC(16:0/20:3(8Z,11Z,14Z))	0.985966	0.000294034	0.00940446
AT5G67480	18:3-Glc-Sitosterol	0.985965	0.000294092	0.00940446
AT2G25460	18:2-Glc-Stigmasterol	-0.985964	0.000294151	0.00940446
AT1G76090	18:3-Glc-Sitosterol	0.985963	0.000294175	0.00940446
AT4G18210	PE(16:0/18:2(9Z,12Z))	0.98596	0.000294319	0.00940446
AT2G45180	PC(16:0/18:2(9Z,12Z))	0.985957	0.000294425	0.00940446
AT1G28370	DG(18:1(9Z)/18:3(9Z,12Z,15Z)/0:0)	-0.985956	0.000294487	0.00940446
AT3G57520	18:3-Glc-Sitosterol	0.985952	0.000294633	0.00940446
AT3G23550	PC(14:0/20:1(11Z))	0.985951	0.000294661	0.00940446
AT4G15233	DG(18:4(6Z,9Z,12Z,15Z)/16:1(9Z)/0:0)	-0.98595	0.000294705	0.00940446
AT5G01540	PC(16:0/18:2(9Z,12Z))	-0.985946	0.00029489	0.00940446
AT5G44050	18:3-Glc-Sitosterol	-0.985945	0.000294922	0.00940446
AT1G13520	DG(18:3(6Z,9Z,12Z)/16:1(9Z)/0:0)	0.985943	0.000295013	0.00940446
AT3G23250	18:2-Glc-Sitosterol	-0.98594	0.000295141	0.00940446
AT4G33905	DG(18:0/18:3(9Z,12Z,15Z)/0:0)	0.985939	0.000295186	0.00940446
AT5G16360	DG(18:1(9Z)/18:3(9Z,12Z,15Z)/0:0)	-0.985938	0.00029522	0.00940446
AT1G19670	PC(14:1(9Z)/22:2(13Z,16Z))	-0.985937	0.000295248	0.00940446
AT2G18700	TG(16:0/16:1(9Z)/20:5(5Z,8Z,11Z,14Z,17Z))	-0.985933	0.000295409	0.00940446
AT1G80920	PC(18:1(11Z)/18:3(6Z,9Z,12Z))	0.985932	0.000295474	0.00940446
AT5G59510	TG(20:4(5Z,8Z,11Z,14Z)/22:6(4Z,7Z,10Z,13Z,16Z,19Z)/22:6(4Z,7Z,10Z,13Z,16Z,19Z))	-0.985928	0.000295657	0.00940446
AT5G65300	18:2-Glc-Stigmasterol	-0.985923	0.000295864	0.00940446
AT2G36080	18:3-Glc-Sitosterol	0.985921	0.000295913	0.00940446
AT4G16563	PE(16:0/18:2(9Z,12Z))	0.985918	0.000296048	0.00940446
AT4G21850	18:2-Glc-Sitosterol	-0.985918	0.000296063	0.00940446
AT4G29740	TG(16:0/18:2(9Z,12Z)/18:3(9Z,12Z,15Z))	0.985914	0.000296246	0.00940446
AT2G32200	18:3-Glc-Stigmasterol	-0.985913	0.000296284	0.00940446
AT4G15280	DG(14:1(9Z)/20:5(5Z,8Z,11Z,14Z,17Z)/0:0)	-0.985911	0.000296358	0.00940446
AT2G30010	DG(16:1(9Z)/18:3(9Z,12Z,15Z)/0:0)	0.985907	0.000296515	0.00940446
AT2G25460	18:3-Glc-Sitosterol	-0.985906	0.000296576	0.00940446
AT4G08930	PC(16:0/18:2(9Z,12Z))	0.9859	0.000296817	0.00940446
AT1G57630	18:3-Glc-Sitosterol	-0.985882	0.000297552	0.00940446
AT1G74100	PC(14:1(9Z)/22:2(13Z,16Z))	-0.98588	0.000297658	0.00940446
AT4G14130	DG(16:1(9Z)/18:1(9Z)/0:0)	0.985869	0.000298133	0.00940446
AT1G23390	PC(18:1(11Z)/18:3(6Z,9Z,12Z))	0.98586	0.000298502	0.00940446
AT1G69610	PC(14:1(9Z)/22:2(13Z,16Z))	-0.985858	0.000298583	0.00940446
AT5G49450	PC(18:1(11Z)/18:3(6Z,9Z,12Z))	0.985856	0.000298682	0.00940446
AT1G23030	18:2-Glc-Sitosterol	0.98585	0.000298929	0.00940446
AT1G08250	TG(16:1(9Z)/18:3(9Z,12Z,15Z)/20:5(5Z,8Z,11Z,14Z,17Z))	0.985848	0.000299	0.00940446
AT5G51790	PC(16:0/20:3(8Z,11Z,14Z))	0.985848	0.000299021	0.00940446
AT5G22520	DG(12:0/22:6(4Z,7Z,10Z,13Z,16Z,19Z)/0:0)	-0.985835	0.000299539	0.00940446
AT2G44940	PC(18:1(11Z)/18:3(6Z,9Z,12Z))	-0.985835	0.000299541	0.00940446
AT4G18210	18:3-Glc-Sitosterol	0.985832	0.000299685	0.00940446
AT3G44350	PC(16:0/20:3(8Z,11Z,14Z))	-0.985826	0.000299911	0.00940446
AT5G22545	DG(14:1(9Z)/20:5(5Z,8Z,11Z,14Z,17Z)/0:0)	-0.985826	0.00029995	0.00940446
AT1G02620	18:2-Glc-Sitosterol	0.985825	0.000299966	0.00940446
AT2G20340	18:3-Glc-Sitosterol	-0.985823	0.000300059	0.00940446
AT5G22920	DG(14:1(9Z)/20:5(5Z,8Z,11Z,14Z,17Z)/0:0)	0.985822	0.000300104	0.00940446
AT5G19230	TG(18:1(9Z)/18:2(9Z,12Z)/18:3(9Z,12Z,15Z))	0.985819	0.000300206	0.00940446
AT5G21940	TG(20:4(5Z,8Z,11Z,14Z)/22:6(4Z,7Z,10Z,13Z,16Z,19Z)/22:6(4Z,7Z,10Z,13Z,16Z,19Z))	0.985818	0.000300261	0.00940446
AT2G16660	DG(14:1(9Z)/20:5(5Z,8Z,11Z,14Z,17Z)/0:0)	0.985807	0.000300721	0.00940446
AT3G46650	PC(16:0/18:2(9Z,12Z))	-0.985802	0.000300929	0.00940446
AT5G22380	PC(16:0/20:3(8Z,11Z,14Z))	-0.985802	0.000300952	0.00940446
AT2G30830	PC(14:0/20:1(11Z))	-0.985802	0.000300953	0.00940446
AT4G19420	16:0-Glc-Stigmasterol	0.9858	0.000301031	0.00940446
AT5G51790	PC(14:1(9Z)/22:1(13Z))	0.985799	0.00030109	0.00940446
AT5G01540	18:2-Glc-Sitosterol	-0.985798	0.000301129	0.00940446
AT1G76650	16:0-Glc-Stigmasterol	-0.985796	0.000301206	0.00940446
AT4G29310	18:3-Glc-Sitosterol	0.985796	0.000301209	0.00940446
AT1G23030	PC(16:0/18:2(9Z,12Z))	0.985796	0.000301218	0.00940446
AT3G46700	DG(18:0/20:5(5Z,8Z,11Z,14Z,17Z)/0:0)	0.985783	0.00030173	0.00940446
AT4G23200	PC(14:0/20:1(11Z))	-0.98578	0.000301862	0.00940446
AT5G37710	18:2-Glc-Sitosterol	0.985775	0.000302067	0.00940446
AT4G15248	PC(18:1(11Z)/18:3(6Z,9Z,12Z))	-0.985772	0.000302193	0.00940446
AT3G48520	18:2-Glc-Sitosterol	-0.985771	0.000302239	0.00940446
AT2G25297	DG(14:1(9Z)/20:5(5Z,8Z,11Z,14Z,17Z)/0:0)	-0.985769	0.000302326	0.00940446
AT1G23030	PC(14:0/20:1(11Z))	0.985756	0.000302895	0.00940446
AT5G59530	DG(18:0/18:3(9Z,12Z,15Z)/0:0)	0.985754	0.000302998	0.00940446
AT5G36925	TG(18:1(9Z)/18:2(9Z,12Z)/18:3(9Z,12Z,15Z))	0.985751	0.000303099	0.00940446
AT1G15670	18:2-Glc-Sitosterol	0.985741	0.000303523	0.00940446
AT1G03300	PC(14:1(9Z)/22:1(13Z))	0.985739	0.000303632	0.00940446
AT2G22930	TG(16:1(9Z)/18:3(9Z,12Z,15Z)/20:5(5Z,8Z,11Z,14Z,17Z))	0.985731	0.00030396	0.00940446
AT1G09932	TG(18:1(9Z)/18:2(9Z,12Z)/18:3(9Z,12Z,15Z))	0.98573	0.000304014	0.00940446
AT3G50930	TG(18:1(9Z)/18:2(9Z,12Z)/18:3(9Z,12Z,15Z))	0.985722	0.000304348	0.00940446
AT1G30370	18:3-Glc-Sitosterol	-0.985718	0.000304508	0.00940446
AT3G24982	TG(16:0/16:1(9Z)/20:5(5Z,8Z,11Z,14Z,17Z))	0.985712	0.000304775	0.00940446
[truncated: 60,002 more rows]
