# Supplementary material for: Overexpression of Umellularia californica FatB thioesterase affects plant growth and lipid metabolome leading to improved drought tolerance in Arabidopsis and tomato
Source: Front Plant Sci. 2025 Jan 10;15:1446210. doi: 10.3389/fpls.2024.1446210 (PMC11757637; doi:10.3389/fpls.2024.1446210)
Supplement: Supplementary Table 7 — Primer sequences used in this study. [file Table7.xlsx]

## Sheet: Sheet1
Supplemental Table S7. Primer sequences used in this study.
Gene name	Primer sequences (FP, forward primer; RP, reverse primer)
qRT-PCR Primers
ACTIN2	FP	5’-GGAAGGATCTGTACGGTAAC-3’
	RP	5’-GGACCTGCCTCATCATACT-3’
DEX1	FP	5’-ACCCTACAACGTTACTACGACGCT-3’
	RP	5’-TCCGGTATTTTCCAGGGCGGTCA-3’
DYT1	FP	5’-AACCAGTGAGGATGAGCCGTAGG-3’
	RP	5’-CGCAGAGCCATAAGCCGACA-3’
MYB103	FP	5’-CGGTGGTCGTTGATTGCG-3’
	RP	5’-GATGCGAGAAAGGCTTGTGG-3’
A6	FP	5’-GGGTCAGAACTAACATCCTCCCT-3’
	RP	5’-CGCATCGCCGGTACAAGA-3’
LAP5	FP	5’-GGACTGGCTCATAAGAACTATAACC-3’
	RP	5’-CTTGCTCTCCTCCAACATATACTC-3’
ACOS5	FP	5’-CGAAAGCGACAGAAAAGGAA-3’
	RP	5’-TTGTTGATGCTGAGGATCTTG-3’
A7	FP	5’-CAACGTCGTCAAGTTTACGTC-3’
	RP	5’-TATCAACGGAGATGGGAAAGC-3’
CYP703A2	FP	5’-GGGCAAAACTGGAAGATGAA-3’
	RP	5’-CCATTCGTTTGTGACTGCTG-3’
PP2A	FP	5’-GTCCTGGCGTGTGCGTTATATG-3’
	RP	5’-GGCACCAGATCCGTCCTAGTTG-3’
PP2C	FP	5’-GCGGATAATCGGATGCAACG-3’
	RP	5’-TGGCGACGACGATGAAGAAT-3’
AtFATB	FP	5’-AATCATGTTAAGACTGCTGGATTGC-3’
	RP	5’-ATACCATTCTTTCCAGACTGACTGA-3’
UcFATB	FP	5’-TCATTGGCATCAGCTTTCTG-3’
	RP	5’-TGAGGCAATTTGGGTTTAGG-3’
RD29A	FP	5’-TGGCGGGAACTGTTGATGAG-3’
	RP	5’-CCACCAAACCAGCCAGATGA-3’
KIN1	FP	5’-ATGCCTTCCAAGCCGGTCA-3’
	RP	5’-CTTGTTCAGGCCGGTCTTGTC-3’
COR15A	FP	5’-GGCGATGTCTTTCTCAGGAGC-3’
	RP	5’-GCCTCTCCTGCTTTACCCTCC-3’
SlACTIN7	FP	5’-AGGCAGGATTTGCTGGTGATGATGCT-3’
	RP	5’-ATACGCATCCTTCTGTCCCATTCCGA-3’
SlAREB1	FP	5’-TCCTTATGTGTTTAATGGTGGTTT-3’
	RP	5’-CATCGTTTTCTTCTTTTAGTTTCG-3’
SlDREB1	FP	5’-GACTCATTGCCTCGCCCA-3’
	RP	5’-TTTCACCCAGTTCCTCCG-3’
SlDREB2A	FP	5’-CAATGAAGGGAAAGGGAAGC-3’
	RP	5’-TACCCAACCATAACCTACTACC-3’
AOC3	FP	5’-TGGCTTCTTCTTCTGCTGCT-3’
	RP	5’-AGCTCGAGTAACGTTGAGGT-3’
KCS9	FP	5’-ACGTGTTCTTCAATGGCGTC-3’
	RP	5’-TAGGAAGCTTTCGTCTTTCGT-3’
LOX3	FP	5’-CGAGGATTTGGTCAAAACGCT-3’
	RP	5’-GCTCCAAGACAATGTTTCGACC-3’
LOX4	FP	5’-AACACAGTTCTCCATCAACCCT-3’
	RP	5’-TGTTTTTGTTCCTCACCGTCG-3’
SMT2	FP	5’-GTCGCCGTCGGTATCTACTG-3’
	RP	5’-AGATTGTAGAATGTGTCGACGA-3’
SMT3	FP	5’-GCGCCGTCTACTGGTTCATA-3’
	RP	5’-TGACAAGATTGTAGAACGTGTCG-3’
SQS2	FP	5’-TGCGATTACGAAAGCTCAGA-3’
	RP	5’-TGCGATTACGAAAGCTCAGA-3’
Promoter primers
AtFatB-promoter	FP	5’-CCATGAACCTGGTCCTCAAT-3’
	RP	5’-GACGAGGAGATGAAGCGTTCAA-3’
T-DNA mutant primers
fatb-1	FP	5’-CGTGCTTGTTTAGCTGGAAAC-3’
	RP	5’-TTTTTGGTCTCATGGGTTAGC-3’
LBb1.3/BP		5’-ATTTTGCCGATTTCGGAAC-3
cDNA primers
UcFatB	FP	5’- ATGGCAACTACCTCATTGGCAT-3’
	RP	5’- TTAAACCCTTGGTTCAGCAGGA -3’
AtFatB	FP	5’-ATGGTGGCCACCTCTGCTAC -3’
	RP	5’-CGGTGCAGTTCCCCAAGTTGTT -3’
